# Supplementary material for: A genome-wide screen for human salicylic acid (SA)-binding proteins reveals targets through which SA may influence development of various diseases
Source: Sci Rep. 2019 Sep 11;9:13084. doi: 10.1038/s41598-019-49234-6 (PMC6739329; doi:10.1038/s41598-019-49234-6)
Supplement: Supplementary file 1 — Supplementary Table S1 [file 41598_2019_49234_MOESM1_ESM.xlsx]

## Sheet: S1
Supplementary Table S1. List of proteins identified in the screen for SABPs.
Protein IDs	Majority protein IDs	Peptide counts (all)	Peptide counts (razor+unique)	Peptide counts (unique)	Fasta headers	Number of proteins	Peptides	Razor + unique peptides	Unique peptides	Peptides -UV1	Peptides -UV2	Peptides -UV3	Peptides +UV1	Peptides +UV2	Peptides +UV3	Razor + unique peptides -UV1	Razor + unique peptides -UV2	Razor + unique peptides -UV3	Razor + unique peptides +UV1	Razor + unique peptides +UV2	Razor + unique peptides +UV3	Unique peptides -UV1	Unique peptides -UV2	Unique peptides -UV3	Unique peptides +UV1	Unique peptides +UV2	Unique peptides +UV3	Sequence coverage [%]	Unique + razor sequence coverage [%]	Unique sequence coverage [%]	Mol. weight [kDa]	Sequence length	Sequence lengths	Fraction average	Fraction 1	Fraction 2	Fraction 3	Fraction 4	Q-value	Identification type -UV1	Identification type -UV2	Identification type -UV3	Identification type +UV1	Identification type +UV2	Identification type +UV3	Sequence coverage -UV1 [%]	Sequence coverage -UV2 [%]	Sequence coverage -UV3 [%]	Sequence coverage +UV1 [%]
gi|311033477|sp|O15320.4|CTGE5_HUMAN;gi|1063797073|sp|Q96PC5.4|MIA2_HUMAN	gi|311033477|sp|O15320.4|CTGE5_HUMAN;gi|1063797073|sp|Q96PC5.4|MIA2_HUMAN	2;2	2;2	2;2	>gi|311033477|sp|O15320.4|CTGE5_HUMAN RecName: Full=cTAGE family member 5; Short=Protein cTAGE-5; AltName: Full=Meningioma-expressed antigen 6/11;>gi|1063797073|sp|Q96PC5.4|MIA2_HUMAN RecName: Full=Melanoma inhibitory activity protein 2; Flags: Precursor	2	2	2	2	0	0	0	2	1	1	0	0	0	2	1	1	0	0	0	2	1	1	2.2	2.2	2.2	90.995	804	804;1412	3			6		0	By matching	By matching	By matching	By MS/MS	By MS/MS	By matching	0	0	0	2.2
gi|10719946|sp|O75131.1|CPNE3_HUMAN;gi|33860150|sp|Q96FN4.3|CPNE2_HUMAN;gi|300669696|sp|Q8IYJ1.3|CPNE9_HUMAN;gi|67476948|sp|O95741.3|CPNE6_HUMAN;gi|26006702|sp|Q96A23.1|CPNE4_HUMAN;gi|115502379|sp|Q86YQ8.2|CPNE8_HUMAN;gi|13626179|sp|Q9HCH3.2|CPNE5_HUMAN;gi|10719954|sp|Q9UBL6.1|CPNE7_HUMAN	gi|10719946|sp|O75131.1|CPNE3_HUMAN	11;1;1;1;1;1;1;1	11;1;1;1;1;1;1;1	11;1;1;1;1;1;1;1	>gi|10719946|sp|O75131.1|CPNE3_HUMAN RecName: Full=Copine-3; AltName: Full=Copine III	8	11	11	11	0	0	2	11	10	11	0	0	2	11	10	11	0	0	2	11	10	11	22.3	22.3	22.3	60.13	537	537;548;553;557;557;564;593;633	2.18	3	40		6	0	By matching	By matching	By matching	By MS/MS	By MS/MS	By MS/MS	0	0	5.2	22.3
gi|10719953|sp|Q99829.1|CPNE1_HUMAN	gi|10719953|sp|Q99829.1|CPNE1_HUMAN	6	6	6	>gi|10719953|sp|Q99829.1|CPNE1_HUMAN RecName: Full=Copine-1; AltName: Full=Chromobindin 17; AltName: Full=Copine I	1	6	6	6	1	1	0	5	6	5	1	1	0	5	6	5	1	1	0	5	6	5	16.9	16.9	16.9	59.058	537	537	2.12		22	1	1	0	By matching	By matching	By matching	By MS/MS	By MS/MS	By MS/MS	2	2	0	11
gi|10720082|sp|Q9Y4Z0.1|LSM4_HUMAN	gi|10720082|sp|Q9Y4Z0.1|LSM4_HUMAN	1	1	1	>gi|10720082|sp|Q9Y4Z0.1|LSM4_HUMAN RecName: Full=U6 snRNA-associated Sm-like protein LSm4; AltName: Full=Glycine-rich protein; Short=GRP	1	1	1	1	0	0	0	1	1	1	0	0	0	1	1	1	0	0	0	1	1	1	11.5	11.5	11.5	15.35	139	139	1	3				1	By matching	By matching	By matching	By MS/MS	By matching	By matching	0	0	0	11.5
gi|10720179|sp|O75688.1|PPM1B_HUMAN	gi|10720179|sp|O75688.1|PPM1B_HUMAN	2	2	1	>gi|10720179|sp|O75688.1|PPM1B_HUMAN RecName: Full=Protein phosphatase 1B; AltName: Full=Protein phosphatase 2C isoform beta; Short=PP2C-beta	1	2	2	1	1	0	1	1	1	2	1	0	1	1	1	2	1	0	0	1	1	1	5.2	5.2	2.7	52.642	479	479	2.33	1	3	1	1	0	By matching	By matching	By matching	By MS/MS	By matching	By MS/MS	2.7	0	2.5	2.7
gi|10720185|sp|Q9Y4L1.1|HYOU1_HUMAN	gi|10720185|sp|Q9Y4L1.1|HYOU1_HUMAN	14	14	14	>gi|10720185|sp|Q9Y4L1.1|HYOU1_HUMAN RecName: Full=Hypoxia up-regulated protein 1; AltName: Full=150 kDa oxygen-regulated protein; Short=ORP-150; AltName: Full=170 kDa glucose-regulated protein; Short=GRP-170; Flags: Precursor	1	14	14	14	1	2	0	14	13	14	1	2	0	14	13	14	1	2	0	14	13	14	17.3	17.3	17.3	111.33	999	999	2.97		3	56	1	0	By matching	By matching	By matching	By MS/MS	By MS/MS	By MS/MS	1	2.7	0	17.3
gi|10720244|sp|Q9Y5S9.1|RBM8A_HUMAN	gi|10720244|sp|Q9Y5S9.1|RBM8A_HUMAN	1	1	1	>gi|10720244|sp|Q9Y5S9.1|RBM8A_HUMAN RecName: Full=RNA-binding protein 8A; AltName: Full=Binder of OVCA1-1; Short=BOV-1; AltName: Full=RNA-binding motif protein 8A; AltName: Full=RNA-binding protein Y14; AltName: Full=Ribonucleoprotein RBM8A	1	1	1	1	0	0	0	1	1	1	0	0	0	1	1	1	0	0	0	1	1	1	10.9	10.9	10.9	19.889	174	174	1	6				0	By matching	By matching	By matching	By MS/MS	By MS/MS	By MS/MS	0	0	0	10.9
gi|10720282|sp|O95219.1|SNX4_HUMAN	gi|10720282|sp|O95219.1|SNX4_HUMAN	1	1	1	>gi|10720282|sp|O95219.1|SNX4_HUMAN RecName: Full=Sorting nexin-4	1	1	1	1	0	0	0	1	1	1	0	0	0	1	1	1	0	0	0	1	1	1	3.1	3.1	3.1	51.908	450	450	4				3	0	By matching	By matching	By matching	By MS/MS	By MS/MS	By MS/MS	0	0	0	3.1
gi|10720285|sp|Q9UNH7.1|SNX6_HUMAN	gi|10720285|sp|Q9UNH7.1|SNX6_HUMAN	4	4	4	>gi|10720285|sp|Q9UNH7.1|SNX6_HUMAN RecName: Full=Sorting nexin-6; AltName: Full=TRAF4-associated factor 2; Contains: RecName: Full=Sorting nexin-6, N-terminally processed	1	4	4	4	0	0	0	4	3	3	0	0	0	4	3	3	0	0	0	4	3	3	13.5	13.5	13.5	46.648	406	406	3.6		2		8	0	By matching	By matching	By matching	By MS/MS	By MS/MS	By MS/MS	0	0	0	13.5
gi|10720289|sp|Q9Y5X3.1|SNX5_HUMAN	gi|10720289|sp|Q9Y5X3.1|SNX5_HUMAN	1	1	1	>gi|10720289|sp|Q9Y5X3.1|SNX5_HUMAN RecName: Full=Sorting nexin-5	1	1	1	1	0	0	0	0	0	1	0	0	0	0	0	1	0	0	0	0	0	1	4.2	4.2	4.2	46.816	404	404	2		1			1	By matching	By matching	By matching	By matching	By matching	By MS/MS	0	0	0	0
gi|10720303|sp|Q15750.1|TAB1_HUMAN	gi|10720303|sp|Q15750.1|TAB1_HUMAN	2	2	2	>gi|10720303|sp|Q15750.1|TAB1_HUMAN RecName: Full=TGF-beta-activated kinase 1 and MAP3K7-binding protein 1; AltName: Full=Mitogen-activated protein kinase kinase kinase 7-interacting protein 1; AltName: Full=TGF-beta-activated kinase 1-binding protein 1; S	1	2	2	2	0	0	0	1	1	2	0	0	0	1	1	2	0	0	0	1	1	2	5.2	5.2	5.2	54.643	504	504	2		4			0	By matching	By matching	By matching	By MS/MS	By matching	By MS/MS	0	0	0	2.6
gi|1074718565|sp|P01742.2|HV169_HUMAN;gi|1074718553|sp|P01743.2|HV146_HUMAN	gi|1074718565|sp|P01742.2|HV169_HUMAN;gi|1074718553|sp|P01743.2|HV146_HUMAN	1;1	1;1	1;1	>gi|1074718565|sp|P01742.2|HV169_HUMAN RecName: Full=Immunoglobulin heavy variable 1-69; AltName: Full=Ig heavy chain V-I region EU; AltName: Full=Ig heavy chain V-I region SIE; AltName: Full=Ig heavy chain V-I region WOL; Flags: Precursor;>gi|1074718553|s	2	1	1	1	1	1	1	1	1	1	1	1	1	1	1	1	1	1	1	1	1	1	9.4	9.4	9.4	12.659	117	117;117	3.57	1			6	0	By matching	By MS/MS	By MS/MS	By matching	By matching	By matching	9.4	9.4	9.4	9.4
gi|1074718640|sp|P01763.2|HV348_HUMAN;gi|123860|sp|P01781.1|HV320_HUMAN;gi|1074718611|sp|P01766.2|HV313_HUMAN;gi|1074718645|sp|P01767.2|HV353_HUMAN;gi|1074718632|sp|P01772.2|HV333_HUMAN	gi|1074718640|sp|P01763.2|HV348_HUMAN;gi|123860|sp|P01781.1|HV320_HUMAN;gi|1074718611|sp|P01766.2|HV313_HUMAN;gi|1074718645|sp|P01767.2|HV353_HUMAN;gi|1074718632|sp|P01772.2|HV333_HUMAN	2;1;1;1;1	2;1;1;1;1	2;1;1;1;1	>gi|1074718640|sp|P01763.2|HV348_HUMAN RecName: Full=Immunoglobulin heavy variable 3-48; AltName: Full=Ig heavy chain V-III region WEA; Flags: Precursor;>gi|123860|sp|P01781.1|HV320_HUMAN RecName: Full=Ig heavy chain V-III region GAL;>gi|1074718611|sp|P017	5	2	2	2	0	0	2	2	1	1	0	0	2	2	1	1	0	0	2	2	1	1	18.8	18.8	18.8	12.812	117	117;116;116;116;117	1.5	3	3			0	By matching	By matching	By MS/MS	By matching	By matching	By matching	0	0	18.8	18.8
gi|108860798|sp|Q8IXI1.2|MIRO2_HUMAN;gi|108860796|sp|Q8IXI2.2|MIRO1_HUMAN	gi|108860798|sp|Q8IXI1.2|MIRO2_HUMAN	4;1	4;1	4;1	>gi|108860798|sp|Q8IXI1.2|MIRO2_HUMAN RecName: Full=Mitochondrial Rho GTPase 2; Short=MIRO-2; Short=hMiro-2; AltName: Full=Ras homolog gene family member T2	2	4	4	4	0	0	0	3	4	3	0	0	0	3	4	3	0	0	0	3	4	3	8.4	8.4	8.4	68.117	618	618;618	2.09		10	1		0	By matching	By matching	By matching	By MS/MS	By MS/MS	By MS/MS	0	0	0	6.6
gi|74725006|sp|Q9GZM8.1|NDEL1_HUMAN;gi|108860813|sp|Q9NXR1.2|NDE1_HUMAN	gi|74725006|sp|Q9GZM8.1|NDEL1_HUMAN;gi|108860813|sp|Q9NXR1.2|NDE1_HUMAN	1;1	1;1	1;1	>gi|74725006|sp|Q9GZM8.1|NDEL1_HUMAN RecName: Full=Nuclear distribution protein nudE-like 1; Short=Protein Nudel; AltName: Full=Mitosin-associated protein 1;>gi|108860813|sp|Q9NXR1.2|NDE1_HUMAN RecName: Full=Nuclear distribution protein nudE homolog 1; Sho	2	1	1	1	0	0	0	1	1	1	0	0	0	1	1	1	0	0	0	1	1	1	3.2	3.2	3.2	38.374	345	345;346	2		3			0.0057424	By matching	By matching	By matching	By MS/MS	By matching	By matching	0	0	0	3.2
gi|108860974|sp|O75817.2|POP7_HUMAN	gi|108860974|sp|O75817.2|POP7_HUMAN	1	1	1	>gi|108860974|sp|O75817.2|POP7_HUMAN RecName: Full=Ribonuclease P protein subunit p20; Short=RNaseP protein p20; AltName: Full=Ribonucleases P/MRP protein subunit POP7 homolog; Short=hPOP7	1	1	1	1	0	0	0	1	1	1	0	0	0	1	1	1	0	0	0	1	1	1	10.7	10.7	10.7	15.651	140	140	1.25	3	1			0.0097694	By matching	By matching	By matching	By matching	By MS/MS	By matching	0	0	0	10.7
gi|108861983|sp|Q96RQ3.3|MCCA_HUMAN	gi|108861983|sp|Q96RQ3.3|MCCA_HUMAN	2	2	2	>gi|108861983|sp|Q96RQ3.3|MCCA_HUMAN RecName: Full=Methylcrotonoyl-CoA carboxylase subunit alpha, mitochondrial; Short=MCCase subunit alpha; AltName: Full=3-methylcrotonyl-CoA carboxylase 1; AltName: Full=3-methylcrotonyl-CoA carboxylase biotin-containing	1	2	2	2	0	0	0	2	2	1	0	0	0	2	2	1	0	0	0	2	2	1	3.6	3.6	3.6	80.472	725	725	2		5			0	By matching	By matching	By matching	By MS/MS	By MS/MS	By MS/MS	0	0	0	3.6
gi|108862045|sp|O43592.2|XPOT_HUMAN	gi|108862045|sp|O43592.2|XPOT_HUMAN	14	14	14	>gi|108862045|sp|O43592.2|XPOT_HUMAN RecName: Full=Exportin-T; AltName: Full=Exportin(tRNA); AltName: Full=tRNA exportin	1	14	14	14	0	0	1	14	12	11	0	0	1	14	12	11	0	0	1	14	12	11	18.9	18.9	18.9	109.96	962	962	2.88		5	36		0	By matching	By matching	By matching	By MS/MS	By MS/MS	By MS/MS	0	0	1.2	18.9
gi|108935845|sp|P07910.4|HNRPC_HUMAN;gi|694016549|sp|B2RXH8.1|HNRC2_HUMAN	gi|108935845|sp|P07910.4|HNRPC_HUMAN;gi|694016549|sp|B2RXH8.1|HNRC2_HUMAN	8;4	8;4	4;0	>gi|108935845|sp|P07910.4|HNRPC_HUMAN RecName: Full=Heterogeneous nuclear ribonucleoproteins C1/C2; Short=hnRNP C1/C2;>gi|694016549|sp|B2RXH8.1|HNRC2_HUMAN RecName: Full=Heterogeneous nuclear ribonucleoprotein C-like 2; Short=hnRNP C-like-2	2	8	8	4	4	1	4	8	8	8	4	1	4	8	8	8	3	0	3	4	4	4	26.5	26.5	15.4	33.67	306	306;293	2.24	11	34	17	5	0	By MS/MS	By matching	By MS/MS	By MS/MS	By MS/MS	By MS/MS	15.7	3.9	16.3	26.5
gi|108935853|sp|Q14149.3|MORC3_HUMAN	gi|108935853|sp|Q14149.3|MORC3_HUMAN	2	2	2	>gi|108935853|sp|Q14149.3|MORC3_HUMAN RecName: Full=MORC family CW-type zinc finger protein 3; AltName: Full=Nuclear matrix protein 2; AltName: Full=Zinc finger CW-type coiled-coil domain protein 3	1	2	2	2	0	0	0	2	2	1	0	0	0	2	2	1	0	0	0	2	2	1	4.5	4.5	4.5	107.11	939	939	3			5		0	By matching	By matching	By matching	By MS/MS	By MS/MS	By MS/MS	0	0	0	4.5
gi|108935868|sp|Q9Y263.2|PLAP_HUMAN	gi|108935868|sp|Q9Y263.2|PLAP_HUMAN	10	10	10	>gi|108935868|sp|Q9Y263.2|PLAP_HUMAN RecName: Full=Phospholipase A-2-activating protein; Short=PLA2P; Short=PLAP	1	10	10	10	2	1	1	10	7	8	2	1	1	10	7	8	2	1	1	10	7	8	19.1	19.1	19.1	87.156	795	795	2.43	6	26	4	11	0	By matching	By matching	By matching	By MS/MS	By MS/MS	By MS/MS	3.6	1.5	1.5	19.1
gi|108935884|sp|Q9H1K0.2|RBNS5_HUMAN	gi|108935884|sp|Q9H1K0.2|RBNS5_HUMAN	4	4	4	>gi|108935884|sp|Q9H1K0.2|RBNS5_HUMAN RecName: Full=Rabenosyn-5; AltName: Full=110 kDa protein; AltName: Full=FYVE finger-containing Rab5 effector protein rabenosyn-5; AltName: Full=RAB effector RBSN; AltName: Full=Zinc finger FYVE domain-containing protei	1	4	4	4	0	0	0	3	4	2	0	0	0	3	4	2	0	0	0	3	4	2	6.9	6.9	6.9	88.869	784	784	3			9		0	By matching	By matching	By matching	By MS/MS	By MS/MS	By MS/MS	0	0	0	5.2
gi|108935929|sp|P00491.2|PNPH_HUMAN	gi|108935929|sp|P00491.2|PNPH_HUMAN	5	5	5	>gi|108935929|sp|P00491.2|PNPH_HUMAN RecName: Full=Purine nucleoside phosphorylase; Short=PNP; AltName: Full=Inosine phosphorylase; AltName: Full=Inosine-guanosine phosphorylase	1	5	5	5	0	0	0	4	5	4	0	0	0	4	5	4	0	0	0	4	5	4	21.1	21.1	21.1	32.118	289	289	1	13				0	By matching	By matching	By matching	By MS/MS	By MS/MS	By MS/MS	0	0	0	17.6
gi|108935939|sp|P02786.2|TFR1_HUMAN	gi|108935939|sp|P02786.2|TFR1_HUMAN	5	5	5	>gi|108935939|sp|P02786.2|TFR1_HUMAN RecName: Full=Transferrin receptor protein 1; Short=TR; Short=TfR; Short=TfR1; Short=Trfr; AltName: Full=T9; AltName: Full=p90; AltName: CD_antigen=CD71; Contains: RecName: Full=Transferrin receptor protein 1, serum for	1	5	5	5	0	0	0	5	4	4	0	0	0	5	4	4	0	0	0	5	4	4	8.2	8.2	8.2	84.87	760	760	2.13		13	2		0	By matching	By matching	By matching	By MS/MS	By MS/MS	By MS/MS	0	0	0	8.2
gi|108936017|sp|O14773.2|TPP1_HUMAN	gi|108936017|sp|O14773.2|TPP1_HUMAN	1	1	1	>gi|108936017|sp|O14773.2|TPP1_HUMAN RecName: Full=Tripeptidyl-peptidase 1; Short=TPP-1; AltName: Full=Cell growth-inhibiting gene 1 protein; AltName: Full=Lysosomal pepstatin-insensitive protease; Short=LPIC; AltName: Full=Tripeptidyl aminopeptidase; AltN	1	1	1	1	0	0	0	1	1	1	0	0	0	1	1	1	0	0	0	1	1	1	2.5	2.5	2.5	61.247	563	563	2		3			0.00044863	By matching	By matching	By matching	By MS/MS	By MS/MS	By matching	0	0	0	2.5
gi|108936023|sp|Q9Y5K5.3|UCHL5_HUMAN	gi|108936023|sp|Q9Y5K5.3|UCHL5_HUMAN	2	2	2	>gi|108936023|sp|Q9Y5K5.3|UCHL5_HUMAN RecName: Full=Ubiquitin carboxyl-terminal hydrolase isozyme L5; Short=UCH-L5; AltName: Full=Ubiquitin C-terminal hydrolase UCH37; AltName: Full=Ubiquitin thioesterase L5	1	2	2	2	0	0	0	2	2	2	0	0	0	2	2	2	0	0	0	2	2	2	6.7	6.7	6.7	37.606	329	329	2	1	7	1		0	By matching	By matching	By matching	By MS/MS	By MS/MS	By MS/MS	0	0	0	6.7
gi|109826957|sp|Q3B7T1.1|EDRF1_HUMAN	gi|109826957|sp|Q3B7T1.1|EDRF1_HUMAN	1	1	1	>gi|109826957|sp|Q3B7T1.1|EDRF1_HUMAN RecName: Full=Erythroid differentiation-related factor 1	1	1	1	1	0	0	0	1	1	1	0	0	0	1	1	1	0	0	0	1	1	1	1.7	1.7	1.7	138.53	1238	1238	3			3		0.001716	By matching	By matching	By matching	By matching	By MS/MS	By MS/MS	0	0	0	1.7
gi|109940042|sp|Q14157.2|UBP2L_HUMAN	gi|109940042|sp|Q14157.2|UBP2L_HUMAN	7	7	7	>gi|109940042|sp|Q14157.2|UBP2L_HUMAN RecName: Full=Ubiquitin-associated protein 2-like; AltName: Full=Protein NICE-4	1	7	7	7	0	0	0	7	7	7	0	0	0	7	7	7	0	0	0	7	7	7	11.5	11.5	11.5	114.53	1087	1087	2.76		7	22		0	By matching	By matching	By matching	By MS/MS	By MS/MS	By MS/MS	0	0	0	11.5
gi|110278938|sp|Q7Z478.2|DHX29_HUMAN	gi|110278938|sp|Q7Z478.2|DHX29_HUMAN	3	2	2	>gi|110278938|sp|Q7Z478.2|DHX29_HUMAN RecName: Full=ATP-dependent RNA helicase DHX29; AltName: Full=DEAH box protein 29; AltName: Full=Nucleic acid helicase DDXx	1	3	2	2	0	0	0	3	3	2	0	0	0	2	2	1	0	0	0	2	2	1	3.1	2.3	2.3	155.23	1369	1369	2.43	1	2	4		0	By matching	By matching	By matching	By MS/MS	By MS/MS	By MS/MS	0	0	0	3.1
gi|110282993|sp|Q96T51.2|RUFY1_HUMAN	gi|110282993|sp|Q96T51.2|RUFY1_HUMAN	11	11	11	>gi|110282993|sp|Q96T51.2|RUFY1_HUMAN RecName: Full=RUN and FYVE domain-containing protein 1; AltName: Full=FYVE-finger protein EIP1; AltName: Full=La-binding protein 1; AltName: Full=Rab4-interacting protein; AltName: Full=Zinc finger FYVE domain-containi	1	11	11	11	0	0	0	6	6	9	0	0	0	6	6	9	0	0	0	6	6	9	20.6	20.6	20.6	79.817	708	708	2.28	1	20	7	1	0	By matching	By matching	By matching	By MS/MS	By MS/MS	By MS/MS	0	0	0	12.6
gi|110287684|sp|Q8NI08.2|NCOA7_HUMAN	gi|110287684|sp|Q8NI08.2|NCOA7_HUMAN	2	2	2	>gi|110287684|sp|Q8NI08.2|NCOA7_HUMAN RecName: Full=Nuclear receptor coactivator 7; AltName: Full=140 kDa estrogen receptor-associated protein; AltName: Full=Estrogen nuclear receptor coactivator 1	1	2	2	2	0	0	0	2	2	2	0	0	0	2	2	2	0	0	0	2	2	2	4.2	4.2	4.2	106.16	942	942	3			6		0.00044683	By matching	By matching	By matching	By MS/MS	By MS/MS	By MS/MS	0	0	0	4.2
gi|110288083|sp|Q6FIF0.2|ZFAN6_HUMAN	gi|110288083|sp|Q6FIF0.2|ZFAN6_HUMAN	1	1	1	>gi|110288083|sp|Q6FIF0.2|ZFAN6_HUMAN RecName: Full=AN1-type zinc finger protein 6; AltName: Full=Associated with PRK1 protein; AltName: Full=Zinc finger A20 domain-containing protein 3	1	1	1	1	0	0	0	1	1	1	0	0	0	1	1	1	0	0	0	1	1	1	12	12	12	22.555	208	208	1	3				0	By matching	By matching	By matching	By MS/MS	By MS/MS	By MS/MS	0	0	0	12
gi|110808199|sp|Q9NVH1.2|DJC11_HUMAN	gi|110808199|sp|Q9NVH1.2|DJC11_HUMAN	3	3	3	>gi|110808199|sp|Q9NVH1.2|DJC11_HUMAN RecName: Full=DnaJ homolog subfamily C member 11	1	3	3	3	0	0	0	2	3	1	0	0	0	2	3	1	0	0	0	2	3	1	9.1	9.1	9.1	63.277	559	559	2.14		6	1		0	By matching	By matching	By matching	By MS/MS	By MS/MS	By matching	0	0	0	6.4
gi|110808212|sp|Q96G46.2|DUS3L_HUMAN	gi|110808212|sp|Q96G46.2|DUS3L_HUMAN	1	1	1	>gi|110808212|sp|Q96G46.2|DUS3L_HUMAN RecName: Full=tRNA-dihydrouridine(47) synthase [NAD(P)(+)]-like; AltName: Full=tRNA-dihydrouridine synthase 3-like	1	1	1	1	0	0	0	1	1	1	0	0	0	1	1	1	0	0	0	1	1	1	3.4	3.4	3.4	72.593	650	650	2.17		5	1		0	By matching	By matching	By matching	By MS/MS	By MS/MS	By matching	0	0	0	3.4
gi|110815902|sp|Q8NF37.2|PCAT1_HUMAN	gi|110815902|sp|Q8NF37.2|PCAT1_HUMAN	3	3	3	>gi|110815902|sp|Q8NF37.2|PCAT1_HUMAN RecName: Full=Lysophosphatidylcholine acyltransferase 1; Short=LPC acyltransferase 1; Short=LPCAT-1; Short=LysoPC acyltransferase 1; AltName: Full=1-acylglycerophosphocholine O-acyltransferase; AltName: Full=1-alkylgly	1	3	3	3	0	1	1	1	3	1	0	1	1	1	3	1	0	1	1	1	3	1	6.6	6.6	6.6	59.151	534	534	2.1	4	3	1	2	0	By matching	By matching	By matching	By MS/MS	By MS/MS	By MS/MS	0	1.9	1.9	1.9
gi|110816482|sp|Q4G0F5.2|VP26B_HUMAN	gi|110816482|sp|Q4G0F5.2|VP26B_HUMAN	1	1	1	>gi|110816482|sp|Q4G0F5.2|VP26B_HUMAN RecName: Full=Vacuolar protein sorting-associated protein 26B; AltName: Full=Vesicle protein sorting 26B	1	1	1	1	0	0	0	1	0	0	0	0	0	1	0	0	0	0	0	1	0	0	3.3	3.3	3.3	39.154	336	336	2		1			0.0025295	By matching	By matching	By matching	By MS/MS	By matching	By matching	0	0	0	3.3
gi|110826413|sp|O60749.2|SNX2_HUMAN	gi|110826413|sp|O60749.2|SNX2_HUMAN	4	3	3	>gi|110826413|sp|O60749.2|SNX2_HUMAN RecName: Full=Sorting nexin-2; AltName: Full=Transformation-related gene 9 protein; Short=TRG-9	1	4	3	3	1	1	0	3	4	4	1	1	0	3	3	3	1	1	0	3	3	3	9.6	7.5	7.5	58.47	519	519	2		12			0	By matching	By matching	By matching	By MS/MS	By MS/MS	By MS/MS	2.7	2.7	0	7.5
gi|112690|sp|P27348.1|1433T_HUMAN	gi|112690|sp|P27348.1|1433T_HUMAN	14	14	12	>gi|112690|sp|P27348.1|1433T_HUMAN RecName: Full=14-3-3 protein theta; AltName: Full=14-3-3 protein T-cell; AltName: Full=14-3-3 protein tau; AltName: Full=Protein HS1	1	14	14	12	2	2	3	14	11	14	2	2	3	14	11	14	2	2	2	12	9	12	58.8	58.8	55.5	27.764	245	245	1.87	46	9	6	15	0	By MS/MS	By MS/MS	By MS/MS	By MS/MS	By MS/MS	By MS/MS	10.6	10.6	12.7	58.8
gi|112907|sp|P08697.3|A2AP_HUMAN	gi|112907|sp|P08697.3|A2AP_HUMAN	2	2	2	>gi|112907|sp|P08697.3|A2AP_HUMAN RecName: Full=Alpha-2-antiplasmin; Short=Alpha-2-AP; AltName: Full=Alpha-2-plasmin inhibitor; Short=Alpha-2-PI; AltName: Full=Serpin F2; Flags: Precursor	1	2	2	2	0	0	2	0	0	0	0	0	2	0	0	0	0	0	2	0	0	0	6.1	6.1	6.1	54.565	491	491	1	2				0	By matching	By matching	By MS/MS	By matching	By matching	By matching	0	0	6.1	0
gi|113017|sp|P11310.1|ACADM_HUMAN	gi|113017|sp|P11310.1|ACADM_HUMAN	8	8	8	>gi|113017|sp|P11310.1|ACADM_HUMAN RecName: Full=Medium-chain specific acyl-CoA dehydrogenase, mitochondrial; Short=MCAD; Flags: Precursor	1	8	8	8	0	1	0	6	6	8	0	1	0	6	6	8	0	1	0	6	6	8	26.4	26.4	26.4	46.588	421	421	1.93	3	23	1		0	By matching	By matching	By matching	By MS/MS	By MS/MS	By MS/MS	0	3.6	0	20.9
gi|113408|sp|P11766.4|ADHX_HUMAN	gi|113408|sp|P11766.4|ADHX_HUMAN	3	3	3	>gi|113408|sp|P11766.4|ADHX_HUMAN RecName: Full=Alcohol dehydrogenase class-3; AltName: Full=Alcohol dehydrogenase 5; AltName: Full=Alcohol dehydrogenase class chi chain; AltName: Full=Alcohol dehydrogenase class-III; AltName: Full=Glutathione-dependent fo	1	3	3	3	0	0	0	2	2	2	0	0	0	2	2	2	0	0	0	2	2	2	12.8	12.8	12.8	39.724	374	374	2		6			0	By matching	By matching	By matching	By MS/MS	By matching	By MS/MS	0	0	0	10.2
gi|113455|sp|P12235.4|ADT1_HUMAN	gi|113455|sp|P12235.4|ADT1_HUMAN	8	2	2	>gi|113455|sp|P12235.4|ADT1_HUMAN RecName: Full=ADP/ATP translocase 1; AltName: Full=ADP,ATP carrier protein 1; AltName: Full=ADP,ATP carrier protein, heart/skeletal muscle isoform T1; AltName: Full=Adenine nucleotide translocator 1; Short=ANT 1; AltName:	1	8	2	2	1	0	3	5	7	6	0	0	0	1	2	1	0	0	0	1	2	1	27.2	7.4	7.4	33.064	298	298	1	4				1	By matching	By matching	By matching	By matching	By MS/MS	By matching	3.7	0	10.1	15.4
gi|113463|sp|P12236.4|ADT3_HUMAN	gi|113463|sp|P12236.4|ADT3_HUMAN	12	12	4	>gi|113463|sp|P12236.4|ADT3_HUMAN RecName: Full=ADP/ATP translocase 3; AltName: Full=ADP,ATP carrier protein 3; AltName: Full=ADP,ATP carrier protein, isoform T2; Short=ANT 2; AltName: Full=Adenine nucleotide translocator 3; Short=ANT 3; AltName: Full=Solu	1	12	12	4	1	1	7	10	11	10	1	1	7	10	11	10	0	1	2	4	4	3	38.3	38.3	12.8	32.866	298	298	1.71	52	14	15	6	0	By matching	By matching	By MS/MS	By MS/MS	By MS/MS	By MS/MS	3.7	3	23.2	30.9
gi|113499|sp|P06280.1|AGAL_HUMAN	gi|113499|sp|P06280.1|AGAL_HUMAN	1	1	1	>gi|113499|sp|P06280.1|AGAL_HUMAN RecName: Full=Alpha-galactosidase A; AltName: Full=Alpha-D-galactosidase A; AltName: Full=Alpha-D-galactoside galactohydrolase; AltName: Full=Melibiase; AltName: INN=Agalsidase; Flags: Precursor	1	1	1	1	0	0	0	1	1	1	0	0	0	1	1	1	0	0	0	1	1	1	4.2	4.2	4.2	48.766	429	429	2		3			0	By matching	By matching	By matching	By MS/MS	By MS/MS	By MS/MS	0	0	0	4.2
gi|113584|sp|P01876.2|IGHA1_HUMAN;gi|218512088|sp|P01877.3|IGHA2_HUMAN	gi|113584|sp|P01876.2|IGHA1_HUMAN	5;2	5;2	5;2	>gi|113584|sp|P01876.2|IGHA1_HUMAN RecName: Full=Ig alpha-1 chain C region	2	5	5	5	1	0	5	0	2	5	1	0	5	0	2	5	1	0	5	0	2	5	17.8	17.8	17.8	37.654	353	353;340	1.38	9	3	1		0	By matching	By matching	By MS/MS	By matching	By matching	By matching	4.2	0	17.8	0
gi|113606|sp|P04075.2|ALDOA_HUMAN;gi|113611|sp|P05062.2|ALDOB_HUMAN	gi|113606|sp|P04075.2|ALDOA_HUMAN	20;1	20;1	18;0	>gi|113606|sp|P04075.2|ALDOA_HUMAN RecName: Full=Fructose-bisphosphate aldolase A; AltName: Full=Lung cancer antigen NY-LU-1; AltName: Full=Muscle-type aldolase	2	20	20	18	5	5	7	20	20	19	5	5	7	20	20	19	5	5	7	18	18	17	60.7	60.7	51.1	39.42	364	364;364	1.99	20	86	11	4	0	By MS/MS	By MS/MS	By MS/MS	By MS/MS	By MS/MS	By MS/MS	14	11	20.6	60.7
gi|113613|sp|P09972.2|ALDOC_HUMAN	gi|113613|sp|P09972.2|ALDOC_HUMAN	4	2	2	>gi|113613|sp|P09972.2|ALDOC_HUMAN RecName: Full=Fructose-bisphosphate aldolase C; AltName: Full=Brain-type aldolase	1	4	2	2	0	0	0	4	4	4	0	0	0	2	2	2	0	0	0	2	2	2	16.8	7.1	7.1	39.455	364	364	1.92	1	12			0	By matching	By matching	By matching	By MS/MS	By MS/MS	By MS/MS	0	0	0	16.8
gi|11387251|sp|O43264.3|ZW10_HUMAN	gi|11387251|sp|O43264.3|ZW10_HUMAN	3	3	3	>gi|11387251|sp|O43264.3|ZW10_HUMAN RecName: Full=Centromere/kinetochore protein zw10 homolog	1	3	3	3	0	0	0	3	3	2	0	0	0	3	3	2	0	0	0	3	3	2	5.3	5.3	5.3	88.828	779	779	2		8			0	By matching	By matching	By matching	By MS/MS	By MS/MS	By MS/MS	0	0	0	5.3
gi|113880|sp|P01019.1|ANGT_HUMAN	gi|113880|sp|P01019.1|ANGT_HUMAN	1	1	1	>gi|113880|sp|P01019.1|ANGT_HUMAN RecName: Full=Angiotensinogen; AltName: Full=Serpin A8; Contains: RecName: Full=Angiotensin-1; AltName: Full=Angiotensin 1-10; AltName: Full=Angiotensin I; Short=Ang I; Contains: RecName: Full=Angiotensin-2; AltName: Full=	1	1	1	1	0	0	1	0	1	0	0	0	1	0	1	0	0	0	1	0	1	0	2.5	2.5	2.5	53.154	485	485	1	2				0	By matching	By matching	By MS/MS	By matching	By matching	By matching	0	0	2.5	0
gi|113944|sp|P04083.2|ANXA1_HUMAN	gi|113944|sp|P04083.2|ANXA1_HUMAN	5	5	5	>gi|113944|sp|P04083.2|ANXA1_HUMAN RecName: Full=Annexin A1; AltName: Full=Annexin I; AltName: Full=Annexin-1; AltName: Full=Calpactin II; AltName: Full=Calpactin-2; AltName: Full=Chromobindin-9; AltName: Full=Lipocortin I; AltName: Full=Phospholipase A2 i	1	5	5	5	3	0	5	1	2	1	3	0	5	1	2	1	3	0	5	1	2	1	16.5	16.5	16.5	38.714	346	346	1.69	8	2	2	1	0	By MS/MS	By matching	By MS/MS	By matching	By matching	By matching	11.8	0	16.5	3.2
gi|113950|sp|P07355.2|ANXA2_HUMAN;gi|205830271|sp|A6NMY6.2|AXA2L_HUMAN	gi|113950|sp|P07355.2|ANXA2_HUMAN;gi|205830271|sp|A6NMY6.2|AXA2L_HUMAN	21;15	21;15	21;15	>gi|113950|sp|P07355.2|ANXA2_HUMAN RecName: Full=Annexin A2; AltName: Full=Annexin II; AltName: Full=Annexin-2; AltName: Full=Calpactin I heavy chain; AltName: Full=Calpactin-1 heavy chain; AltName: Full=Chromobindin-8; AltName: Full=Lipocortin II; AltName	2	21	21	21	6	3	14	19	21	18	6	3	14	19	21	18	6	3	14	19	21	18	63.7	63.7	63.7	38.604	339	339;339	1.95	45	82	13	12	0	By MS/MS	By MS/MS	By MS/MS	By MS/MS	By MS/MS	By MS/MS	18.6	8.8	47.2	61.1
gi|113960|sp|P08758.2|ANXA5_HUMAN	gi|113960|sp|P08758.2|ANXA5_HUMAN	5	5	5	>gi|113960|sp|P08758.2|ANXA5_HUMAN RecName: Full=Annexin A5; AltName: Full=Anchorin CII; AltName: Full=Annexin V; AltName: Full=Annexin-5; AltName: Full=Calphobindin I; Short=CBP-I; AltName: Full=Endonexin II; AltName: Full=Lipocortin V; AltName: Full=Plac	1	5	5	5	0	0	1	5	5	5	0	0	1	5	5	5	0	0	1	5	5	5	18.1	18.1	18.1	35.936	320	320	1.06	17	1			0	By matching	By matching	By matching	By MS/MS	By MS/MS	By MS/MS	0	0	5	18.1
gi|113962|sp|P08133.3|ANXA6_HUMAN	gi|113962|sp|P08133.3|ANXA6_HUMAN	17	17	17	>gi|113962|sp|P08133.3|ANXA6_HUMAN RecName: Full=Annexin A6; AltName: Full=67 kDa calelectrin; AltName: Full=Annexin VI; AltName: Full=Annexin-6; AltName: Full=Calphobindin-II; Short=CPB-II; AltName: Full=Chromobindin-20; AltName: Full=Lipocortin VI; AltNa	1	17	17	17	1	0	0	14	17	13	1	0	0	14	17	13	1	0	0	14	17	13	34.3	34.3	34.3	75.872	673	673	1.98	1	51			0	By matching	By matching	By matching	By MS/MS	By MS/MS	By MS/MS	2.4	0	0	29.3
gi|113984|sp|P27695.2|APEX1_HUMAN	gi|113984|sp|P27695.2|APEX1_HUMAN	6	6	6	>gi|113984|sp|P27695.2|APEX1_HUMAN RecName: Full=DNA-(apurinic or apyrimidinic site) lyase; AltName: Full=APEX nuclease; Short=APEN; AltName: Full=Apurinic-apyrimidinic endonuclease 1; Short=AP endonuclease 1; Short=APE-1; AltName: Full=REF-1; AltName: Ful	1	6	6	6	3	0	1	5	6	5	3	0	1	5	6	5	3	0	1	5	6	5	25.8	25.8	25.8	35.554	318	318	2.04	3	20		2	0	By matching	By matching	By matching	By MS/MS	By MS/MS	By MS/MS	13.5	0	3.5	19.2
gi|113992|sp|P02647.1|APOA1_HUMAN	gi|113992|sp|P02647.1|APOA1_HUMAN	5	5	5	>gi|113992|sp|P02647.1|APOA1_HUMAN RecName: Full=Apolipoprotein A-I; Short=Apo-AI; Short=ApoA-I; AltName: Full=Apolipoprotein A1; Contains: RecName: Full=Proapolipoprotein A-I; Short=ProapoA-I; Contains: RecName: Full=Truncated apolipoprotein A-I; AltName:	1	5	5	5	0	0	5	0	0	0	0	0	5	0	0	0	0	0	5	0	0	0	21	21	21	30.777	267	267	1	5				0	By matching	By matching	By MS/MS	By matching	By matching	By matching	0	0	21	0
gi|114074|sp|P07741.2|APT_HUMAN	gi|114074|sp|P07741.2|APT_HUMAN	6	6	6	>gi|114074|sp|P07741.2|APT_HUMAN RecName: Full=Adenine phosphoribosyltransferase; Short=APRT	1	6	6	6	0	1	2	5	5	6	0	1	2	5	5	6	0	1	2	5	5	6	38.9	38.9	38.9	19.608	180	180	1.05	19	1			0	By matching	By matching	By matching	By MS/MS	By MS/MS	By MS/MS	0	6.1	13.3	33.3
gi|114123|sp|P18085.3|ARF4_HUMAN	gi|114123|sp|P18085.3|ARF4_HUMAN	1	1	1	>gi|114123|sp|P18085.3|ARF4_HUMAN RecName: Full=ADP-ribosylation factor 4	1	1	1	1	0	0	0	1	1	1	0	0	0	1	1	1	0	0	0	1	1	1	5.6	5.6	5.6	20.511	180	180	1.2	4	1			0	By matching	By matching	By matching	By MS/MS	By MS/MS	By MS/MS	0	0	0	5.6
gi|114149995|sp|Q32MZ4.2|LRRF1_HUMAN	gi|114149995|sp|Q32MZ4.2|LRRF1_HUMAN	14	14	14	>gi|114149995|sp|Q32MZ4.2|LRRF1_HUMAN RecName: Full=Leucine-rich repeat flightless-interacting protein 1; Short=LRR FLII-interacting protein 1; AltName: Full=GC-binding factor 2; AltName: Full=TAR RNA-interacting protein	1	14	14	14	2	3	2	13	14	14	2	3	2	13	14	14	2	3	2	13	14	14	25.5	25.5	25.5	89.252	808	808	2.92		5	56		0	By MS/MS	By MS/MS	By MS/MS	By MS/MS	By MS/MS	By MS/MS	4.1	3.8	3.7	20.4
gi|114150036|sp|Q3SYC2.2|MOGT2_HUMAN	gi|114150036|sp|Q3SYC2.2|MOGT2_HUMAN	1	1	1	>gi|114150036|sp|Q3SYC2.2|MOGT2_HUMAN RecName: Full=2-acylglycerol O-acyltransferase 2; AltName: Full=Acyl-CoA:monoacylglycerol acyltransferase 2; Short=MGAT2; Short=hMGAT2; AltName: Full=Diacylglycerol O-acyltransferase candidate 5; Short=hDC5; AltName: F	1	1	1	1	0	1	0	1	1	1	0	1	0	1	1	1	0	1	0	1	1	1	4.2	4.2	4.2	38.195	334	334	4				4	0.00044504	By matching	By matching	By matching	By MS/MS	By matching	By MS/MS	0	4.2	0	4.2
gi|114152793|sp|P26232.5|CTNA2_HUMAN	gi|114152793|sp|P26232.5|CTNA2_HUMAN	2	1	1	>gi|114152793|sp|P26232.5|CTNA2_HUMAN RecName: Full=Catenin alpha-2; AltName: Full=Alpha N-catenin; AltName: Full=Alpha-catenin-related protein	1	2	1	1	1	1	0	2	2	1	0	0	0	1	1	0	0	0	0	1	1	0	3.7	1.9	1.9	105.31	953	953	3			2		0.0029437	By matching	By matching	By matching	By matching	By MS/MS	By matching	1.8	1.8	0	3.7
gi|114152881|sp|Q13190.2|STX5_HUMAN	gi|114152881|sp|Q13190.2|STX5_HUMAN	1	1	1	>gi|114152881|sp|Q13190.2|STX5_HUMAN RecName: Full=Syntaxin-5	1	1	1	1	0	0	0	0	0	1	0	0	0	0	0	1	0	0	0	0	0	1	5.1	5.1	5.1	39.672	355	355	1	1				0.00044883	By matching	By matching	By matching	By matching	By matching	By MS/MS	0	0	0	0
gi|114152895|sp|Q9Y606.3|TRUA_HUMAN	gi|114152895|sp|Q9Y606.3|TRUA_HUMAN	4	4	4	>gi|114152895|sp|Q9Y606.3|TRUA_HUMAN RecName: Full=tRNA pseudouridine synthase A, mitochondrial; AltName: Full=tRNA pseudouridine(38-40) synthase; AltName: Full=tRNA pseudouridylate synthase I; AltName: Full=tRNA-uridine isomerase I; Flags: Precursor	1	4	4	4	0	0	0	2	3	2	0	0	0	2	3	2	0	0	0	2	3	2	9.8	9.8	9.8	47.47	427	427	2		7			0	By matching	By matching	By matching	By MS/MS	By MS/MS	By MS/MS	0	0	0	4.9
gi|114163|sp|P27540.1|ARNT_HUMAN	gi|114163|sp|P27540.1|ARNT_HUMAN	1	1	1	>gi|114163|sp|P27540.1|ARNT_HUMAN RecName: Full=Aryl hydrocarbon receptor nuclear translocator; Short=ARNT protein; AltName: Full=Class E basic helix-loop-helix protein 2; Short=bHLHe2; AltName: Full=Dioxin receptor, nuclear translocator; AltName: Full=Hyp	1	1	1	1	0	0	0	1	0	1	0	0	0	1	0	1	0	0	0	1	0	1	1.9	1.9	1.9	86.636	789	789	2		2			0.0046006	By matching	By matching	By matching	By matching	By matching	By MS/MS	0	0	0	1.9
gi|114312|sp|P16615.1|AT2A2_HUMAN;gi|12643544|sp|O14983.1|AT2A1_HUMAN;gi|19864659|sp|Q93084.2|AT2A3_HUMAN	gi|114312|sp|P16615.1|AT2A2_HUMAN	17;6;4	17;6;4	17;6;4	>gi|114312|sp|P16615.1|AT2A2_HUMAN RecName: Full=Sarcoplasmic/endoplasmic reticulum calcium ATPase 2; Short=SERCA2; Short=SR Ca(2+)-ATPase 2; AltName: Full=Calcium pump 2; AltName: Full=Calcium-transporting ATPase sarcoplasmic reticulum type, slow twitch s	3	17	17	17	0	0	0	17	17	16	0	0	0	17	17	16	0	0	0	17	17	16	22.6	22.6	22.6	114.76	1042	1042;1001;1043	2.8		15	61		0	By matching	By matching	By matching	By MS/MS	By MS/MS	By MS/MS	0	0	0	22.6
gi|114374|sp|P05023.1|AT1A1_HUMAN	gi|114374|sp|P05023.1|AT1A1_HUMAN	27	27	12	>gi|114374|sp|P05023.1|AT1A1_HUMAN RecName: Full=Sodium/potassium-transporting ATPase subunit alpha-1; Short=Na(+)/K(+) ATPase alpha-1 subunit; AltName: Full=Sodium pump subunit alpha-1; Flags: Precursor	1	27	27	12	6	4	3	24	25	25	6	4	3	24	25	25	1	2	0	11	11	12	34.8	34.8	17.6	112.89	1023	1023	2.52	6	67	87	1	0	By MS/MS	By MS/MS	By MS/MS	By MS/MS	By MS/MS	By MS/MS	8.5	5.4	4.3	32.4
gi|114392|sp|P05026.1|AT1B1_HUMAN	gi|114392|sp|P05026.1|AT1B1_HUMAN	1	1	1	>gi|114392|sp|P05026.1|AT1B1_HUMAN RecName: Full=Sodium/potassium-transporting ATPase subunit beta-1; AltName: Full=Sodium/potassium-dependent ATPase subunit beta-1	1	1	1	1	0	0	0	1	1	1	0	0	0	1	1	1	0	0	0	1	1	1	3.6	3.6	3.6	35.061	303	303	3		3		3	0	By matching	By matching	By matching	By MS/MS	By MS/MS	By MS/MS	0	0	0	3.6
gi|114517|sp|P25705.1|ATPA_HUMAN	gi|114517|sp|P25705.1|ATPA_HUMAN	22	22	22	>gi|114517|sp|P25705.1|ATPA_HUMAN RecName: Full=ATP synthase subunit alpha, mitochondrial; Flags: Precursor	1	22	22	22	6	8	11	21	22	22	6	8	11	21	22	22	6	8	11	21	22	22	49.7	49.7	49.7	59.75	553	553	3.23	14	36	25	106	0	By MS/MS	By MS/MS	By MS/MS	By MS/MS	By MS/MS	By MS/MS	15.9	22.8	28.6	47.7
gi|114549|sp|P06576.3|ATPB_HUMAN	gi|114549|sp|P06576.3|ATPB_HUMAN	26	26	26	>gi|114549|sp|P06576.3|ATPB_HUMAN RecName: Full=ATP synthase subunit beta, mitochondrial; Flags: Precursor	1	26	26	26	10	9	8	26	24	25	10	9	8	26	24	25	10	9	8	26	24	25	71.8	71.8	71.8	56.559	529	529	3.75	6	6	7	132	0	By MS/MS	By MS/MS	By MS/MS	By MS/MS	By MS/MS	By MS/MS	26.7	25.7	22.7	71.8
gi|114762|sp|P06748.2|NPM_HUMAN	gi|114762|sp|P06748.2|NPM_HUMAN	5	5	5	>gi|114762|sp|P06748.2|NPM_HUMAN RecName: Full=Nucleophosmin; Short=NPM; AltName: Full=Nucleolar phosphoprotein B23; AltName: Full=Nucleolar protein NO38; AltName: Full=Numatrin	1	5	5	5	0	0	0	5	5	5	0	0	0	5	5	5	0	0	0	5	5	5	32	32	32	32.575	294	294	2.11	8	21	4	4	0	By matching	By matching	By matching	By MS/MS	By MS/MS	By MS/MS	0	0	0	32
gi|115143|sp|P20290.1|BTF3_HUMAN	gi|115143|sp|P20290.1|BTF3_HUMAN	1	1	1	>gi|115143|sp|P20290.1|BTF3_HUMAN RecName: Full=Transcription factor BTF3; AltName: Full=Nascent polypeptide-associated complex subunit beta; Short=NAC-beta; AltName: Full=RNA polymerase B transcription factor 3	1	1	1	1	0	0	0	1	1	1	0	0	0	1	1	1	0	0	0	1	1	1	7.8	7.8	7.8	22.168	206	206	4				3	0	By matching	By matching	By matching	By matching	By MS/MS	By MS/MS	0	0	0	7.8
gi|115206|sp|P11586.3|C1TC_HUMAN	gi|115206|sp|P11586.3|C1TC_HUMAN	40	40	40	>gi|115206|sp|P11586.3|C1TC_HUMAN RecName: Full=C-1-tetrahydrofolate synthase, cytoplasmic; Short=C1-THF synthase; Includes: RecName: Full=Methylenetetrahydrofolate dehydrogenase; Includes: RecName: Full=Methenyltetrahydrofolate cyclohydrolase; Includes: R	1	40	40	40	5	2	3	36	39	37	5	2	3	36	39	37	5	2	3	36	39	37	49.8	49.8	49.8	101.56	935	935	2.88	2	22	161	3	0	By MS/MS	By matching	By matching	By MS/MS	By MS/MS	By MS/MS	6.1	2.8	3.9	45.3
gi|115311607|sp|P13995.2|MTDC_HUMAN	gi|115311607|sp|P13995.2|MTDC_HUMAN	2	2	2	>gi|115311607|sp|P13995.2|MTDC_HUMAN RecName: Full=Bifunctional methylenetetrahydrofolate dehydrogenase/cyclohydrolase, mitochondrial; Includes: RecName: Full=NAD-dependent methylenetetrahydrofolate dehydrogenase; Includes: RecName: Full=Methenyltetrahydro	1	2	2	2	1	1	1	1	2	1	1	1	1	1	2	1	1	1	1	1	2	1	6.6	6.6	6.6	37.895	350	350	2.22	3	3	1	2	0	By matching	By matching	By matching	By MS/MS	By MS/MS	By matching	3.1	3.1	3.1	3.1
gi|115311617|sp|Q9UHG3.3|PCYOX_HUMAN	gi|115311617|sp|Q9UHG3.3|PCYOX_HUMAN	1	1	1	>gi|115311617|sp|Q9UHG3.3|PCYOX_HUMAN RecName: Full=Prenylcysteine oxidase 1; AltName: Full=Prenylcysteine lyase; Flags: Precursor	1	1	1	1	0	0	0	1	0	0	0	0	0	1	0	0	0	0	0	1	0	0	2.2	2.2	2.2	56.639	505	505	2		1			1	By matching	By matching	By matching	By MS/MS	By matching	By matching	0	0	0	2.2
gi|115311701|sp|Q9UK59.2|DBR1_HUMAN	gi|115311701|sp|Q9UK59.2|DBR1_HUMAN	1	1	1	>gi|115311701|sp|Q9UK59.2|DBR1_HUMAN RecName: Full=Lariat debranching enzyme	1	1	1	1	0	0	0	1	1	1	0	0	0	1	1	1	0	0	0	1	1	1	3.7	3.7	3.7	61.554	544	544	2		3			0	By matching	By matching	By matching	By MS/MS	By MS/MS	By MS/MS	0	0	0	3.7
gi|115442|sp|P05109.1|S10A8_HUMAN	gi|115442|sp|P05109.1|S10A8_HUMAN	2	2	2	>gi|115442|sp|P05109.1|S10A8_HUMAN RecName: Full=Protein S100-A8; AltName: Full=Calgranulin-A; AltName: Full=Calprotectin L1L subunit; AltName: Full=Cystic fibrosis antigen; Short=CFAG; AltName: Full=Leukocyte L1 complex light chain; AltName: Full=Migratio	1	2	2	2	2	2	2	2	2	2	2	2	2	2	2	2	2	2	2	2	2	2	23.7	23.7	23.7	10.834	93	93	2.43	9	9	10	7	0	By MS/MS	By matching	By MS/MS	By MS/MS	By MS/MS	By MS/MS	23.7	23.7	23.7	23.7
gi|115444|sp|P06702.1|S10A9_HUMAN	gi|115444|sp|P06702.1|S10A9_HUMAN	3	3	3	>gi|115444|sp|P06702.1|S10A9_HUMAN RecName: Full=Protein S100-A9; AltName: Full=Calgranulin-B; AltName: Full=Calprotectin L1H subunit; AltName: Full=Leukocyte L1 complex heavy chain; AltName: Full=Migration inhibitory factor-related protein 14; Short=MRP-1	1	3	3	3	1	0	2	1	3	2	1	0	2	1	3	2	1	0	2	1	3	2	36	36	36	13.242	114	114	2.65	6	3	3	8	0	By MS/MS	By matching	By MS/MS	By MS/MS	By MS/MS	By MS/MS	11.4	0	24.6	13.2
gi|115456|sp|P00918.2|CAH2_HUMAN	gi|115456|sp|P00918.2|CAH2_HUMAN	5	5	5	>gi|115456|sp|P00918.2|CAH2_HUMAN RecName: Full=Carbonic anhydrase 2; AltName: Full=Carbonate dehydratase II; AltName: Full=Carbonic anhydrase C; Short=CAC; AltName: Full=Carbonic anhydrase II; Short=CA-II	1	5	5	5	1	1	0	5	5	5	1	1	0	5	5	5	1	1	0	5	5	5	24.2	24.2	24.2	29.246	260	260	1.04	22	1			0	By matching	By matching	By matching	By MS/MS	By MS/MS	By MS/MS	7.3	7.3	0	24.2
gi|115502350|sp|O95573.3|ACSL3_HUMAN	gi|115502350|sp|O95573.3|ACSL3_HUMAN	6	6	6	>gi|115502350|sp|O95573.3|ACSL3_HUMAN RecName: Full=Long-chain-fatty-acid--CoA ligase 3; AltName: Full=Long-chain acyl-CoA synthetase 3; Short=LACS 3	1	6	6	6	1	0	0	4	6	4	1	0	0	4	6	4	1	0	0	4	6	4	12.4	12.4	12.4	80.419	720	720	2.05	3	13	2	1	0	By matching	By matching	By matching	By MS/MS	By MS/MS	By MS/MS	2.2	0	0	9
gi|115502355|sp|O95671.3|ASML_HUMAN	gi|115502355|sp|O95671.3|ASML_HUMAN	2	2	2	>gi|115502355|sp|O95671.3|ASML_HUMAN RecName: Full=N-acetylserotonin O-methyltransferase-like protein; Short=ASMTL	1	2	2	2	0	0	0	1	2	2	0	0	0	1	2	2	0	0	0	1	2	2	3.9	3.9	3.9	68.856	621	621	2		5			0	By matching	By matching	By matching	By matching	By MS/MS	By MS/MS	0	0	0	1.9
gi|115502381|sp|P15924.3|DESP_HUMAN	gi|115502381|sp|P15924.3|DESP_HUMAN	75	75	75	>gi|115502381|sp|P15924.3|DESP_HUMAN RecName: Full=Desmoplakin; Short=DP; AltName: Full=250/210 kDa paraneoplastic pemphigus antigen	1	75	75	75	35	23	73	20	29	31	35	23	73	20	29	31	35	23	73	20	29	31	30.2	30.2	30.2	331.77	2871	2871	1.71	168	31	67	11	0	By MS/MS	By MS/MS	By MS/MS	By MS/MS	By MS/MS	By MS/MS	15.3	8.8	29.2	9.3
gi|115502407|sp|O75578.2|ITA10_HUMAN	gi|115502407|sp|O75578.2|ITA10_HUMAN	1	1	1	>gi|115502407|sp|O75578.2|ITA10_HUMAN RecName: Full=Integrin alpha-10; Flags: Precursor	1	1	1	1	0	0	0	1	0	0	0	0	0	1	0	0	0	0	0	1	0	0	1.3	1.3	1.3	127.6	1167	1167	2		1			1	By matching	By matching	By matching	By MS/MS	By matching	By matching	0	0	0	1.3
gi|115502437|sp|Q8TCS8.2|PNPT1_HUMAN	gi|115502437|sp|Q8TCS8.2|PNPT1_HUMAN	3	3	3	>gi|115502437|sp|Q8TCS8.2|PNPT1_HUMAN RecName: Full=Polyribonucleotide nucleotidyltransferase 1, mitochondrial; AltName: Full=3-5 RNA exonuclease OLD35; AltName: Full=PNPase old-35; AltName: Full=Polynucleotide phosphorylase 1; Short=PNPase 1; AltName: F	1	3	3	3	1	0	0	3	3	3	1	0	0	3	3	3	1	0	0	3	3	3	5.9	5.9	5.9	85.95	783	783	1.9	1	9			0	By matching	By matching	By matching	By MS/MS	By MS/MS	By MS/MS	2.2	0	0	5.9
gi|115502457|sp|P09132.3|SRP19_HUMAN	gi|115502457|sp|P09132.3|SRP19_HUMAN	1	1	1	>gi|115502457|sp|P09132.3|SRP19_HUMAN RecName: Full=Signal recognition particle 19 kDa protein; Short=SRP19	1	1	1	1	0	1	0	1	1	1	0	1	0	1	1	1	0	1	0	1	1	1	8.3	8.3	8.3	16.156	144	144	1	4				0	By matching	By matching	By matching	By MS/MS	By MS/MS	By MS/MS	0	8.3	0	8.3
gi|115502460|sp|P49588.2|SYAC_HUMAN	gi|115502460|sp|P49588.2|SYAC_HUMAN	28	28	28	>gi|115502460|sp|P49588.2|SYAC_HUMAN RecName: Full=Alanine--tRNA ligase, cytoplasmic; AltName: Full=Alanyl-tRNA synthetase; Short=AlaRS; AltName: Full=Renal carcinoma antigen NY-REN-42	1	28	28	28	2	2	3	21	24	26	2	2	3	21	24	26	2	2	3	21	24	26	40.3	40.3	40.3	106.81	968	968	2.78	1	28	99	1	0	By MS/MS	By MS/MS	By matching	By MS/MS	By MS/MS	By MS/MS	2.5	2.6	4	29.2
gi|115502869|sp|Q5J8M3.2|EMC4_HUMAN	gi|115502869|sp|Q5J8M3.2|EMC4_HUMAN	1	1	1	>gi|115502869|sp|Q5J8M3.2|EMC4_HUMAN RecName: Full=ER membrane protein complex subunit 4; AltName: Full=Cell proliferation-inducing gene 17 protein; AltName: Full=Transmembrane protein 85	1	1	1	1	0	0	0	1	1	1	0	0	0	1	1	1	0	0	0	1	1	1	5.5	5.5	5.5	20.086	183	183	1	3				0	By matching	By matching	By matching	By MS/MS	By MS/MS	By MS/MS	0	0	0	5.5
gi|115574|sp|P07384.1|CAN1_HUMAN	gi|115574|sp|P07384.1|CAN1_HUMAN	3	3	3	>gi|115574|sp|P07384.1|CAN1_HUMAN RecName: Full=Calpain-1 catalytic subunit; AltName: Full=Calcium-activated neutral proteinase 1; Short=CANP 1; AltName: Full=Calpain mu-type; AltName: Full=Calpain-1 large subunit; AltName: Full=Cell proliferation-inducing	1	3	3	3	0	0	2	3	3	3	0	0	2	3	3	3	0	0	2	3	3	3	4.5	4.5	4.5	81.889	714	714	1.82	2	9			0	By matching	By matching	By matching	By MS/MS	By MS/MS	By MS/MS	0	0	2.8	4.5
gi|115702|sp|P04040.3|CATA_HUMAN	gi|115702|sp|P04040.3|CATA_HUMAN	7	7	7	>gi|115702|sp|P04040.3|CATA_HUMAN RecName: Full=Catalase	1	7	7	7	6	5	5	6	7	5	6	5	5	6	7	5	6	5	5	6	7	5	17.3	17.3	17.3	59.755	527	527	1.98	6	33	5		0	By MS/MS	By MS/MS	By MS/MS	By MS/MS	By MS/MS	By MS/MS	17.1	14.8	15	17.1
gi|115717|sp|P07339.1|CATD_HUMAN	gi|115717|sp|P07339.1|CATD_HUMAN	5	5	5	>gi|115717|sp|P07339.1|CATD_HUMAN RecName: Full=Cathepsin D; Contains: RecName: Full=Cathepsin D light chain; Contains: RecName: Full=Cathepsin D heavy chain; Flags: Precursor	1	5	5	5	1	0	0	4	5	3	1	0	0	4	5	3	1	0	0	4	5	3	18.7	18.7	18.7	44.552	412	412	1.64	11			3	0	By matching	By matching	By matching	By MS/MS	By MS/MS	By MS/MS	2.7	0	0	14.3
gi|116051|sp|P24941.2|CDK2_HUMAN;gi|231726|sp|Q00526.1|CDK3_HUMAN	gi|116051|sp|P24941.2|CDK2_HUMAN	4;1	4;1	4;1	>gi|116051|sp|P24941.2|CDK2_HUMAN RecName: Full=Cyclin-dependent kinase 2; AltName: Full=Cell division protein kinase 2; AltName: Full=p33 protein kinase	2	4	4	4	0	0	1	4	3	4	0	0	1	4	3	4	0	0	1	4	3	4	17.8	17.8	17.8	33.929	298	298;305	1	12				0	By matching	By matching	By matching	By MS/MS	By MS/MS	By MS/MS	0	0	4.7	17.8
gi|116117|sp|P00450.1|CERU_HUMAN	gi|116117|sp|P00450.1|CERU_HUMAN	13	9	9	>gi|116117|sp|P00450.1|CERU_HUMAN RecName: Full=Ceruloplasmin; AltName: Full=Ferroxidase; Flags: Precursor	1	13	9	9	1	2	10	4	7	6	0	0	9	1	3	2	0	0	9	1	3	2	16.3	12.3	12.3	122.2	1065	1065	1.61	11	3	4		0	By matching	By matching	By MS/MS	By MS/MS	By matching	By MS/MS	0.9	1.9	13.2	5.8
gi|116241237|sp|P53396.3|ACLY_HUMAN	gi|116241237|sp|P53396.3|ACLY_HUMAN	45	45	45	>gi|116241237|sp|P53396.3|ACLY_HUMAN RecName: Full=ATP-citrate synthase; AltName: Full=ATP-citrate (pro-S-)-lyase; Short=ACL; AltName: Full=Citrate cleavage enzyme	1	45	45	45	4	10	8	43	40	41	4	10	8	43	40	41	4	10	8	43	40	41	50.3	50.3	50.3	120.84	1101	1101	2.92	1	18	201	2	0	By MS/MS	By MS/MS	By MS/MS	By MS/MS	By MS/MS	By MS/MS	4.8	11.5	9	47.5
gi|116241255|sp|P36404.4|ARL2_HUMAN	gi|116241255|sp|P36404.4|ARL2_HUMAN	3	3	3	>gi|116241255|sp|P36404.4|ARL2_HUMAN RecName: Full=ADP-ribosylation factor-like protein 2	1	3	3	3	0	0	0	3	2	2	0	0	0	3	2	2	0	0	0	3	2	2	23.9	23.9	23.9	20.878	184	184	1	7				0	By matching	By matching	By matching	By MS/MS	By MS/MS	By MS/MS	0	0	0	23.9
gi|116241260|sp|P13637.3|AT1A3_HUMAN;gi|1703467|sp|P50993.1|AT1A2_HUMAN;gi|23830899|sp|Q13733.3|AT1A4_HUMAN;gi|148877240|sp|P20648.5|ATP4A_HUMAN;gi|212287925|sp|P54707.3|AT12A_HUMAN	gi|116241260|sp|P13637.3|AT1A3_HUMAN;gi|1703467|sp|P50993.1|AT1A2_HUMAN;gi|23830899|sp|Q13733.3|AT1A4_HUMAN	16;11;8;3;3	1;0;0;0;0	1;0;0;0;0	>gi|116241260|sp|P13637.3|AT1A3_HUMAN RecName: Full=Sodium/potassium-transporting ATPase subunit alpha-3; Short=Na(+)/K(+) ATPase alpha-3 subunit; AltName: Full=Na(+)/K(+) ATPase alpha(III) subunit; AltName: Full=Sodium pump subunit alpha-3;>gi|1703467|sp|	5	16	1	1	5	2	3	14	15	14	0	0	0	1	1	1	0	0	0	1	1	1	18.7	1.3	1.3	111.75	1013	1013;1020;1029;1035;1039	2.33		2	1		1	By matching	By matching	By matching	By matching	By matching	By MS/MS	7.3	2.7	4.3	17.3
gi|116241267|sp|Q9Y6D6.2|BIG1_HUMAN	gi|116241267|sp|Q9Y6D6.2|BIG1_HUMAN	3	3	2	>gi|116241267|sp|Q9Y6D6.2|BIG1_HUMAN RecName: Full=Brefeldin A-inhibited guanine nucleotide-exchange protein 1; Short=Brefeldin A-inhibited GEP 1; AltName: Full=ADP-ribosylation factor guanine nucleotide-exchange factor 1; AltName: Full=p200 ARF guanine nu	1	3	3	2	0	0	0	3	2	3	0	0	0	3	2	3	0	0	0	2	1	2	2.7	2.7	2.1	208.76	1849	1849	3			9		0	By matching	By matching	By matching	By MS/MS	By MS/MS	By MS/MS	0	0	0	2.7
gi|116241275|sp|Q01668.2|CAC1D_HUMAN	gi|116241275|sp|Q01668.2|CAC1D_HUMAN	1	1	1	>gi|116241275|sp|Q01668.2|CAC1D_HUMAN RecName: Full=Voltage-dependent L-type calcium channel subunit alpha-1D; AltName: Full=Calcium channel, L type, alpha-1 polypeptide, isoform 2; AltName: Full=Voltage-gated calcium channel subunit alpha Cav1.3	1	1	1	1	1	1	1	1	1	1	1	1	1	1	1	1	1	1	1	1	1	1	0.6	0.6	0.6	245.14	2161	2161	3.2	4			11	0.0076675	By matching	By MS/MS	By matching	By MS/MS	By MS/MS	By matching	0.6	0.6	0.6	0.6
gi|116241277|sp|P19022.4|CADH2_HUMAN	gi|116241277|sp|P19022.4|CADH2_HUMAN	3	3	3	>gi|116241277|sp|P19022.4|CADH2_HUMAN RecName: Full=Cadherin-2; AltName: Full=CDw325; AltName: Full=Neural cadherin; Short=N-cadherin; AltName: CD_antigen=CD325; Flags: Precursor	1	3	3	3	0	0	0	3	3	3	0	0	0	3	3	3	0	0	0	3	3	3	6.6	6.6	6.6	99.808	906	906	3			9		0	By matching	By matching	By matching	By MS/MS	By MS/MS	By MS/MS	0	0	0	6.6
gi|116241283|sp|Q92793.3|CBP_HUMAN	gi|116241283|sp|Q92793.3|CBP_HUMAN	2	2	2	>gi|116241283|sp|Q92793.3|CBP_HUMAN RecName: Full=CREB-binding protein	1	2	2	2	0	0	0	2	2	2	0	0	0	2	2	2	0	0	0	2	2	2	1.5	1.5	1.5	265.35	2442	2442	3			6		0	By matching	By matching	By matching	By MS/MS	By matching	By MS/MS	0	0	0	1.5
gi|116241284|sp|Q13185.4|CBX3_HUMAN;gi|48428808|sp|P83916.1|CBX1_HUMAN	gi|116241284|sp|Q13185.4|CBX3_HUMAN	3;1	3;1	3;1	>gi|116241284|sp|Q13185.4|CBX3_HUMAN RecName: Full=Chromobox protein homolog 3; AltName: Full=HECH; AltName: Full=Heterochromatin protein 1 homolog gamma; Short=HP1 gamma; AltName: Full=Modifier 2 protein	2	3	3	3	0	0	0	3	3	2	0	0	0	3	3	2	0	0	0	3	3	2	16.4	16.4	16.4	20.811	183	183;185	1.08	11	1			0	By matching	By matching	By matching	By MS/MS	By MS/MS	By MS/MS	0	0	0	16.4
gi|116241306|sp|Q15003.3|CND2_HUMAN	gi|116241306|sp|Q15003.3|CND2_HUMAN	7	7	7	>gi|116241306|sp|Q15003.3|CND2_HUMAN RecName: Full=Condensin complex subunit 2; AltName: Full=Barren homolog protein 1; AltName: Full=Chromosome-associated protein H; Short=hCAP-H; AltName: Full=Non-SMC condensin I complex subunit H; AltName: Full=XCAP-H h	1	7	7	7	0	1	0	5	6	7	0	1	0	5	6	7	0	1	0	5	6	7	14.4	14.4	14.4	82.562	741	741	2.44		15	9	1	0	By matching	By matching	By matching	By MS/MS	By MS/MS	By MS/MS	0	1.3	0	9
gi|116241311|sp|P53618.3|COPB_HUMAN	gi|116241311|sp|P53618.3|COPB_HUMAN	18	18	18	>gi|116241311|sp|P53618.3|COPB_HUMAN RecName: Full=Coatomer subunit beta; AltName: Full=Beta-coat protein; Short=Beta-COP	1	18	18	18	0	0	3	14	15	18	0	0	3	14	15	18	0	0	3	14	15	18	29.1	29.1	29.1	107.14	953	953	2.74	4	10	55		0	By matching	By matching	By matching	By MS/MS	By MS/MS	By MS/MS	0	0	5.1	22
gi|116241325|sp|Q96C86.2|DCPS_HUMAN	gi|116241325|sp|Q96C86.2|DCPS_HUMAN	5	5	5	>gi|116241325|sp|Q96C86.2|DCPS_HUMAN RecName: Full=m7GpppX diphosphatase; AltName: Full=DCS-1; AltName: Full=Decapping scavenger enzyme; AltName: Full=Hint-related 7meGMP-directed hydrolase; AltName: Full=Histidine triad nucleotide-binding protein 5; AltNa	1	5	5	5	0	0	0	3	4	4	0	0	0	3	4	4	0	0	0	3	4	4	19.9	19.9	19.9	38.608	337	337	2		13			0	By matching	By matching	By matching	By MS/MS	By MS/MS	By MS/MS	0	0	0	12.5
gi|116241326|sp|Q7L014.2|DDX46_HUMAN	gi|116241326|sp|Q7L014.2|DDX46_HUMAN	2	2	2	>gi|116241326|sp|Q7L014.2|DDX46_HUMAN RecName: Full=Probable ATP-dependent RNA helicase DDX46; AltName: Full=DEAD box protein 46; AltName: Full=PRP5 homolog	1	2	2	2	0	0	0	1	2	1	0	0	0	1	2	1	0	0	0	1	2	1	2.9	2.9	2.9	117.36	1031	1031	3			4		0	By matching	By matching	By matching	By MS/MS	By MS/MS	By matching	0	0	0	1.3
gi|116241327|sp|P26196.2|DDX6_HUMAN	gi|116241327|sp|P26196.2|DDX6_HUMAN	8	8	8	>gi|116241327|sp|P26196.2|DDX6_HUMAN RecName: Full=Probable ATP-dependent RNA helicase DDX6; AltName: Full=ATP-dependent RNA helicase p54; AltName: Full=DEAD box protein 6; AltName: Full=Oncogene RCK	1	8	8	8	2	1	2	6	7	8	2	1	2	6	7	8	2	1	2	6	7	8	26.9	26.9	26.9	54.416	483	483	3	1	19	7	21	0	By MS/MS	By MS/MS	By matching	By MS/MS	By MS/MS	By MS/MS	7.5	5	7.2	19.3
gi|116241330|sp|Q08211.4|DHX9_HUMAN	gi|116241330|sp|Q08211.4|DHX9_HUMAN	23	23	23	>gi|116241330|sp|Q08211.4|DHX9_HUMAN RecName: Full=ATP-dependent RNA helicase A; Short=RHA; AltName: Full=DEAH box protein 9; AltName: Full=Leukophysin; Short=LKP; AltName: Full=Nuclear DNA helicase II; Short=NDH II	1	23	23	23	4	7	2	20	20	21	4	7	2	20	20	21	4	7	2	20	20	21	22.4	22.4	22.4	140.96	1270	1270	2.94	2	3	77	2	0	By matching	By MS/MS	By matching	By MS/MS	By MS/MS	By MS/MS	3.3	6.4	1.7	20
gi|116241339|sp|Q07864.5|DPOE1_HUMAN	gi|116241339|sp|Q07864.5|DPOE1_HUMAN	3	3	3	>gi|116241339|sp|Q07864.5|DPOE1_HUMAN RecName: Full=DNA polymerase epsilon catalytic subunit A; AltName: Full=DNA polymerase II subunit A	1	3	3	3	0	0	0	2	1	2	0	0	0	2	1	2	0	0	0	2	1	2	1.7	1.7	1.7	261.51	2286	2286	3			5		0	By matching	By matching	By matching	By MS/MS	By MS/MS	By MS/MS	0	0	0	1
gi|116241342|sp|Q14574.3|DSC3_HUMAN	gi|116241342|sp|Q14574.3|DSC3_HUMAN	3	3	3	>gi|116241342|sp|Q14574.3|DSC3_HUMAN RecName: Full=Desmocollin-3; AltName: Full=Cadherin family member 3; AltName: Full=Desmocollin-4; AltName: Full=HT-CP; Flags: Precursor	1	3	3	3	1	0	3	0	0	0	1	0	3	0	0	0	1	0	3	0	0	0	4.4	4.4	4.4	99.968	896	896	1	4				0	By matching	By matching	By MS/MS	By matching	By matching	By matching	1	0	4.4	0
gi|116241345|sp|P55084.3|ECHB_HUMAN	gi|116241345|sp|P55084.3|ECHB_HUMAN	7	7	7	>gi|116241345|sp|P55084.3|ECHB_HUMAN RecName: Full=Trifunctional enzyme subunit beta, mitochondrial; AltName: Full=TP-beta; Includes: RecName: Full=3-ketoacyl-CoA thiolase; AltName: Full=Acetyl-CoA acyltransferase; AltName: Full=Beta-ketothiolase; Flags: P	1	7	7	7	2	3	2	7	6	6	2	3	2	7	6	6	2	3	2	7	6	6	16	16	16	51.294	474	474	3.68		3	4	24	0	By matching	By matching	By matching	By MS/MS	By MS/MS	By MS/MS	3.8	5.7	3.8	16
gi|116241346|sp|Q96RP9.2|EFGM_HUMAN	gi|116241346|sp|Q96RP9.2|EFGM_HUMAN	6	6	6	>gi|116241346|sp|Q96RP9.2|EFGM_HUMAN RecName: Full=Elongation factor G, mitochondrial; Short=EF-Gmt; AltName: Full=Elongation factor G 1, mitochondrial; Short=mEF-G 1; AltName: Full=Elongation factor G1; Short=hEFG1; Flags: Precursor	1	6	6	6	0	0	0	5	5	5	0	0	0	5	5	5	0	0	0	5	5	5	11.9	11.9	11.9	83.471	751	751	2		18			0	By matching	By matching	By matching	By MS/MS	By MS/MS	By MS/MS	0	0	0	10.3
gi|116241354|sp|P30042.3|ES1_HUMAN	gi|116241354|sp|P30042.3|ES1_HUMAN	1	1	1	>gi|116241354|sp|P30042.3|ES1_HUMAN RecName: Full=ES1 protein homolog, mitochondrial; AltName: Full=Protein GT335; AltName: Full=Protein KNP-I; Flags: Precursor	1	1	1	1	0	0	0	1	1	1	0	0	0	1	1	1	0	0	0	1	1	1	9.3	9.3	9.3	28.17	268	268	4				3	0	By matching	By matching	By matching	By MS/MS	By MS/MS	By MS/MS	0	0	0	9.3
gi|116241365|sp|P21333.4|FLNA_HUMAN	gi|116241365|sp|P21333.4|FLNA_HUMAN	88	88	83	>gi|116241365|sp|P21333.4|FLNA_HUMAN RecName: Full=Filamin-A; Short=FLN-A; AltName: Full=Actin-binding protein 280; Short=ABP-280; AltName: Full=Alpha-filamin; AltName: Full=Endothelial actin-binding protein; AltName: Full=Filamin-1; AltName: Full=Non-musc	1	88	88	83	5	9	8	82	84	87	5	9	8	82	84	87	4	9	8	77	79	82	50.4	50.4	48.2	280.74	2647	2647	2.84	15	47	349	10	0	By MS/MS	By matching	By MS/MS	By MS/MS	By MS/MS	By MS/MS	2.6	5.4	4.8	45.8
gi|116241370|sp|Q96AE4.3|FUBP1_HUMAN	gi|116241370|sp|Q96AE4.3|FUBP1_HUMAN	9	9	9	>gi|116241370|sp|Q96AE4.3|FUBP1_HUMAN RecName: Full=Far upstream element-binding protein 1; Short=FBP; Short=FUSE-binding protein 1; AltName: Full=DNA helicase V; Short=hDH V	1	9	9	9	0	0	1	8	8	9	0	0	1	8	8	9	0	0	1	8	8	9	23	23	23	67.56	644	644	2.09	1	29	4		0	By matching	By matching	By matching	By MS/MS	By MS/MS	By MS/MS	0	0	2	19.3
gi|116242482|sp|Q9UN86.2|G3BP2_HUMAN	gi|116242482|sp|Q9UN86.2|G3BP2_HUMAN	4	3	3	>gi|116242482|sp|Q9UN86.2|G3BP2_HUMAN RecName: Full=Ras GTPase-activating protein-binding protein 2; Short=G3BP-2; AltName: Full=GAP SH3 domain-binding protein 2	1	4	3	3	1	0	0	3	4	4	1	0	0	2	3	3	1	0	0	2	3	3	12	9.5	9.5	54.12	482	482	2.27		12	2	1	0	By matching	By matching	By matching	By MS/MS	By MS/MS	By MS/MS	2.7	0	0	8.7
gi|116242483|sp|P11413.4|G6PD_HUMAN	gi|116242483|sp|P11413.4|G6PD_HUMAN	5	5	5	>gi|116242483|sp|P11413.4|G6PD_HUMAN RecName: Full=Glucose-6-phosphate 1-dehydrogenase; Short=G6PD	1	5	5	5	1	1	1	5	4	4	1	1	1	5	4	4	1	1	1	5	4	4	11.8	11.8	11.8	59.256	515	515	2.38	1	18		5	0	By matching	By matching	By MS/MS	By MS/MS	By MS/MS	By MS/MS	3.1	3.1	3.1	11.8
gi|116242490|sp|Q13724.5|MOGS_HUMAN	gi|116242490|sp|Q13724.5|MOGS_HUMAN	2	2	2	>gi|116242490|sp|Q13724.5|MOGS_HUMAN RecName: Full=Mannosyl-oligosaccharide glucosidase; AltName: Full=Processing A-glucosidase I	1	2	2	2	0	0	0	1	2	1	0	0	0	1	2	1	0	0	0	1	2	1	4.5	4.5	4.5	91.916	837	837	2		4			0	By matching	By matching	By matching	By MS/MS	By MS/MS	By MS/MS	0	0	0	1.4
gi|116242491|sp|P35573.3|GDE_HUMAN	gi|116242491|sp|P35573.3|GDE_HUMAN	11	11	11	>gi|116242491|sp|P35573.3|GDE_HUMAN RecName: Full=Glycogen debranching enzyme; AltName: Full=Glycogen debrancher; Includes: RecName: Full=4-alpha-glucanotransferase; AltName: Full=Oligo-1,4-1,4-glucantransferase; Includes: RecName: Full=Amylo-alpha-1,6-glu	1	11	11	11	0	0	0	10	10	9	0	0	0	10	10	9	0	0	0	10	10	9	9.3	9.3	9.3	174.76	1532	1532	3.03			29	1	0	By matching	By matching	By matching	By MS/MS	By MS/MS	By MS/MS	0	0	0	8.3
gi|116242499|sp|P14314.2|GLU2B_HUMAN	gi|116242499|sp|P14314.2|GLU2B_HUMAN	5	5	5	>gi|116242499|sp|P14314.2|GLU2B_HUMAN RecName: Full=Glucosidase 2 subunit beta; AltName: Full=80K-H protein; AltName: Full=Glucosidase II subunit beta; AltName: Full=Protein kinase C substrate 60.1 kDa protein heavy chain; Short=PKCSH; Flags: Precursor	1	5	5	5	0	1	2	5	5	4	0	1	2	5	5	4	0	1	2	5	5	4	8.7	8.7	8.7	59.425	528	528	1.96	3	22	2		0	By matching	By matching	By matching	By MS/MS	By MS/MS	By MS/MS	0	2.1	4.9	8.7
gi|116242516|sp|P19367.3|HXK1_HUMAN;gi|311033440|sp|Q2TB90.3|HKDC1_HUMAN;gi|206729871|sp|P52790.2|HXK3_HUMAN	gi|116242516|sp|P19367.3|HXK1_HUMAN	22;2;1	22;2;1	19;2;0	>gi|116242516|sp|P19367.3|HXK1_HUMAN RecName: Full=Hexokinase-1; AltName: Full=Brain form hexokinase; AltName: Full=Hexokinase type I; Short=HK I	3	22	22	19	0	0	0	18	22	21	0	0	0	18	22	21	0	0	0	15	19	18	26.9	26.9	23.6	102.48	917	917;917;923	2.78	1	16	65		0	By matching	By matching	By matching	By MS/MS	By MS/MS	By MS/MS	0	0	0	25.5
gi|116242592|sp|Q9H2U2.2|IPYR2_HUMAN	gi|116242592|sp|Q9H2U2.2|IPYR2_HUMAN	2	2	2	>gi|116242592|sp|Q9H2U2.2|IPYR2_HUMAN RecName: Full=Inorganic pyrophosphatase 2, mitochondrial; AltName: Full=Pyrophosphatase SID6-306; AltName: Full=Pyrophosphate phospho-hydrolase 2; Short=PPase 2; Flags: Precursor	1	2	2	2	0	0	0	2	2	2	0	0	0	2	2	2	0	0	0	2	2	2	7.5	7.5	7.5	37.92	334	334	1	6				0	By matching	By matching	By matching	By MS/MS	By MS/MS	By MS/MS	0	0	0	7.5
gi|116242604|sp|P52732.2|KIF11_HUMAN	gi|116242604|sp|P52732.2|KIF11_HUMAN	32	32	32	>gi|116242604|sp|P52732.2|KIF11_HUMAN RecName: Full=Kinesin-like protein KIF11; AltName: Full=Kinesin-like protein 1; AltName: Full=Kinesin-like spindle protein HKSP; AltName: Full=Kinesin-related motor protein Eg5; AltName: Full=Thyroid receptor-interacti	1	32	32	32	2	1	2	29	30	30	2	1	2	29	30	30	2	1	2	29	30	30	40.2	40.2	40.2	119.16	1056	1056	2.99		3	117	2	0	By matching	By MS/MS	By matching	By MS/MS	By MS/MS	By MS/MS	2.1	0.9	2.1	35.2
gi|116242605|sp|O60333.5|KIF1B_HUMAN	gi|116242605|sp|O60333.5|KIF1B_HUMAN	2	1	1	>gi|116242605|sp|O60333.5|KIF1B_HUMAN RecName: Full=Kinesin-like protein KIF1B; Short=Klp	1	2	1	1	0	0	1	1	2	2	0	0	1	1	1	1	0	0	1	1	1	1	1.3	0.7	0.7	204.47	1816	1816	3			5		1	By matching	By matching	By matching	By matching	By MS/MS	By MS/MS	0	0	0.7	0.7
gi|116242607|sp|Q9NSK0.3|KLC4_HUMAN	gi|116242607|sp|Q9NSK0.3|KLC4_HUMAN	4	4	4	>gi|116242607|sp|Q9NSK0.3|KLC4_HUMAN RecName: Full=Kinesin light chain 4; Short=KLC 4; AltName: Full=Kinesin-like protein 8	1	4	4	4	0	0	0	4	4	4	0	0	0	4	4	4	0	0	0	4	4	4	10.5	10.5	10.5	68.639	619	619	2.14		12	2		0	By matching	By matching	By matching	By MS/MS	By MS/MS	By MS/MS	0	0	0	10.5
gi|116242675|sp|Q8TD19.2|NEK9_HUMAN	gi|116242675|sp|Q8TD19.2|NEK9_HUMAN	21	21	21	>gi|116242675|sp|Q8TD19.2|NEK9_HUMAN RecName: Full=Serine/threonine-protein kinase Nek9; AltName: Full=Nercc1 kinase; AltName: Full=Never in mitosis A-related kinase 9; Short=NimA-related protein kinase 9; AltName: Full=NimA-related kinase 8; Short=Nek8	1	21	21	21	0	0	0	20	20	19	0	0	0	20	20	19	0	0	0	20	20	19	33.5	33.5	33.5	107.17	979	979	2.97	1	2	68	2	0	By matching	By matching	By matching	By MS/MS	By MS/MS	By MS/MS	0	0	0	29.9
gi|116242678|sp|Q00653.4|NFKB2_HUMAN	gi|116242678|sp|Q00653.4|NFKB2_HUMAN	5	5	5	>gi|116242678|sp|Q00653.4|NFKB2_HUMAN RecName: Full=Nuclear factor NF-kappa-B p100 subunit; AltName: Full=DNA-binding factor KBF2; AltName: Full=H2TF1; AltName: Full=Lymphocyte translocation chromosome 10 protein; AltName: Full=Nuclear factor of kappa ligh	1	5	5	5	0	0	1	3	5	4	0	0	1	3	5	4	0	0	1	3	5	4	8.1	8.1	8.1	96.748	900	900	2.93		1	13		0	By matching	By matching	By matching	By MS/MS	By MS/MS	By MS/MS	0	0	1.2	4.1
gi|116242683|sp|Q8TB37.3|NUBPL_HUMAN	gi|116242683|sp|Q8TB37.3|NUBPL_HUMAN	1	1	1	>gi|116242683|sp|Q8TB37.3|NUBPL_HUMAN RecName: Full=Iron-sulfur protein NUBPL; AltName: Full=IND1 homolog; AltName: Full=Nucleotide-binding protein-like; AltName: Full=huInd1; Flags: Precursor	1	1	1	1	0	0	0	1	1	1	0	0	0	1	1	1	0	0	0	1	1	1	6.3	6.3	6.3	34.082	319	319	1	3				0	By matching	By matching	By matching	By matching	By MS/MS	By matching	0	0	0	6.3
gi|116242684|sp|Q8N1F7.2|NUP93_HUMAN	gi|116242684|sp|Q8N1F7.2|NUP93_HUMAN	1	1	1	>gi|116242684|sp|Q8N1F7.2|NUP93_HUMAN RecName: Full=Nuclear pore complex protein Nup93; AltName: Full=93 kDa nucleoporin; AltName: Full=Nucleoporin Nup93	1	1	1	1	0	0	0	1	1	1	0	0	0	1	1	1	0	0	0	1	1	1	1.3	1.3	1.3	93.487	819	819	2.25		3	1		0	By matching	By matching	By matching	By MS/MS	By matching	By MS/MS	0	0	0	1.3
gi|116242694|sp|Q9Y3B8.3|ORN_HUMAN	gi|116242694|sp|Q9Y3B8.3|ORN_HUMAN	1	1	1	>gi|116242694|sp|Q9Y3B8.3|ORN_HUMAN RecName: Full=Oligoribonuclease, mitochondrial; AltName: Full=RNA exonuclease 2 homolog; AltName: Full=Small fragment nuclease; Flags: Precursor	1	1	1	1	0	0	0	1	1	1	0	0	0	1	1	1	0	0	0	1	1	1	7.6	7.6	7.6	26.832	237	237	4				3	0.0091197	By matching	By matching	By matching	By MS/MS	By matching	By matching	0	0	0	7.6
gi|116242695|sp|Q9HC10.3|OTOF_HUMAN	gi|116242695|sp|Q9HC10.3|OTOF_HUMAN	1	1	1	>gi|116242695|sp|Q9HC10.3|OTOF_HUMAN RecName: Full=Otoferlin; AltName: Full=Fer-1-like protein 2	1	1	1	1	0	0	0	0	1	0	0	0	0	0	1	0	0	0	0	0	1	0	0.9	0.9	0.9	226.75	1997	1997	2		1			1	By matching	By matching	By matching	By matching	By MS/MS	By matching	0	0	0	0
gi|116242701|sp|Q96RG2.3|PASK_HUMAN	gi|116242701|sp|Q96RG2.3|PASK_HUMAN	6	6	6	>gi|116242701|sp|Q96RG2.3|PASK_HUMAN RecName: Full=PAS domain-containing serine/threonine-protein kinase; Short=PAS-kinase; Short=PASKIN; Short=hPASK	1	6	6	6	0	0	0	5	4	6	0	0	0	5	4	6	0	0	0	5	4	6	7.7	7.7	7.7	142.93	1323	1323	3			15		0	By matching	By matching	By matching	By MS/MS	By MS/MS	By MS/MS	0	0	0	5.7
gi|116242714|sp|Q13492.2|PICAL_HUMAN;gi|27805394|sp|O60641.2|AP180_HUMAN	gi|116242714|sp|Q13492.2|PICAL_HUMAN	3;1	3;1	3;1	>gi|116242714|sp|Q13492.2|PICAL_HUMAN RecName: Full=Phosphatidylinositol-binding clathrin assembly protein; AltName: Full=Clathrin assembly lymphoid myeloid leukemia protein	2	3	3	3	0	0	1	3	3	2	0	0	1	3	3	2	0	0	1	3	3	2	6.3	6.3	6.3	70.754	652	652;907	2	1	8	1		0	By matching	By matching	By matching	By MS/MS	By MS/MS	By MS/MS	0	0	2	6.3
gi|116242733|sp|P28070.4|PSB4_HUMAN	gi|116242733|sp|P28070.4|PSB4_HUMAN	3	3	3	>gi|116242733|sp|P28070.4|PSB4_HUMAN RecName: Full=Proteasome subunit beta type-4; AltName: Full=26 kDa prosomal protein; Short=HsBPROS26; Short=PROS-26; AltName: Full=Macropain beta chain; AltName: Full=Multicatalytic endopeptidase complex beta chain; Alt	1	3	3	3	0	0	0	3	3	2	0	0	0	3	3	2	0	0	0	3	3	2	21.6	21.6	21.6	29.204	264	264	4				10	0	By matching	By matching	By matching	By MS/MS	By MS/MS	By MS/MS	0	0	0	21.6
gi|116242736|sp|Q13308.2|PTK7_HUMAN	gi|116242736|sp|Q13308.2|PTK7_HUMAN	4	4	4	>gi|116242736|sp|Q13308.2|PTK7_HUMAN RecName: Full=Inactive tyrosine-protein kinase 7; AltName: Full=Colon carcinoma kinase 4; Short=CCK-4; AltName: Full=Protein-tyrosine kinase 7; AltName: Full=Pseudo tyrosine kinase receptor 7; AltName: Full=Tyrosine-pro	1	4	4	4	0	0	0	4	3	4	0	0	0	4	3	4	0	0	0	4	3	4	5.3	5.3	5.3	118.39	1070	1070	3			11		0	By matching	By matching	By matching	By MS/MS	By matching	By MS/MS	0	0	0	5.3
gi|116242743|sp|Q15276.2|RABE1_HUMAN	gi|116242743|sp|Q15276.2|RABE1_HUMAN	23	23	23	>gi|116242743|sp|Q15276.2|RABE1_HUMAN RecName: Full=Rab GTPase-binding effector protein 1; AltName: Full=Rabaptin-4; AltName: Full=Rabaptin-5; AltName: Full=Rabaptin-5alpha; AltName: Full=Renal carcinoma antigen NY-REN-17	1	23	23	23	1	1	2	22	21	22	1	1	2	22	21	22	1	1	2	22	21	22	30	30	30	99.289	862	862	2.92	2	5	75	2	0	By matching	By matching	By matching	By MS/MS	By MS/MS	By MS/MS	1.9	1.2	3	28.7
gi|116242767|sp|P19388.4|RPAB1_HUMAN	gi|116242767|sp|P19388.4|RPAB1_HUMAN	3	3	3	>gi|116242767|sp|P19388.4|RPAB1_HUMAN RecName: Full=DNA-directed RNA polymerases I, II, and III subunit RPABC1; Short=RNA polymerases I, II, and III subunit ABC1; AltName: Full=DNA-directed RNA polymerase II 23 kDa polypeptide; AltName: Full=DNA-directed R	1	3	3	3	0	0	0	3	3	3	0	0	0	3	3	3	0	0	0	3	3	3	19	19	19	24.551	210	210	4				9	0	By matching	By matching	By matching	By MS/MS	By MS/MS	By MS/MS	0	0	0	19
gi|116242771|sp|Q9NP92.2|RT30_HUMAN	gi|116242771|sp|Q9NP92.2|RT30_HUMAN	2	2	2	>gi|116242771|sp|Q9NP92.2|RT30_HUMAN RecName: Full=28S ribosomal protein S30, mitochondrial; Short=MRP-S30; Short=S30mt; AltName: Full=Programmed cell death protein 9	1	2	2	2	0	1	0	1	2	1	0	1	0	1	2	1	0	1	0	1	2	1	5.7	5.7	5.7	50.364	439	439	4				5	0	By matching	By matching	By matching	By MS/MS	By MS/MS	By matching	0	3	0	3
gi|116242782|sp|Q15424.4|SAFB1_HUMAN	gi|116242782|sp|Q15424.4|SAFB1_HUMAN	1	1	1	>gi|116242782|sp|Q15424.4|SAFB1_HUMAN RecName: Full=Scaffold attachment factor B1; Short=SAF-B; Short=SAF-B1; AltName: Full=HSP27 estrogen response element-TATA box-binding protein; Short=HSP27 ERE-TATA-binding protein	1	1	1	1	0	0	0	0	1	0	0	0	0	0	1	0	0	0	0	0	1	0	2.3	2.3	2.3	102.64	915	915	2		1			0.0076122	By matching	By matching	By matching	By matching	By MS/MS	By matching	0	0	0	0
gi|116242787|sp|Q15393.4|SF3B3_HUMAN	gi|116242787|sp|Q15393.4|SF3B3_HUMAN	20	20	20	>gi|116242787|sp|Q15393.4|SF3B3_HUMAN RecName: Full=Splicing factor 3B subunit 3; AltName: Full=Pre-mRNA-splicing factor SF3b 130 kDa subunit; Short=SF3b130; AltName: Full=STAF130; AltName: Full=Spliceosome-associated protein 130; Short=SAP 130	1	20	20	20	1	0	1	19	20	20	1	0	1	19	20	20	1	0	1	19	20	20	21.8	21.8	21.8	135.58	1217	1217	2.87		13	72	2	0	By matching	By matching	By matching	By MS/MS	By MS/MS	By MS/MS	1	0	1	20.9
gi|116242794|sp|P54920.3|SNAA_HUMAN	gi|116242794|sp|P54920.3|SNAA_HUMAN	2	2	2	>gi|116242794|sp|P54920.3|SNAA_HUMAN RecName: Full=Alpha-soluble NSF attachment protein; Short=SNAP-alpha; AltName: Full=N-ethylmaleimide-sensitive factor attachment protein alpha	1	2	2	2	0	0	1	2	2	2	0	0	1	2	2	2	0	0	1	2	2	2	6.8	6.8	6.8	33.232	295	295	1	7				0.0041911	By matching	By matching	By matching	By matching	By MS/MS	By MS/MS	0	0	3.4	6.8
gi|116242799|sp|Q01082.2|SPTB2_HUMAN	gi|116242799|sp|Q01082.2|SPTB2_HUMAN	20	20	19	>gi|116242799|sp|Q01082.2|SPTB2_HUMAN RecName: Full=Spectrin beta chain, non-erythrocytic 1; AltName: Full=Beta-II spectrin; AltName: Full=Fodrin beta chain; AltName: Full=Spectrin, non-erythroid beta chain 1	1	20	20	19	0	0	1	13	19	15	0	0	1	13	19	15	0	0	1	12	18	14	12.7	12.7	12.1	274.61	2364	2364	2.98		1	50		0	By matching	By matching	By matching	By MS/MS	By MS/MS	By MS/MS	0	0	0.6	8.8
gi|116242801|sp|P37108.2|SRP14_HUMAN	gi|116242801|sp|P37108.2|SRP14_HUMAN	1	1	1	>gi|116242801|sp|P37108.2|SRP14_HUMAN RecName: Full=Signal recognition particle 14 kDa protein; Short=SRP14; AltName: Full=18 kDa Alu RNA-binding protein	1	1	1	1	0	0	0	1	1	1	0	0	0	1	1	1	0	0	0	1	1	1	10.3	10.3	10.3	14.57	136	136	1	3				0	By matching	By matching	By matching	By MS/MS	By MS/MS	By MS/MS	0	0	0	10.3
gi|116242809|sp|Q8WXH0.3|SYNE2_HUMAN	gi|116242809|sp|Q8WXH0.3|SYNE2_HUMAN	3	3	3	>gi|116242809|sp|Q8WXH0.3|SYNE2_HUMAN RecName: Full=Nesprin-2; AltName: Full=Nuclear envelope spectrin repeat protein 2; AltName: Full=Nucleus and actin connecting element protein; Short=Protein NUANCE; AltName: Full=Synaptic nuclear envelope protein 2; Sh	1	3	3	3	0	1	0	1	2	3	0	1	0	1	2	3	0	1	0	1	2	3	0.4	0.4	0.4	796.43	6885	6885	2.38		5	3		0	By matching	By matching	By matching	By matching	By MS/MS	By MS/MS	0	0.1	0	0.1
gi|116242825|sp|Q14134.2|TRI29_HUMAN	gi|116242825|sp|Q14134.2|TRI29_HUMAN	4	4	4	>gi|116242825|sp|Q14134.2|TRI29_HUMAN RecName: Full=Tripartite motif-containing protein 29; AltName: Full=Ataxia telangiectasia group D-associated protein	1	4	4	4	1	0	4	0	0	0	1	0	4	0	0	0	1	0	4	0	0	0	9	9	9	65.834	588	588	1	6				0	By matching	By matching	By MS/MS	By matching	By matching	By matching	2.2	0	9	0
gi|116242839|sp|Q13107.3|UBP4_HUMAN	gi|116242839|sp|Q13107.3|UBP4_HUMAN	3	1	1	>gi|116242839|sp|Q13107.3|UBP4_HUMAN RecName: Full=Ubiquitin carboxyl-terminal hydrolase 4; AltName: Full=Deubiquitinating enzyme 4; AltName: Full=Ubiquitin thioesterase 4; AltName: Full=Ubiquitin-specific-processing protease 4; AltName: Full=Ubiquitous nu	1	3	1	1	0	0	0	2	3	3	0	0	0	1	1	1	0	0	0	1	1	1	3.7	1.3	1.3	108.56	963	963	3			3		0	By matching	By matching	By matching	By matching	By MS/MS	By MS/MS	0	0	0	2.8
gi|116242850|sp|Q5TAX3.3|TUT4_HUMAN	gi|116242850|sp|Q5TAX3.3|TUT4_HUMAN	3	3	3	>gi|116242850|sp|Q5TAX3.3|TUT4_HUMAN RecName: Full=Terminal uridylyltransferase 4; Short=TUTase 4; AltName: Full=Zinc finger CCHC domain-containing protein 11	1	3	3	3	0	0	0	3	2	3	0	0	0	3	2	3	0	0	0	3	2	3	2.7	2.7	2.7	185.16	1644	1644	3			8		0	By matching	By matching	By matching	By MS/MS	By matching	By MS/MS	0	0	0	2.7
gi|116247771|sp|Q8IX18.2|DHX40_HUMAN	gi|116247771|sp|Q8IX18.2|DHX40_HUMAN	1	1	1	>gi|116247771|sp|Q8IX18.2|DHX40_HUMAN RecName: Full=Probable ATP-dependent RNA helicase DHX40; AltName: Full=DEAH box protein 40; AltName: Full=Protein PAD	1	1	1	1	0	0	0	1	1	1	0	0	0	1	1	1	0	0	0	1	1	1	1.7	1.7	1.7	88.559	779	779	2.25		3	1		0.0076706	By matching	By matching	By matching	By MS/MS	By MS/MS	By matching	0	0	0	1.7
gi|52000961|sp|P63092.1|GNAS2_HUMAN;gi|116248089|sp|Q5JWF2.2|GNAS1_HUMAN;gi|121032|sp|P11488.5|GNAT1_HUMAN;gi|52000964|sp|P63096.2|GNAI1_HUMAN;gi|232151|sp|P19087.4|GNAT2_HUMAN;gi|232133|sp|P09471.4|GNAO_HUMAN;gi|193806162|sp|A8MTJ3.2|GNAT3_HUMAN;gi|585178|sp|P38405.1|GNAL_HUMAN	gi|52000961|sp|P63092.1|GNAS2_HUMAN;gi|116248089|sp|Q5JWF2.2|GNAS1_HUMAN;gi|121032|sp|P11488.5|GNAT1_HUMAN;gi|52000964|sp|P63096.2|GNAI1_HUMAN;gi|232151|sp|P19087.4|GNAT2_HUMAN;gi|232133|sp|P09471.4|GNAO_HUMAN;gi|193806162|sp|A8MTJ3.2|GNAT3_HUMAN;gi|585178|sp|P38405.1|GNAL_HUMAN	2;2;1;1;1;1;1;1	1;1;0;0;0;0;0;0	1;1;0;0;0;0;0;0	>gi|52000961|sp|P63092.1|GNAS2_HUMAN RecName: Full=Guanine nucleotide-binding protein G(s) subunit alpha isoforms short; AltName: Full=Adenylate cyclase-stimulating G alpha protein;>gi|116248089|sp|Q5JWF2.2|GNAS1_HUMAN RecName: Full=Guanine nucleotide-bind	8	2	1	1	0	0	0	1	2	2	0	0	0	1	1	1	0	0	0	1	1	1	6.9	4.1	4.1	45.664	394	394;1037;350;354;354;354;354;381	2		3			0.00043898	By matching	By matching	By matching	By MS/MS	By MS/MS	By MS/MS	0	0	0	4.1
gi|116248550|sp|Q53H12.2|AGK_HUMAN	gi|116248550|sp|Q53H12.2|AGK_HUMAN	1	1	1	>gi|116248550|sp|Q53H12.2|AGK_HUMAN RecName: Full=Acylglycerol kinase, mitochondrial; Short=hAGK; AltName: Full=Multiple substrate lipid kinase; Short=HsMuLK; Short=MuLK; Short=Multi-substrate lipid kinase; Flags: Precursor	1	1	1	1	0	0	0	1	1	1	0	0	0	1	1	1	0	0	0	1	1	1	5.9	5.9	5.9	47.137	422	422	3		2	1	2	0	By matching	By matching	By matching	By MS/MS	By MS/MS	By MS/MS	0	0	0	5.9
gi|116533|sp|P10909.1|CLUS_HUMAN	gi|116533|sp|P10909.1|CLUS_HUMAN	4	4	4	>gi|116533|sp|P10909.1|CLUS_HUMAN RecName: Full=Clusterin; AltName: Full=Aging-associated gene 4 protein; AltName: Full=Apolipoprotein J; Short=Apo-J; AltName: Full=Complement cytolysis inhibitor; Short=CLI; AltName: Full=Complement-associated protein SP-4	1	4	4	4	0	2	4	1	0	0	0	2	4	1	0	0	0	2	4	1	0	0	14.9	14.9	14.9	52.494	449	449	1	8				0	By matching	By MS/MS	By MS/MS	By matching	By matching	By matching	0	7.6	14.9	2.4
gi|1168283|sp|P45954.1|ACDSB_HUMAN	gi|1168283|sp|P45954.1|ACDSB_HUMAN	4	4	4	>gi|1168283|sp|P45954.1|ACDSB_HUMAN RecName: Full=Short/branched chain specific acyl-CoA dehydrogenase, mitochondrial; Short=SBCAD; AltName: Full=2-methyl branched chain acyl-CoA dehydrogenase; Short=2-MEBCAD; AltName: Full=2-methylbutyryl-coenzyme A dehyd	1	4	4	4	0	0	0	2	3	4	0	0	0	2	3	4	0	0	0	2	3	4	13.9	13.9	13.9	47.485	432	432	2		9			0	By matching	By matching	By matching	By MS/MS	By MS/MS	By MS/MS	0	0	0	6.5
gi|1168333|sp|P42025.1|ACTY_HUMAN	gi|1168333|sp|P42025.1|ACTY_HUMAN	3	1	1	>gi|1168333|sp|P42025.1|ACTY_HUMAN RecName: Full=Beta-centractin; AltName: Full=Actin-related protein 1B; Short=ARP1B	1	3	1	1	0	0	0	2	2	3	0	0	0	1	1	1	0	0	0	1	1	1	9.6	4	4	42.293	376	376	2.14		6	1		0	By matching	By matching	By matching	By MS/MS	By MS/MS	By MS/MS	0	0	0	6.9
gi|116848|sp|P23528.3|COF1_HUMAN	gi|116848|sp|P23528.3|COF1_HUMAN	8	8	6	>gi|116848|sp|P23528.3|COF1_HUMAN RecName: Full=Cofilin-1; AltName: Full=18 kDa phosphoprotein; Short=p18; AltName: Full=Cofilin, non-muscle isoform	1	8	8	6	1	1	3	8	6	6	1	1	3	8	6	6	1	1	2	6	5	5	61.4	61.4	42.8	18.502	166	166	1.48	37	12	6	1	0	By MS/MS	By matching	By MS/MS	By MS/MS	By MS/MS	By MS/MS	7.2	7.2	22.3	61.4
gi|1168867|sp|P11802.2|CDK4_HUMAN	gi|1168867|sp|P11802.2|CDK4_HUMAN	2	2	2	>gi|1168867|sp|P11802.2|CDK4_HUMAN RecName: Full=Cyclin-dependent kinase 4; AltName: Full=Cell division protein kinase 4; AltName: Full=PSK-J3	1	2	2	2	0	0	0	2	2	1	0	0	0	2	2	1	0	0	0	2	2	1	10.9	10.9	10.9	33.729	303	303	1	5				0	By matching	By matching	By matching	By MS/MS	By MS/MS	By MS/MS	0	0	0	10.9
gi|116907|sp|P21964.2|COMT_HUMAN	gi|116907|sp|P21964.2|COMT_HUMAN	2	2	2	>gi|116907|sp|P21964.2|COMT_HUMAN RecName: Full=Catechol O-methyltransferase	1	2	2	2	0	0	0	2	2	2	0	0	0	2	2	2	0	0	0	2	2	2	10.3	10.3	10.3	30.037	271	271	1	6				0	By matching	By matching	By matching	By MS/MS	By MS/MS	By matching	0	0	0	10.3
gi|1169094|sp|P46109.1|CRKL_HUMAN	gi|1169094|sp|P46109.1|CRKL_HUMAN	8	8	8	>gi|1169094|sp|P46109.1|CRKL_HUMAN RecName: Full=Crk-like protein	1	8	8	8	0	0	0	7	8	7	0	0	0	7	8	7	0	0	0	7	8	7	41.3	41.3	41.3	33.777	303	303	1.84	4	21			0	By matching	By matching	By matching	By MS/MS	By MS/MS	By MS/MS	0	0	0	36.3
gi|1169204|sp|P42126.1|ECI1_HUMAN	gi|1169204|sp|P42126.1|ECI1_HUMAN	4	4	4	>gi|1169204|sp|P42126.1|ECI1_HUMAN RecName: Full=Enoyl-CoA delta isomerase 1, mitochondrial; AltName: Full=3,2-trans-enoyl-CoA isomerase; AltName: Full=Delta(3),Delta(2)-enoyl-CoA isomerase; Short=D3,D2-enoyl-CoA isomerase; AltName: Full=Dodecenoyl-CoA iso	1	4	4	4	0	0	0	4	4	4	0	0	0	4	4	4	0	0	0	4	4	4	15.2	15.2	15.2	32.816	302	302	1.14	19	1	1		0	By matching	By matching	By matching	By MS/MS	By MS/MS	By MS/MS	0	0	0	15.2
gi|1169337|sp|P31040.2|SDHA_HUMAN	gi|1169337|sp|P31040.2|SDHA_HUMAN	9	9	9	>gi|1169337|sp|P31040.2|SDHA_HUMAN RecName: Full=Succinate dehydrogenase [ubiquinone] flavoprotein subunit, mitochondrial; AltName: Full=Flavoprotein subunit of complex II; Short=Fp; Flags: Precursor	1	9	9	9	2	0	0	7	7	9	2	0	0	7	7	9	2	0	0	7	7	9	21.4	21.4	21.4	72.691	664	664	2.32	2	30	13	2	0	By matching	By matching	By matching	By MS/MS	By MS/MS	By MS/MS	3.3	0	0	13.9
gi|1169929|sp|P15104.4|GLNA_HUMAN	gi|1169929|sp|P15104.4|GLNA_HUMAN	6	6	6	>gi|1169929|sp|P15104.4|GLNA_HUMAN RecName: Full=Glutamine synthetase; Short=GS; AltName: Full=Glutamate decarboxylase; AltName: Full=Glutamate--ammonia ligase	1	6	6	6	1	0	1	6	6	6	1	0	1	6	6	6	1	0	1	6	6	6	19.6	19.6	19.6	42.064	373	373	1.93	2	26			0	By matching	By matching	By matching	By MS/MS	By MS/MS	By MS/MS	2.9	0	2.9	19.6
gi|117020|sp|P00403.1|COX2_HUMAN	gi|117020|sp|P00403.1|COX2_HUMAN	4	4	4	>gi|117020|sp|P00403.1|COX2_HUMAN RecName: Full=Cytochrome c oxidase subunit 2; AltName: Full=Cytochrome c oxidase polypeptide II	1	4	4	4	0	0	1	4	4	4	0	0	1	4	4	4	0	0	1	4	4	4	18.9	18.9	18.9	25.565	227	227	1	14				0	By matching	By matching	By matching	By MS/MS	By MS/MS	By MS/MS	0	0	7.5	18.9
gi|1170217|sp|P08397.2|HEM3_HUMAN	gi|1170217|sp|P08397.2|HEM3_HUMAN	1	1	1	>gi|1170217|sp|P08397.2|HEM3_HUMAN RecName: Full=Porphobilinogen deaminase; Short=PBG-D; AltName: Full=Hydroxymethylbilane synthase; Short=HMBS; AltName: Full=Pre-uroporphyrinogen synthase	1	1	1	1	0	0	0	1	1	1	0	0	0	1	1	1	0	0	0	1	1	1	5.5	5.5	5.5	39.33	361	361	2		6			0	By matching	By matching	By matching	By MS/MS	By MS/MS	By MS/MS	0	0	0	5.5
gi|1170328|sp|P30519.2|HMOX2_HUMAN	gi|1170328|sp|P30519.2|HMOX2_HUMAN	1	1	1	>gi|1170328|sp|P30519.2|HMOX2_HUMAN RecName: Full=Heme oxygenase 2; Short=HO-2	1	1	1	1	0	0	0	1	1	1	0	0	0	1	1	1	0	0	0	1	1	1	5.1	5.1	5.1	36.032	316	316	1.5	3	3			0.00044287	By matching	By matching	By matching	By MS/MS	By MS/MS	By MS/MS	0	0	0	5.1
gi|1170586|sp|P46940.1|IQGA1_HUMAN;gi|229462887|sp|Q86VI3.2|IQGA3_HUMAN	gi|1170586|sp|P46940.1|IQGA1_HUMAN	33;1	33;1	32;0	>gi|1170586|sp|P46940.1|IQGA1_HUMAN RecName: Full=Ras GTPase-activating-like protein IQGAP1; AltName: Full=p195	2	33	33	32	5	6	8	28	29	30	5	6	8	28	29	30	4	6	8	27	28	29	28.8	28.8	28.3	189.25	1657	1657;1631	2.97	2	3	112	3	0	By MS/MS	By MS/MS	By MS/MS	By MS/MS	By MS/MS	By MS/MS	2.8	3.6	6.6	25.1
gi|125773|sp|P01609.1|KV117_HUMAN;gi|125772|sp|P01608.1|KV116_HUMAN;gi|125771|sp|P01607.1|KV115_HUMAN;gi|125764|sp|P01600.1|KV108_HUMAN;gi|125758|sp|P01594.1|KV102_HUMAN;gi|125756|sp|P01593.1|KV101_HUMAN;gi|1170720|sp|P80362.1|KV125_HUMAN	gi|125773|sp|P01609.1|KV117_HUMAN;gi|125772|sp|P01608.1|KV116_HUMAN;gi|125771|sp|P01607.1|KV115_HUMAN;gi|125764|sp|P01600.1|KV108_HUMAN;gi|125758|sp|P01594.1|KV102_HUMAN;gi|125756|sp|P01593.1|KV101_HUMAN;gi|1170720|sp|P80362.1|KV125_HUMAN	1;1;1;1;1;1;1	1;1;1;1;1;1;1	1;1;1;1;1;1;1	>gi|125773|sp|P01609.1|KV117_HUMAN RecName: Full=Ig kappa chain V-I region Scw;>gi|125772|sp|P01608.1|KV116_HUMAN RecName: Full=Ig kappa chain V-I region Roy;>gi|125771|sp|P01607.1|KV115_HUMAN RecName: Full=Ig kappa chain V-I region Rei;>gi|125764|sp|P0160	7	1	1	1	0	0	1	1	0	0	0	0	1	1	0	0	0	0	1	1	0	0	16.7	16.7	16.7	11.764	108	108;108;108;108;108;108;108	1.33	2	1			0	By matching	By matching	By MS/MS	By matching	By matching	By matching	0	0	16.7	16.7
gi|1170794|sp|P43034.2|LIS1_HUMAN	gi|1170794|sp|P43034.2|LIS1_HUMAN	5	5	5	>gi|1170794|sp|P43034.2|LIS1_HUMAN RecName: Full=Platelet-activating factor acetylhydrolase IB subunit alpha; AltName: Full=Lissencephaly-1 protein; Short=LIS-1; AltName: Full=PAF acetylhydrolase 45 kDa subunit; Short=PAF-AH 45 kDa subunit; AltName: Full=P	1	5	5	5	0	0	1	5	5	4	0	0	1	5	5	4	0	0	1	5	5	4	20	20	20	46.637	410	410	1.94	1	15			0	By matching	By matching	By matching	By MS/MS	By MS/MS	By MS/MS	0	0	3.7	20
gi|51316258|sp|Q71UM5.3|RS27L_HUMAN;gi|1171014|sp|P42677.3|RS27_HUMAN	gi|51316258|sp|Q71UM5.3|RS27L_HUMAN;gi|1171014|sp|P42677.3|RS27_HUMAN	1;1	1;1	1;1	>gi|51316258|sp|Q71UM5.3|RS27L_HUMAN RecName: Full=40S ribosomal protein S27-like;>gi|1171014|sp|P42677.3|RS27_HUMAN RecName: Full=40S ribosomal protein S27; AltName: Full=Metallopan-stimulin 1; Short=MPS-1	2	1	1	1	1	0	0	1	0	1	1	0	0	1	0	1	1	0	0	1	0	1	15.5	15.5	15.5	9.4771	84	84;84	1.6	3	1	1		0	By matching	By matching	By matching	By MS/MS	By matching	By MS/MS	15.5	0	0	15.5
gi|1171032|sp|P43246.1|MSH2_HUMAN	gi|1171032|sp|P43246.1|MSH2_HUMAN	25	25	25	>gi|1171032|sp|P43246.1|MSH2_HUMAN RecName: Full=DNA mismatch repair protein Msh2; Short=hMSH2; AltName: Full=MutS protein homolog 2	1	25	25	25	1	1	1	24	23	25	1	1	1	24	23	25	1	1	1	24	23	25	35.3	35.3	35.3	104.74	934	934	2.91	1	9	84	2	0	By matching	By matching	By matching	By MS/MS	By MS/MS	By MS/MS	1.1	1.1	1.1	35.3
gi|1171639|sp|P46926.1|GNPI1_HUMAN;gi|74723936|sp|Q8TDQ7.1|GNPI2_HUMAN	gi|1171639|sp|P46926.1|GNPI1_HUMAN;gi|74723936|sp|Q8TDQ7.1|GNPI2_HUMAN	3;2	3;2	3;2	>gi|1171639|sp|P46926.1|GNPI1_HUMAN RecName: Full=Glucosamine-6-phosphate isomerase 1; AltName: Full=Glucosamine-6-phosphate deaminase 1; Short=GNPDA 1; Short=GlcN6P deaminase 1; AltName: Full=Oscillin;>gi|74723936|sp|Q8TDQ7.1|GNPI2_HUMAN RecName: Full=Glu	2	3	3	3	0	0	0	2	3	2	0	0	0	2	3	2	0	0	0	2	3	2	14.2	14.2	14.2	32.668	289	289;276	1	7				0	By matching	By matching	By matching	By MS/MS	By MS/MS	By MS/MS	0	0	0	8.3
gi|1172027|sp|P43490.1|NAMPT_HUMAN	gi|1172027|sp|P43490.1|NAMPT_HUMAN	7	7	7	>gi|1172027|sp|P43490.1|NAMPT_HUMAN RecName: Full=Nicotinamide phosphoribosyltransferase; Short=NAmPRTase; Short=Nampt; AltName: Full=Pre-B-cell colony-enhancing factor 1; Short=Pre-B cell-enhancing factor; AltName: Full=Visfatin	1	7	7	7	0	0	0	6	5	5	0	0	0	6	5	5	0	0	0	6	5	5	20.8	20.8	20.8	55.52	491	491	4				18	0	By matching	By matching	By matching	By MS/MS	By MS/MS	By MS/MS	0	0	0	20.4
gi|1172837|sp|P43487.1|RANG_HUMAN	gi|1172837|sp|P43487.1|RANG_HUMAN	4	4	4	>gi|1172837|sp|P43487.1|RANG_HUMAN RecName: Full=Ran-specific GTPase-activating protein; AltName: Full=Ran-binding protein 1; Short=RanBP1	1	4	4	4	0	0	1	4	4	4	0	0	1	4	4	4	0	0	1	4	4	4	28.9	28.9	28.9	23.31	201	201	3.35	4		1	15	0	By matching	By matching	By matching	By MS/MS	By MS/MS	By MS/MS	0	0	6.5	28.9
gi|1172846|sp|Q09028.3|RBBP4_HUMAN	gi|1172846|sp|Q09028.3|RBBP4_HUMAN	9	6	6	>gi|1172846|sp|Q09028.3|RBBP4_HUMAN RecName: Full=Histone-binding protein RBBP4; AltName: Full=Chromatin assembly factor 1 subunit C; Short=CAF-1 subunit C; AltName: Full=Chromatin assembly factor I p48 subunit; Short=CAF-I 48 kDa subunit; Short=CAF-I p48;	1	9	6	6	2	3	3	8	8	9	2	2	2	5	5	6	2	2	2	5	5	6	34.6	27.8	27.8	47.655	425	425	3.76		3	2	28	0	By matching	By MS/MS	By MS/MS	By MS/MS	By MS/MS	By MS/MS	7.1	8.9	8.9	25.9
gi|1172922|sp|P46060.1|RAGP1_HUMAN	gi|1172922|sp|P46060.1|RAGP1_HUMAN	7	7	7	>gi|1172922|sp|P46060.1|RAGP1_HUMAN RecName: Full=Ran GTPase-activating protein 1; Short=RanGAP1	1	7	7	7	0	1	1	5	5	6	0	1	1	5	5	6	0	1	1	5	5	6	15.5	15.5	15.5	63.541	587	587	2.1		18	2		0	By matching	By matching	By matching	By MS/MS	By MS/MS	By MS/MS	0	2.2	2.2	10.7
gi|1172991|sp|P46778.2|RL21_HUMAN	gi|1172991|sp|P46778.2|RL21_HUMAN	4	4	4	>gi|1172991|sp|P46778.2|RL21_HUMAN RecName: Full=60S ribosomal protein L21	1	4	4	4	1	0	0	3	4	4	1	0	0	3	4	4	1	0	0	3	4	4	30	30	30	18.565	160	160	1	17				0	By matching	By matching	By matching	By MS/MS	By MS/MS	By MS/MS	9.4	0	0	20.6
gi|1173017|sp|P46776.2|RL27A_HUMAN	gi|1173017|sp|P46776.2|RL27A_HUMAN	2	2	2	>gi|1173017|sp|P46776.2|RL27A_HUMAN RecName: Full=60S ribosomal protein L27a	1	2	2	2	0	0	1	2	2	2	0	0	1	2	2	2	0	0	1	2	2	2	14.2	14.2	14.2	16.561	148	148	1.25	7		1		0	By matching	By matching	By matching	By MS/MS	By MS/MS	By MS/MS	0	0	6.8	14.2
gi|1173039|sp|P42766.2|RL35_HUMAN	gi|1173039|sp|P42766.2|RL35_HUMAN	2	2	2	>gi|1173039|sp|P42766.2|RL35_HUMAN RecName: Full=60S ribosomal protein L35	1	2	2	2	0	0	0	2	2	2	0	0	0	2	2	2	0	0	0	2	2	2	11.4	11.4	11.4	14.551	123	123	1.56	6	1	2		0	By matching	By matching	By matching	By MS/MS	By MS/MS	By MS/MS	0	0	0	11.4
gi|1173177|sp|P46783.1|RS10_HUMAN;gi|74752896|sp|Q9NQ39.1|RS10L_HUMAN	gi|1173177|sp|P46783.1|RS10_HUMAN;gi|74752896|sp|Q9NQ39.1|RS10L_HUMAN	3;2	3;2	3;2	>gi|1173177|sp|P46783.1|RS10_HUMAN RecName: Full=40S ribosomal protein S10;>gi|74752896|sp|Q9NQ39.1|RS10L_HUMAN PUTATIVE PSEUDOGENE: RecName: Full=Putative 40S ribosomal protein S10-like	2	3	3	3	1	1	3	3	3	3	1	1	3	3	3	3	1	1	3	3	3	3	14.5	14.5	14.5	18.898	165	165;176	1.48	16	5		2	0	By matching	By matching	By matching	By MS/MS	By MS/MS	By MS/MS	8.5	8.5	14.5	14.5
gi|1174652|sp|P23193.2|TCEA1_HUMAN;gi|28380177|sp|Q15560.1|TCEA2_HUMAN	gi|1174652|sp|P23193.2|TCEA1_HUMAN	7;1	7;1	7;1	>gi|1174652|sp|P23193.2|TCEA1_HUMAN RecName: Full=Transcription elongation factor A protein 1; AltName: Full=Transcription elongation factor S-II protein 1; AltName: Full=Transcription elongation factor TFIIS.o	2	7	7	7	0	0	0	6	7	7	0	0	0	6	7	7	0	0	0	6	7	7	24.6	24.6	24.6	33.969	301	301;299	1.94	4	25	2		0	By matching	By matching	By matching	By MS/MS	By MS/MS	By MS/MS	0	0	0	21.3
gi|1174690|sp|P42167.2|LAP2B_HUMAN;gi|1174689|sp|P42166.2|LAP2A_HUMAN	gi|1174690|sp|P42167.2|LAP2B_HUMAN;gi|1174689|sp|P42166.2|LAP2A_HUMAN	3;3	3;3	3;3	>gi|1174690|sp|P42167.2|LAP2B_HUMAN RecName: Full=Lamina-associated polypeptide 2, isoforms beta/gamma; AltName: Full=Thymopoietin, isoforms beta/gamma; Short=TP beta/gamma; AltName: Full=Thymopoietin-related peptide isoforms beta/gamma; Short=TPRP isoform	2	3	3	3	1	0	0	2	3	3	1	0	0	2	3	3	1	0	0	2	3	3	11.9	11.9	11.9	50.67	454	454;694	2	1	8	1		0	By matching	By matching	By matching	By MS/MS	By MS/MS	By matching	3.5	0	0	6.2
gi|117501|sp|P27797.1|CALR_HUMAN	gi|117501|sp|P27797.1|CALR_HUMAN	5	5	5	>gi|117501|sp|P27797.1|CALR_HUMAN RecName: Full=Calreticulin; AltName: Full=CRP55; AltName: Full=Calregulin; AltName: Full=Endoplasmic reticulum resident protein 60; Short=ERp60; AltName: Full=HACBP; AltName: Full=grp60; Flags: Precursor	1	5	5	5	0	0	0	5	5	5	0	0	0	5	5	5	0	0	0	5	5	5	19.7	19.7	19.7	48.141	417	417	4				15	0	By matching	By matching	By matching	By MS/MS	By MS/MS	By MS/MS	0	0	0	19.7
gi|117706|sp|P17302.2|CXA1_HUMAN	gi|117706|sp|P17302.2|CXA1_HUMAN	1	1	1	>gi|117706|sp|P17302.2|CXA1_HUMAN RecName: Full=Gap junction alpha-1 protein; AltName: Full=Connexin-43; Short=Cx43; AltName: Full=Gap junction 43 kDa heart protein	1	1	1	1	0	0	1	0	0	0	0	0	1	0	0	0	0	0	1	0	0	0	4.2	4.2	4.2	43.008	382	382	1	1				0	By matching	By matching	By MS/MS	By matching	By matching	By matching	0	0	4.2	0
gi|117949609|sp|O00567.4|NOP56_HUMAN	gi|117949609|sp|O00567.4|NOP56_HUMAN	2	2	2	>gi|117949609|sp|O00567.4|NOP56_HUMAN RecName: Full=Nucleolar protein 56; AltName: Full=Nucleolar protein 5A	1	2	2	2	0	0	0	2	0	2	0	0	0	2	0	2	0	0	0	2	0	2	5.4	5.4	5.4	66.049	594	594	2.2		4	1		0	By matching	By matching	By matching	By MS/MS	By matching	By matching	0	0	0	5.4
gi|117949812|sp|P41229.2|KDM5C_HUMAN;gi|17368706|sp|Q9BY66.2|KDM5D_HUMAN;gi|296439317|sp|Q9UGL1.3|KDM5B_HUMAN	gi|117949812|sp|P41229.2|KDM5C_HUMAN	8;2;1	8;2;1	8;2;1	>gi|117949812|sp|P41229.2|KDM5C_HUMAN RecName: Full=Lysine-specific demethylase 5C; AltName: Full=Histone demethylase JARID1C; AltName: Full=Jumonji/ARID domain-containing protein 1C; AltName: Full=Protein SmcX; AltName: Full=Protein Xe169	3	8	8	8	0	0	0	6	7	8	0	0	0	6	7	8	0	0	0	6	7	8	7.7	7.7	7.7	175.72	1560	1560;1539;1544	2.86		3	19		0	By matching	By matching	By matching	By MS/MS	By MS/MS	By MS/MS	0	0	0	5.3
gi|118177|sp|P01040.1|CYTA_HUMAN	gi|118177|sp|P01040.1|CYTA_HUMAN	1	1	1	>gi|118177|sp|P01040.1|CYTA_HUMAN RecName: Full=Cystatin-A; AltName: Full=Cystatin-AS; AltName: Full=Stefin-A; Contains: RecName: Full=Cystatin-A, N-terminally processed	1	1	1	1	1	1	1	1	1	0	1	1	1	1	1	0	1	1	1	1	1	0	12.2	12.2	12.2	11.006	98	98	1.17	5	1			0.00045372	By MS/MS	By matching	By matching	By MS/MS	By MS/MS	By matching	12.2	12.2	12.2	12.2
gi|118504|sp|P05091.2|ALDH2_HUMAN	gi|118504|sp|P05091.2|ALDH2_HUMAN	14	14	14	>gi|118504|sp|P05091.2|ALDH2_HUMAN RecName: Full=Aldehyde dehydrogenase, mitochondrial; AltName: Full=ALDH class 2; AltName: Full=ALDH-E2; AltName: Full=ALDHI; Flags: Precursor	1	14	14	14	0	0	6	14	13	13	0	0	6	14	13	13	0	0	6	14	13	13	38.5	38.5	38.5	56.381	517	517	3.31	7	9	16	48	0	By matching	By matching	By MS/MS	By MS/MS	By MS/MS	By MS/MS	0	0	14.9	38.5
gi|118519|sp|P16152.3|CBR1_HUMAN;gi|6014959|sp|O75828.3|CBR3_HUMAN	gi|118519|sp|P16152.3|CBR1_HUMAN	11;2	11;2	11;2	>gi|118519|sp|P16152.3|CBR1_HUMAN RecName: Full=Carbonyl reductase [NADPH] 1; AltName: Full=15-hydroxyprostaglandin dehydrogenase [NADP(+)]; AltName: Full=NADPH-dependent carbonyl reductase 1; AltName: Full=Prostaglandin 9-ketoreductase; AltName: Full=Pros	2	11	11	11	0	0	2	11	11	10	0	0	2	11	11	10	0	0	2	11	11	10	52.3	52.3	52.3	30.375	277	277;277	1.11	42	3	1		0	By matching	By matching	By MS/MS	By MS/MS	By MS/MS	By MS/MS	0	0	11.2	52.3
gi|118541|sp|P00367.2|DHE3_HUMAN;gi|13432152|sp|P49448.2|DHE4_HUMAN	gi|118541|sp|P00367.2|DHE3_HUMAN;gi|13432152|sp|P49448.2|DHE4_HUMAN	19;10	19;10	19;10	>gi|118541|sp|P00367.2|DHE3_HUMAN RecName: Full=Glutamate dehydrogenase 1, mitochondrial; Short=GDH 1; Flags: Precursor;>gi|13432152|sp|P49448.2|DHE4_HUMAN RecName: Full=Glutamate dehydrogenase 2, mitochondrial; Short=GDH 2; Flags: Precursor	2	19	19	19	9	6	9	18	19	17	9	6	9	18	19	17	9	6	9	18	19	17	45.2	45.2	45.2	61.397	558	558;558	3.42	6	24	14	93	0	By MS/MS	By MS/MS	By MS/MS	By MS/MS	By MS/MS	By MS/MS	23.3	15.1	19.2	43.7
gi|118572324|sp|P85037.1|FOXK1_HUMAN	gi|118572324|sp|P85037.1|FOXK1_HUMAN	2	2	2	>gi|118572324|sp|P85037.1|FOXK1_HUMAN RecName: Full=Forkhead box protein K1; AltName: Full=Myocyte nuclear factor; Short=MNF	1	2	2	2	0	0	0	2	1	0	0	0	0	2	1	0	0	0	0	2	1	0	4.6	4.6	4.6	75.456	733	733	2		3			0	By matching	By matching	By matching	By MS/MS	By MS/MS	By matching	0	0	0	4.6
gi|118572664|sp|Q02241.3|KIF23_HUMAN	gi|118572664|sp|Q02241.3|KIF23_HUMAN	1	1	1	>gi|118572664|sp|Q02241.3|KIF23_HUMAN RecName: Full=Kinesin-like protein KIF23; AltName: Full=Kinesin-like protein 5; AltName: Full=Mitotic kinesin-like protein 1	1	1	1	1	1	0	0	1	0	1	1	0	0	1	0	1	1	0	0	1	0	1	1.2	1.2	1.2	110.06	960	960	3			3		0	By matching	By matching	By matching	By MS/MS	By matching	By MS/MS	1.2	0	0	1.2
gi|118572715|sp|Q9Y512.3|SAM50_HUMAN	gi|118572715|sp|Q9Y512.3|SAM50_HUMAN	1	1	1	>gi|118572715|sp|Q9Y512.3|SAM50_HUMAN RecName: Full=Sorting and assembly machinery component 50 homolog; AltName: Full=Transformation-related gene 3 protein; Short=TRG-3	1	1	1	1	0	0	0	1	1	1	0	0	0	1	1	1	0	0	0	1	1	1	3.2	3.2	3.2	51.976	469	469	4				3	0.0025391	By matching	By matching	By matching	By matching	By MS/MS	By matching	0	0	0	3.2
gi|118573679|sp|Q96DV4.2|RM38_HUMAN	gi|118573679|sp|Q96DV4.2|RM38_HUMAN	2	2	2	>gi|118573679|sp|Q96DV4.2|RM38_HUMAN RecName: Full=39S ribosomal protein L38, mitochondrial; Short=L38mt; Short=MRP-L38; Flags: Precursor	1	2	2	2	0	0	0	1	1	0	0	0	0	1	1	0	0	0	0	1	1	0	6.8	6.8	6.8	44.596	380	380	2		2			0.0069106	By matching	By matching	By matching	By MS/MS	By MS/MS	By matching	0	0	0	2.4
gi|118595723|sp|Q9P212.3|PLCE1_HUMAN	gi|118595723|sp|Q9P212.3|PLCE1_HUMAN	2	2	2	>gi|118595723|sp|Q9P212.3|PLCE1_HUMAN RecName: Full=1-phosphatidylinositol 4,5-bisphosphate phosphodiesterase epsilon-1; AltName: Full=Pancreas-enriched phospholipase C; AltName: Full=Phosphoinositide phospholipase C-epsilon-1; AltName: Full=Phospholipase	1	2	2	2	0	0	1	2	1	2	0	0	1	2	1	2	0	0	1	2	1	2	1.3	1.3	1.3	258.71	2302	2302	2.12	2	3	3		0.00045434	By matching	By matching	By matching	By MS/MS	By matching	By MS/MS	0	0	0.6	1.3
gi|118601083|sp|Q13085.2|ACACA_HUMAN;gi|308153638|sp|O00763.3|ACACB_HUMAN	gi|118601083|sp|Q13085.2|ACACA_HUMAN	19;5	19;5	19;5	>gi|118601083|sp|Q13085.2|ACACA_HUMAN RecName: Full=Acetyl-CoA carboxylase 1; Short=ACC1; AltName: Full=ACC-alpha; Includes: RecName: Full=Biotin carboxylase	2	19	19	19	0	0	0	17	17	19	0	0	0	17	17	19	0	0	0	17	17	19	12.2	12.2	12.2	265.55	2346	2346;2458	3		2	54	2	0	By matching	By matching	By matching	By MS/MS	By MS/MS	By MS/MS	0	0	0	10.7
gi|118773|sp|P18858.1|DNLI1_HUMAN	gi|118773|sp|P18858.1|DNLI1_HUMAN	7	7	7	>gi|118773|sp|P18858.1|DNLI1_HUMAN RecName: Full=DNA ligase 1; AltName: Full=DNA ligase I; AltName: Full=Polydeoxyribonucleotide synthase [ATP] 1	1	7	7	7	0	1	0	6	7	6	0	1	0	6	7	6	0	1	0	6	7	6	10.7	10.7	10.7	101.73	919	919	2.91		2	21		0	By matching	By matching	By matching	By MS/MS	By MS/MS	By MS/MS	0	1	0	9
gi|119163|sp|P24534.3|EF1B_HUMAN	gi|119163|sp|P24534.3|EF1B_HUMAN	2	2	2	>gi|119163|sp|P24534.3|EF1B_HUMAN RecName: Full=Elongation factor 1-beta; Short=EF-1-beta	1	2	2	2	0	0	1	2	2	2	0	0	1	2	2	2	0	0	1	2	2	2	12.4	12.4	12.4	24.763	225	225	1.67	7	3	1	1	0	By matching	By matching	By MS/MS	By MS/MS	By MS/MS	By MS/MS	0	0	5.8	12.4
gi|119165|sp|P26641.3|EF1G_HUMAN	gi|119165|sp|P26641.3|EF1G_HUMAN	19	19	19	>gi|119165|sp|P26641.3|EF1G_HUMAN RecName: Full=Elongation factor 1-gamma; Short=EF-1-gamma; AltName: Full=eEF-1B gamma	1	19	19	19	5	3	7	18	19	19	5	3	7	18	19	19	5	3	7	18	19	19	49.7	49.7	49.7	50.118	437	437	2.72	20	64	32	56	0	By MS/MS	By MS/MS	By MS/MS	By MS/MS	By MS/MS	By MS/MS	11.4	9.6	18.1	49.4
gi|119172|sp|P13639.4|EF2_HUMAN	gi|119172|sp|P13639.4|EF2_HUMAN	39	39	38	>gi|119172|sp|P13639.4|EF2_HUMAN RecName: Full=Elongation factor 2; Short=EF-2	1	39	39	38	0	3	12	39	36	37	0	3	12	39	36	37	0	2	11	38	35	36	54.2	54.2	53	95.337	858	858	2.3	31	178	118	7	0	By matching	By matching	By MS/MS	By MS/MS	By MS/MS	By MS/MS	0	4.1	15.2	54.2
gi|119339|sp|P06733.2|ENOA_HUMAN;gi|425906077|sp|P13929.5|ENOB_HUMAN	gi|119339|sp|P06733.2|ENOA_HUMAN	23;3	23;3	20;0	>gi|119339|sp|P06733.2|ENOA_HUMAN RecName: Full=Alpha-enolase; AltName: Full=2-phospho-D-glycerate hydro-lyase; AltName: Full=C-myc promoter-binding protein; AltName: Full=Enolase 1; AltName: Full=MBP-1; AltName: Full=MPB-1; AltName: Full=Non-neural enolas	2	23	23	20	13	14	10	22	21	22	13	14	10	22	21	22	13	12	9	19	19	20	62.9	62.9	50.2	47.168	434	434;434	3.37	15	39	39	163	0	By MS/MS	By MS/MS	By MS/MS	By MS/MS	By MS/MS	By MS/MS	34.3	44.2	34.1	62.9
gi|119360|sp|P14625.1|ENPL_HUMAN;gi|74706932|sp|Q58FF3.1|ENPLL_HUMAN	gi|119360|sp|P14625.1|ENPL_HUMAN	26;1	24;1	24;1	>gi|119360|sp|P14625.1|ENPL_HUMAN RecName: Full=Endoplasmin; AltName: Full=94 kDa glucose-regulated protein; Short=GRP-94; AltName: Full=Heat shock protein 90 kDa beta member 1; AltName: Full=Tumor rejection antigen 1; AltName: Full=gp96 homolog; Flags: Pr	2	26	24	24	6	5	4	25	25	21	5	5	4	23	23	19	5	5	4	23	23	19	35.1	33.4	33.4	92.468	803	803;399	2.47	4	64	62	2	0	By MS/MS	By MS/MS	By matching	By MS/MS	By MS/MS	By MS/MS	8.2	6.7	5.7	35
gi|119364606|sp|Q12756.2|KIF1A_HUMAN	gi|119364606|sp|Q12756.2|KIF1A_HUMAN	15	15	14	>gi|119364606|sp|Q12756.2|KIF1A_HUMAN RecName: Full=Kinesin-like protein KIF1A; AltName: Full=Axonal transporter of synaptic vesicles; AltName: Full=Microtubule-based motor KIF1A; AltName: Full=Unc-104- and KIF1A-related protein; Short=hUnc-104	1	15	15	14	0	0	0	14	15	14	0	0	0	14	15	14	0	0	0	14	14	13	11.9	11.9	11.2	191.06	1690	1690	2.96		2	45		0	By matching	By matching	By matching	By MS/MS	By MS/MS	By MS/MS	0	0	0	11.2
gi|119364633|sp|P50542.3|PEX5_HUMAN	gi|119364633|sp|P50542.3|PEX5_HUMAN	2	2	2	>gi|119364633|sp|P50542.3|PEX5_HUMAN RecName: Full=Peroxisomal targeting signal 1 receptor; Short=PTS1 receptor; Short=PTS1R; AltName: Full=PTS1-BP; AltName: Full=Peroxin-5; AltName: Full=Peroxisomal C-terminal targeting signal import receptor; AltName: Fu	1	2	2	2	0	0	0	1	1	1	0	0	0	1	1	1	0	0	0	1	1	1	4.7	4.7	4.7	70.864	639	639	2		3			0	By matching	By matching	By matching	By MS/MS	By matching	By MS/MS	0	0	0	2
gi|119369487|sp|Q0JRZ9.2|FCHO2_HUMAN	gi|119369487|sp|Q0JRZ9.2|FCHO2_HUMAN	1	1	1	>gi|119369487|sp|Q0JRZ9.2|FCHO2_HUMAN RecName: Full=F-BAR domain only protein 2	1	1	1	1	0	0	0	1	0	1	0	0	0	1	0	1	0	0	0	1	0	1	3	3	3	88.923	810	810	2		2			0	By matching	By matching	By matching	By MS/MS	By matching	By MS/MS	0	0	0	3
gi|119370332|sp|P01024.2|CO3_HUMAN	gi|119370332|sp|P01024.2|CO3_HUMAN	20	20	17	>gi|119370332|sp|P01024.2|CO3_HUMAN RecName: Full=Complement C3; AltName: Full=C3 and PZP-like alpha-2-macroglobulin domain-containing protein 1; Contains: RecName: Full=Complement C3 beta chain; Contains: RecName: Full=C3-beta-c; Short=C3bc; Contains: Rec	1	20	20	17	0	0	20	2	4	1	0	0	20	2	4	1	0	0	17	0	3	1	15.2	15.2	13.7	187.15	1663	1663	1.23	24	5	1		0	By matching	By matching	By MS/MS	By matching	By matching	By matching	0	0	15.2	0.8
gi|119371160|sp|Q96CN7.3|ISOC1_HUMAN	gi|119371160|sp|Q96CN7.3|ISOC1_HUMAN	3	3	3	>gi|119371160|sp|Q96CN7.3|ISOC1_HUMAN RecName: Full=Isochorismatase domain-containing protein 1	1	3	3	3	0	0	0	3	2	2	0	0	0	3	2	2	0	0	0	3	2	2	12.8	12.8	12.8	32.236	298	298	1	7				0	By matching	By matching	By matching	By MS/MS	By MS/MS	By matching	0	0	0	12.8
gi|119530|sp|P13667.2|PDIA4_HUMAN	gi|119530|sp|P13667.2|PDIA4_HUMAN	33	33	33	>gi|119530|sp|P13667.2|PDIA4_HUMAN RecName: Full=Protein disulfide-isomerase A4; AltName: Full=Endoplasmic reticulum resident protein 70; Short=ER protein 70; Short=ERp70; AltName: Full=Endoplasmic reticulum resident protein 72; Short=ER protein 72; Short=	1	33	33	33	6	9	4	31	31	29	6	9	4	31	31	29	6	9	4	31	31	29	48.8	48.8	48.8	72.932	645	645	2.11	11	144	30	1	0	By MS/MS	By MS/MS	By MS/MS	By MS/MS	By MS/MS	By MS/MS	11	15.8	9	45.6
gi|119554|sp|P28482.3|MK01_HUMAN;gi|215274102|sp|P31152.2|MK04_HUMAN;gi|2499596|sp|Q16659.1|MK06_HUMAN	gi|119554|sp|P28482.3|MK01_HUMAN	8;1;1	8;1;1	6;0;0	>gi|119554|sp|P28482.3|MK01_HUMAN RecName: Full=Mitogen-activated protein kinase 1; Short=MAP kinase 1; Short=MAPK 1; AltName: Full=ERT1; AltName: Full=Extracellular signal-regulated kinase 2; Short=ERK-2; AltName: Full=MAP kinase isoform p42; Short=p42-MA	3	8	8	6	0	0	1	8	8	7	0	0	1	8	8	7	0	0	1	6	6	5	23.1	23.1	17.8	41.389	360	360;587;721	2	1	25	1		0	By matching	By matching	By matching	By MS/MS	By MS/MS	By MS/MS	0	0	2.5	23.1
gi|119636|sp|P13804.1|ETFA_HUMAN	gi|119636|sp|P13804.1|ETFA_HUMAN	8	8	8	>gi|119636|sp|P13804.1|ETFA_HUMAN RecName: Full=Electron transfer flavoprotein subunit alpha, mitochondrial; Short=Alpha-ETF; Flags: Precursor	1	8	8	8	0	0	0	6	8	7	0	0	0	6	8	7	0	0	0	6	8	7	35.1	35.1	35.1	35.079	333	333	1	23				0	By matching	By matching	By matching	By MS/MS	By MS/MS	By MS/MS	0	0	0	27.3
gi|119778|sp|P16930.2|FAAA_HUMAN	gi|119778|sp|P16930.2|FAAA_HUMAN	1	1	1	>gi|119778|sp|P16930.2|FAAA_HUMAN RecName: Full=Fumarylacetoacetase; Short=FAA; AltName: Full=Beta-diketonase; AltName: Full=Fumarylacetoacetate hydrolase	1	1	1	1	0	0	0	1	1	1	0	0	0	1	1	1	0	0	0	1	1	1	2.9	2.9	2.9	46.374	419	419	2		3			0	By matching	By matching	By matching	By matching	By MS/MS	By MS/MS	0	0	0	2.9
gi|120516|sp|P02794.2|FRIH_HUMAN	gi|120516|sp|P02794.2|FRIH_HUMAN	5	5	5	>gi|120516|sp|P02794.2|FRIH_HUMAN RecName: Full=Ferritin heavy chain; Short=Ferritin H subunit; AltName: Full=Cell proliferation-inducing gene 15 protein; Contains: RecName: Full=Ferritin heavy chain, N-terminally processed	1	5	5	5	0	0	0	5	5	5	0	0	0	5	5	5	0	0	0	5	5	5	31.1	31.1	31.1	21.225	183	183	1.78	20	4	12		0	By matching	By matching	By matching	By MS/MS	By MS/MS	By MS/MS	0	0	0	31.1
gi|120523|sp|P02792.2|FRIL_HUMAN	gi|120523|sp|P02792.2|FRIL_HUMAN	3	3	3	>gi|120523|sp|P02792.2|FRIL_HUMAN RecName: Full=Ferritin light chain; Short=Ferritin L subunit	1	3	3	3	1	1	0	3	3	3	1	1	0	3	3	3	1	1	0	3	3	3	23.4	23.4	23.4	20.019	175	175	1.58	13	1	5		0	By matching	By matching	By matching	By MS/MS	By MS/MS	By MS/MS	8.6	8.6	0	23.4
gi|120649|sp|P04406.3|G3P_HUMAN	gi|120649|sp|P04406.3|G3P_HUMAN	16	16	16	>gi|120649|sp|P04406.3|G3P_HUMAN RecName: Full=Glyceraldehyde-3-phosphate dehydrogenase; Short=GAPDH; AltName: Full=Peptidyl-cysteine S-nitrosylase GAPDH	1	16	16	16	7	4	6	14	16	16	7	4	6	14	16	16	7	4	6	14	16	16	66.3	66.3	66.3	36.053	335	335	2.15	35	66	27	15	0	By MS/MS	By MS/MS	By MS/MS	By MS/MS	By MS/MS	By MS/MS	27.5	14.6	23.3	54.6
gi|120996|sp|P08754.3|GNAI3_HUMAN	gi|120996|sp|P08754.3|GNAI3_HUMAN	3	3	2	>gi|120996|sp|P08754.3|GNAI3_HUMAN RecName: Full=Guanine nucleotide-binding protein G(k) subunit alpha; AltName: Full=G(i) alpha-3	1	3	3	2	0	0	0	1	3	3	0	0	0	1	3	3	0	0	0	1	2	2	11.9	11.9	8.8	40.532	354	354	2		7			0	By matching	By matching	By matching	By matching	By MS/MS	By MS/MS	0	0	0	4.2
gi|121023|sp|P04899.3|GNAI2_HUMAN	gi|121023|sp|P04899.3|GNAI2_HUMAN	3	2	2	>gi|121023|sp|P04899.3|GNAI2_HUMAN RecName: Full=Guanine nucleotide-binding protein G(i) subunit alpha-2; AltName: Full=Adenylate cyclase-inhibiting G alpha protein	1	3	2	2	0	0	0	1	3	2	0	0	0	1	2	1	0	0	0	1	2	1	11.3	8.2	8.2	40.45	355	355	2		4			0.00044131	By matching	By matching	By matching	By MS/MS	By MS/MS	By matching	0	0	0	4.2
gi|121039|sp|P01857.1|IGHG1_HUMAN	gi|121039|sp|P01857.1|IGHG1_HUMAN	9	9	6	>gi|121039|sp|P01857.1|IGHG1_HUMAN RecName: Full=Ig gamma-1 chain C region	1	9	9	6	1	1	9	1	0	2	1	1	9	1	0	2	1	1	6	0	0	1	46.7	46.7	32.7	36.105	330	330	1.29	14	1	2		0	By matching	By matching	By MS/MS	By matching	By matching	By MS/MS	3.6	3.6	46.7	4.2
gi|121116|sp|P06396.1|GELS_HUMAN;CON__Q3SX14	gi|121116|sp|P06396.1|GELS_HUMAN;CON__Q3SX14	4;2	4;2	4;2	>gi|121116|sp|P06396.1|GELS_HUMAN RecName: Full=Gelsolin; AltName: Full=AGEL; AltName: Full=Actin-depolymerizing factor; Short=ADF; AltName: Full=Brevin; Flags: Precursor;>Q3SX14 TREMBL:Q3SX14 (Bos taurus) Similar to Gelsolin	2	4	4	4	0	0	4	2	1	2	0	0	4	2	1	2	0	0	4	2	1	2	8.2	8.2	8.2	85.696	782	782;781	1.56	4	5			0	By matching	By matching	By MS/MS	By MS/MS	By MS/MS	By MS/MS	0	0	8.2	4.5
gi|121688|sp|P15170.1|ERF3A_HUMAN;gi|182647413|sp|Q8IYD1.2|ERF3B_HUMAN	gi|121688|sp|P15170.1|ERF3A_HUMAN;gi|182647413|sp|Q8IYD1.2|ERF3B_HUMAN	8;4	8;4	8;4	>gi|121688|sp|P15170.1|ERF3A_HUMAN RecName: Full=Eukaryotic peptide chain release factor GTP-binding subunit ERF3A; Short=Eukaryotic peptide chain release factor subunit 3a; Short=eRF3a; AltName: Full=G1 to S phase transition protein 1 homolog;>gi|18264741	2	8	8	8	0	0	0	8	8	8	0	0	0	8	8	8	0	0	0	8	8	8	24.6	24.6	24.6	55.755	499	499;628	2.1	1	25	4		0	By matching	By matching	By matching	By MS/MS	By MS/MS	By MS/MS	0	0	0	24.6
gi|121746|sp|P09211.2|GSTP1_HUMAN	gi|121746|sp|P09211.2|GSTP1_HUMAN	5	5	5	>gi|121746|sp|P09211.2|GSTP1_HUMAN RecName: Full=Glutathione S-transferase P; AltName: Full=GST class-pi; AltName: Full=GSTP1-1	1	5	5	5	0	1	4	4	4	5	0	1	4	4	4	5	0	1	4	4	4	5	36.2	36.2	36.2	23.356	210	210	2.12	22	3	3	12	0	By matching	By matching	By MS/MS	By MS/MS	By MS/MS	By MS/MS	0	4.8	27.1	27.1
gi|121897|sp|P07305.3|H10_HUMAN	gi|121897|sp|P07305.3|H10_HUMAN	1	1	1	>gi|121897|sp|P07305.3|H10_HUMAN RecName: Full=Histone H1.0; AltName: Full=Histone H1; AltName: Full=Histone H1(0); Contains: RecName: Full=Histone H1.0, N-terminally processed	1	1	1	1	0	0	0	1	1	1	0	0	0	1	1	1	0	0	0	1	1	1	6.7	6.7	6.7	20.863	194	194	1	3				0.006544	By matching	By matching	By matching	By MS/MS	By MS/MS	By matching	0	0	0	6.7
gi|121919|sp|P10412.2|H14_HUMAN	gi|121919|sp|P10412.2|H14_HUMAN	9	3	3	>gi|121919|sp|P10412.2|H14_HUMAN RecName: Full=Histone H1.4; AltName: Full=Histone H1b; AltName: Full=Histone H1s-4	1	9	3	3	2	4	6	9	9	9	0	0	2	3	3	3	0	0	2	3	3	3	26.9	9.6	9.6	21.865	219	219	1.08	11	1			0	By matching	By matching	By MS/MS	By MS/MS	By MS/MS	By MS/MS	12.8	16.9	26.9	26.9
gi|121940398|sp|Q0PNE2.1|ELP6_HUMAN	gi|121940398|sp|Q0PNE2.1|ELP6_HUMAN	1	1	1	>gi|121940398|sp|Q0PNE2.1|ELP6_HUMAN RecName: Full=Elongator complex protein 6; AltName: Full=Angiotonin-transactivated protein 1; AltName: Full=Protein TMEM103	1	1	1	1	0	0	0	0	0	1	0	0	0	0	0	1	0	0	0	0	0	1	5.6	5.6	5.6	29.793	266	266	1	1				0.00045188	By matching	By matching	By matching	By matching	By matching	By MS/MS	0	0	0	0
gi|121940728|sp|Q1KMD3.1|HNRL2_HUMAN	gi|121940728|sp|Q1KMD3.1|HNRL2_HUMAN	4	4	4	>gi|121940728|sp|Q1KMD3.1|HNRL2_HUMAN RecName: Full=Heterogeneous nuclear ribonucleoprotein U-like protein 2; AltName: Full=Scaffold-attachment factor A2; Short=SAF-A2	1	4	4	4	1	1	0	3	3	3	1	1	0	3	3	3	1	1	0	3	3	3	9.6	9.6	9.6	85.104	747	747	2.91		1	10		0	By matching	By matching	By matching	By MS/MS	By MS/MS	By MS/MS	2.1	2.1	0	7.8
gi|121941488|sp|Q2M3G4.1|SHRM1_HUMAN	gi|121941488|sp|Q2M3G4.1|SHRM1_HUMAN	1	1	1	>gi|121941488|sp|Q2M3G4.1|SHRM1_HUMAN RecName: Full=Protein Shroom1; AltName: Full=Apical protein 2	1	1	1	1	0	0	0	0	0	1	0	0	0	0	0	1	0	0	0	0	0	1	1.9	1.9	1.9	90.785	852	852	3			1		0	By matching	By matching	By matching	By matching	By matching	By MS/MS	0	0	0	0
gi|121941741|sp|Q2TAA2.1|IAH1_HUMAN	gi|121941741|sp|Q2TAA2.1|IAH1_HUMAN	3	3	3	>gi|121941741|sp|Q2TAA2.1|IAH1_HUMAN RecName: Full=Isoamyl acetate-hydrolyzing esterase 1 homolog	1	3	3	3	0	0	0	3	1	2	0	0	0	3	1	2	0	0	0	3	1	2	16.1	16.1	16.1	27.598	248	248	4				6	0	By matching	By matching	By matching	By MS/MS	By matching	By matching	0	0	0	16.1
gi|121944459|sp|Q8IYS1.2|P20D2_HUMAN	gi|121944459|sp|Q8IYS1.2|P20D2_HUMAN	3	3	3	>gi|121944459|sp|Q8IYS1.2|P20D2_HUMAN RecName: Full=Peptidase M20 domain-containing protein 2; AltName: Full=Aminoacylase-1-like protein 2	1	3	3	3	0	0	0	3	2	2	0	0	0	3	2	2	0	0	0	3	2	2	8	8	8	47.776	436	436	4				7	0	By matching	By matching	By matching	By MS/MS	By MS/MS	By MS/MS	0	0	0	8
gi|121945944|sp|Q4G0J3.1|LARP7_HUMAN	gi|121945944|sp|Q4G0J3.1|LARP7_HUMAN	10	10	10	>gi|121945944|sp|Q4G0J3.1|LARP7_HUMAN RecName: Full=La-related protein 7; AltName: Full=La ribonucleoprotein domain family member 7; AltName: Full=P-TEFb-interaction protein for 7SK stability; Short=PIP7S	1	10	10	10	1	1	0	10	10	10	1	1	0	10	10	10	1	1	0	10	10	10	24.9	24.9	24.9	66.898	582	582	2.24	2	35	14		0	By matching	By matching	By matching	By MS/MS	By MS/MS	By MS/MS	3.4	1.5	0	24.9
gi|121947590|sp|Q29RF7.1|PDS5A_HUMAN	gi|121947590|sp|Q29RF7.1|PDS5A_HUMAN	6	6	6	>gi|121947590|sp|Q29RF7.1|PDS5A_HUMAN RecName: Full=Sister chromatid cohesion protein PDS5 homolog A; AltName: Full=Cell proliferation-inducing gene 54 protein; AltName: Full=Sister chromatid cohesion protein 112; Short=SCC-112	1	6	6	6	0	0	2	6	5	5	0	0	2	6	5	5	0	0	2	6	5	5	8.6	8.6	8.6	150.83	1337	1337	3			19		0	By matching	By matching	By matching	By MS/MS	By MS/MS	By MS/MS	0	0	2.9	8.6
gi|121948339|sp|Q2NKX8.1|ERC6L_HUMAN	gi|121948339|sp|Q2NKX8.1|ERC6L_HUMAN	5	5	5	>gi|121948339|sp|Q2NKX8.1|ERC6L_HUMAN RecName: Full=DNA excision repair protein ERCC-6-like; AltName: Full=ATP-dependent helicase ERCC6-like; AltName: Full=PLK1-interacting checkpoint helicase; AltName: Full=Tumor antigen BJ-HCC-15	1	5	5	5	0	0	0	3	3	5	0	0	0	3	3	5	0	0	0	3	3	5	6.3	6.3	6.3	141.1	1250	1250	3			11		0	By matching	By matching	By matching	By MS/MS	By MS/MS	By MS/MS	0	0	0	4.1
gi|121948971|sp|Q2NL82.1|TSR1_HUMAN	gi|121948971|sp|Q2NL82.1|TSR1_HUMAN	6	6	6	>gi|121948971|sp|Q2NL82.1|TSR1_HUMAN RecName: Full=Pre-rRNA-processing protein TSR1 homolog	1	6	6	6	0	0	0	4	5	5	0	0	0	4	5	5	0	0	0	4	5	5	9.6	9.6	9.6	91.809	804	804	2.64		10	10	2	0	By matching	By matching	By matching	By MS/MS	By MS/MS	By MS/MS	0	0	0	6.2
gi|121949310|sp|A0FGR8.1|ESYT2_HUMAN	gi|121949310|sp|A0FGR8.1|ESYT2_HUMAN	3	3	3	>gi|121949310|sp|A0FGR8.1|ESYT2_HUMAN RecName: Full=Extended synaptotagmin-2; Short=E-Syt2; AltName: Full=Chr2Syt	1	3	3	3	0	0	0	2	3	2	0	0	0	2	3	2	0	0	0	2	3	2	3.7	3.7	3.7	102.36	921	921	2.33		6	3		0	By matching	By matching	By matching	By MS/MS	By MS/MS	By MS/MS	0	0	0	2.6
gi|121949450|sp|A0AVT1.1|UBA6_HUMAN	gi|121949450|sp|A0AVT1.1|UBA6_HUMAN	13	13	13	>gi|121949450|sp|A0AVT1.1|UBA6_HUMAN RecName: Full=Ubiquitin-like modifier-activating enzyme 6; Short=Ubiquitin-activating enzyme 6; AltName: Full=Monocyte protein 4; Short=MOP-4; AltName: Full=Ubiquitin-activating enzyme E1-like protein 2; Short=E1-L2	1	13	13	13	0	1	0	11	12	10	0	1	0	11	12	10	0	1	0	11	12	10	15.4	15.4	15.4	117.97	1052	1052	2.91	1	2	40		0	By matching	By matching	By matching	By MS/MS	By MS/MS	By MS/MS	0	1.2	0	12.3
gi|74751984|sp|Q96KK5.3|H2A1H_HUMAN;gi|12585257|sp|Q99878.3|H2A1J_HUMAN;gi|74733131|sp|Q9BTM1.1|H2AJ_HUMAN;gi|47117890|sp|Q16777.4|H2A2C_HUMAN;gi|83288406|sp|P0C0S8.2|H2A1_HUMAN;gi|74757558|sp|Q6FI13.3|H2A2A_HUMAN;gi|74749897|sp|Q7L7L0.3|H2A3_HUMAN;gi|12643341|sp|Q93077.3|H2A1C_HUMAN;gi|124028530|sp|P04908.2|H2A1B_HUMAN;gi|121978|sp|P20671.2|H2A1D_HUMAN;gi|83288408|sp|P0C0S5.2|H2AZ_HUMAN;gi|74749…	gi|74751984|sp|Q96KK5.3|H2A1H_HUMAN;gi|12585257|sp|Q99878.3|H2A1J_HUMAN;gi|74733131|sp|Q9BTM1.1|H2AJ_HUMAN;gi|47117890|sp|Q16777.4|H2A2C_HUMAN;gi|83288406|sp|P0C0S8.2|H2A1_HUMAN;gi|74757558|sp|Q6FI13.3|H2A2A_HUMAN;gi|74749897|sp|Q7L7L0.3|H2A3_HUMAN;gi|12643341|sp|Q93077.3|H2A1C_HUMAN;gi|124028530|sp|P04908.2|H2A1B_HUMAN;gi|121978|sp|P20671.2|H2A1D_HUMAN;gi|83288408|sp|P0C0S5.2|H2AZ_HUMAN;gi|74749…	2;2;2;2;2;2;2;2;2;2;1;1;1;1;1	2;2;2;2;2;2;2;2;2;2;1;1;1;1;1	2;2;2;2;2;2;2;2;2;2;1;1;1;1;1	>gi|74751984|sp|Q96KK5.3|H2A1H_HUMAN RecName: Full=Histone H2A type 1-H; AltName: Full=Histone H2A/s;>gi|12585257|sp|Q99878.3|H2A1J_HUMAN RecName: Full=Histone H2A type 1-J; AltName: Full=Histone H2A/e;>gi|74733131|sp|Q9BTM1.1|H2AJ_HUMAN RecName: Full=Hist	15	2	2	2	1	1	2	2	2	2	1	1	2	2	2	2	1	1	2	2	2	2	21.9	21.9	21.9	13.906	128	128;128;129;129;130;130;130;130;130;130;128;128;130;131;143	1.55	15		4	1	0	By MS/MS	By matching	By MS/MS	By MS/MS	By MS/MS	By MS/MS	7	7	21.9	21.9
gi|122064944|sp|Q6IQ22.3|RAB12_HUMAN	gi|122064944|sp|Q6IQ22.3|RAB12_HUMAN	1	1	1	>gi|122064944|sp|Q6IQ22.3|RAB12_HUMAN RecName: Full=Ras-related protein Rab-12	1	1	1	1	0	0	0	1	1	1	0	0	0	1	1	1	0	0	0	1	1	1	8.2	8.2	8.2	27.248	244	244	1	3				0.0057471	By matching	By matching	By matching	By MS/MS	By MS/MS	By matching	0	0	0	8.2
gi|122065170|sp|Q96N67.4|DOCK7_HUMAN	gi|122065170|sp|Q96N67.4|DOCK7_HUMAN	8	8	8	>gi|122065170|sp|Q96N67.4|DOCK7_HUMAN RecName: Full=Dedicator of cytokinesis protein 7	1	8	8	8	1	2	0	8	8	8	1	2	0	8	8	8	1	2	0	8	8	8	5.7	5.7	5.7	242.56	2140	2140	2.9		3	27		0	By matching	By matching	By matching	By MS/MS	By MS/MS	By MS/MS	0.7	1.2	0	5.7
gi|122065202|sp|Q8N4P3.3|MESH1_HUMAN	gi|122065202|sp|Q8N4P3.3|MESH1_HUMAN	1	1	1	>gi|122065202|sp|Q8N4P3.3|MESH1_HUMAN RecName: Full=Guanosine-3,5-bis(diphosphate) 3-pyrophosphohydrolase MESH1; AltName: Full=HD domain-containing protein 3; AltName: Full=Metazoan SpoT homolog 1; Short=MESH1; AltName: Full=Penta-phosphate guanosine-3	1	1	1	1	0	0	0	1	1	0	0	0	0	1	1	0	0	0	0	1	1	0	8.9	8.9	8.9	20.329	179	179	1	2				0.00044643	By matching	By matching	By matching	By MS/MS	By MS/MS	By matching	0	0	0	8.9
gi|122065628|sp|Q9UM54.4|MYO6_HUMAN	gi|122065628|sp|Q9UM54.4|MYO6_HUMAN	8	8	8	>gi|122065628|sp|Q9UM54.4|MYO6_HUMAN RecName: Full=Unconventional myosin-VI; AltName: Full=Unconventional myosin-6	1	8	8	8	1	1	0	7	6	8	1	1	0	7	6	8	1	1	0	7	6	8	8.6	8.6	8.6	149.69	1294	1294	3			25		0	By matching	By matching	By matching	By MS/MS	By MS/MS	By MS/MS	1.2	1.2	0	8.6
gi|122066680|sp|Q9P0L0.3|VAPA_HUMAN	gi|122066680|sp|Q9P0L0.3|VAPA_HUMAN	3	2	2	>gi|122066680|sp|Q9P0L0.3|VAPA_HUMAN RecName: Full=Vesicle-associated membrane protein-associated protein A; Short=VAMP-A; Short=VAMP-associated protein A; Short=VAP-A; AltName: Full=33 kDa VAMP-associated protein; Short=VAP-33	1	3	2	2	0	0	0	3	3	3	0	0	0	2	2	2	0	0	0	2	2	2	13.3	13.3	13.3	27.893	249	249	1	6				0	By matching	By matching	By matching	By matching	By MS/MS	By matching	0	0	0	13.3
gi|12229771|sp|Q9Y678.1|COPG1_HUMAN	gi|12229771|sp|Q9Y678.1|COPG1_HUMAN	17	17	16	>gi|12229771|sp|Q9Y678.1|COPG1_HUMAN RecName: Full=Coatomer subunit gamma-1; AltName: Full=Gamma-1-coat protein; Short=Gamma-1-COP	1	17	17	16	0	0	0	12	16	15	0	0	0	12	16	15	0	0	0	11	15	14	27.8	27.8	26.4	97.717	874	874	2.56		29	37		0	By matching	By matching	By matching	By MS/MS	By MS/MS	By MS/MS	0	0	0	18.5
gi|12229837|sp|Q9P003.1|CNIH4_HUMAN	gi|12229837|sp|Q9P003.1|CNIH4_HUMAN	1	1	1	>gi|12229837|sp|Q9P003.1|CNIH4_HUMAN RecName: Full=Protein cornichon homolog 4; Short=CNIH-4; AltName: Full=Cornichon family AMPA receptor auxiliary protein 4	1	1	1	1	0	0	0	1	1	1	0	0	0	1	1	1	0	0	0	1	1	1	14.4	14.4	14.4	16.093	139	139	1	3				0.00044783	By matching	By matching	By matching	By MS/MS	By matching	By matching	0	0	0	14.4
gi|12229870|sp|Q9UI09.1|NDUAC_HUMAN	gi|12229870|sp|Q9UI09.1|NDUAC_HUMAN	1	1	1	>gi|12229870|sp|Q9UI09.1|NDUAC_HUMAN RecName: Full=NADH dehydrogenase [ubiquinone] 1 alpha subcomplex subunit 12; AltName: Full=13 kDa differentiation-associated protein; AltName: Full=Complex I-B17.2; Short=CI-B17.2; Short=CIB17.2; AltName: Full=NADH-ubiq	1	1	1	1	0	0	0	1	1	0	0	0	0	1	1	0	0	0	0	1	1	0	6.2	6.2	6.2	17.114	145	145	1	4				1	By matching	By matching	By matching	By MS/MS	By matching	By matching	0	0	0	6.2
gi|12229875|sp|Q13310.1|PABP4_HUMAN	gi|12229875|sp|Q13310.1|PABP4_HUMAN	12	5	5	>gi|12229875|sp|Q13310.1|PABP4_HUMAN RecName: Full=Polyadenylate-binding protein 4; Short=PABP-4; Short=Poly(A)-binding protein 4; AltName: Full=Activated-platelet protein 1; Short=APP-1; AltName: Full=Inducible poly(A)-binding protein; Short=iPABP	1	12	5	5	4	4	1	12	12	11	0	0	0	5	5	4	0	0	0	5	5	4	25.5	10.9	10.9	70.782	644	644	2.14		18	3		0	By matching	By matching	By matching	By MS/MS	By MS/MS	By MS/MS	6.1	6.1	2.6	25.5
gi|12230339|sp|P57740.1|NU107_HUMAN	gi|12230339|sp|P57740.1|NU107_HUMAN	2	2	2	>gi|12230339|sp|P57740.1|NU107_HUMAN RecName: Full=Nuclear pore complex protein Nup107; AltName: Full=107 kDa nucleoporin; AltName: Full=Nucleoporin Nup107	1	2	2	2	0	0	0	2	2	2	0	0	0	2	2	2	0	0	0	2	2	2	3	3	3	106.37	925	925	3			6		0	By matching	By matching	By matching	By MS/MS	By MS/MS	By MS/MS	0	0	0	3
gi|12230369|sp|O96008.1|TOM40_HUMAN	gi|12230369|sp|O96008.1|TOM40_HUMAN	4	4	4	>gi|12230369|sp|O96008.1|TOM40_HUMAN RecName: Full=Mitochondrial import receptor subunit TOM40 homolog; AltName: Full=Protein Haymaker; AltName: Full=Translocase of outer membrane 40 kDa subunit homolog; AltName: Full=p38.5	1	4	4	4	0	0	0	4	4	4	0	0	0	4	4	4	0	0	0	4	4	4	14.4	14.4	14.4	37.893	361	361	1.92	1	12			0	By matching	By matching	By matching	By MS/MS	By MS/MS	By MS/MS	0	0	0	14.4
gi|12230426|sp|O94903.1|PROSC_HUMAN	gi|12230426|sp|O94903.1|PROSC_HUMAN	3	3	3	>gi|12230426|sp|O94903.1|PROSC_HUMAN RecName: Full=Proline synthase co-transcribed bacterial homolog protein	1	3	3	3	0	0	0	2	3	1	0	0	0	2	3	1	0	0	0	2	3	1	15.6	15.6	15.6	30.344	275	275	1	6				0	By matching	By matching	By matching	By MS/MS	By MS/MS	By MS/MS	0	0	0	10.9
gi|12230547|sp|O43390.1|HNRPR_HUMAN	gi|12230547|sp|O43390.1|HNRPR_HUMAN	11	8	8	>gi|12230547|sp|O43390.1|HNRPR_HUMAN RecName: Full=Heterogeneous nuclear ribonucleoprotein R; Short=hnRNP R	1	11	8	8	2	5	3	9	11	9	1	3	1	6	8	6	1	3	1	6	8	6	20.7	16.1	16.1	70.942	633	633	2.36		24	11	1	0	By MS/MS	By MS/MS	By MS/MS	By MS/MS	By MS/MS	By MS/MS	3.6	9.2	4.9	16.6
gi|12230985|sp|P05089.2|ARGI1_HUMAN	gi|12230985|sp|P05089.2|ARGI1_HUMAN	3	3	3	>gi|12230985|sp|P05089.2|ARGI1_HUMAN RecName: Full=Arginase-1; AltName: Full=Liver-type arginase; AltName: Full=Type I arginase	1	3	3	3	3	3	3	3	2	2	3	3	3	3	2	2	3	3	3	3	2	2	7.1	7.1	7.1	34.735	322	322	1.78	14	5	8		0	By MS/MS	By MS/MS	By MS/MS	By MS/MS	By MS/MS	By MS/MS	7.1	7.1	7.1	7.1
gi|12231007|sp|P31944.2|CASPE_HUMAN	gi|12231007|sp|P31944.2|CASPE_HUMAN	2	2	2	>gi|12231007|sp|P31944.2|CASPE_HUMAN RecName: Full=Caspase-14; Short=CASP-14; Contains: RecName: Full=Caspase-14 subunit p17, mature form; Contains: RecName: Full=Caspase-14 subunit p10, mature form; Contains: RecName: Full=Caspase-14 subunit p20, intermed	1	2	2	2	1	1	0	0	1	0	1	1	0	0	1	0	1	1	0	0	1	0	8.7	8.7	8.7	27.679	242	242	1.8	3	1		1	0.006919	By matching	By MS/MS	By matching	By matching	By MS/MS	By matching	4.1	4.1	0	0
gi|12231020|sp|P30419.2|NMT1_HUMAN	gi|12231020|sp|P30419.2|NMT1_HUMAN	5	5	5	>gi|12231020|sp|P30419.2|NMT1_HUMAN RecName: Full=Glycylpeptide N-tetradecanoyltransferase 1; AltName: Full=Myristoyl-CoA:protein N-myristoyltransferase 1; Short=NMT 1; Short=Type I N-myristoyltransferase; AltName: Full=Peptide N-myristoyltransferase 1	1	5	5	5	1	1	0	4	3	4	1	1	0	4	3	4	1	1	0	4	3	4	12.9	12.9	12.9	56.806	496	496	2.2		13	1	1	0	By matching	By MS/MS	By matching	By MS/MS	By MS/MS	By MS/MS	2.6	4.2	0	10.5
gi|12231037|sp|Q92542.2|NICA_HUMAN	gi|12231037|sp|Q92542.2|NICA_HUMAN	3	3	3	>gi|12231037|sp|Q92542.2|NICA_HUMAN RecName: Full=Nicastrin; Flags: Precursor	1	3	3	3	0	0	0	3	3	3	0	0	0	3	3	3	0	0	0	3	3	3	6.3	6.3	6.3	78.41	709	709	3			9		0	By matching	By matching	By matching	By MS/MS	By MS/MS	By MS/MS	0	0	0	6.3
gi|123374|sp|P26583.2|HMGB2_HUMAN;gi|205780950|sp|B2RPK0.1|HGB1A_HUMAN;gi|123369|sp|P09429.3|HMGB1_HUMAN	gi|123374|sp|P26583.2|HMGB2_HUMAN;gi|205780950|sp|B2RPK0.1|HGB1A_HUMAN;gi|123369|sp|P09429.3|HMGB1_HUMAN	1;1;1	1;1;1	1;1;1	>gi|123374|sp|P26583.2|HMGB2_HUMAN RecName: Full=High mobility group protein B2; AltName: Full=High mobility group protein 2; Short=HMG-2;>gi|205780950|sp|B2RPK0.1|HGB1A_HUMAN PUTATIVE PSEUDOGENE: RecName: Full=Putative high mobility group protein B1-like	3	1	1	1	0	0	0	1	1	0	0	0	0	1	1	0	0	0	0	1	1	0	5.7	5.7	5.7	24.033	209	209;211;215	1	2				1	By matching	By matching	By matching	By matching	By MS/MS	By matching	0	0	0	5.7
gi|123497|sp|P00492.2|HPRT_HUMAN	gi|123497|sp|P00492.2|HPRT_HUMAN	10	10	10	>gi|123497|sp|P00492.2|HPRT_HUMAN RecName: Full=Hypoxanthine-guanine phosphoribosyltransferase; Short=HGPRT; Short=HGPRTase	1	10	10	10	1	1	0	9	9	10	1	1	0	9	9	10	1	1	0	9	9	10	59.6	59.6	59.6	24.579	218	218	3.62	6			42	0	By matching	By matching	By matching	By MS/MS	By MS/MS	By MS/MS	5	4.6	0	59.6
gi|123508|sp|P00738.1|HPT_HUMAN;gi|262527547|sp|P00739.2|HPTR_HUMAN	gi|123508|sp|P00738.1|HPT_HUMAN	5;1	5;1	5;1	>gi|123508|sp|P00738.1|HPT_HUMAN RecName: Full=Haptoglobin; AltName: Full=Zonulin; Contains: RecName: Full=Haptoglobin alpha chain; Contains: RecName: Full=Haptoglobin beta chain; Flags: Precursor	2	5	5	5	1	1	5	3	3	4	1	1	5	3	3	4	1	1	5	3	3	4	15.8	15.8	15.8	45.205	406	406;348	1.17	16	1	1		0	By MS/MS	By matching	By MS/MS	By MS/MS	By MS/MS	By MS/MS	3	2.5	15.8	8.6
gi|123523|sp|P04196.1|HRG_HUMAN	gi|123523|sp|P04196.1|HRG_HUMAN	3	3	3	>gi|123523|sp|P04196.1|HRG_HUMAN RecName: Full=Histidine-rich glycoprotein; AltName: Full=Histidine-proline-rich glycoprotein; Short=HPRG; Flags: Precursor	1	3	3	3	0	0	3	0	0	0	0	0	3	0	0	0	0	0	3	0	0	0	8	8	8	59.578	525	525	1	3				0	By matching	By matching	By MS/MS	By matching	By matching	By matching	0	0	8	0
gi|123648|sp|P11142.1|HSP7C_HUMAN;gi|1708307|sp|P54652.1|HSP72_HUMAN	gi|123648|sp|P11142.1|HSP7C_HUMAN	27;8	26;7	23;4	>gi|123648|sp|P11142.1|HSP7C_HUMAN RecName: Full=Heat shock cognate 71 kDa protein; AltName: Full=Heat shock 70 kDa protein 8; AltName: Full=Lipopolysaccharide-associated protein 1; Short=LAP-1; Short=LPS-associated protein 1	2	27	26	23	11	13	13	26	27	26	10	12	13	25	26	25	9	11	11	22	23	22	47.5	47.5	43.5	70.897	646	646;639	2.32	15	184	92	9	0	By MS/MS	By MS/MS	By MS/MS	By MS/MS	By MS/MS	By MS/MS	23.2	23.7	27.4	41.8
gi|124007126|sp|Q8NBI3.2|DRAXI_HUMAN	gi|124007126|sp|Q8NBI3.2|DRAXI_HUMAN	1	1	1	>gi|124007126|sp|Q8NBI3.2|DRAXI_HUMAN RecName: Full=Draxin; AltName: Full=Dorsal inhibitory axon guidance protein; AltName: Full=Dorsal repulsive axon guidance protein; AltName: Full=Neucrin; Flags: Precursor	1	1	1	1	0	0	0	1	1	1	0	0	0	1	1	1	0	0	0	1	1	1	6	6	6	38.65	349	349	2		3			0.0076183	By matching	By matching	By matching	By MS/MS	By matching	By matching	0	0	0	6
gi|124007138|sp|Q9NTX5.2|ECHD1_HUMAN	gi|124007138|sp|Q9NTX5.2|ECHD1_HUMAN	1	1	1	>gi|124007138|sp|Q9NTX5.2|ECHD1_HUMAN RecName: Full=Ethylmalonyl-CoA decarboxylase; AltName: Full=Enoyl-CoA hydratase domain-containing protein 1; AltName: Full=Methylmalonyl-CoA decarboxylase; Short=MMCD	1	1	1	1	0	0	0	1	1	1	0	0	0	1	1	1	0	0	0	1	1	1	4.9	4.9	4.9	33.698	307	307	1	3				1	By matching	By matching	By matching	By matching	By MS/MS	By MS/MS	0	0	0	4.9
gi|124021002|sp|Q5T8P6.3|RBM26_HUMAN;gi|124021005|sp|Q9P2N5.2|RBM27_HUMAN	gi|124021002|sp|Q5T8P6.3|RBM26_HUMAN	5;1	5;1	5;1	>gi|124021002|sp|Q5T8P6.3|RBM26_HUMAN RecName: Full=RNA-binding protein 26; AltName: Full=CTCL tumor antigen se70-2; AltName: Full=RNA-binding motif protein 26	2	5	5	5	0	1	0	5	4	5	0	1	0	5	4	5	0	1	0	5	4	5	6.8	6.8	6.8	113.6	1007	1007;1060	2.81		4	17		0	By matching	By matching	By matching	By MS/MS	By MS/MS	By MS/MS	0	1.4	0	6.8
gi|124028615|sp|P28838.3|AMPL_HUMAN	gi|124028615|sp|P28838.3|AMPL_HUMAN	8	8	8	>gi|124028615|sp|P28838.3|AMPL_HUMAN RecName: Full=Cytosol aminopeptidase; AltName: Full=Leucine aminopeptidase 3; Short=LAP-3; AltName: Full=Leucyl aminopeptidase; AltName: Full=Peptidase S; AltName: Full=Proline aminopeptidase; AltName: Full=Prolyl amino	1	8	8	8	2	1	0	7	5	7	2	1	0	7	5	7	2	1	0	7	5	7	23.3	23.3	23.3	56.166	519	519	3.54		4	5	19	0	By matching	By matching	By matching	By MS/MS	By MS/MS	By MS/MS	5	2.7	0	21
gi|124106304|sp|P05166.3|PCCB_HUMAN	gi|124106304|sp|P05166.3|PCCB_HUMAN	3	3	3	>gi|124106304|sp|P05166.3|PCCB_HUMAN RecName: Full=Propionyl-CoA carboxylase beta chain, mitochondrial; Short=PCCase subunit beta; AltName: Full=Propanoyl-CoA:carbon dioxide ligase subunit beta; Flags: Precursor	1	3	3	3	0	0	0	2	1	3	0	0	0	2	1	3	0	0	0	2	1	3	8.7	8.7	8.7	58.215	539	539	2.56		6	1	2	0	By matching	By matching	By matching	By MS/MS	By MS/MS	By MS/MS	0	0	0	6.1
gi|124200|sp|P05198.3|IF2A_HUMAN	gi|124200|sp|P05198.3|IF2A_HUMAN	6	6	6	>gi|124200|sp|P05198.3|IF2A_HUMAN RecName: Full=Eukaryotic translation initiation factor 2 subunit 1; AltName: Full=Eukaryotic translation initiation factor 2 subunit alpha; Short=eIF-2-alpha; Short=eIF-2A; Short=eIF-2alpha	1	6	6	6	3	1	2	5	5	5	3	1	2	5	5	5	3	1	2	5	5	5	25.4	25.4	25.4	36.112	315	315	1.76	11	20	3		0	By MS/MS	By MS/MS	By MS/MS	By MS/MS	By MS/MS	By MS/MS	11.1	3.8	7	20.6
gi|124297|sp|P01583.1|IL1A_HUMAN	gi|124297|sp|P01583.1|IL1A_HUMAN	1	1	1	>gi|124297|sp|P01583.1|IL1A_HUMAN RecName: Full=Interleukin-1 alpha; Short=IL-1 alpha; AltName: Full=Hematopoietin-1; Flags: Precursor	1	1	1	1	0	0	0	1	1	1	0	0	0	1	1	1	0	0	0	1	1	1	4.4	4.4	4.4	30.606	271	271	3			3		1	By matching	By matching	By matching	By MS/MS	By matching	By matching	0	0	0	4.4
gi|124419|sp|P12268.2|IMDH2_HUMAN	gi|124419|sp|P12268.2|IMDH2_HUMAN	21	21	21	>gi|124419|sp|P12268.2|IMDH2_HUMAN RecName: Full=Inosine-5-monophosphate dehydrogenase 2; Short=IMP dehydrogenase 2; Short=IMPD 2; Short=IMPDH 2; AltName: Full=IMPDH-II	1	21	21	21	5	5	5	20	21	20	5	5	5	20	21	20	5	5	5	20	21	20	56.6	56.6	56.6	55.804	514	514	2.83	3	92	61	61	0	By MS/MS	By matching	By matching	By MS/MS	By MS/MS	By MS/MS	10.9	11.5	12.3	52.7
gi|125051|sp|P26440.1|IVD_HUMAN	gi|125051|sp|P26440.1|IVD_HUMAN	4	4	4	>gi|125051|sp|P26440.1|IVD_HUMAN RecName: Full=Isovaleryl-CoA dehydrogenase, mitochondrial; Short=IVD; Flags: Precursor	1	4	4	4	0	1	0	4	3	4	0	1	0	4	3	4	0	1	0	4	3	4	7.6	7.6	7.6	46.319	423	423	2	1	11	1		0	By matching	By matching	By matching	By MS/MS	By MS/MS	By MS/MS	0	2.4	0	7.6
gi|125126|sp|P08237.2|PFKAM_HUMAN	gi|125126|sp|P08237.2|PFKAM_HUMAN	12	10	10	>gi|125126|sp|P08237.2|PFKAM_HUMAN RecName: Full=ATP-dependent 6-phosphofructokinase, muscle type; Short=ATP-PFK; Short=PFK-M; AltName: Full=6-phosphofructokinase type A; AltName: Full=Phosphofructo-1-kinase isozyme A; Short=PFK-A; AltName: Full=Phosphohex	1	12	10	10	0	1	0	10	12	9	0	1	0	8	10	7	0	1	0	8	10	7	21.5	19.2	19.2	85.182	780	780	2.21		27	7		0	By matching	By matching	By matching	By MS/MS	By MS/MS	By MS/MS	0	1	0	15.9
gi|125145|sp|P01834.1|IGKC_HUMAN	gi|125145|sp|P01834.1|IGKC_HUMAN	8	8	8	>gi|125145|sp|P01834.1|IGKC_HUMAN RecName: Full=Ig kappa chain C region	1	8	8	8	0	0	8	0	1	1	0	0	8	0	1	1	0	0	8	0	1	1	85.8	85.8	85.8	11.609	106	106	1.12	15		1		0	By matching	By matching	By MS/MS	By matching	By matching	By MS/MS	0	0	85.8	0
gi|125193|sp|P10644.1|KAP0_HUMAN	gi|125193|sp|P10644.1|KAP0_HUMAN	1	1	1	>gi|125193|sp|P10644.1|KAP0_HUMAN RecName: Full=cAMP-dependent protein kinase type I-alpha regulatory subunit; AltName: Full=Tissue-specific extinguisher 1; Short=TSE1; Contains: RecName: Full=cAMP-dependent protein kinase type I-alpha regulatory subunit,	1	1	1	1	0	0	0	1	1	0	0	0	0	1	1	0	0	0	0	1	1	0	4.5	4.5	4.5	42.981	381	381	3		1		1	0	By matching	By matching	By matching	By MS/MS	By MS/MS	By matching	0	0	0	4.5
gi|125198|sp|P13861.2|KAP2_HUMAN;gi|206729918|sp|P31323.3|KAP3_HUMAN	gi|125198|sp|P13861.2|KAP2_HUMAN	13;2	13;2	13;2	>gi|125198|sp|P13861.2|KAP2_HUMAN RecName: Full=cAMP-dependent protein kinase type II-alpha regulatory subunit	2	13	13	13	0	0	0	13	13	13	0	0	0	13	13	13	0	0	0	13	13	13	46	46	46	45.518	404	404;418	3.83		3	2	42	0	By matching	By matching	By matching	By MS/MS	By MS/MS	By MS/MS	0	0	0	46
gi|125205|sp|P17612.2|KAPCA_HUMAN	gi|125205|sp|P17612.2|KAPCA_HUMAN	1	1	1	>gi|125205|sp|P17612.2|KAPCA_HUMAN RecName: Full=cAMP-dependent protein kinase catalytic subunit alpha; Short=PKA C-alpha	1	1	1	1	0	0	0	1	1	1	0	0	0	1	1	1	0	0	0	1	1	1	3.4	3.4	3.4	40.589	351	351	2.25		3	1		0	By matching	By matching	By matching	By MS/MS	By matching	By MS/MS	0	0	0	3.4
gi|125266|sp|P19784.1|CSK22_HUMAN	gi|125266|sp|P19784.1|CSK22_HUMAN	3	3	3	>gi|125266|sp|P19784.1|CSK22_HUMAN RecName: Full=Casein kinase II subunit alpha; Short=CK II alpha	1	3	3	3	0	0	0	3	2	3	0	0	0	3	2	3	0	0	0	3	2	3	10	10	10	41.213	350	350	2		8			0	By matching	By matching	By matching	By MS/MS	By MS/MS	By MS/MS	0	0	0	10
gi|125294|sp|P12277.1|KCRB_HUMAN	gi|125294|sp|P12277.1|KCRB_HUMAN	15	15	15	>gi|125294|sp|P12277.1|KCRB_HUMAN RecName: Full=Creatine kinase B-type; AltName: Full=B-CK; AltName: Full=Creatine kinase B chain	1	15	15	15	0	1	0	14	15	15	0	1	0	14	15	15	0	1	0	14	15	15	55.6	55.6	55.6	42.644	381	381	2.22	9	78	13	10	0	By matching	By matching	By matching	By MS/MS	By MS/MS	By MS/MS	0	2.9	0	47.2
gi|125315|sp|P12532.1|KCRU_HUMAN	gi|125315|sp|P12532.1|KCRU_HUMAN	5	5	5	>gi|125315|sp|P12532.1|KCRU_HUMAN RecName: Full=Creatine kinase U-type, mitochondrial; AltName: Full=Acidic-type mitochondrial creatine kinase; Short=Mia-CK; AltName: Full=Ubiquitous mitochondrial creatine kinase; Short=U-MtCK; Flags: Precursor	1	5	5	5	0	0	1	4	4	3	0	0	1	4	4	3	0	0	1	4	4	3	18.5	18.5	18.5	47.036	417	417	2	1	10	1		0	By matching	By matching	By matching	By MS/MS	By MS/MS	By MS/MS	0	0	5	12.2
gi|125711|sp|P12931.3|SRC_HUMAN	gi|125711|sp|P12931.3|SRC_HUMAN	1	1	1	>gi|125711|sp|P12931.3|SRC_HUMAN RecName: Full=Proto-oncogene tyrosine-protein kinase Src; AltName: Full=Proto-oncogene c-Src; AltName: Full=pp60c-src; Short=p60-Src	1	1	1	1	1	0	1	1	0	0	1	0	1	1	0	0	1	0	1	1	0	0	3	3	3	59.834	536	536	1.33	2	1			0.0091342	By matching	By matching	By matching	By MS/MS	By matching	By matching	3	0	3	3
gi|125729|sp|P12956.2|XRCC6_HUMAN	gi|125729|sp|P12956.2|XRCC6_HUMAN	18	18	18	>gi|125729|sp|P12956.2|XRCC6_HUMAN RecName: Full=X-ray repair cross-complementing protein 6; AltName: Full=5-deoxyribose-5-phosphate lyase Ku70; Short=5-dRP lyase Ku70; AltName: Full=70 kDa subunit of Ku antigen; AltName: Full=ATP-dependent DNA helicase	1	18	18	18	0	0	1	17	17	16	0	0	1	17	17	16	0	0	1	17	17	16	39.6	39.6	39.6	69.842	609	609	2.28	1	70	29		0	By matching	By matching	By matching	By MS/MS	By MS/MS	By MS/MS	0	0	2.3	37.6
gi|125731|sp|P13010.3|XRCC5_HUMAN	gi|125731|sp|P13010.3|XRCC5_HUMAN	20	20	20	>gi|125731|sp|P13010.3|XRCC5_HUMAN RecName: Full=X-ray repair cross-complementing protein 5; AltName: Full=86 kDa subunit of Ku antigen; AltName: Full=ATP-dependent DNA helicase 2 subunit 2; AltName: Full=ATP-dependent DNA helicase II 80 kDa subunit; AltNa	1	20	20	20	0	2	1	17	19	17	0	2	1	17	19	17	0	2	1	17	19	17	35.2	35.2	35.2	82.704	732	732	2.27	2	65	27		0	By matching	By matching	By matching	By MS/MS	By MS/MS	By MS/MS	0	2.6	1.9	26.5
gi|125777|sp|P01613.1|KV121_HUMAN	gi|125777|sp|P01613.1|KV121_HUMAN	1	1	1	>gi|125777|sp|P01613.1|KV121_HUMAN RecName: Full=Ig kappa chain V-I region Ni	1	1	1	1	0	0	1	0	0	0	0	0	1	0	0	0	0	0	1	0	0	0	14.3	14.3	14.3	11.745	112	112	1	1				0.0017182	By matching	By matching	By MS/MS	By matching	By matching	By matching	0	0	14.3	0
gi|125788|sp|P01617.1|KV204_HUMAN;gi|125782|sp|P01614.1|KV201_HUMAN;gi|125790|sp|P06309.1|KV205_HUMAN;gi|125792|sp|P06310.1|KV206_HUMAN	gi|125788|sp|P01617.1|KV204_HUMAN;gi|125782|sp|P01614.1|KV201_HUMAN;gi|125790|sp|P06309.1|KV205_HUMAN;gi|125792|sp|P06310.1|KV206_HUMAN	1;1;1;1	1;1;1;1	1;1;1;1	>gi|125788|sp|P01617.1|KV204_HUMAN RecName: Full=Ig kappa chain V-II region TEW;>gi|125782|sp|P01614.1|KV201_HUMAN RecName: Full=Ig kappa chain V-II region Cum;>gi|125790|sp|P06309.1|KV205_HUMAN RecName: Full=Ig kappa chain V-II region GM607; Flags: Precur	4	1	1	1	0	0	1	0	0	0	0	0	1	0	0	0	0	0	1	0	0	0	11.5	11.5	11.5	12.059	113	113;115;117;133	1	1				0	By matching	By matching	By MS/MS	By matching	By matching	By matching	0	0	11.5	0
gi|125799|sp|P01621.1|KV303_HUMAN	gi|125799|sp|P01621.1|KV303_HUMAN	1	1	1	>gi|125799|sp|P01621.1|KV303_HUMAN RecName: Full=Ig kappa chain V-III region NG9; Flags: Precursor	1	1	1	1	1	1	1	1	1	1	1	1	1	1	1	1	1	1	1	1	1	1	9	9	9	10.729	100	100	3.05	5	3		14	0	By MS/MS	By MS/MS	By MS/MS	By MS/MS	By MS/MS	By MS/MS	9	9	9	9
gi|125801|sp|P01622.1|KV304_HUMAN;gi|125807|sp|P04206.1|KV307_HUMAN;gi|125803|sp|P01623.1|KV305_HUMAN;gi|125797|sp|P01620.1|KV302_HUMAN;gi|322510042|sp|P18136.2|KV313_HUMAN;gi|125817|sp|P18135.1|KV312_HUMAN	gi|125801|sp|P01622.1|KV304_HUMAN;gi|125807|sp|P04206.1|KV307_HUMAN;gi|125803|sp|P01623.1|KV305_HUMAN;gi|125797|sp|P01620.1|KV302_HUMAN	3;2;2;2;1;1	3;2;2;2;1;1	3;2;2;2;1;1	>gi|125801|sp|P01622.1|KV304_HUMAN RecName: Full=Ig kappa chain V-III region Ti;>gi|125807|sp|P04206.1|KV307_HUMAN RecName: Full=Ig kappa chain V-III region GOL; AltName: Full=Rheumatoid factor;>gi|125803|sp|P01623.1|KV305_HUMAN RecName: Full=Ig kappa chai	6	3	3	3	1	1	3	2	2	2	1	1	3	2	2	2	1	1	3	2	2	2	39.4	39.4	39.4	11.788	109	109;109;109;109;129;129	2.87	8	1		14	0	By MS/MS	By MS/MS	By MS/MS	By MS/MS	By MS/MS	By MS/MS	8.3	8.3	39.4	22.9
gi|20455518|sp|P23258.2|TBG1_HUMAN;gi|12585375|sp|Q9NRH3.1|TBG2_HUMAN	gi|20455518|sp|P23258.2|TBG1_HUMAN;gi|12585375|sp|Q9NRH3.1|TBG2_HUMAN	1;1	1;1	1;1	>gi|20455518|sp|P23258.2|TBG1_HUMAN RecName: Full=Tubulin gamma-1 chain; AltName: Full=Gamma-1-tubulin; AltName: Full=Gamma-tubulin complex component 1; Short=GCP-1;>gi|12585375|sp|Q9NRH3.1|TBG2_HUMAN RecName: Full=Tubulin gamma-2 chain; AltName: Full=Gamm	2	1	1	1	0	0	0	1	1	1	0	0	0	1	1	1	0	0	0	1	1	1	2	2	2	51.169	451	451;451	2		3			0.0057401	By matching	By matching	By matching	By MS/MS	By MS/MS	By MS/MS	0	0	0	2
gi|12585536|sp|Q9Y3B4.1|SF3B6_HUMAN	gi|12585536|sp|Q9Y3B4.1|SF3B6_HUMAN	1	1	1	>gi|12585536|sp|Q9Y3B4.1|SF3B6_HUMAN RecName: Full=Splicing factor 3B subunit 6; AltName: Full=Pre-mRNA branch site protein p14; AltName: Full=SF3b 14 kDa subunit; Short=SF3B14a; AltName: Full=Spliceosome-associated protein, 14-kDa; AltName: Full=Splicing	1	1	1	1	0	0	0	1	1	1	0	0	0	1	1	1	0	0	0	1	1	1	11.2	11.2	11.2	14.585	125	125	1	3				0.00045147	By matching	By matching	By matching	By MS/MS	By matching	By matching	0	0	0	11.2
gi|125950361|sp|Q86U28.2|ISCA2_HUMAN	gi|125950361|sp|Q86U28.2|ISCA2_HUMAN	1	1	1	>gi|125950361|sp|Q86U28.2|ISCA2_HUMAN RecName: Full=Iron-sulfur cluster assembly 2 homolog, mitochondrial; AltName: Full=HESB-like domain-containing protein 1; Flags: Precursor	1	1	1	1	0	0	0	0	0	1	0	0	0	0	0	1	0	0	0	0	0	1	7.8	7.8	7.8	16.476	154	154	1	1				0	By matching	By matching	By matching	By matching	By matching	By MS/MS	0	0	0	0
gi|125957950|sp|Q3YEC7.2|RABL6_HUMAN	gi|125957950|sp|Q3YEC7.2|RABL6_HUMAN	3	3	3	>gi|125957950|sp|Q3YEC7.2|RABL6_HUMAN RecName: Full=Rab-like protein 6; AltName: Full=GTP-binding protein Parf; AltName: Full=Partner of ARF; AltName: Full=Rab-like protein 1; Short=RBEL1	1	3	3	3	0	0	0	2	3	2	0	0	0	2	3	2	0	0	0	2	3	2	6	6	6	79.548	729	729	3			7		0	By matching	By matching	By matching	By MS/MS	By MS/MS	By MS/MS	0	0	0	4.5
gi|125962|sp|P02545.1|LMNA_HUMAN	gi|125962|sp|P02545.1|LMNA_HUMAN	12	12	12	>gi|125962|sp|P02545.1|LMNA_HUMAN RecName: Full=Prelamin-A/C; Contains: RecName: Full=Lamin-A/C; AltName: Full=70 kDa lamin; AltName: Full=Renal carcinoma antigen NY-REN-32; Flags: Precursor	1	12	12	12	0	0	12	2	0	1	0	0	12	2	0	1	0	0	12	2	0	1	23.5	23.5	23.5	74.139	664	664	1.13	13	2			0	By matching	By matching	By MS/MS	By matching	By matching	By matching	0	0	23.5	3.2
gi|125969|sp|P08865.4|RSSA_HUMAN	gi|125969|sp|P08865.4|RSSA_HUMAN	14	14	14	>gi|125969|sp|P08865.4|RSSA_HUMAN RecName: Full=40S ribosomal protein SA; AltName: Full=37 kDa laminin receptor precursor; Short=37LRP; AltName: Full=37/67 kDa laminin receptor; Short=LRP/LR; AltName: Full=67 kDa laminin receptor; Short=67LR; AltName: Full	1	14	14	14	2	0	4	12	13	14	2	0	4	12	13	14	2	0	4	12	13	14	48.5	48.5	48.5	32.854	295	295	2.05	10	52	10	2	0	By MS/MS	By matching	By MS/MS	By MS/MS	By MS/MS	By MS/MS	7.1	0	19	48.1
gi|125985|sp|P05455.2|LA_HUMAN	gi|125985|sp|P05455.2|LA_HUMAN	11	11	11	>gi|125985|sp|P05455.2|LA_HUMAN RecName: Full=Lupus La protein; AltName: Full=La autoantigen; AltName: Full=La ribonucleoprotein; AltName: Full=Sjoegren syndrome type B antigen; Short=SS-B	1	11	11	11	2	2	4	11	11	11	2	2	4	11	11	11	2	2	4	11	11	11	31.6	31.6	31.6	46.836	408	408	3.43	1	16	8	50	0	By MS/MS	By MS/MS	By matching	By MS/MS	By MS/MS	By MS/MS	6.1	6.1	10.8	31.6
gi|125987702|sp|Q9BTE6.2|AASD1_HUMAN	gi|125987702|sp|Q9BTE6.2|AASD1_HUMAN	2	2	2	>gi|125987702|sp|Q9BTE6.2|AASD1_HUMAN RecName: Full=Alanyl-tRNA editing protein Aarsd1; AltName: Full=Alanyl-tRNA synthetase domain-containing protein 1	1	2	2	2	0	0	0	2	1	2	0	0	0	2	1	2	0	0	0	2	1	2	8.5	8.5	8.5	45.479	412	412	3.2		2		3	0	By matching	By matching	By matching	By matching	By MS/MS	By MS/MS	0	0	0	8.5
gi|125987708|sp|Q6NXT1.2|ANR54_HUMAN	gi|125987708|sp|Q6NXT1.2|ANR54_HUMAN	1	1	1	>gi|125987708|sp|Q6NXT1.2|ANR54_HUMAN RecName: Full=Ankyrin repeat domain-containing protein 54; AltName: Full=Lyn-interacting ankyrin repeat protein	1	1	1	1	0	0	0	1	1	1	0	0	0	1	1	1	0	0	0	1	1	1	4	4	4	32.505	300	300	1.4	3	2			0.0045511	By matching	By matching	By matching	By MS/MS	By MS/MS	By MS/MS	0	0	0	4
gi|125987811|sp|P12109.3|CO6A1_HUMAN	gi|125987811|sp|P12109.3|CO6A1_HUMAN	1	1	1	>gi|125987811|sp|P12109.3|CO6A1_HUMAN RecName: Full=Collagen alpha-1(VI) chain; Flags: Precursor	1	1	1	1	0	0	0	1	1	1	0	0	0	1	1	1	0	0	0	1	1	1	1.8	1.8	1.8	108.53	1028	1028	3			4		0	By matching	By matching	By matching	By MS/MS	By MS/MS	By MS/MS	0	0	0	1.8
gi|125987821|sp|O00429.2|DNM1L_HUMAN	gi|125987821|sp|O00429.2|DNM1L_HUMAN	5	5	5	>gi|125987821|sp|O00429.2|DNM1L_HUMAN RecName: Full=Dynamin-1-like protein; AltName: Full=Dnm1p/Vps1p-like protein; Short=DVLP; AltName: Full=Dynamin family member proline-rich carboxyl-terminal domain less; Short=Dymple; AltName: Full=Dynamin-like protein	1	5	5	5	0	0	0	5	4	3	0	0	0	5	4	3	0	0	0	5	4	3	10.1	10.1	10.1	81.876	736	736	2		13			0	By matching	By matching	By matching	By MS/MS	By MS/MS	By MS/MS	0	0	0	10.1
gi|125987826|sp|P15311.4|EZRI_HUMAN	gi|125987826|sp|P15311.4|EZRI_HUMAN	13	13	7	>gi|125987826|sp|P15311.4|EZRI_HUMAN RecName: Full=Ezrin; AltName: Full=Cytovillin; AltName: Full=Villin-2; AltName: Full=p81	1	13	13	7	1	0	1	12	12	9	1	0	1	12	12	9	0	0	0	7	7	4	23.7	23.7	13.7	69.412	586	586	2	2	43	2		0	By matching	By matching	By MS/MS	By MS/MS	By MS/MS	By MS/MS	3.2	0	1.5	22.4
gi|125987848|sp|P61758.3|PFD3_HUMAN	gi|125987848|sp|P61758.3|PFD3_HUMAN	5	5	5	>gi|125987848|sp|P61758.3|PFD3_HUMAN RecName: Full=Prefoldin subunit 3; AltName: Full=HIBBJ46; AltName: Full=Von Hippel-Lindau-binding protein 1; Short=VBP-1; Short=VHL-binding protein 1	1	5	5	5	0	0	0	3	4	4	0	0	0	3	4	4	0	0	0	3	4	4	26.9	26.9	26.9	22.658	197	197	4				11	0	By matching	By matching	By matching	By MS/MS	By MS/MS	By MS/MS	0	0	0	17.3
gi|126041|sp|P07195.2|LDHB_HUMAN;gi|76363520|sp|P07864.4|LDHC_HUMAN;gi|51316252|sp|Q6ZMR3.1|LDH6A_HUMAN	gi|126041|sp|P07195.2|LDHB_HUMAN	15;1;1	14;0;0	14;0;0	>gi|126041|sp|P07195.2|LDHB_HUMAN RecName: Full=L-lactate dehydrogenase B chain; Short=LDH-B; AltName: Full=LDH heart subunit; Short=LDH-H; AltName: Full=Renal carcinoma antigen NY-REN-46	3	15	14	14	8	7	8	14	15	14	7	6	7	13	14	13	7	6	7	13	14	13	53	49.4	49.4	36.638	334	334;332;332	2.04	66	88	37	19	0	By MS/MS	By MS/MS	By MS/MS	By MS/MS	By MS/MS	By MS/MS	24.6	24.6	24.6	47
gi|126047|sp|P00338.2|LDHA_HUMAN	gi|126047|sp|P00338.2|LDHA_HUMAN	15	15	14	>gi|126047|sp|P00338.2|LDHA_HUMAN RecName: Full=L-lactate dehydrogenase A chain; Short=LDH-A; AltName: Full=Cell proliferation-inducing gene 19 protein; AltName: Full=LDH muscle subunit; Short=LDH-M; AltName: Full=Renal carcinoma antigen NY-REN-59	1	15	15	14	5	4	3	12	14	12	5	4	3	12	14	12	4	3	2	11	13	11	50.3	50.3	46.7	36.688	332	332	2.04	43	61	22	13	0	By MS/MS	By MS/MS	By MS/MS	By MS/MS	By MS/MS	By MS/MS	16.9	13.6	9.3	38.3
gi|126302516|sp|Q9Y4W6.2|AFG32_HUMAN	gi|126302516|sp|Q9Y4W6.2|AFG32_HUMAN	4	4	4	>gi|126302516|sp|Q9Y4W6.2|AFG32_HUMAN RecName: Full=AFG3-like protein 2; AltName: Full=Paraplegin-like protein	1	4	4	4	0	0	0	4	4	4	0	0	0	4	4	4	0	0	0	4	4	4	6.3	6.3	6.3	88.583	797	797	2	1	12	1		0	By matching	By matching	By matching	By MS/MS	By MS/MS	By MS/MS	0	0	0	6.3
gi|126302556|sp|P20810.4|ICAL_HUMAN	gi|126302556|sp|P20810.4|ICAL_HUMAN	7	7	7	>gi|126302556|sp|P20810.4|ICAL_HUMAN RecName: Full=Calpastatin; AltName: Full=Calpain inhibitor; AltName: Full=Sperm BS-17 component	1	7	7	7	0	0	0	3	5	4	0	0	0	3	5	4	0	0	0	3	5	4	19.8	19.8	19.8	76.572	708	708	2.82		4	12	1	0	By matching	By matching	By matching	By MS/MS	By MS/MS	By MS/MS	0	0	0	8.3
gi|126302558|sp|Q8TEX9.2|IPO4_HUMAN	gi|126302558|sp|Q8TEX9.2|IPO4_HUMAN	17	17	17	>gi|126302558|sp|Q8TEX9.2|IPO4_HUMAN RecName: Full=Importin-4; Short=Imp4; AltName: Full=Importin-4b; Short=Imp4b; AltName: Full=Ran-binding protein 4; Short=RanBP4	1	17	17	17	0	0	0	15	16	15	0	0	0	15	16	15	0	0	0	15	16	15	23	23	23	118.71	1081	1081	3		1	53	1	0	By matching	By matching	By matching	By MS/MS	By MS/MS	By MS/MS	0	0	0	20.8
gi|126302585|sp|O15031.3|PLXB2_HUMAN	gi|126302585|sp|O15031.3|PLXB2_HUMAN	1	1	1	>gi|126302585|sp|O15031.3|PLXB2_HUMAN RecName: Full=Plexin-B2; AltName: Full=MM1; Flags: Precursor	1	1	1	1	0	0	0	1	1	1	0	0	0	1	1	1	0	0	0	1	1	1	0.9	0.9	0.9	205.12	1838	1838	3			3		1	By matching	By matching	By matching	By matching	By MS/MS	By matching	0	0	0	0.9
gi|126302611|sp|Q9H6E5.2|STPAP_HUMAN	gi|126302611|sp|Q9H6E5.2|STPAP_HUMAN	1	1	1	>gi|126302611|sp|Q9H6E5.2|STPAP_HUMAN RecName: Full=Speckle targeted PIP5K1A-regulated poly(A) polymerase; Short=Star-PAP; AltName: Full=RNA-binding motif protein 21; Short=RNA-binding protein 21; AltName: Full=U6 snRNA-specific terminal uridylyltransferas	1	1	1	1	0	0	0	1	1	1	0	0	0	1	1	1	0	0	0	1	1	1	1.4	1.4	1.4	93.846	874	874	3			3		0	By matching	By matching	By matching	By MS/MS	By MS/MS	By MS/MS	0	0	0	1.4
gi|126353|sp|P09960.2|LKHA4_HUMAN	gi|126353|sp|P09960.2|LKHA4_HUMAN	11	11	11	>gi|126353|sp|P09960.2|LKHA4_HUMAN RecName: Full=Leukotriene A-4 hydrolase; Short=LTA-4 hydrolase; AltName: Full=Leukotriene A(4) hydrolase	1	11	11	11	0	0	1	10	10	8	0	0	1	10	10	8	0	0	1	10	10	8	25.7	25.7	25.7	69.284	611	611	2.11		34	2	1	0	By matching	By matching	By matching	By MS/MS	By MS/MS	By MS/MS	0	0	2.6	22.9
gi|12643251|sp|Q9UIC8.2|LCMT1_HUMAN	gi|12643251|sp|Q9UIC8.2|LCMT1_HUMAN	4	4	4	>gi|12643251|sp|Q9UIC8.2|LCMT1_HUMAN RecName: Full=Leucine carboxyl methyltransferase 1; AltName: Full=Protein-leucine O-methyltransferase; AltName: Full=[Phosphatase 2A protein]-leucine-carboxy methyltransferase 1	1	4	4	4	0	0	0	2	4	3	0	0	0	2	4	3	0	0	0	2	4	3	10.2	10.2	10.2	38.379	334	334	2.22		8		1	0	By matching	By matching	By matching	By matching	By MS/MS	By MS/MS	0	0	0	5.7
gi|12643271|sp|P21281.3|VATB2_HUMAN;gi|215274116|sp|P15313.3|VATB1_HUMAN	gi|12643271|sp|P21281.3|VATB2_HUMAN;gi|215274116|sp|P15313.3|VATB1_HUMAN	2;1	2;1	2;1	>gi|12643271|sp|P21281.3|VATB2_HUMAN RecName: Full=V-type proton ATPase subunit B, brain isoform; Short=V-ATPase subunit B 2; AltName: Full=Endomembrane proton pump 58 kDa subunit; AltName: Full=HO57; AltName: Full=Vacuolar proton pump subunit B 2;>gi|2152	2	2	2	2	0	0	0	1	2	2	0	0	0	1	2	2	0	0	0	1	2	2	4.9	4.9	4.9	56.5	511	511;513	2		5			0	By matching	By matching	By matching	By matching	By MS/MS	By MS/MS	0	0	0	2
gi|12643300|sp|O94973.2|AP2A2_HUMAN;gi|262527580|sp|O95782.3|AP2A1_HUMAN	gi|12643300|sp|O94973.2|AP2A2_HUMAN	10;2	10;2	10;2	>gi|12643300|sp|O94973.2|AP2A2_HUMAN RecName: Full=AP-2 complex subunit alpha-2; AltName: Full=100 kDa coated vesicle protein C; AltName: Full=Adaptor protein complex AP-2 subunit alpha-2; AltName: Full=Adaptor-related protein complex 2 subunit alpha-2; Al	2	10	10	10	0	0	0	6	9	9	0	0	0	6	9	9	0	0	0	6	9	9	17.3	17.3	17.3	103.96	939	939;977	2.81		6	26		0	By matching	By matching	By matching	By MS/MS	By MS/MS	By MS/MS	0	0	0	9.2
gi|12643302|sp|O95394.1|AGM1_HUMAN	gi|12643302|sp|O95394.1|AGM1_HUMAN	2	2	2	>gi|12643302|sp|O95394.1|AGM1_HUMAN RecName: Full=Phosphoacetylglucosamine mutase; Short=PAGM; AltName: Full=Acetylglucosamine phosphomutase; AltName: Full=N-acetylglucosamine-phosphate mutase; AltName: Full=Phosphoglucomutase-3; Short=PGM 3	1	2	2	2	0	0	0	2	2	2	0	0	0	2	2	2	0	0	0	2	2	2	3.9	3.9	3.9	59.851	542	542	2		9			0	By matching	By matching	By matching	By MS/MS	By MS/MS	By matching	0	0	0	3.9
gi|12643306|sp|Q9UG63.2|ABCF2_HUMAN	gi|12643306|sp|Q9UG63.2|ABCF2_HUMAN	2	2	2	>gi|12643306|sp|Q9UG63.2|ABCF2_HUMAN RecName: Full=ATP-binding cassette sub-family F member 2; AltName: Full=Iron-inhibited ABC transporter 2	1	2	2	2	0	0	0	2	1	2	0	0	0	2	1	2	0	0	0	2	1	2	3.4	3.4	3.4	71.289	623	623	2		5			0.00045269	By matching	By matching	By matching	By MS/MS	By matching	By MS/MS	0	0	0	3.4
gi|166214967|sp|P49585.2|PCY1A_HUMAN;gi|12643330|sp|Q9Y5K3.1|PCY1B_HUMAN	gi|166214967|sp|P49585.2|PCY1A_HUMAN;gi|12643330|sp|Q9Y5K3.1|PCY1B_HUMAN	1;1	1;1	1;1	>gi|166214967|sp|P49585.2|PCY1A_HUMAN RecName: Full=Choline-phosphate cytidylyltransferase A; AltName: Full=CCT-alpha; AltName: Full=CTP:phosphocholine cytidylyltransferase A; Short=CCT A; Short=CT A; AltName: Full=Phosphorylcholine transferase A;>gi|12643	2	1	1	1	0	0	0	1	1	1	0	0	0	1	1	1	0	0	0	1	1	1	3.3	3.3	3.3	41.731	367	367;369	2.25		3	1		0.0017256	By matching	By matching	By matching	By matching	By MS/MS	By MS/MS	0	0	0	3.3
gi|12643334|sp|O94925.1|GLSK_HUMAN	gi|12643334|sp|O94925.1|GLSK_HUMAN	3	3	3	>gi|12643334|sp|O94925.1|GLSK_HUMAN RecName: Full=Glutaminase kidney isoform, mitochondrial; Short=GLS; AltName: Full=K-glutaminase; AltName: Full=L-glutamine amidohydrolase; Flags: Precursor	1	3	3	3	1	0	0	3	3	3	1	0	0	3	3	3	1	0	0	3	3	3	6.7	6.7	6.7	73.46	669	669	1.9	1	9			0	By matching	By matching	By matching	By MS/MS	By matching	By MS/MS	2.2	0	0	6.7
gi|12643338|sp|Q9Y2Q3.3|GSTK1_HUMAN	gi|12643338|sp|Q9Y2Q3.3|GSTK1_HUMAN	1	1	1	>gi|12643338|sp|Q9Y2Q3.3|GSTK1_HUMAN RecName: Full=Glutathione S-transferase kappa 1; AltName: Full=GST 13-13; AltName: Full=GST class-kappa; AltName: Full=GSTK1-1; Short=hGSTK1; AltName: Full=Glutathione S-transferase subunit 13	1	1	1	1	0	0	0	1	1	1	0	0	0	1	1	1	0	0	0	1	1	1	6.2	6.2	6.2	25.497	226	226	4				3	0.0057661	By matching	By matching	By matching	By MS/MS	By matching	By MS/MS	0	0	0	6.2
gi|12643387|sp|P98170.2|XIAP_HUMAN	gi|12643387|sp|P98170.2|XIAP_HUMAN	3	3	3	>gi|12643387|sp|P98170.2|XIAP_HUMAN RecName: Full=E3 ubiquitin-protein ligase XIAP; AltName: Full=Baculoviral IAP repeat-containing protein 4; AltName: Full=IAP-like protein; Short=ILP; Short=hILP; AltName: Full=Inhibitor of apoptosis protein 3; Short=IAP-	1	3	3	3	1	0	0	2	3	3	1	0	0	2	3	3	1	0	0	2	3	3	9.3	9.3	9.3	56.684	497	497	2		9			0	By matching	By matching	By matching	By MS/MS	By MS/MS	By MS/MS	2.8	0	0	6.4
gi|12643390|sp|O00299.4|CLIC1_HUMAN	gi|12643390|sp|O00299.4|CLIC1_HUMAN	7	7	7	>gi|12643390|sp|O00299.4|CLIC1_HUMAN RecName: Full=Chloride intracellular channel protein 1; AltName: Full=Chloride channel ABP; AltName: Full=Nuclear chloride ion channel 27; Short=NCC27; AltName: Full=Regulatory nuclear chloride ion channel protein; Shor	1	7	7	7	0	0	3	7	6	7	0	0	3	7	6	7	0	0	3	7	6	7	45.2	45.2	45.2	26.922	241	241	1.16	29	1	2		0	By matching	By matching	By MS/MS	By MS/MS	By MS/MS	By MS/MS	0	0	17.4	45.2
gi|12643395|sp|P31937.2|3HIDH_HUMAN	gi|12643395|sp|P31937.2|3HIDH_HUMAN	5	5	5	>gi|12643395|sp|P31937.2|3HIDH_HUMAN RecName: Full=3-hydroxyisobutyrate dehydrogenase, mitochondrial; Short=HIBADH; Flags: Precursor	1	5	5	5	0	0	0	5	4	4	0	0	0	5	4	4	0	0	0	5	4	4	20.2	20.2	20.2	35.329	336	336	1.13	13	2			0	By matching	By matching	By matching	By MS/MS	By MS/MS	By MS/MS	0	0	0	20.2
gi|12643396|sp|Q13618.2|CUL3_HUMAN	gi|12643396|sp|Q13618.2|CUL3_HUMAN	3	3	3	>gi|12643396|sp|Q13618.2|CUL3_HUMAN RecName: Full=Cullin-3; Short=CUL-3	1	3	3	3	0	0	0	2	3	2	0	0	0	2	3	2	0	0	0	2	3	2	7.2	7.2	7.2	88.929	768	768	2		7			0	By matching	By matching	By matching	By MS/MS	By MS/MS	By matching	0	0	0	5.5
gi|12643402|sp|Q92506.2|DHB8_HUMAN	gi|12643402|sp|Q92506.2|DHB8_HUMAN	3	3	3	>gi|12643402|sp|Q92506.2|DHB8_HUMAN RecName: Full=Estradiol 17-beta-dehydrogenase 8; AltName: Full=17-beta-hydroxysteroid dehydrogenase 8; Short=17-beta-HSD 8; AltName: Full=3-oxoacyl-[acyl-carrier-protein] reductase; AltName: Full=Protein Ke6; Short=Ke-6;	1	3	3	3	1	0	1	3	2	3	1	0	1	3	2	3	1	0	1	3	2	3	15.7	15.7	15.7	26.973	261	261	1	10				0	By matching	By matching	By matching	By MS/MS	By MS/MS	By MS/MS	4.6	0	4.6	15.7
gi|12643409|sp|P43243.2|MATR3_HUMAN	gi|12643409|sp|P43243.2|MATR3_HUMAN	11	11	11	>gi|12643409|sp|P43243.2|MATR3_HUMAN RecName: Full=Matrin-3	1	11	11	11	1	0	1	11	10	11	1	0	1	11	10	11	1	0	1	11	10	11	20.1	20.1	20.1	94.622	847	847	3			37		0	By matching	By matching	By matching	By MS/MS	By MS/MS	By MS/MS	1.2	0	1.4	20.1
gi|12643412|sp|Q01650.2|LAT1_HUMAN	gi|12643412|sp|Q01650.2|LAT1_HUMAN	2	2	2	>gi|12643412|sp|Q01650.2|LAT1_HUMAN RecName: Full=Large neutral amino acids transporter small subunit 1; AltName: Full=4F2 light chain; Short=4F2 LC; Short=4F2LC; AltName: Full=CD98 light chain; AltName: Full=Integral membrane protein E16; AltName: Full=L-	1	2	2	2	0	0	0	2	2	2	0	0	0	2	2	2	0	0	0	2	2	2	6.3	6.3	6.3	55.01	507	507	1.82	4	5	2		0	By matching	By matching	By matching	By MS/MS	By MS/MS	By MS/MS	0	0	0	6.3
gi|12643417|sp|O00330.3|ODPX_HUMAN	gi|12643417|sp|O00330.3|ODPX_HUMAN	1	1	1	>gi|12643417|sp|O00330.3|ODPX_HUMAN RecName: Full=Pyruvate dehydrogenase protein X component, mitochondrial; AltName: Full=Dihydrolipoamide dehydrogenase-binding protein of pyruvate dehydrogenase complex; AltName: Full=E3-binding protein; Short=E3BP; AltNa	1	1	1	1	0	0	0	0	1	1	0	0	0	0	1	1	0	0	0	0	1	1	3.4	3.4	3.4	54.122	501	501	4				2	0	By matching	By matching	By matching	By matching	By MS/MS	By MS/MS	0	0	0	0
gi|12643424|sp|Q02252.2|MMSA_HUMAN	gi|12643424|sp|Q02252.2|MMSA_HUMAN	2	2	2	>gi|12643424|sp|Q02252.2|MMSA_HUMAN RecName: Full=Methylmalonate-semialdehyde dehydrogenase [acylating], mitochondrial; Short=MMSDH; Short=Malonate-semialdehyde dehydrogenase [acylating]; AltName: Full=Aldehyde dehydrogenase family 6 member A1; Flags: Prec	1	2	2	2	0	0	0	2	2	2	0	0	0	2	2	2	0	0	0	2	2	2	5.8	5.8	5.8	57.839	535	535	4				6	0	By matching	By matching	By matching	By MS/MS	By matching	By MS/MS	0	0	0	5.8
gi|12643540|sp|O14818.1|PSA7_HUMAN;gi|108936006|sp|Q8TAA3.3|PSA7L_HUMAN	gi|12643540|sp|O14818.1|PSA7_HUMAN;gi|108936006|sp|Q8TAA3.3|PSA7L_HUMAN	6;3	6;3	6;3	>gi|12643540|sp|O14818.1|PSA7_HUMAN RecName: Full=Proteasome subunit alpha type-7; AltName: Full=Proteasome subunit RC6-1; AltName: Full=Proteasome subunit XAPC7;>gi|108936006|sp|Q8TAA3.3|PSA7L_HUMAN RecName: Full=Proteasome subunit alpha type-7-like	2	6	6	6	0	0	1	5	6	4	0	0	1	5	6	4	0	0	1	5	6	4	33.9	33.9	33.9	27.887	248	248;256	1.57	17			4	0	By matching	By matching	By matching	By MS/MS	By MS/MS	By MS/MS	0	0	4.4	28.2
gi|12643543|sp|O14981.2|BTAF1_HUMAN	gi|12643543|sp|O14981.2|BTAF1_HUMAN	2	2	2	>gi|12643543|sp|O14981.2|BTAF1_HUMAN RecName: Full=TATA-binding protein-associated factor 172; AltName: Full=ATP-dependent helicase BTAF1; AltName: Full=B-TFIID transcription factor-associated 170 kDa subunit; AltName: Full=TAF(II)170; AltName: Full=TBP-as	1	2	2	2	0	0	0	2	0	2	0	0	0	2	0	2	0	0	0	2	0	2	1.5	1.5	1.5	206.89	1849	1849	3			4		0	By matching	By matching	By matching	By MS/MS	By matching	By MS/MS	0	0	0	1.5
gi|12643636|sp|O75083.4|WDR1_HUMAN	gi|12643636|sp|O75083.4|WDR1_HUMAN	4	4	4	>gi|12643636|sp|O75083.4|WDR1_HUMAN RecName: Full=WD repeat-containing protein 1; AltName: Full=Actin-interacting protein 1; Short=AIP1; AltName: Full=NORI-1	1	4	4	4	0	0	2	3	3	4	0	0	2	3	3	4	0	0	2	3	3	4	9.6	9.6	9.6	66.193	606	606	2	2	12	2		0	By matching	By matching	By MS/MS	By MS/MS	By MS/MS	By MS/MS	0	0	4.1	6.9
gi|12643665|sp|O95817.3|BAG3_HUMAN	gi|12643665|sp|O95817.3|BAG3_HUMAN	4	4	4	>gi|12643665|sp|O95817.3|BAG3_HUMAN RecName: Full=BAG family molecular chaperone regulator 3; Short=BAG-3; AltName: Full=Bcl-2-associated athanogene 3; AltName: Full=Bcl-2-binding protein Bis; AltName: Full=Docking protein CAIR-1	1	4	4	4	0	0	0	2	2	3	0	0	0	2	2	3	0	0	0	2	2	3	8.7	8.7	8.7	61.594	575	575	2.4		6	4		0	By matching	By matching	By matching	By MS/MS	By MS/MS	By MS/MS	0	0	0	4
gi|12643716|sp|Q12923.2|PTN13_HUMAN	gi|12643716|sp|Q12923.2|PTN13_HUMAN	6	6	6	>gi|12643716|sp|Q12923.2|PTN13_HUMAN RecName: Full=Tyrosine-protein phosphatase non-receptor type 13; AltName: Full=Fas-associated protein-tyrosine phosphatase 1; Short=FAP-1; AltName: Full=PTP-BAS; AltName: Full=Protein-tyrosine phosphatase 1E; Short=PTP-	1	6	6	6	0	0	0	4	4	4	0	0	0	4	4	4	0	0	0	4	4	4	3	3	3	276.9	2485	2485	3			12		0	By matching	By matching	By matching	By MS/MS	By MS/MS	By MS/MS	0	0	0	2
gi|12643718|sp|Q13439.1|GOGA4_HUMAN	gi|12643718|sp|Q13439.1|GOGA4_HUMAN	3	3	3	>gi|12643718|sp|Q13439.1|GOGA4_HUMAN RecName: Full=Golgin subfamily A member 4; AltName: Full=256 kDa golgin; AltName: Full=Golgin-245; AltName: Full=Protein 72.1; AltName: Full=Trans-Golgi p230	1	3	3	3	1	0	1	2	2	3	1	0	1	2	2	3	1	0	1	2	2	3	1.7	1.7	1.7	261.14	2230	2230	3.56			4	5	0	By matching	By matching	By matching	By MS/MS	By matching	By MS/MS	0.4	0	0.4	0.9
gi|12643730|sp|Q16531.1|DDB1_HUMAN	gi|12643730|sp|Q16531.1|DDB1_HUMAN	26	26	26	>gi|12643730|sp|Q16531.1|DDB1_HUMAN RecName: Full=DNA damage-binding protein 1; AltName: Full=DDB p127 subunit; AltName: Full=DNA damage-binding protein a; Short=DDBa; AltName: Full=Damage-specific DNA-binding protein 1; AltName: Full=HBV X-associated prot	1	26	26	26	4	4	5	21	25	23	4	4	5	21	25	23	4	4	5	21	25	23	31.9	31.9	31.9	126.97	1140	1140	2.93	2	3	95		0	By MS/MS	By MS/MS	By matching	By MS/MS	By MS/MS	By MS/MS	5.6	6	5.2	25.4
gi|12643797|sp|Q99961.1|SH3G1_HUMAN;gi|10720276|sp|Q99962.1|SH3G2_HUMAN	gi|12643797|sp|Q99961.1|SH3G1_HUMAN	3;1	3;1	3;1	>gi|12643797|sp|Q99961.1|SH3G1_HUMAN RecName: Full=Endophilin-A2; AltName: Full=EEN fusion partner of MLL; AltName: Full=Endophilin-2; AltName: Full=Extra eleven-nineteen leukemia fusion gene protein; Short=EEN; AltName: Full=SH3 domain protein 2B; AltName	2	3	3	3	0	0	0	2	2	2	0	0	0	2	2	2	0	0	0	2	2	2	12.8	12.8	12.8	41.489	368	368;352	2		6			0	By matching	By matching	By matching	By MS/MS	By MS/MS	By MS/MS	0	0	0	9.5
gi|12643815|sp|Q9NQP4.1|PFD4_HUMAN	gi|12643815|sp|Q9NQP4.1|PFD4_HUMAN	1	1	1	>gi|12643815|sp|Q9NQP4.1|PFD4_HUMAN RecName: Full=Prefoldin subunit 4; AltName: Full=Protein C-1	1	1	1	1	0	0	0	0	1	1	0	0	0	0	1	1	0	0	0	0	1	1	11.2	11.2	11.2	15.314	134	134	1	2				0.0045948	By matching	By matching	By matching	By matching	By matching	By MS/MS	0	0	0	0
gi|12643821|sp|Q9NXH9.1|TRM1_HUMAN	gi|12643821|sp|Q9NXH9.1|TRM1_HUMAN	4	4	4	>gi|12643821|sp|Q9NXH9.1|TRM1_HUMAN RecName: Full=tRNA (guanine(26)-N(2))-dimethyltransferase; AltName: Full=tRNA 2,2-dimethylguanosine-26 methyltransferase; AltName: Full=tRNA(guanine-26,N(2)-N(2)) methyltransferase; AltName: Full=tRNA(m(2,2)G26)dimethylt	1	4	4	4	0	1	0	3	3	2	0	1	0	3	3	2	0	1	0	3	3	2	7.7	7.7	7.7	72.233	659	659	2		9			0	By matching	By matching	By matching	By MS/MS	By MS/MS	By MS/MS	0	1.7	0	5.9
gi|12643887|sp|Q9UHV9.1|PFD2_HUMAN	gi|12643887|sp|Q9UHV9.1|PFD2_HUMAN	2	2	2	>gi|12643887|sp|Q9UHV9.1|PFD2_HUMAN RecName: Full=Prefoldin subunit 2	1	2	2	2	0	0	0	2	2	2	0	0	0	2	2	2	0	0	0	2	2	2	16.9	16.9	16.9	16.648	154	154	1	7				0	By matching	By matching	By matching	By MS/MS	By MS/MS	By MS/MS	0	0	0	16.9
gi|12643895|sp|Q9UL15.1|BAG5_HUMAN	gi|12643895|sp|Q9UL15.1|BAG5_HUMAN	4	4	4	>gi|12643895|sp|Q9UL15.1|BAG5_HUMAN RecName: Full=BAG family molecular chaperone regulator 5; Short=BAG-5; AltName: Full=Bcl-2-associated athanogene 5	1	4	4	4	0	0	1	3	2	3	0	0	1	3	2	3	0	0	1	3	2	3	11.4	11.4	11.4	51.199	447	447	4				9	0	By matching	By matching	By matching	By MS/MS	By MS/MS	By MS/MS	0	0	2.7	8.7
gi|12643898|sp|Q9ULV4.1|COR1C_HUMAN	gi|12643898|sp|Q9ULV4.1|COR1C_HUMAN	5	5	5	>gi|12643898|sp|Q9ULV4.1|COR1C_HUMAN RecName: Full=Coronin-1C; AltName: Full=Coronin-3; AltName: Full=hCRNN4	1	5	5	5	1	0	2	5	5	5	1	0	2	5	5	5	1	0	2	5	5	5	14.6	14.6	14.6	53.248	474	474	3.8			4	16	0	By matching	By matching	By matching	By MS/MS	By MS/MS	By MS/MS	2.5	0	5.9	14.6
gi|12643945|sp|Q9Y277.1|VDAC3_HUMAN	gi|12643945|sp|Q9Y277.1|VDAC3_HUMAN	6	6	6	>gi|12643945|sp|Q9Y277.1|VDAC3_HUMAN RecName: Full=Voltage-dependent anion-selective channel protein 3; Short=VDAC-3; Short=hVDAC3; AltName: Full=Outer mitochondrial membrane protein porin 3	1	6	6	6	0	2	1	6	6	6	0	2	1	6	6	6	0	2	1	6	6	6	16.3	16.3	16.3	30.658	283	283	1.1	27	3			0	By matching	By matching	By matching	By MS/MS	By MS/MS	By MS/MS	0	7.8	3.9	16.3
gi|12643946|sp|Q9Y285.3|SYFA_HUMAN	gi|12643946|sp|Q9Y285.3|SYFA_HUMAN	4	4	4	>gi|12643946|sp|Q9Y285.3|SYFA_HUMAN RecName: Full=Phenylalanine--tRNA ligase alpha subunit; AltName: Full=CML33; AltName: Full=Phenylalanyl-tRNA synthetase alpha subunit; Short=PheRS	1	4	4	4	2	2	1	4	4	4	2	2	1	4	4	4	2	2	1	4	4	4	13.6	13.6	13.6	57.563	508	508	2.25		19	4	1	0	By MS/MS	By MS/MS	By MS/MS	By MS/MS	By MS/MS	By MS/MS	4.9	4.9	2.2	13.6
gi|12643947|sp|Q9Y2A7.1|NCKP1_HUMAN;gi|218512111|sp|P55160.3|NCKPL_HUMAN	gi|12643947|sp|Q9Y2A7.1|NCKP1_HUMAN	8;1	8;1	8;1	>gi|12643947|sp|Q9Y2A7.1|NCKP1_HUMAN RecName: Full=Nck-associated protein 1; Short=NAP 1; AltName: Full=Membrane-associated protein HEM-2; AltName: Full=p125Nap1	2	8	8	8	0	0	0	8	5	8	0	0	0	8	5	8	0	0	0	8	5	8	10.5	10.5	10.5	128.79	1128	1128;1127	2.95		1	21		0	By matching	By matching	By matching	By MS/MS	By MS/MS	By MS/MS	0	0	0	10.5
gi|12643951|sp|Q9Y3F4.1|STRAP_HUMAN	gi|12643951|sp|Q9Y3F4.1|STRAP_HUMAN	11	11	11	>gi|12643951|sp|Q9Y3F4.1|STRAP_HUMAN RecName: Full=Serine-threonine kinase receptor-associated protein; AltName: Full=MAP activator with WD repeats; AltName: Full=UNR-interacting protein; AltName: Full=WD-40 repeat protein PT-WD	1	11	11	11	0	0	1	11	10	10	0	0	1	11	10	10	0	0	1	11	10	10	43.7	43.7	43.7	38.438	350	350	2.15	3	41	11		0	By matching	By matching	By matching	By MS/MS	By MS/MS	By MS/MS	0	0	3.4	43.7
gi|12643956|sp|Q9Y5X1.1|SNX9_HUMAN	gi|12643956|sp|Q9Y5X1.1|SNX9_HUMAN	4	4	4	>gi|12643956|sp|Q9Y5X1.1|SNX9_HUMAN RecName: Full=Sorting nexin-9; AltName: Full=SH3 and PX domain-containing protein 1; Short=Protein SDP1; AltName: Full=SH3 and PX domain-containing protein 3A	1	4	4	4	1	0	0	4	4	4	1	0	0	4	4	4	1	0	0	4	4	4	11.8	11.8	11.8	66.591	595	595	2.06		15	1		0	By matching	By matching	By matching	By MS/MS	By MS/MS	By MS/MS	3	0	0	11.8
gi|12643993|sp|O75534.2|CSDE1_HUMAN	gi|12643993|sp|O75534.2|CSDE1_HUMAN	11	11	11	>gi|12643993|sp|O75534.2|CSDE1_HUMAN RecName: Full=Cold shock domain-containing protein E1; AltName: Full=N-ras upstream gene protein; AltName: Full=Protein UNR	1	11	11	11	1	0	0	10	10	10	1	0	0	10	10	10	1	0	0	10	10	10	17	17	17	88.884	798	798	2.22	4	40	15	1	0	By matching	By matching	By matching	By MS/MS	By MS/MS	By MS/MS	1.4	0	0	17
gi|12644008|sp|P30085.3|KCY_HUMAN	gi|12644008|sp|P30085.3|KCY_HUMAN	2	2	2	>gi|12644008|sp|P30085.3|KCY_HUMAN RecName: Full=UMP-CMP kinase; AltName: Full=Deoxycytidylate kinase; Short=CK; Short=dCMP kinase; AltName: Full=Nucleoside-diphosphate kinase; AltName: Full=Uridine monophosphate/cytidine monophosphate kinase; Short=UMP/CM	1	2	2	2	0	0	0	2	2	1	0	0	0	2	2	1	0	0	0	2	2	1	14.8	14.8	14.8	22.222	196	196	1	7				0	By matching	By matching	By matching	By MS/MS	By MS/MS	By MS/MS	0	0	0	14.8
gi|12644065|sp|O43306.2|ADCY6_HUMAN	gi|12644065|sp|O43306.2|ADCY6_HUMAN	1	1	1	>gi|12644065|sp|O43306.2|ADCY6_HUMAN RecName: Full=Adenylate cyclase type 6; AltName: Full=ATP pyrophosphate-lyase 6; AltName: Full=Adenylate cyclase type VI; AltName: Full=Adenylyl cyclase 6; AltName: Full=Ca(2+)-inhibitable adenylyl cyclase	1	1	1	1	0	0	0	0	0	1	0	0	0	0	0	1	0	0	0	0	0	1	1.3	1.3	1.3	130.61	1168	1168	1	1				1	By matching	By matching	By matching	By matching	By matching	By MS/MS	0	0	0	0
gi|12644118|sp|P11387.2|TOP1_HUMAN;gi|20140694|sp|Q969P6.1|TOP1M_HUMAN	gi|12644118|sp|P11387.2|TOP1_HUMAN	3;1	3;1	3;1	>gi|12644118|sp|P11387.2|TOP1_HUMAN RecName: Full=DNA topoisomerase 1; AltName: Full=DNA topoisomerase I	2	3	3	3	0	0	0	2	1	3	0	0	0	2	1	3	0	0	0	2	1	3	4.1	4.1	4.1	90.725	765	765;601	2.75		2	6		0	By matching	By matching	By matching	By MS/MS	By MS/MS	By MS/MS	0	0	0	2.7
gi|12644140|sp|P17568.4|NDUB7_HUMAN	gi|12644140|sp|P17568.4|NDUB7_HUMAN	2	2	2	>gi|12644140|sp|P17568.4|NDUB7_HUMAN RecName: Full=NADH dehydrogenase [ubiquinone] 1 beta subcomplex subunit 7; AltName: Full=Cell adhesion protein SQM1; AltName: Full=Complex I-B18; Short=CI-B18; AltName: Full=NADH-ubiquinone oxidoreductase B18 subunit	1	2	2	2	0	0	1	2	2	2	0	0	1	2	2	2	0	0	1	2	2	2	12.4	12.4	12.4	16.402	137	137	1	7				0	By matching	By matching	By matching	By MS/MS	By MS/MS	By MS/MS	0	0	10.9	12.4
gi|12644154|sp|P20042.2|IF2B_HUMAN	gi|12644154|sp|P20042.2|IF2B_HUMAN	5	5	5	>gi|12644154|sp|P20042.2|IF2B_HUMAN RecName: Full=Eukaryotic translation initiation factor 2 subunit 2; AltName: Full=Eukaryotic translation initiation factor 2 subunit beta; Short=eIF-2-beta	1	5	5	5	0	0	0	3	4	4	0	0	0	3	4	4	0	0	0	3	4	4	20.4	20.4	20.4	38.388	333	333	3.4		3	3	9	0	By matching	By matching	By matching	By MS/MS	By MS/MS	By MS/MS	0	0	0	11.4
gi|12644177|sp|P26640.4|SYVC_HUMAN	gi|12644177|sp|P26640.4|SYVC_HUMAN	15	15	15	>gi|12644177|sp|P26640.4|SYVC_HUMAN RecName: Full=Valine--tRNA ligase; AltName: Full=Protein G7a; AltName: Full=Valyl-tRNA synthetase; Short=ValRS	1	15	15	15	1	0	0	12	15	15	1	0	0	12	15	15	1	0	0	12	15	15	17	17	17	140.47	1264	1264	2.98		1	51		0	By matching	By matching	By matching	By MS/MS	By MS/MS	By MS/MS	1.2	0	0	14
gi|12644231|sp|P35611.2|ADDA_HUMAN	gi|12644231|sp|P35611.2|ADDA_HUMAN	2	2	2	>gi|12644231|sp|P35611.2|ADDA_HUMAN RecName: Full=Alpha-adducin; AltName: Full=Erythrocyte adducin subunit alpha	1	2	2	2	0	0	0	1	2	2	0	0	0	1	2	2	0	0	0	1	2	2	4.1	4.1	4.1	80.954	737	737	2.57		3	4		0	By matching	By matching	By matching	By matching	By MS/MS	By MS/MS	0	0	0	1.6
gi|12644239|sp|P36776.2|LONM_HUMAN	gi|12644239|sp|P36776.2|LONM_HUMAN	18	18	18	>gi|12644239|sp|P36776.2|LONM_HUMAN RecName: Full=Lon protease homolog, mitochondrial; AltName: Full=LONHs; AltName: Full=Lon protease-like protein; Short=LONP; AltName: Full=Mitochondrial ATP-dependent protease Lon; AltName: Full=Serine protease 15; Flags	1	18	18	18	0	1	1	17	16	16	0	1	1	17	16	16	0	1	1	17	16	16	29.5	29.5	29.5	106.49	959	959	2.86	3	3	58		0	By matching	By matching	By matching	By MS/MS	By MS/MS	By MS/MS	0	1.3	1.5	28.3
gi|12644268|sp|P43897.2|EFTS_HUMAN	gi|12644268|sp|P43897.2|EFTS_HUMAN	4	4	4	>gi|12644268|sp|P43897.2|EFTS_HUMAN RecName: Full=Elongation factor Ts, mitochondrial; Short=EF-Ts; Short=EF-TsMt; Flags: Precursor	1	4	4	4	0	0	0	4	3	3	0	0	0	4	3	3	0	0	0	4	3	3	21.5	21.5	21.5	35.39	325	325	1	10				0	By matching	By matching	By matching	By MS/MS	By MS/MS	By MS/MS	0	0	0	21.5
gi|12644285|sp|P48553.2|TPC10_HUMAN	gi|12644285|sp|P48553.2|TPC10_HUMAN	1	1	1	>gi|12644285|sp|P48553.2|TPC10_HUMAN RecName: Full=Trafficking protein particle complex subunit 10; AltName: Full=Epilepsy holoprosencephaly candidate 1 protein; Short=EHOC-1; AltName: Full=Protein GT334; AltName: Full=Trafficking protein particle complex	1	1	1	1	0	0	0	0	0	1	0	0	0	0	0	1	0	0	0	0	0	1	1.2	1.2	1.2	142.19	1259	1259	3			1		0.00044484	By matching	By matching	By matching	By matching	By matching	By MS/MS	0	0	0	0
gi|12644292|sp|P49840.2|GSK3A_HUMAN	gi|12644292|sp|P49840.2|GSK3A_HUMAN	2	2	2	>gi|12644292|sp|P49840.2|GSK3A_HUMAN RecName: Full=Glycogen synthase kinase-3 alpha; Short=GSK-3 alpha; AltName: Full=Serine/threonine-protein kinase GSK3A	1	2	2	2	0	0	0	2	2	2	0	0	0	2	2	2	0	0	0	2	2	2	5	5	5	50.98	483	483	3.86			1	6	0	By matching	By matching	By matching	By MS/MS	By matching	By MS/MS	0	0	0	5
gi|12644375|sp|Q01433.2|AMPD2_HUMAN	gi|12644375|sp|Q01433.2|AMPD2_HUMAN	7	7	7	>gi|12644375|sp|Q01433.2|AMPD2_HUMAN RecName: Full=AMP deaminase 2; AltName: Full=AMP deaminase isoform L	1	7	7	7	0	0	0	6	7	6	0	0	0	6	7	6	0	0	0	6	7	6	10.5	10.5	10.5	100.69	879	879	2.21		23	6		0	By matching	By matching	By matching	By MS/MS	By MS/MS	By MS/MS	0	0	0	9
gi|12644405|sp|Q13155.2|AIMP2_HUMAN	gi|12644405|sp|Q13155.2|AIMP2_HUMAN	5	5	5	>gi|12644405|sp|Q13155.2|AIMP2_HUMAN RecName: Full=Aminoacyl tRNA synthase complex-interacting multifunctional protein 2; AltName: Full=Multisynthase complex auxiliary component p38; AltName: Full=Protein JTV-1	1	5	5	5	1	0	1	4	5	4	1	0	1	4	5	4	1	0	1	4	5	4	23.8	23.8	23.8	35.348	320	320	2	3	13	3		0	By matching	By matching	By matching	By MS/MS	By MS/MS	By MS/MS	4.1	0	4.1	19.7
gi|126539|sp|P01700.1|LV102_HUMAN;gi|126547|sp|P04208.1|LV106_HUMAN;gi|126562|sp|P01712.1|LV209_HUMAN;gi|126559|sp|P01709.1|LV206_HUMAN	gi|126539|sp|P01700.1|LV102_HUMAN;gi|126547|sp|P04208.1|LV106_HUMAN;gi|126562|sp|P01712.1|LV209_HUMAN;gi|126559|sp|P01709.1|LV206_HUMAN	2;1;1;1	2;1;1;1	2;1;1;1	>gi|126539|sp|P01700.1|LV102_HUMAN RecName: Full=Ig lambda chain V-I region HA;>gi|126547|sp|P04208.1|LV106_HUMAN RecName: Full=Ig lambda chain V-I region WAH;>gi|126562|sp|P01712.1|LV209_HUMAN RecName: Full=Ig lambda chain V-II region WIN;>gi|126559|sp|P0	4	2	2	2	1	1	2	1	1	1	1	1	2	1	1	1	1	1	2	1	1	1	23.2	23.2	23.2	11.896	112	112;109;111;111	2.15	8			5	0	By MS/MS	By MS/MS	By MS/MS	By MS/MS	By MS/MS	By MS/MS	11.6	11.6	23.2	11.6
gi|126568|sp|P01717.1|LV403_HUMAN	gi|126568|sp|P01717.1|LV403_HUMAN	1	1	1	>gi|126568|sp|P01717.1|LV403_HUMAN RecName: Full=Ig lambda chain V-IV region Hil	1	1	1	1	0	0	1	0	0	0	0	0	1	0	0	0	0	0	1	0	0	0	17.8	17.8	17.8	11.517	107	107	1	1				0	By matching	By matching	By MS/MS	By matching	By matching	By matching	0	0	17.8	0
gi|126733|sp|P23368.1|MAOM_HUMAN	gi|126733|sp|P23368.1|MAOM_HUMAN	4	4	4	>gi|126733|sp|P23368.1|MAOM_HUMAN RecName: Full=NAD-dependent malic enzyme, mitochondrial; Short=NAD-ME; AltName: Full=Malic enzyme 2; Flags: Precursor	1	4	4	4	0	0	0	3	4	2	0	0	0	3	4	2	0	0	0	3	4	2	9.6	9.6	9.6	65.443	584	584	1.9	1	9			0	By matching	By matching	By matching	By MS/MS	By MS/MS	By MS/MS	0	0	0	6.8
gi|127234|sp|P26038.3|MOES_HUMAN	gi|127234|sp|P26038.3|MOES_HUMAN	11	5	5	>gi|127234|sp|P26038.3|MOES_HUMAN RecName: Full=Moesin; AltName: Full=Membrane-organizing extension spike protein	1	11	5	5	1	0	1	8	8	7	0	0	0	3	3	2	0	0	0	3	3	2	26	15.8	15.8	67.819	577	577	1.89	1	8			0	By matching	By matching	By matching	By MS/MS	By MS/MS	By MS/MS	3.3	0	1.6	19.2
gi|127717|sp|P29218.1|IMPA1_HUMAN	gi|127717|sp|P29218.1|IMPA1_HUMAN	3	3	3	>gi|127717|sp|P29218.1|IMPA1_HUMAN RecName: Full=Inositol monophosphatase 1; Short=IMP 1; Short=IMPase 1; AltName: Full=D-galactose 1-phosphate phosphatase; AltName: Full=Inositol-1(or 4)-monophosphatase 1; AltName: Full=Lithium-sensitive myo-inositol mono	1	3	3	3	0	0	0	3	3	3	0	0	0	3	3	3	0	0	0	3	3	3	13.7	13.7	13.7	30.188	277	277	1	9				0	By matching	By matching	By matching	By MS/MS	By MS/MS	By MS/MS	0	0	0	13.7
gi|127846|sp|P00387.3|NB5R3_HUMAN	gi|127846|sp|P00387.3|NB5R3_HUMAN	8	8	8	>gi|127846|sp|P00387.3|NB5R3_HUMAN RecName: Full=NADH-cytochrome b5 reductase 3; Short=B5R; Short=Cytochrome b5 reductase; AltName: Full=Diaphorase-1; Contains: RecName: Full=NADH-cytochrome b5 reductase 3 membrane-bound form; Contains: RecName: Full=NADH-	1	8	8	8	0	0	1	8	8	8	0	0	1	8	8	8	0	0	1	8	8	8	32.2	32.2	32.2	34.234	301	301	1.25	33	4	3		0	By matching	By matching	By matching	By MS/MS	By MS/MS	By MS/MS	0	0	3.7	32.2
gi|127981|sp|P15531.1|NDKA_HUMAN	gi|127981|sp|P15531.1|NDKA_HUMAN	7	7	2	>gi|127981|sp|P15531.1|NDKA_HUMAN RecName: Full=Nucleoside diphosphate kinase A; Short=NDK A; Short=NDP kinase A; AltName: Full=Granzyme A-activated DNase; Short=GAAD; AltName: Full=Metastasis inhibition factor nm23; AltName: Full=NM23-H1; AltName: Full=Tu	1	7	7	2	1	0	1	7	7	6	1	0	1	7	7	6	0	0	0	2	2	2	46.7	46.7	15.8	17.149	152	152	1.08	34	1	1		0	By matching	By matching	By matching	By MS/MS	By MS/MS	By MS/MS	11.2	0	11.2	46.7
gi|127983|sp|P22392.1|NDKB_HUMAN;gi|3914116|sp|O60361.1|NDK8_HUMAN	gi|127983|sp|P22392.1|NDKB_HUMAN;gi|3914116|sp|O60361.1|NDK8_HUMAN	6;3	1;1	1;1	>gi|127983|sp|P22392.1|NDKB_HUMAN RecName: Full=Nucleoside diphosphate kinase B; Short=NDK B; Short=NDP kinase B; AltName: Full=C-myc purine-binding transcription factor PUF; AltName: Full=Histidine protein kinase NDKB; AltName: Full=nm23-H2;>gi|3914116|sp	2	6	1	1	1	0	1	6	6	5	0	0	0	1	1	1	0	0	0	1	1	1	37.5	6.6	6.6	17.298	152	152;137	1	3				1	By matching	By matching	By matching	By matching	By matching	By MS/MS	11.2	0	11.2	37.5
gi|129018|sp|P04181.1|OAT_HUMAN	gi|129018|sp|P04181.1|OAT_HUMAN	11	11	11	>gi|129018|sp|P04181.1|OAT_HUMAN RecName: Full=Ornithine aminotransferase, mitochondrial; AltName: Full=Ornithine delta-aminotransferase; AltName: Full=Ornithine--oxo-acid aminotransferase; Contains: RecName: Full=Ornithine aminotransferase, hepatic form;	1	11	11	11	6	6	6	8	10	8	6	6	6	8	10	8	6	6	6	8	10	8	33.3	33.3	33.3	48.534	439	439	1.88	6	46			0	By MS/MS	By MS/MS	By MS/MS	By MS/MS	By MS/MS	By MS/MS	11.4	15.7	15.7	22.3
gi|129063|sp|P08559.3|ODPA_HUMAN;gi|266687|sp|P29803.1|ODPAT_HUMAN	gi|129063|sp|P08559.3|ODPA_HUMAN	5;2	5;2	5;2	>gi|129063|sp|P08559.3|ODPA_HUMAN RecName: Full=Pyruvate dehydrogenase E1 component subunit alpha, somatic form, mitochondrial; AltName: Full=PDHE1-A type I; Flags: Precursor	2	5	5	5	1	1	1	5	5	4	1	1	1	5	5	4	1	1	1	5	5	4	16.7	16.7	16.7	43.295	390	390;388	2.12	1	22	2	1	0	By matching	By matching	By matching	By MS/MS	By MS/MS	By MS/MS	2.3	2.3	2.3	16.7
gi|129308|sp|P22059.1|OSBP1_HUMAN	gi|129308|sp|P22059.1|OSBP1_HUMAN	6	6	6	>gi|129308|sp|P22059.1|OSBP1_HUMAN RecName: Full=Oxysterol-binding protein 1	1	6	6	6	0	0	0	6	5	6	0	0	0	6	5	6	0	0	0	6	5	6	12.5	12.5	12.5	89.42	807	807	1.95	1	18			0	By matching	By matching	By matching	By MS/MS	By MS/MS	By MS/MS	0	0	0	12.5
gi|129379|sp|P10809.2|CH60_HUMAN	gi|129379|sp|P10809.2|CH60_HUMAN	28	28	28	>gi|129379|sp|P10809.2|CH60_HUMAN RecName: Full=60 kDa heat shock protein, mitochondrial; AltName: Full=60 kDa chaperonin; AltName: Full=Chaperonin 60; Short=CPN60; AltName: Full=Heat shock protein 60; Short=HSP-60; Short=Hsp60; AltName: Full=HuCHA60; AltN	1	28	28	28	0	1	5	24	28	26	0	1	5	24	28	26	0	1	5	24	28	26	55.5	55.5	55.5	61.054	573	573	2.19	10	131	39	3	0	By matching	By matching	By MS/MS	By MS/MS	By MS/MS	By MS/MS	0	2.6	13.6	55.3
gi|129383|sp|P17844.1|DDX5_HUMAN	gi|129383|sp|P17844.1|DDX5_HUMAN	7	3	3	>gi|129383|sp|P17844.1|DDX5_HUMAN RecName: Full=Probable ATP-dependent RNA helicase DDX5; AltName: Full=DEAD box protein 5; AltName: Full=RNA helicase p68	1	7	3	3	1	2	0	6	7	5	0	0	0	3	3	2	0	0	0	3	3	2	13.4	5.7	5.7	69.147	614	614	2.27		8	3		0	By matching	By matching	By matching	By MS/MS	By MS/MS	By MS/MS	2	4.1	0	11.6
gi|129694|sp|P12004.1|PCNA_HUMAN	gi|129694|sp|P12004.1|PCNA_HUMAN	13	13	13	>gi|129694|sp|P12004.1|PCNA_HUMAN RecName: Full=Proliferating cell nuclear antigen; Short=PCNA; AltName: Full=Cyclin	1	13	13	13	2	1	1	13	11	12	2	1	1	13	11	12	2	1	1	13	11	12	54	54	54	28.768	261	261	1.39	50	13	7		0	By MS/MS	By matching	By matching	By MS/MS	By MS/MS	By MS/MS	12.3	5	5	54
gi|130225|sp|P19174.1|PLCG1_HUMAN	gi|130225|sp|P19174.1|PLCG1_HUMAN	15	15	15	>gi|130225|sp|P19174.1|PLCG1_HUMAN RecName: Full=1-phosphatidylinositol 4,5-bisphosphate phosphodiesterase gamma-1; AltName: Full=PLC-148; AltName: Full=Phosphoinositide phospholipase C-gamma-1; AltName: Full=Phospholipase C-II; Short=PLC-II; AltName: Full	1	15	15	15	0	0	1	10	15	14	0	0	1	10	15	14	0	0	1	10	15	14	15.2	15.2	15.2	148.53	1290	1290	3			42		0	By matching	By matching	By matching	By MS/MS	By MS/MS	By MS/MS	0	0	0.9	9.1
gi|130316|sp|P00747.2|PLMN_HUMAN	gi|130316|sp|P00747.2|PLMN_HUMAN	14	14	14	>gi|130316|sp|P00747.2|PLMN_HUMAN RecName: Full=Plasminogen; Contains: RecName: Full=Plasmin heavy chain A; Contains: RecName: Full=Activation peptide; Contains: RecName: Full=Angiostatin; Contains: RecName: Full=Plasmin heavy chain A, short form; Contains	1	14	14	14	0	0	14	1	1	1	0	0	14	1	1	1	0	0	14	1	1	1	21	21	21	90.568	810	810	1.15	18	1	1		0	By matching	By matching	By MS/MS	By matching	By matching	By matching	0	0	21	1.7
gi|130348|sp|P18669.2|PGAM1_HUMAN;gi|130353|sp|P15259.3|PGAM2_HUMAN;gi|26006838|sp|Q8N0Y7.1|PGAM4_HUMAN	gi|130348|sp|P18669.2|PGAM1_HUMAN;gi|130353|sp|P15259.3|PGAM2_HUMAN	4;2;1	4;2;1	4;2;1	>gi|130348|sp|P18669.2|PGAM1_HUMAN RecName: Full=Phosphoglycerate mutase 1; AltName: Full=BPG-dependent PGAM 1; AltName: Full=Phosphoglycerate mutase isozyme B; Short=PGAM-B;>gi|130353|sp|P15259.3|PGAM2_HUMAN RecName: Full=Phosphoglycerate mutase 2; AltNam	3	4	4	4	1	0	0	4	4	3	1	0	0	4	4	3	1	0	0	4	4	3	25.2	25.2	25.2	28.804	254	254;253;254	1	16				0	By matching	By matching	By matching	By MS/MS	By MS/MS	By MS/MS	5.5	0	0	25.2
gi|130358|sp|P28288.1|ABCD3_HUMAN	gi|130358|sp|P28288.1|ABCD3_HUMAN	1	1	1	>gi|130358|sp|P28288.1|ABCD3_HUMAN RecName: Full=ATP-binding cassette sub-family D member 3; AltName: Full=70 kDa peroxisomal membrane protein; Short=PMP70	1	1	1	1	0	0	0	1	1	1	0	0	0	1	1	1	0	0	0	1	1	1	2	2	2	75.475	659	659	2		3			1	By matching	By matching	By matching	By matching	By MS/MS	By matching	0	0	0	2
gi|130683|sp|P21796.2|VDAC1_HUMAN	gi|130683|sp|P21796.2|VDAC1_HUMAN	10	10	10	>gi|130683|sp|P21796.2|VDAC1_HUMAN RecName: Full=Voltage-dependent anion-selective channel protein 1; Short=VDAC-1; Short=hVDAC1; AltName: Full=Outer mitochondrial membrane protein porin 1; AltName: Full=Plasmalemmal porin; AltName: Full=Porin 31HL; AltNam	1	10	10	10	0	0	4	10	10	9	0	0	4	10	10	9	0	0	4	10	10	9	32.2	32.2	32.2	30.772	283	283	1.04	44	2			0	By matching	By matching	By MS/MS	By MS/MS	By MS/MS	By MS/MS	0	0	16.6	32.2
gi|130781|sp|P09874.4|PARP1_HUMAN	gi|130781|sp|P09874.4|PARP1_HUMAN	31	31	31	>gi|130781|sp|P09874.4|PARP1_HUMAN RecName: Full=Poly [ADP-ribose] polymerase 1; Short=PARP-1; AltName: Full=ADP-ribosyltransferase diphtheria toxin-like 1; Short=ARTD1; AltName: Full=NAD(+) ADP-ribosyltransferase 1; Short=ADPRT 1; AltName: Full=Poly[ADP-r	1	31	31	31	6	10	6	25	25	28	6	10	6	25	25	28	6	10	6	25	25	28	39.6	39.6	39.6	113.08	1014	1014	2.64	5	52	110	1	0	By MS/MS	By MS/MS	By MS/MS	By MS/MS	By MS/MS	By MS/MS	7.8	11.4	7.1	31.5
gi|130848|sp|P25786.1|PSA1_HUMAN	gi|130848|sp|P25786.1|PSA1_HUMAN	8	8	8	>gi|130848|sp|P25786.1|PSA1_HUMAN RecName: Full=Proteasome subunit alpha type-1; AltName: Full=30 kDa prosomal protein; Short=PROS-30; AltName: Full=Macropain subunit C2; AltName: Full=Multicatalytic endopeptidase complex subunit C2; AltName: Full=Proteaso	1	8	8	8	0	0	0	8	8	7	0	0	0	8	8	7	0	0	0	8	8	7	32.7	32.7	32.7	29.555	263	263	1.04	26	1			0	By matching	By matching	By matching	By MS/MS	By MS/MS	By MS/MS	0	0	0	32.7
gi|130850|sp|P25787.2|PSA2_HUMAN	gi|130850|sp|P25787.2|PSA2_HUMAN	7	7	7	>gi|130850|sp|P25787.2|PSA2_HUMAN RecName: Full=Proteasome subunit alpha type-2; AltName: Full=Macropain subunit C3; AltName: Full=Multicatalytic endopeptidase complex subunit C3; AltName: Full=Proteasome component C3	1	7	7	7	0	1	0	6	6	6	0	1	0	6	6	6	0	1	0	6	6	6	43.2	43.2	43.2	25.898	234	234	3.96			1	24	0	By matching	By matching	By matching	By MS/MS	By MS/MS	By MS/MS	0	9	0	37.2
gi|130853|sp|P20618.2|PSB1_HUMAN	gi|130853|sp|P20618.2|PSB1_HUMAN	5	5	5	>gi|130853|sp|P20618.2|PSB1_HUMAN RecName: Full=Proteasome subunit beta type-1; AltName: Full=Macropain subunit C5; AltName: Full=Multicatalytic endopeptidase complex subunit C5; AltName: Full=Proteasome component C5; AltName: Full=Proteasome gamma chain;	1	5	5	5	0	1	0	4	5	4	0	1	0	4	5	4	0	1	0	4	5	4	31.1	31.1	31.1	26.489	241	241	2.58	10	2		12	0	By matching	By matching	By matching	By MS/MS	By MS/MS	By MS/MS	0	5.8	0	23.7
gi|130859|sp|P25788.2|PSA3_HUMAN	gi|130859|sp|P25788.2|PSA3_HUMAN	3	3	3	>gi|130859|sp|P25788.2|PSA3_HUMAN RecName: Full=Proteasome subunit alpha type-3; AltName: Full=Macropain subunit C8; AltName: Full=Multicatalytic endopeptidase complex subunit C8; AltName: Full=Proteasome component C8	1	3	3	3	0	0	1	3	2	3	0	0	1	3	2	3	0	0	1	3	2	3	15.7	15.7	15.7	28.433	255	255	1.45	9		1	1	0	By matching	By matching	By MS/MS	By MS/MS	By MS/MS	By MS/MS	0	0	4.7	15.7
gi|130861|sp|P25789.1|PSA4_HUMAN	gi|130861|sp|P25789.1|PSA4_HUMAN	4	4	4	>gi|130861|sp|P25789.1|PSA4_HUMAN RecName: Full=Proteasome subunit alpha type-4; AltName: Full=Macropain subunit C9; AltName: Full=Multicatalytic endopeptidase complex subunit C9; AltName: Full=Proteasome component C9; AltName: Full=Proteasome subunit L	1	4	4	4	0	0	0	4	4	4	0	0	0	4	4	4	0	0	0	4	4	4	18.4	18.4	18.4	29.483	261	261	1	17				0	By matching	By matching	By matching	By MS/MS	By MS/MS	By MS/MS	0	0	0	18.4
gi|130979|sp|P07737.2|PROF1_HUMAN;CON__P02584	gi|130979|sp|P07737.2|PROF1_HUMAN	6;1	6;1	6;1	>gi|130979|sp|P07737.2|PROF1_HUMAN RecName: Full=Profilin-1; AltName: Full=Epididymis tissue protein Li 184a; AltName: Full=Profilin I	2	6	6	6	0	0	4	4	4	5	0	0	4	4	4	5	0	0	4	4	4	5	51.4	51.4	51.4	15.054	140	140;140	1.05	18	1			0	By matching	By matching	By MS/MS	By MS/MS	By MS/MS	By MS/MS	0	0	38.6	41.4
gi|13123943|sp|O43707.2|ACTN4_HUMAN;gi|17368942|sp|Q9H254.2|SPTN4_HUMAN	gi|13123943|sp|O43707.2|ACTN4_HUMAN	45;1	45;1	30;1	>gi|13123943|sp|O43707.2|ACTN4_HUMAN RecName: Full=Alpha-actinin-4; AltName: Full=Non-muscle alpha-actinin 4	2	45	45	30	5	8	11	42	45	45	5	8	11	42	45	45	2	5	8	27	30	30	63.4	63.4	44.1	104.85	911	911;2564	2.74	9	57	210	2	0	By MS/MS	By MS/MS	By MS/MS	By MS/MS	By MS/MS	By MS/MS	7.4	12.2	16.7	60.6
gi|13123952|sp|Q9Y2T2.1|AP3M1_HUMAN;gi|1703028|sp|P53677.1|AP3M2_HUMAN	gi|13123952|sp|Q9Y2T2.1|AP3M1_HUMAN;gi|1703028|sp|P53677.1|AP3M2_HUMAN	3;2	3;2	3;2	>gi|13123952|sp|Q9Y2T2.1|AP3M1_HUMAN RecName: Full=AP-3 complex subunit mu-1; AltName: Full=AP-3 adaptor complex mu3A subunit; AltName: Full=Adaptor-related protein complex 3 subunit mu-1; AltName: Full=Mu-adaptin 3A; AltName: Full=Mu3A-adaptin;>gi|1703028	2	3	3	3	1	1	1	3	3	3	1	1	1	3	3	3	1	1	1	3	3	3	8.6	8.6	8.6	46.939	418	418;418	2.07	1	11	2		0	By matching	By matching	By matching	By MS/MS	By MS/MS	By MS/MS	2.9	2.9	2.9	8.6
gi|13124003|sp|O95433.1|AHSA1_HUMAN	gi|13124003|sp|O95433.1|AHSA1_HUMAN	3	3	3	>gi|13124003|sp|O95433.1|AHSA1_HUMAN RecName: Full=Activator of 90 kDa heat shock protein ATPase homolog 1; Short=AHA1; AltName: Full=p38	1	3	3	3	0	0	0	3	3	3	0	0	0	3	3	3	0	0	0	3	3	3	11.8	11.8	11.8	38.274	338	338	2.07	1	12		1	0	By matching	By matching	By matching	By MS/MS	By MS/MS	By MS/MS	0	0	0	11.8
gi|13124090|sp|Q9UBF2.1|COPG2_HUMAN	gi|13124090|sp|Q9UBF2.1|COPG2_HUMAN	7	6	6	>gi|13124090|sp|Q9UBF2.1|COPG2_HUMAN RecName: Full=Coatomer subunit gamma-2; AltName: Full=Gamma-2-coat protein; Short=Gamma-2-COP	1	7	6	6	0	0	0	5	6	5	0	0	0	4	5	4	0	0	0	4	5	4	10.8	9.4	9.4	97.621	871	871	2.35		13	7		0	By matching	By matching	By matching	By MS/MS	By MS/MS	By MS/MS	0	0	0	7.2
gi|13124095|sp|Q9UJS0.2|CMC2_HUMAN	gi|13124095|sp|Q9UJS0.2|CMC2_HUMAN	18	18	15	>gi|13124095|sp|Q9UJS0.2|CMC2_HUMAN RecName: Full=Calcium-binding mitochondrial carrier protein Aralar2; AltName: Full=Citrin; AltName: Full=Mitochondrial aspartate glutamate carrier 2; AltName: Full=Solute carrier family 25 member 13	1	18	18	15	0	1	0	18	17	18	0	1	0	18	17	18	0	0	0	15	14	15	35.3	35.3	31	74.175	675	675	2.16		63	12		0	By matching	By matching	By matching	By MS/MS	By MS/MS	By MS/MS	0	1.8	0	35.3
gi|13124097|sp|Q9UNP9.1|PPIE_HUMAN	gi|13124097|sp|Q9UNP9.1|PPIE_HUMAN	1	1	1	>gi|13124097|sp|Q9UNP9.1|PPIE_HUMAN RecName: Full=Peptidyl-prolyl cis-trans isomerase E; Short=PPIase E; AltName: Full=Cyclophilin E; AltName: Full=Cyclophilin-33; AltName: Full=Rotamase E	1	1	1	1	1	0	1	1	1	1	1	0	1	1	1	1	1	0	1	1	1	1	4	4	4	33.43	301	301	1	5				1	By matching	By matching	By matching	By matching	By MS/MS	By matching	4	0	4	4
gi|13124260|sp|Q92538.2|GBF1_HUMAN	gi|13124260|sp|Q92538.2|GBF1_HUMAN	12	12	12	>gi|13124260|sp|Q92538.2|GBF1_HUMAN RecName: Full=Golgi-specific brefeldin A-resistance guanine nucleotide exchange factor 1; Short=BFA-resistant GEF 1	1	12	12	12	0	0	0	10	10	12	0	0	0	10	10	12	0	0	0	10	10	12	9.5	9.5	9.5	206.44	1859	1859	3		1	34	1	0	By matching	By matching	By matching	By MS/MS	By MS/MS	By MS/MS	0	0	0	7.3
gi|13124319|sp|O60282.1|KIF5C_HUMAN;gi|143811412|sp|Q12840.2|KIF5A_HUMAN	gi|13124319|sp|O60282.1|KIF5C_HUMAN;gi|143811412|sp|Q12840.2|KIF5A_HUMAN	9;6	3;1	3;1	>gi|13124319|sp|O60282.1|KIF5C_HUMAN RecName: Full=Kinesin heavy chain isoform 5C; AltName: Full=Kinesin heavy chain neuron-specific 2;>gi|143811412|sp|Q12840.2|KIF5A_HUMAN RecName: Full=Kinesin heavy chain isoform 5A; AltName: Full=Kinesin heavy chain neu	2	9	3	3	2	2	2	9	9	8	0	0	1	3	3	3	0	0	1	3	3	3	12.9	4.9	4.9	109.49	957	957;1032	3			10		0	By matching	By matching	By matching	By MS/MS	By MS/MS	By MS/MS	2.4	2.4	2.5	12.9
gi|13124451|sp|Q99575.2|POP1_HUMAN	gi|13124451|sp|Q99575.2|POP1_HUMAN	13	13	13	>gi|13124451|sp|Q99575.2|POP1_HUMAN RecName: Full=Ribonucleases P/MRP protein subunit POP1; Short=hPOP1	1	13	13	13	0	1	0	11	10	11	0	1	0	11	10	11	0	1	0	11	10	11	16.9	16.9	16.9	114.71	1024	1024	2.97	1		36	1	0	By matching	By matching	By matching	By MS/MS	By MS/MS	By MS/MS	0	0.9	0	15.2
gi|13124489|sp|Q14103.1|HNRPD_HUMAN	gi|13124489|sp|Q14103.1|HNRPD_HUMAN	7	7	7	>gi|13124489|sp|Q14103.1|HNRPD_HUMAN RecName: Full=Heterogeneous nuclear ribonucleoprotein D0; Short=hnRNP D0; AltName: Full=AU-rich element RNA-binding protein 1	1	7	7	7	2	1	2	6	6	4	2	1	2	6	6	4	2	1	2	6	6	4	19.2	19.2	19.2	38.434	355	355	2.06	7	18	3	3	0	By MS/MS	By MS/MS	By MS/MS	By MS/MS	By MS/MS	By MS/MS	6.8	3.9	6.8	18.3
gi|13124514|sp|P78346.1|RPP30_HUMAN	gi|13124514|sp|P78346.1|RPP30_HUMAN	7	7	7	>gi|13124514|sp|P78346.1|RPP30_HUMAN RecName: Full=Ribonuclease P protein subunit p30; Short=RNaseP protein p30; AltName: Full=RNase P subunit 2	1	7	7	7	0	0	0	7	7	6	0	0	0	7	7	6	0	0	0	7	7	6	33.2	33.2	33.2	29.321	268	268	1.04	25	1			0	By matching	By matching	By matching	By MS/MS	By MS/MS	By MS/MS	0	0	0	33.2
gi|13124559|sp|Q13043.2|STK4_HUMAN	gi|13124559|sp|Q13043.2|STK4_HUMAN	3	1	1	>gi|13124559|sp|Q13043.2|STK4_HUMAN RecName: Full=Serine/threonine-protein kinase 4; AltName: Full=Mammalian STE20-like protein kinase 1; Short=MST-1; AltName: Full=STE20-like kinase MST1; AltName: Full=Serine/threonine-protein kinase Krs-2; Contains: RecN	1	3	1	1	0	0	0	2	2	3	0	0	0	1	1	1	0	0	0	1	1	1	9.4	3.3	3.3	55.63	487	487	2		3			0.0021222	By matching	By matching	By matching	By matching	By matching	By MS/MS	0	0	0	6.2
gi|13124562|sp|Q9NRS6.1|SNX15_HUMAN	gi|13124562|sp|Q9NRS6.1|SNX15_HUMAN	2	2	2	>gi|13124562|sp|Q9NRS6.1|SNX15_HUMAN RecName: Full=Sorting nexin-15	1	2	2	2	0	1	0	2	2	2	0	1	0	2	2	2	0	1	0	2	2	2	6.1	6.1	6.1	38.291	342	342	2		7			0.002537	By matching	By matching	By matching	By MS/MS	By MS/MS	By MS/MS	0	2.6	0	6.1
gi|13124667|sp|O43143.2|DHX15_HUMAN	gi|13124667|sp|O43143.2|DHX15_HUMAN	13	13	13	>gi|13124667|sp|O43143.2|DHX15_HUMAN RecName: Full=Pre-mRNA-splicing factor ATP-dependent RNA helicase DHX15; AltName: Full=ATP-dependent RNA helicase #46; AltName: Full=DEAH box protein 15	1	13	13	13	2	2	2	13	12	13	2	2	2	13	12	13	2	2	2	13	12	13	19.5	19.5	19.5	90.932	795	795	2.33		45	22		0	By matching	By MS/MS	By matching	By MS/MS	By MS/MS	By MS/MS	3	2.9	3.4	19.5
gi|13124696|sp|P47756.4|CAPZB_HUMAN	gi|13124696|sp|P47756.4|CAPZB_HUMAN	9	9	9	>gi|13124696|sp|P47756.4|CAPZB_HUMAN RecName: Full=F-actin-capping protein subunit beta; AltName: Full=CapZ beta	1	9	9	9	2	2	1	6	7	8	2	2	1	6	7	8	2	2	1	6	7	8	39.7	39.7	39.7	31.35	277	277	1.6	24	11	7		0	By MS/MS	By matching	By matching	By MS/MS	By MS/MS	By MS/MS	10.1	8.7	3.6	27.8
gi|131467|sp|P18031.1|PTN1_HUMAN	gi|131467|sp|P18031.1|PTN1_HUMAN	7	7	7	>gi|131467|sp|P18031.1|PTN1_HUMAN RecName: Full=Tyrosine-protein phosphatase non-receptor type 1; AltName: Full=Protein-tyrosine phosphatase 1B; Short=PTP-1B	1	7	7	7	1	1	0	5	4	7	1	1	0	5	4	7	1	1	0	5	4	7	21.6	21.6	21.6	49.966	435	435	3.71		3		18	0	By matching	By matching	By matching	By MS/MS	By MS/MS	By MS/MS	3.4	3.4	0	16.6
gi|131528|sp|P26599.1|PTBP1_HUMAN;gi|218511814|sp|O95758.2|PTBP3_HUMAN	gi|131528|sp|P26599.1|PTBP1_HUMAN	14;1	14;1	14;1	>gi|131528|sp|P26599.1|PTBP1_HUMAN RecName: Full=Polypyrimidine tract-binding protein 1; Short=PTB; AltName: Full=57 kDa RNA-binding protein PPTB-1; AltName: Full=Heterogeneous nuclear ribonucleoprotein I; Short=hnRNP I	2	14	14	14	0	1	0	11	13	14	0	1	0	11	13	14	0	1	0	11	13	14	48.2	48.2	48.2	57.221	531	531;552	2.69	1	48	24	21	0	By matching	By matching	By matching	By MS/MS	By MS/MS	By MS/MS	0	2.1	0	34.3
gi|131616|sp|P22102.1|PUR2_HUMAN	gi|131616|sp|P22102.1|PUR2_HUMAN	29	29	29	>gi|131616|sp|P22102.1|PUR2_HUMAN RecName: Full=Trifunctional purine biosynthetic protein adenosine-3; Includes: RecName: Full=Phosphoribosylamine--glycine ligase; AltName: Full=Glycinamide ribonucleotide synthetase; Short=GARS; AltName: Full=Phosphoribosy	1	29	29	29	0	1	0	28	28	29	0	1	0	28	28	29	0	1	0	28	28	29	43.8	43.8	43.8	107.77	1010	1010	3.1		18	113	35	0	By matching	By matching	By matching	By MS/MS	By MS/MS	By MS/MS	0	1.1	0	42
gi|131628|sp|P22234.3|PUR6_HUMAN	gi|131628|sp|P22234.3|PUR6_HUMAN	17	17	17	>gi|131628|sp|P22234.3|PUR6_HUMAN RecName: Full=Multifunctional protein ADE2; Includes: RecName: Full=Phosphoribosylaminoimidazole-succinocarboxamide synthase; AltName: Full=SAICAR synthetase; Includes: RecName: Full=Phosphoribosylaminoimidazole carboxylas	1	17	17	17	3	1	1	16	14	16	3	1	1	16	14	16	3	1	1	16	14	16	39.3	39.3	39.3	47.079	425	425	2.52	10	57	33	20	0	By MS/MS	By MS/MS	By matching	By MS/MS	By MS/MS	By MS/MS	10.1	2.6	3.8	39.3
gi|131708|sp|P11172.1|UMPS_HUMAN	gi|131708|sp|P11172.1|UMPS_HUMAN	5	5	5	>gi|131708|sp|P11172.1|UMPS_HUMAN RecName: Full=Uridine 5-monophosphate synthase; Short=UMP synthase; Includes: RecName: Full=Orotate phosphoribosyltransferase; Short=OPRT; Short=OPRTase; Includes: RecName: Full=Orotidine 5-phosphate decarboxylase; Short	1	5	5	5	0	1	1	5	5	5	0	1	1	5	5	5	0	1	1	5	5	5	14	14	14	52.221	480	480	3.89			2	16	0	By matching	By matching	By matching	By MS/MS	By matching	By MS/MS	0	2.3	3.5	14
gi|131796|sp|P20340.3|RAB6A_HUMAN;gi|46577701|sp|Q14964.2|RB39A_HUMAN	gi|131796|sp|P20340.3|RAB6A_HUMAN	3;1	1;0	1;0	>gi|131796|sp|P20340.3|RAB6A_HUMAN RecName: Full=Ras-related protein Rab-6A; Short=Rab-6	2	3	1	1	0	0	1	3	3	2	0	0	0	1	1	0	0	0	0	1	1	0	17.3	6.7	6.7	23.593	208	208;217	1	3				0.00044267	By matching	By matching	By matching	By matching	By MS/MS	By matching	0	0	5.3	17.3
gi|131834|sp|P11233.1|RALA_HUMAN	gi|131834|sp|P11233.1|RALA_HUMAN	1	1	1	>gi|131834|sp|P11233.1|RALA_HUMAN RecName: Full=Ras-related protein Ral-A; Flags: Precursor	1	1	1	1	0	0	0	1	1	1	0	0	0	1	1	1	0	0	0	1	1	1	7.3	7.3	7.3	23.567	206	206	4				3	0.0057377	By matching	By matching	By matching	By MS/MS	By matching	By MS/MS	0	0	0	7.3
gi|131883|sp|P01111.1|RASN_HUMAN;gi|131869|sp|P01112.1|RASH_HUMAN;gi|131875|sp|P01116.1|RASK_HUMAN	gi|131883|sp|P01111.1|RASN_HUMAN;gi|131869|sp|P01112.1|RASH_HUMAN	3;2;1	3;2;1	3;2;1	>gi|131883|sp|P01111.1|RASN_HUMAN RecName: Full=GTPase NRas; AltName: Full=Transforming protein N-Ras; Flags: Precursor;>gi|131869|sp|P01112.1|RASH_HUMAN RecName: Full=GTPase HRas; AltName: Full=H-Ras-1; AltName: Full=Ha-Ras; AltName: Full=Transforming pro	3	3	3	3	0	0	0	3	3	2	0	0	0	3	3	2	0	0	0	3	3	2	16.9	16.9	16.9	21.229	189	189;189;189	1.11	8	1			0	By matching	By matching	By matching	By MS/MS	By MS/MS	By matching	0	0	0	16.9
gi|132474|sp|P15927.1|RFA2_HUMAN	gi|132474|sp|P15927.1|RFA2_HUMAN	2	2	2	>gi|132474|sp|P15927.1|RFA2_HUMAN RecName: Full=Replication protein A 32 kDa subunit; Short=RP-A p32; AltName: Full=Replication factor A protein 2; Short=RF-A protein 2; AltName: Full=Replication protein A 34 kDa subunit; Short=RP-A p34	1	2	2	2	0	0	0	2	2	2	0	0	0	2	2	2	0	0	0	2	2	2	11.1	11.1	11.1	29.247	270	270	2.29	3	1	1	2	0.00045065	By matching	By matching	By matching	By MS/MS	By MS/MS	By MS/MS	0	0	0	11.1
gi|132559|sp|P04843.1|RPN1_HUMAN	gi|132559|sp|P04843.1|RPN1_HUMAN	12	12	12	>gi|132559|sp|P04843.1|RPN1_HUMAN RecName: Full=Dolichyl-diphosphooligosaccharide--protein glycosyltransferase subunit 1; AltName: Full=Dolichyl-diphosphooligosaccharide--protein glycosyltransferase 67 kDa subunit; AltName: Full=Ribophorin I; Short=RPN-I;	1	12	12	12	1	2	0	11	12	10	1	2	0	11	12	10	1	2	0	11	12	10	30.5	30.5	30.5	68.569	607	607	2.22	1	41	11	1	0	By matching	By matching	By matching	By MS/MS	By MS/MS	By MS/MS	2	4.1	0	28
gi|132573|sp|P13489.2|RINI_HUMAN	gi|132573|sp|P13489.2|RINI_HUMAN	9	9	9	>gi|132573|sp|P13489.2|RINI_HUMAN RecName: Full=Ribonuclease inhibitor; AltName: Full=Placental ribonuclease inhibitor; Short=Placental RNase inhibitor; AltName: Full=Ribonuclease/angiogenin inhibitor 1; Short=RAI	1	9	9	9	1	0	4	8	8	9	1	0	4	8	8	9	1	0	4	8	8	9	31	31	31	49.973	461	461	2.37	10	32	9	12	0	By matching	By matching	By MS/MS	By MS/MS	By MS/MS	By MS/MS	2.2	0	10.8	27.8
gi|132608|sp|P23921.1|RIR1_HUMAN	gi|132608|sp|P23921.1|RIR1_HUMAN	3	3	3	>gi|132608|sp|P23921.1|RIR1_HUMAN RecName: Full=Ribonucleoside-diphosphate reductase large subunit; AltName: Full=Ribonucleoside-diphosphate reductase subunit M1; AltName: Full=Ribonucleotide reductase large subunit	1	3	3	3	0	0	0	3	2	3	0	0	0	3	2	3	0	0	0	3	2	3	7.2	7.2	7.2	90.069	792	792	2		10			0	By matching	By matching	By matching	By MS/MS	By MS/MS	By MS/MS	0	0	0	7.2
gi|132799|sp|P18621.3|RL17_HUMAN	gi|132799|sp|P18621.3|RL17_HUMAN	5	5	5	>gi|132799|sp|P18621.3|RL17_HUMAN RecName: Full=60S ribosomal protein L17; AltName: Full=60S ribosomal protein L23; AltName: Full=PD-1	1	5	5	5	2	1	2	4	4	3	2	1	2	4	4	3	2	1	2	4	4	3	32.1	32.1	32.1	21.397	184	184	1.56	16	4	5		0	By matching	By matching	By matching	By MS/MS	By MS/MS	By MS/MS	13	4.9	10.3	24.5
gi|133021|sp|P18124.1|RL7_HUMAN	gi|133021|sp|P18124.1|RL7_HUMAN	12	12	12	>gi|133021|sp|P18124.1|RL7_HUMAN RecName: Full=60S ribosomal protein L7	1	12	12	12	0	4	8	12	12	11	0	4	8	12	12	11	0	4	8	12	12	11	35.9	35.9	35.9	29.225	248	248	1.47	52	7	7	4	0	By matching	By MS/MS	By MS/MS	By MS/MS	By MS/MS	By MS/MS	0	20.6	34.7	35.9
gi|133041|sp|P05388.1|RLA0_HUMAN;gi|74723863|sp|Q8NHW5.1|RLA0L_HUMAN	gi|133041|sp|P05388.1|RLA0_HUMAN;gi|74723863|sp|Q8NHW5.1|RLA0L_HUMAN	10;8	10;8	10;8	>gi|133041|sp|P05388.1|RLA0_HUMAN RecName: Full=60S acidic ribosomal protein P0; AltName: Full=60S ribosomal protein L10E;>gi|74723863|sp|Q8NHW5.1|RLA0L_HUMAN PUTATIVE PSEUDOGENE: RecName: Full=60S acidic ribosomal protein P0-like	2	10	10	10	0	3	5	9	10	9	0	3	5	9	10	9	0	3	5	9	10	9	50.5	50.5	50.5	34.273	317	317;317	1.76	47	23	8	9	0	By matching	By matching	By MS/MS	By MS/MS	By MS/MS	By MS/MS	0	13.9	21.5	47.6
gi|133051|sp|P05386.1|RLA1_HUMAN	gi|133051|sp|P05386.1|RLA1_HUMAN	2	1	1	>gi|133051|sp|P05386.1|RLA1_HUMAN RecName: Full=60S acidic ribosomal protein P1	1	2	1	1	0	0	0	1	2	2	0	0	0	0	1	1	0	0	0	0	1	1	28.9	14	14	11.514	114	114	1	2				0.0021249	By matching	By matching	By matching	By matching	By MS/MS	By MS/MS	0	0	0	14.9
gi|133061|sp|P05387.1|RLA2_HUMAN	gi|133061|sp|P05387.1|RLA2_HUMAN	4	4	3	>gi|133061|sp|P05387.1|RLA2_HUMAN RecName: Full=60S acidic ribosomal protein P2; AltName: Full=Renal carcinoma antigen NY-REN-44	1	4	4	3	0	0	0	3	3	3	0	0	0	3	3	3	0	0	0	2	2	2	67.8	67.8	53	11.665	115	115	1	9				0	By matching	By matching	By matching	By MS/MS	By MS/MS	By MS/MS	0	0	0	53.9
gi|133257|sp|P22626.2|ROA2_HUMAN	gi|133257|sp|P22626.2|ROA2_HUMAN	4	4	4	>gi|133257|sp|P22626.2|ROA2_HUMAN RecName: Full=Heterogeneous nuclear ribonucleoproteins A2/B1; Short=hnRNP A2/B1	1	4	4	4	1	1	2	4	4	4	1	1	2	4	4	4	1	1	2	4	4	4	18.7	18.7	18.7	37.429	353	353	1.86	8	16	4		0	By matching	By matching	By matching	By MS/MS	By MS/MS	By MS/MS	4.2	2.8	7.1	18.7
gi|133825|sp|P08708.2|RS17_HUMAN	gi|133825|sp|P08708.2|RS17_HUMAN	2	2	2	>gi|133825|sp|P08708.2|RS17_HUMAN RecName: Full=40S ribosomal protein S17	1	2	2	2	0	0	0	2	1	0	0	0	0	2	1	0	0	0	0	2	1	0	18.5	18.5	18.5	15.55	135	135	2	3	2	3		0	By matching	By matching	By matching	By MS/MS	By MS/MS	By matching	0	0	0	18.5
gi|134034150|sp|Q92615.3|LAR4B_HUMAN	gi|134034150|sp|Q92615.3|LAR4B_HUMAN	2	2	2	>gi|134034150|sp|Q92615.3|LAR4B_HUMAN RecName: Full=La-related protein 4B; AltName: Full=La ribonucleoprotein domain family member 4B; AltName: Full=La ribonucleoprotein domain family member 5; AltName: Full=La-related protein 5	1	2	2	2	0	0	0	1	2	1	0	0	0	1	2	1	0	0	0	1	2	1	3.7	3.7	3.7	80.551	738	738	2.4		3	2		0	By matching	By matching	By matching	By MS/MS	By MS/MS	By matching	0	0	0	2.3
gi|134034199|sp|Q96F07.2|CYFP2_HUMAN	gi|134034199|sp|Q96F07.2|CYFP2_HUMAN	6	3	3	>gi|134034199|sp|Q96F07.2|CYFP2_HUMAN RecName: Full=Cytoplasmic FMR1-interacting protein 2; AltName: Full=p53-inducible protein 121	1	6	3	3	0	0	0	5	6	4	0	0	0	2	3	1	0	0	0	2	3	1	5.8	2.9	2.9	148.4	1278	1278	3.14			6	1	0	By matching	By matching	By matching	By MS/MS	By MS/MS	By matching	0	0	0	4.9
gi|134035028|sp|Q8ND24.2|RN214_HUMAN	gi|134035028|sp|Q8ND24.2|RN214_HUMAN	4	4	4	>gi|134035028|sp|Q8ND24.2|RN214_HUMAN RecName: Full=RING finger protein 214	1	4	4	4	1	0	1	4	4	4	1	0	1	4	4	4	1	0	1	4	4	4	7.8	7.8	7.8	77.667	703	703	1.86	2	12			0	By matching	By matching	By matching	By MS/MS	By MS/MS	By MS/MS	1.7	0	1.7	7.8
gi|52783794|sp|P63162.1|RSMN_HUMAN;gi|134037|sp|P14678.2|RSMB_HUMAN	gi|52783794|sp|P63162.1|RSMN_HUMAN;gi|134037|sp|P14678.2|RSMB_HUMAN	2;2	2;2	2;2	>gi|52783794|sp|P63162.1|RSMN_HUMAN RecName: Full=Small nuclear ribonucleoprotein-associated protein N; Short=snRNP-N; AltName: Full=Sm protein D; Short=Sm-D; AltName: Full=Sm protein N; Short=Sm-N; Short=SmN; AltName: Full=Tissue-specific-splicing protein	2	2	2	2	0	0	0	2	2	2	0	0	0	2	2	2	0	0	0	2	2	2	12.1	12.1	12.1	24.614	240	240;240	1	10				0	By matching	By matching	By matching	By MS/MS	By MS/MS	By MS/MS	0	0	0	12.1
gi|134039205|sp|Q04760.4|LGUL_HUMAN	gi|134039205|sp|Q04760.4|LGUL_HUMAN	2	2	2	>gi|134039205|sp|Q04760.4|LGUL_HUMAN RecName: Full=Lactoylglutathione lyase; AltName: Full=Aldoketomutase; AltName: Full=Glyoxalase I; Short=Glx I; AltName: Full=Ketone-aldehyde mutase; AltName: Full=Methylglyoxalase; AltName: Full=S-D-lactoylglutathione m	1	2	2	2	0	0	1	2	2	2	0	0	1	2	2	2	0	0	1	2	2	2	10.3	10.3	10.3	20.777	184	184	2.08	7	2		4	0	By matching	By matching	By matching	By MS/MS	By MS/MS	By MS/MS	0	0	5.4	10.3
gi|134044259|sp|P11177.3|ODPB_HUMAN	gi|134044259|sp|P11177.3|ODPB_HUMAN	10	10	10	>gi|134044259|sp|P11177.3|ODPB_HUMAN RecName: Full=Pyruvate dehydrogenase E1 component subunit beta, mitochondrial; Short=PDHE1-B; Flags: Precursor	1	10	10	10	2	4	4	9	9	9	2	4	4	9	9	9	2	4	4	9	9	9	34	34	34	39.233	359	359	1.82	13	40	1	1	0	By MS/MS	By MS/MS	By MS/MS	By MS/MS	By MS/MS	By MS/MS	7.5	15.3	16.4	34
gi|134047749|sp|Q9Y6G9.3|DC1L1_HUMAN	gi|134047749|sp|Q9Y6G9.3|DC1L1_HUMAN	5	5	5	>gi|134047749|sp|Q9Y6G9.3|DC1L1_HUMAN RecName: Full=Cytoplasmic dynein 1 light intermediate chain 1; Short=LIC1; AltName: Full=Dynein light chain A; Short=DLC-A; AltName: Full=Dynein light intermediate chain 1, cytosolic	1	5	5	5	0	0	0	5	4	4	0	0	0	5	4	4	0	0	0	5	4	4	16.3	16.3	16.3	56.578	523	523	2.06		15	1		0	By matching	By matching	By matching	By MS/MS	By MS/MS	By MS/MS	0	0	0	16.3
gi|134047876|sp|Q92530.2|PSMF1_HUMAN	gi|134047876|sp|Q92530.2|PSMF1_HUMAN	2	2	2	>gi|134047876|sp|Q92530.2|PSMF1_HUMAN RecName: Full=Proteasome inhibitor PI31 subunit; Short=hPI31	1	2	2	2	1	1	1	2	2	1	1	1	1	2	2	1	1	1	1	2	2	1	8.5	8.5	8.5	29.816	271	271	1	12				0	By matching	By matching	By matching	By MS/MS	By MS/MS	By MS/MS	4.4	4.4	4.4	8.5
gi|134047967|sp|Q9H7D7.3|WDR26_HUMAN	gi|134047967|sp|Q9H7D7.3|WDR26_HUMAN	10	10	10	>gi|134047967|sp|Q9H7D7.3|WDR26_HUMAN RecName: Full=WD repeat-containing protein 26; AltName: Full=CUL4- and DDB1-associated WDR protein 2; AltName: Full=Myocardial ischemic preconditioning up-regulated protein 2	1	10	10	10	1	1	1	8	9	8	1	1	1	8	9	8	1	1	1	8	9	8	21	21	21	72.123	661	661	2.24	3	31	15		0	By matching	By matching	By matching	By MS/MS	By MS/MS	By MS/MS	3	2.4	1.5	15.4
gi|134048493|sp|P17858.6|PFKAL_HUMAN	gi|134048493|sp|P17858.6|PFKAL_HUMAN	14	12	11	>gi|134048493|sp|P17858.6|PFKAL_HUMAN RecName: Full=ATP-dependent 6-phosphofructokinase, liver type; Short=ATP-PFK; Short=PFK-L; AltName: Full=6-phosphofructokinase type B; AltName: Full=Phosphofructo-1-kinase isozyme B; Short=PFK-B; AltName: Full=Phosphoh	1	14	12	11	1	1	1	12	14	14	0	0	1	10	12	12	0	0	1	9	11	11	25.8	22.2	21	85.018	780	780	2.14	1	42	6	1	0	By matching	By matching	By matching	By MS/MS	By MS/MS	By MS/MS	2.4	2.4	2.2	19.6
gi|134048676|sp|Q12802.2|AKP13_HUMAN	gi|134048676|sp|Q12802.2|AKP13_HUMAN	7	7	7	>gi|134048676|sp|Q12802.2|AKP13_HUMAN RecName: Full=A-kinase anchor protein 13; Short=AKAP-13; AltName: Full=AKAP-Lbc; AltName: Full=Breast cancer nuclear receptor-binding auxiliary protein; AltName: Full=Guanine nucleotide exchange factor Lbc; AltName: Fu	1	7	7	7	0	0	0	6	6	5	0	0	0	6	6	5	0	0	0	6	6	5	3.5	3.5	3.5	307.55	2813	2813	3.06			17	1	0	By matching	By matching	By matching	By MS/MS	By MS/MS	By MS/MS	0	0	0	3
gi|134092|sp|P09012.3|SNRPA_HUMAN;gi|134095|sp|P08579.1|RU2B_HUMAN	gi|134092|sp|P09012.3|SNRPA_HUMAN	5;1	5;1	5;1	>gi|134092|sp|P09012.3|SNRPA_HUMAN RecName: Full=U1 small nuclear ribonucleoprotein A; Short=U1 snRNP A; Short=U1-A; Short=U1A	2	5	5	5	0	0	0	5	5	4	0	0	0	5	5	4	0	0	0	5	5	4	24.5	24.5	24.5	31.279	282	282;225	1	17				0	By matching	By matching	By matching	By MS/MS	By MS/MS	By MS/MS	0	0	0	24.5
gi|13431310|sp|Q9UKA4.1|AKA11_HUMAN	gi|13431310|sp|Q9UKA4.1|AKA11_HUMAN	3	3	3	>gi|13431310|sp|Q9UKA4.1|AKA11_HUMAN RecName: Full=A-kinase anchor protein 11; Short=AKAP-11; AltName: Full=A-kinase anchor protein 220 kDa; Short=AKAP 220; Short=hAKAP220; AltName: Full=Protein kinase A-anchoring protein 11; Short=PRKA11	1	3	3	3	1	0	0	2	2	3	1	0	0	2	2	3	1	0	0	2	2	3	2.1	2.1	2.1	210.51	1901	1901	3			8		0	By matching	By matching	By matching	By MS/MS	By MS/MS	By MS/MS	0.6	0	0	1.2
gi|13431554|sp|Q9NQX3.1|GEPH_HUMAN	gi|13431554|sp|Q9NQX3.1|GEPH_HUMAN	21	21	21	>gi|13431554|sp|Q9NQX3.1|GEPH_HUMAN RecName: Full=Gephyrin; Includes: RecName: Full=Molybdopterin adenylyltransferase; Short=MPT adenylyltransferase; AltName: Full=Domain G; Includes: RecName: Full=Molybdopterin molybdenumtransferase; Short=MPT Mo-transfer	1	21	21	21	3	3	3	19	19	19	3	3	3	19	19	19	3	3	3	19	19	19	35.7	35.7	35.7	79.748	736	736	2.44		70	52	1	0	By MS/MS	By MS/MS	By matching	By MS/MS	By MS/MS	By MS/MS	5	4.1	4.3	33
gi|13431716|sp|Q9UKX2.1|MYH2_HUMAN	gi|13431716|sp|Q9UKX2.1|MYH2_HUMAN	6	2	2	>gi|13431716|sp|Q9UKX2.1|MYH2_HUMAN RecName: Full=Myosin-2; AltName: Full=Myosin heavy chain 2; AltName: Full=Myosin heavy chain 2a; Short=MyHC-2a; AltName: Full=Myosin heavy chain IIa; Short=MyHC-IIa; AltName: Full=Myosin heavy chain, skeletal muscle, adu	1	6	2	2	1	1	3	4	3	5	1	1	1	2	2	1	1	1	1	2	2	1	3.9	1.2	1.2	223.04	1941	1941	2.67		3	6		0	By matching	By MS/MS	By matching	By matching	By MS/MS	By matching	0.5	0.5	2	2.4
gi|13431764|sp|O95831.1|AIFM1_HUMAN	gi|13431764|sp|O95831.1|AIFM1_HUMAN	14	14	14	>gi|13431764|sp|O95831.1|AIFM1_HUMAN RecName: Full=Apoptosis-inducing factor 1, mitochondrial; AltName: Full=Programmed cell death protein 8; Flags: Precursor	1	14	14	14	3	4	1	14	11	13	3	4	1	14	11	13	3	4	1	14	11	13	29.4	29.4	29.4	66.9	613	613	2.11	3	46	7	1	0	By MS/MS	By MS/MS	By matching	By MS/MS	By MS/MS	By MS/MS	4.7	7.2	1.1	29.4
gi|13431939|sp|Q9Y6A5.1|TACC3_HUMAN	gi|13431939|sp|Q9Y6A5.1|TACC3_HUMAN	22	22	22	>gi|13431939|sp|Q9Y6A5.1|TACC3_HUMAN RecName: Full=Transforming acidic coiled-coil-containing protein 3; AltName: Full=ERIC-1	1	22	22	22	0	0	1	18	21	18	0	0	1	18	21	18	0	0	1	18	21	18	35.9	35.9	35.9	90.359	838	838	2.79	1	17	72		0	By matching	By matching	By matching	By MS/MS	By MS/MS	By MS/MS	0	0	2.4	29.4
gi|13432102|sp|P08243.4|ASNS_HUMAN	gi|13432102|sp|P08243.4|ASNS_HUMAN	10	10	10	>gi|13432102|sp|P08243.4|ASNS_HUMAN RecName: Full=Asparagine synthetase [glutamine-hydrolyzing]; AltName: Full=Cell cycle control protein TS11; AltName: Full=Glutamine-dependent asparagine synthetase	1	10	10	10	1	0	0	10	10	9	1	0	0	10	10	9	1	0	0	10	10	9	26.9	26.9	26.9	64.369	561	561	2.16	1	29	7		0	By matching	By matching	By matching	By MS/MS	By MS/MS	By MS/MS	2	0	0	26.9
gi|13432172|sp|O60488.2|ACSL4_HUMAN	gi|13432172|sp|O60488.2|ACSL4_HUMAN	2	2	2	>gi|13432172|sp|O60488.2|ACSL4_HUMAN RecName: Full=Long-chain-fatty-acid--CoA ligase 4; AltName: Full=Long-chain acyl-CoA synthetase 4; Short=LACS 4	1	2	2	2	0	0	0	1	2	2	0	0	0	1	2	2	0	0	0	1	2	2	4.1	4.1	4.1	79.187	711	711	2.17		5	1		0	By matching	By matching	By matching	By MS/MS	By MS/MS	By matching	0	0	0	2
gi|1345590|sp|P31946.3|1433B_HUMAN	gi|1345590|sp|P31946.3|1433B_HUMAN	9	7	6	>gi|1345590|sp|P31946.3|1433B_HUMAN RecName: Full=14-3-3 protein beta/alpha; AltName: Full=Protein 1054; AltName: Full=Protein kinase C inhibitor protein 1; Short=KCIP-1; Contains: RecName: Full=14-3-3 protein beta/alpha, N-terminally processed	1	9	7	6	0	2	3	8	8	7	0	2	2	6	6	5	0	1	2	5	5	4	36.6	29.3	22.8	28.082	246	246	1.81	23		1	8	0	By matching	By matching	By matching	By MS/MS	By MS/MS	By MS/MS	0	11	13.4	32.1
gi|1345593|sp|Q04917.4|1433F_HUMAN	gi|1345593|sp|Q04917.4|1433F_HUMAN	10	8	8	>gi|1345593|sp|Q04917.4|1433F_HUMAN RecName: Full=14-3-3 protein eta; AltName: Full=Protein AS1	1	10	8	8	1	1	1	10	10	10	1	1	0	8	8	8	1	1	0	8	8	8	35.4	31.3	31.3	28.218	246	246	1.48	32	1	3	4	0	By matching	By matching	By matching	By MS/MS	By MS/MS	By MS/MS	5.7	3.7	3.3	35.4
gi|1345695|sp|P47755.3|CAZA2_HUMAN	gi|1345695|sp|P47755.3|CAZA2_HUMAN	6	5	5	>gi|1345695|sp|P47755.3|CAZA2_HUMAN RecName: Full=F-actin-capping protein subunit alpha-2; AltName: Full=CapZ alpha-2	1	6	5	5	0	0	0	5	6	6	0	0	0	4	5	5	0	0	0	4	5	5	34.6	31.1	31.1	32.949	286	286	1.79	7	15	2		0	By matching	By matching	By matching	By MS/MS	By MS/MS	By MS/MS	0	0	0	25.5
gi|1346188|sp|P48507.1|GSH0_HUMAN	gi|1346188|sp|P48507.1|GSH0_HUMAN	2	2	2	>gi|1346188|sp|P48507.1|GSH0_HUMAN RecName: Full=Glutamate--cysteine ligase regulatory subunit; AltName: Full=GCS light chain; AltName: Full=Gamma-ECS regulatory subunit; AltName: Full=Gamma-glutamylcysteine synthetase regulatory subunit; AltName: Full=Glu	1	2	2	2	1	0	0	2	2	2	1	0	0	2	2	2	1	0	0	2	2	2	9.9	9.9	9.9	30.727	274	274	1	7				0	By matching	By matching	By matching	By MS/MS	By MS/MS	By MS/MS	5.1	0	0	9.9
gi|1346355|sp|Q01813.2|PFKAP_HUMAN	gi|1346355|sp|Q01813.2|PFKAP_HUMAN	17	17	15	>gi|1346355|sp|Q01813.2|PFKAP_HUMAN RecName: Full=ATP-dependent 6-phosphofructokinase, platelet type; Short=ATP-PFK; Short=PFK-P; AltName: Full=6-phosphofructokinase type C; AltName: Full=Phosphofructo-1-kinase isozyme C; Short=PFK-C; AltName: Full=Phospho	1	17	17	15	1	1	0	14	15	17	1	1	0	14	15	17	0	0	0	12	13	15	26.9	26.9	23.3	85.595	784	784	2.09	3	56	9		0	By matching	By matching	By matching	By MS/MS	By MS/MS	By MS/MS	2.4	2.4	0	24.6
gi|1346431|sp|P47929.2|LEG7_HUMAN	gi|1346431|sp|P47929.2|LEG7_HUMAN	6	6	6	>gi|1346431|sp|P47929.2|LEG7_HUMAN RecName: Full=Galectin-7; Short=Gal-7; AltName: Full=HKL-14; AltName: Full=PI7; AltName: Full=p53-induced gene 1 protein	1	6	6	6	2	1	6	1	0	0	2	1	6	1	0	0	2	1	6	1	0	0	62.5	62.5	62.5	15.075	136	136	1.15	11	2			0	By MS/MS	By MS/MS	By MS/MS	By matching	By matching	By matching	24.3	8.1	62.5	15.4
gi|1346576|sp|P49006.2|MRP_HUMAN	gi|1346576|sp|P49006.2|MRP_HUMAN	1	1	1	>gi|1346576|sp|P49006.2|MRP_HUMAN RecName: Full=MARCKS-related protein; AltName: Full=MARCKS-like protein 1; AltName: Full=Macrophage myristoylated alanine-rich C kinase substrate; Short=Mac-MARCKS; Short=MacMARCKS	1	1	1	1	0	0	0	1	1	1	0	0	0	1	1	1	0	0	0	1	1	1	7.7	7.7	7.7	19.529	195	195	1.4	3	2			0.0004386	By matching	By matching	By matching	By MS/MS	By MS/MS	By MS/MS	0	0	0	7.7
gi|1346694|sp|P49354.1|FNTA_HUMAN	gi|1346694|sp|P49354.1|FNTA_HUMAN	2	2	2	>gi|1346694|sp|P49354.1|FNTA_HUMAN RecName: Full=Protein farnesyltransferase/geranylgeranyltransferase type-1 subunit alpha; AltName: Full=CAAX farnesyltransferase subunit alpha; AltName: Full=FTase-alpha; AltName: Full=Ras proteins prenyltransferase subun	1	2	2	2	1	1	0	2	2	1	1	1	0	2	2	1	1	1	0	2	2	1	6.1	6.1	6.1	44.408	379	379	1.86	1	6			0	By matching	By matching	By matching	By MS/MS	By MS/MS	By MS/MS	2.6	3.4	0	6.1
gi|1346696|sp|P49356.1|FNTB_HUMAN	gi|1346696|sp|P49356.1|FNTB_HUMAN	1	1	1	>gi|1346696|sp|P49356.1|FNTB_HUMAN RecName: Full=Protein farnesyltransferase subunit beta; Short=FTase-beta; AltName: Full=CAAX farnesyltransferase subunit beta; AltName: Full=Ras proteins prenyltransferase subunit beta	1	1	1	1	0	0	0	0	1	1	0	0	0	0	1	1	0	0	0	0	1	1	3.7	3.7	3.7	48.773	437	437	1.33	2	1			0.0095012	By matching	By matching	By matching	By matching	By matching	By MS/MS	0	0	0	0
gi|1346918|sp|Q00577.2|PURA_HUMAN	gi|1346918|sp|Q00577.2|PURA_HUMAN	4	4	4	>gi|1346918|sp|Q00577.2|PURA_HUMAN RecName: Full=Transcriptional activator protein Pur-alpha; AltName: Full=Purine-rich single-stranded DNA-binding protein alpha	1	4	4	4	0	0	1	4	4	3	0	0	1	4	4	3	0	0	1	4	4	3	19.6	19.6	19.6	34.91	322	322	2.12		15	2		0	By matching	By matching	By MS/MS	By MS/MS	By MS/MS	By MS/MS	0	0	8.1	19.6
gi|1346922|sp|P15151.2|PVR_HUMAN	gi|1346922|sp|P15151.2|PVR_HUMAN	1	1	1	>gi|1346922|sp|P15151.2|PVR_HUMAN RecName: Full=Poliovirus receptor; AltName: Full=Nectin-like protein 5; Short=NECL-5; AltName: CD_antigen=CD155; Flags: Precursor	1	1	1	1	0	0	0	1	1	1	0	0	0	1	1	1	0	0	0	1	1	1	3.1	3.1	3.1	45.302	417	417	2.14		6	1		0	By matching	By matching	By matching	By MS/MS	By MS/MS	By matching	0	0	0	3.1
gi|1346958|sp|P20339.2|RAB5A_HUMAN	gi|1346958|sp|P20339.2|RAB5A_HUMAN	6	3	3	>gi|1346958|sp|P20339.2|RAB5A_HUMAN RecName: Full=Ras-related protein Rab-5A	1	6	3	3	0	0	1	5	5	6	0	0	0	3	3	3	0	0	0	3	3	3	35.8	20.9	20.9	23.658	215	215	3.77	1			12	0	By matching	By matching	By matching	By MS/MS	By MS/MS	By MS/MS	0	0	5.1	31.2
gi|134811|sp|P19623.1|SPEE_HUMAN	gi|134811|sp|P19623.1|SPEE_HUMAN	8	8	8	>gi|134811|sp|P19623.1|SPEE_HUMAN RecName: Full=Spermidine synthase; Short=SPDSY; AltName: Full=Putrescine aminopropyltransferase	1	8	8	8	0	0	1	8	8	8	0	0	1	8	8	8	0	0	1	8	8	8	31.1	31.1	31.1	33.824	302	302	1.16	28	3	1		0	By matching	By matching	By matching	By MS/MS	By MS/MS	By MS/MS	0	0	3.3	31.1
gi|134973|sp|P16949.3|STMN1_HUMAN;gi|51704330|sp|Q93045.3|STMN2_HUMAN	gi|134973|sp|P16949.3|STMN1_HUMAN;gi|51704330|sp|Q93045.3|STMN2_HUMAN	2;1	2;1	2;1	>gi|134973|sp|P16949.3|STMN1_HUMAN RecName: Full=Stathmin; AltName: Full=Leukemia-associated phosphoprotein p18; AltName: Full=Metablastin; AltName: Full=Oncoprotein 18; Short=Op18; AltName: Full=Phosphoprotein p19; Short=pp19; AltName: Full=Prosolin; AltN	2	2	2	2	0	0	0	2	2	2	0	0	0	2	2	2	0	0	0	2	2	2	14.8	14.8	14.8	17.302	149	149;179	1	6				0.0017369	By matching	By matching	By matching	By MS/MS	By MS/MS	By MS/MS	0	0	0	14.8
gi|1350554|sp|P18615.3|NELFE_HUMAN	gi|1350554|sp|P18615.3|NELFE_HUMAN	3	3	3	>gi|1350554|sp|P18615.3|NELFE_HUMAN RecName: Full=Negative elongation factor E; Short=NELF-E; AltName: Full=RNA-binding protein RD	1	3	3	3	0	0	0	3	2	2	0	0	0	3	2	2	0	0	0	3	2	2	9.2	9.2	9.2	43.239	380	380	2		7			0	By matching	By matching	By matching	By MS/MS	By MS/MS	By matching	0	0	0	9.2
gi|1350579|sp|P27694.2|RFA1_HUMAN	gi|1350579|sp|P27694.2|RFA1_HUMAN	14	14	14	>gi|1350579|sp|P27694.2|RFA1_HUMAN RecName: Full=Replication protein A 70 kDa DNA-binding subunit; Short=RP-A p70; AltName: Full=Replication factor A protein 1; Short=RF-A protein 1; AltName: Full=Single-stranded DNA-binding protein; Contains: RecName: Ful	1	14	14	14	1	0	0	12	12	13	1	0	0	12	12	13	1	0	0	12	12	13	32.5	32.5	32.5	68.137	616	616	2.19		49	9	1	0	By matching	By matching	By matching	By MS/MS	By MS/MS	By MS/MS	1.9	0	0	29.4
gi|1350706|sp|P47914.2|RL29_HUMAN	gi|1350706|sp|P47914.2|RL29_HUMAN	2	2	2	>gi|1350706|sp|P47914.2|RL29_HUMAN RecName: Full=60S ribosomal protein L29; AltName: Full=Cell surface heparin-binding protein HIP	1	2	2	2	1	1	1	2	2	2	1	1	1	2	2	2	1	1	1	2	2	2	14.5	14.5	14.5	17.752	159	159	2.61	7	6	6	9	0	By MS/MS	By MS/MS	By MS/MS	By MS/MS	By MS/MS	By MS/MS	9.4	9.4	9.4	14.5
gi|1350762|sp|Q02878.3|RL6_HUMAN	gi|1350762|sp|Q02878.3|RL6_HUMAN	11	11	11	>gi|1350762|sp|Q02878.3|RL6_HUMAN RecName: Full=60S ribosomal protein L6; AltName: Full=Neoplasm-related protein C140; AltName: Full=Tax-responsive enhancer element-binding protein 107; Short=TaxREB107	1	11	11	11	3	0	2	8	9	8	3	0	2	8	9	8	3	0	2	8	9	8	37.8	37.8	37.8	32.728	288	288	2.21	4	28	9	2	0	By MS/MS	By matching	By matching	By MS/MS	By MS/MS	By MS/MS	10.8	0	5.9	34.7
gi|1351170|sp|P47897.1|SYQ_HUMAN	gi|1351170|sp|P47897.1|SYQ_HUMAN	16	16	16	>gi|1351170|sp|P47897.1|SYQ_HUMAN RecName: Full=Glutamine--tRNA ligase; AltName: Full=Glutaminyl-tRNA synthetase; Short=GlnRS	1	16	16	16	1	0	1	14	15	14	1	0	1	14	15	14	1	0	1	14	15	14	22.3	22.3	22.3	87.798	775	775	2.15	5	41	12	1	0	By matching	By matching	By matching	By MS/MS	By MS/MS	By MS/MS	1.3	0	1.2	19.4
gi|1351211|sp|P48643.1|TCPE_HUMAN	gi|1351211|sp|P48643.1|TCPE_HUMAN	26	26	26	>gi|1351211|sp|P48643.1|TCPE_HUMAN RecName: Full=T-complex protein 1 subunit epsilon; Short=TCP-1-epsilon; AltName: Full=CCT-epsilon	1	26	26	26	2	4	0	23	23	24	2	4	0	23	23	24	2	4	0	23	23	24	61.4	61.4	61.4	59.67	541	541	2.17	6	113	22	4	0	By MS/MS	By matching	By matching	By MS/MS	By MS/MS	By MS/MS	4.1	5.7	0	57.5
gi|135123|sp|P12081.2|SYHC_HUMAN;gi|1351156|sp|P49590.1|SYHM_HUMAN	gi|135123|sp|P12081.2|SYHC_HUMAN	4;1	4;1	4;1	>gi|135123|sp|P12081.2|SYHC_HUMAN RecName: Full=Histidine--tRNA ligase, cytoplasmic; AltName: Full=Histidyl-tRNA synthetase; Short=HisRS	2	4	4	4	0	0	0	2	2	4	0	0	0	2	2	4	0	0	0	2	2	4	11.4	11.4	11.4	57.41	509	509;506	3.89			1	8	0	By matching	By matching	By matching	By MS/MS	By MS/MS	By MS/MS	0	0	0	6.9
gi|1351366|sp|P13807.2|GYS1_HUMAN;gi|288558811|sp|P54840.2|GYS2_HUMAN	gi|1351366|sp|P13807.2|GYS1_HUMAN	3;1	3;1	3;1	>gi|1351366|sp|P13807.2|GYS1_HUMAN RecName: Full=Glycogen [starch] synthase, muscle	2	3	3	3	0	0	0	3	2	2	0	0	0	3	2	2	0	0	0	3	2	2	4.9	4.9	4.9	83.785	737	737;703	2.22		7	2		0	By matching	By matching	By matching	By MS/MS	By MS/MS	By matching	0	0	0	4.9
gi|135191|sp|P23381.2|SYWC_HUMAN	gi|135191|sp|P23381.2|SYWC_HUMAN	7	7	7	>gi|135191|sp|P23381.2|SYWC_HUMAN RecName: Full=Tryptophan--tRNA ligase, cytoplasmic; AltName: Full=Interferon-induced protein 53; Short=IFP53; AltName: Full=Tryptophanyl-tRNA synthetase; Short=TrpRS; Short=hWRS; Contains: RecName: Full=T1-TrpRS; Contains:	1	7	7	7	0	0	0	5	5	6	0	0	0	5	5	6	0	0	0	5	5	6	25.1	25.1	25.1	53.165	471	471	2.64		17		8	0	By matching	By matching	By matching	By MS/MS	By MS/MS	By MS/MS	0	0	0	19.1
gi|1351970|sp|P48444.1|COPD_HUMAN	gi|1351970|sp|P48444.1|COPD_HUMAN	10	10	10	>gi|1351970|sp|P48444.1|COPD_HUMAN RecName: Full=Coatomer subunit delta; AltName: Full=Archain; AltName: Full=Delta-coat protein; Short=Delta-COP	1	10	10	10	0	0	0	9	8	8	0	0	0	9	8	8	0	0	0	9	8	8	20.5	20.5	20.5	57.21	511	511	2.03		28	1		0	By matching	By matching	By matching	By MS/MS	By MS/MS	By MS/MS	0	0	0	18.8
gi|1352049|sp|P48047.1|ATPO_HUMAN	gi|1352049|sp|P48047.1|ATPO_HUMAN	4	4	4	>gi|1352049|sp|P48047.1|ATPO_HUMAN RecName: Full=ATP synthase subunit O, mitochondrial; AltName: Full=Oligomycin sensitivity conferral protein; Short=OSCP; Flags: Precursor	1	4	4	4	2	1	3	4	4	4	2	1	3	4	4	4	2	1	3	4	4	4	21.6	21.6	21.6	23.277	213	213	1	18				0	By matching	By matching	By MS/MS	By MS/MS	By MS/MS	By MS/MS	9.9	4.7	15	21.6
gi|1352216|sp|Q05329.1|DCE2_HUMAN	gi|1352216|sp|Q05329.1|DCE2_HUMAN	1	1	1	>gi|1352216|sp|Q05329.1|DCE2_HUMAN RecName: Full=Glutamate decarboxylase 2; AltName: Full=65 kDa glutamic acid decarboxylase; Short=GAD-65; AltName: Full=Glutamate decarboxylase 65 kDa isoform	1	1	1	1	0	0	0	1	0	0	0	0	0	1	0	0	0	0	0	1	0	0	3.4	3.4	3.4	65.411	585	585	4				1	1	By matching	By matching	By matching	By MS/MS	By matching	By matching	0	0	0	3.4
gi|1352267|sp|P49366.1|DHYS_HUMAN	gi|1352267|sp|P49366.1|DHYS_HUMAN	4	4	4	>gi|1352267|sp|P49366.1|DHYS_HUMAN RecName: Full=Deoxyhypusine synthase; Short=DHS	1	4	4	4	0	1	0	2	4	4	0	1	0	2	4	4	0	1	0	2	4	4	13.8	13.8	13.8	40.97	369	369	1.91	1	10			0	By matching	By matching	By matching	By MS/MS	By MS/MS	By MS/MS	0	3	0	6.2
gi|1352307|sp|P49005.1|DPOD2_HUMAN	gi|1352307|sp|P49005.1|DPOD2_HUMAN	4	4	4	>gi|1352307|sp|P49005.1|DPOD2_HUMAN RecName: Full=DNA polymerase delta subunit 2; AltName: Full=DNA polymerase delta subunit p50	1	4	4	4	0	0	1	4	4	4	0	0	1	4	4	4	0	0	1	4	4	4	12.4	12.4	12.4	51.289	469	469	3.47	2	1		12	0	By matching	By matching	By matching	By MS/MS	By MS/MS	By MS/MS	0	0	3	12.4
gi|1352435|sp|P06730.2|IF4E_HUMAN	gi|1352435|sp|P06730.2|IF4E_HUMAN	2	2	2	>gi|1352435|sp|P06730.2|IF4E_HUMAN RecName: Full=Eukaryotic translation initiation factor 4E; Short=eIF-4E; Short=eIF4E; AltName: Full=eIF-4F 25 kDa subunit; AltName: Full=mRNA cap-binding protein	1	2	2	2	0	0	0	2	2	2	0	0	0	2	2	2	0	0	0	2	2	2	11.5	11.5	11.5	25.097	217	217	3	3			6	0	By matching	By matching	By matching	By MS/MS	By MS/MS	By MS/MS	0	0	0	11.5
gi|1352673|sp|Q08209.1|PP2BA_HUMAN	gi|1352673|sp|Q08209.1|PP2BA_HUMAN	2	2	2	>gi|1352673|sp|Q08209.1|PP2BA_HUMAN RecName: Full=Serine/threonine-protein phosphatase 2B catalytic subunit alpha isoform; AltName: Full=CAM-PRP catalytic subunit; AltName: Full=Calmodulin-dependent calcineurin A subunit alpha isoform	1	2	2	2	0	0	0	2	1	2	0	0	0	2	1	2	0	0	0	2	1	2	6	6	6	58.687	521	521	2.17		5	1		0	By matching	By matching	By matching	By MS/MS	By MS/MS	By MS/MS	0	0	0	6
gi|1352726|sp|P30086.3|PEBP1_HUMAN	gi|1352726|sp|P30086.3|PEBP1_HUMAN	2	2	2	>gi|1352726|sp|P30086.3|PEBP1_HUMAN RecName: Full=Phosphatidylethanolamine-binding protein 1; Short=PEBP-1; AltName: Full=HCNPpp; AltName: Full=Neuropolypeptide h3; AltName: Full=Prostatic-binding protein; AltName: Full=Raf kinase inhibitor protein; Short=	1	2	2	2	0	0	0	1	2	1	0	0	0	1	2	1	0	0	0	1	2	1	18.2	18.2	18.2	21.057	187	187	1	4				0	By matching	By matching	By matching	By MS/MS	By MS/MS	By MS/MS	0	0	0	10.7
gi|135298|sp|P05412.2|JUN_HUMAN	gi|135298|sp|P05412.2|JUN_HUMAN	2	2	2	>gi|135298|sp|P05412.2|JUN_HUMAN RecName: Full=Transcription factor AP-1; AltName: Full=Activator protein 1; Short=AP1; AltName: Full=Proto-oncogene c-Jun; AltName: Full=V-jun avian sarcoma virus 17 oncogene homolog; AltName: Full=p39	1	2	2	2	0	0	0	2	2	2	0	0	0	2	2	2	0	0	0	2	2	2	8.8	8.8	8.8	35.675	331	331	2.12		7	1		0	By matching	By matching	By matching	By matching	By MS/MS	By MS/MS	0	0	0	8.8
gi|135538|sp|P17987.1|TCPA_HUMAN	gi|135538|sp|P17987.1|TCPA_HUMAN	32	32	32	>gi|135538|sp|P17987.1|TCPA_HUMAN RecName: Full=T-complex protein 1 subunit alpha; Short=TCP-1-alpha; AltName: Full=CCT-alpha	1	32	32	32	4	5	3	31	32	29	4	5	3	31	32	29	4	5	3	31	32	29	77.9	77.9	77.9	60.343	556	556	2.31	8	126	57	6	0	By MS/MS	By MS/MS	By matching	By MS/MS	By MS/MS	By MS/MS	8.6	10.3	6.5	74.1
gi|135751|sp|P09110.2|THIK_HUMAN	gi|135751|sp|P09110.2|THIK_HUMAN	4	4	4	>gi|135751|sp|P09110.2|THIK_HUMAN RecName: Full=3-ketoacyl-CoA thiolase, peroxisomal; AltName: Full=Acetyl-CoA acyltransferase; AltName: Full=Beta-ketothiolase; AltName: Full=Peroxisomal 3-oxoacyl-CoA thiolase; Flags: Precursor	1	4	4	4	0	0	0	4	3	4	0	0	0	4	3	4	0	0	0	4	3	4	17.9	17.9	17.9	44.292	424	424	2		11			0	By matching	By matching	By matching	By MS/MS	By MS/MS	By MS/MS	0	0	0	17.9
gi|135755|sp|P24752.1|THIL_HUMAN	gi|135755|sp|P24752.1|THIL_HUMAN	12	12	12	>gi|135755|sp|P24752.1|THIL_HUMAN RecName: Full=Acetyl-CoA acetyltransferase, mitochondrial; AltName: Full=Acetoacetyl-CoA thiolase; AltName: Full=T2; Flags: Precursor	1	12	12	12	1	2	1	11	11	9	1	2	1	11	11	9	1	2	1	11	11	9	38.6	38.6	38.6	45.199	427	427	2.12	5	46	6	3	0	By MS/MS	By MS/MS	By MS/MS	By MS/MS	By MS/MS	By MS/MS	3	8.2	3	36.5
gi|135773|sp|P10599.3|THIO_HUMAN	gi|135773|sp|P10599.3|THIO_HUMAN	4	4	4	>gi|135773|sp|P10599.3|THIO_HUMAN RecName: Full=Thioredoxin; Short=Trx; AltName: Full=ATL-derived factor; Short=ADF; AltName: Full=Surface-associated sulphydryl protein; Short=SASP	1	4	4	4	1	0	1	1	3	4	1	0	1	1	3	4	1	0	1	1	3	4	34.3	34.3	34.3	11.737	105	105	1.82	10	2	3	2	0	By matching	By matching	By matching	By MS/MS	By MS/MS	By MS/MS	12.4	0	10.5	10.5
gi|135807|sp|P00734.2|THRB_HUMAN	gi|135807|sp|P00734.2|THRB_HUMAN	1	1	1	>gi|135807|sp|P00734.2|THRB_HUMAN RecName: Full=Prothrombin; AltName: Full=Coagulation factor II; Contains: RecName: Full=Activation peptide fragment 1; Contains: RecName: Full=Activation peptide fragment 2; Contains: RecName: Full=Thrombin light chain; Co	1	1	1	1	0	0	1	0	0	0	0	0	1	0	0	0	0	0	1	0	0	0	2.1	2.1	2.1	70.036	622	622	1	1				0	By matching	By matching	By MS/MS	By matching	By matching	By matching	0	0	2.1	0
gi|13626745|sp|Q9H2C0.1|GAN_HUMAN	gi|13626745|sp|Q9H2C0.1|GAN_HUMAN	2	2	2	>gi|13626745|sp|Q9H2C0.1|GAN_HUMAN RecName: Full=Gigaxonin; AltName: Full=Kelch-like protein 16	1	2	2	2	0	0	1	1	2	1	0	0	1	1	2	1	0	0	1	1	2	1	4.2	4.2	4.2	67.638	597	597	1.8	1	4			0	By matching	By matching	By MS/MS	By MS/MS	By MS/MS	By MS/MS	0	0	2.3	2.3
gi|13629600|sp|Q9Y2U8.2|MAN1_HUMAN	gi|13629600|sp|Q9Y2U8.2|MAN1_HUMAN	2	2	2	>gi|13629600|sp|Q9Y2U8.2|MAN1_HUMAN RecName: Full=Inner nuclear membrane protein Man1; AltName: Full=LEM domain-containing protein 3	1	2	2	2	0	0	0	1	1	2	0	0	0	1	1	2	0	0	0	1	1	2	4.7	4.7	4.7	99.996	911	911	3			4		0	By matching	By matching	By matching	By matching	By MS/MS	By MS/MS	0	0	0	2.7
gi|13631947|sp|Q9H1E3.1|NUCKS_HUMAN	gi|13631947|sp|Q9H1E3.1|NUCKS_HUMAN	2	2	2	>gi|13631947|sp|Q9H1E3.1|NUCKS_HUMAN RecName: Full=Nuclear ubiquitous casein and cyclin-dependent kinase substrate 1; AltName: Full=P1	1	2	2	2	0	0	0	1	2	1	0	0	0	1	2	1	0	0	0	1	2	1	12.8	12.8	12.8	27.296	243	243	2		4			0	By matching	By matching	By matching	By matching	By MS/MS	By matching	0	0	0	4.5
gi|13632176|sp|Q9Y5Y2.1|NUBP2_HUMAN	gi|13632176|sp|Q9Y5Y2.1|NUBP2_HUMAN	1	1	1	>gi|13632176|sp|Q9Y5Y2.1|NUBP2_HUMAN RecName: Full=Cytosolic Fe-S cluster assembly factor NUBP2; AltName: Full=Nucleotide-binding protein 2; Short=NBP 2	1	1	1	1	0	0	1	1	1	1	0	0	1	1	1	1	0	0	1	1	1	1	5.2	5.2	5.2	28.825	271	271	1	4				1	By matching	By matching	By matching	By MS/MS	By matching	By matching	0	0	5.2	5.2
gi|13632817|sp|Q9UQ80.3|PA2G4_HUMAN	gi|13632817|sp|Q9UQ80.3|PA2G4_HUMAN	16	16	16	>gi|13632817|sp|Q9UQ80.3|PA2G4_HUMAN RecName: Full=Proliferation-associated protein 2G4; AltName: Full=Cell cycle protein p38-2G4 homolog; Short=hG4-1; AltName: Full=ErbB3-binding protein 1	1	16	16	16	4	4	9	14	15	16	4	4	9	14	15	16	4	4	9	14	15	16	43.1	43.1	43.1	43.786	394	394	2.15	12	69	13	7	0	By MS/MS	By MS/MS	By MS/MS	By MS/MS	By MS/MS	By MS/MS	9.6	9.6	27.2	38.6
gi|13633595|sp|Q9NRW1.1|RAB6B_HUMAN	gi|13633595|sp|Q9NRW1.1|RAB6B_HUMAN	4	4	2	>gi|13633595|sp|Q9NRW1.1|RAB6B_HUMAN RecName: Full=Ras-related protein Rab-6B	1	4	4	2	1	1	1	4	4	3	1	1	1	4	4	3	1	1	0	2	2	1	22.1	22.1	11.5	23.461	208	208	2.2	11	1	1	7	0	By matching	By matching	By matching	By MS/MS	By MS/MS	By MS/MS	4.8	4.8	5.3	22.1
gi|13633613|sp|Q9UL25.3|RAB21_HUMAN	gi|13633613|sp|Q9UL25.3|RAB21_HUMAN	2	2	2	>gi|13633613|sp|Q9UL25.3|RAB21_HUMAN RecName: Full=Ras-related protein Rab-21; Flags: Precursor	1	2	2	2	0	0	0	2	1	1	0	0	0	2	1	1	0	0	0	2	1	1	13.3	13.3	13.3	24.347	225	225	4				4	0	By matching	By matching	By matching	By MS/MS	By matching	By matching	0	0	0	13.3
gi|13633893|sp|P82650.1|RT22_HUMAN	gi|13633893|sp|P82650.1|RT22_HUMAN	7	7	7	>gi|13633893|sp|P82650.1|RT22_HUMAN RecName: Full=28S ribosomal protein S22, mitochondrial; Short=MRP-S22; Short=S22mt	1	7	7	7	1	0	0	7	6	6	1	0	0	7	6	6	1	0	0	7	6	6	23.1	23.1	23.1	41.28	360	360	1.9	2	19			0	By MS/MS	By matching	By matching	By MS/MS	By MS/MS	By MS/MS	3.3	0	0	23.1
gi|13633894|sp|P82663.1|RT25_HUMAN	gi|13633894|sp|P82663.1|RT25_HUMAN	1	1	1	>gi|13633894|sp|P82663.1|RT25_HUMAN RecName: Full=28S ribosomal protein S25, mitochondrial; Short=MRP-S25; Short=S25mt	1	1	1	1	0	0	0	1	1	1	0	0	0	1	1	1	0	0	0	1	1	1	5.2	5.2	5.2	20.116	173	173	1.25	3	1			1	By matching	By matching	By matching	By matching	By matching	By MS/MS	0	0	0	5.2
gi|13633951|sp|Q9Y2R5.1|RT17_HUMAN	gi|13633951|sp|Q9Y2R5.1|RT17_HUMAN	1	1	1	>gi|13633951|sp|Q9Y2R5.1|RT17_HUMAN RecName: Full=28S ribosomal protein S17, mitochondrial; Short=MRP-S17; Short=S17mt; Flags: Precursor	1	1	1	1	0	0	0	1	1	1	0	0	0	1	1	1	0	0	0	1	1	1	8.5	8.5	8.5	14.502	130	130	1	3				0.0021231	By matching	By matching	By matching	By MS/MS	By MS/MS	By MS/MS	0	0	0	8.5
gi|13637727|sp|O43583.2|DENR_HUMAN	gi|13637727|sp|O43583.2|DENR_HUMAN	2	2	2	>gi|13637727|sp|O43583.2|DENR_HUMAN RecName: Full=Density-regulated protein; Short=DRP; AltName: Full=Protein DRP1; AltName: Full=Smooth muscle cell-associated protein 3; Short=SMAP-3	1	2	2	2	0	0	0	2	2	2	0	0	0	2	2	2	0	0	0	2	2	2	17.7	17.7	17.7	22.092	198	198	2	6			3	0	By matching	By matching	By matching	By MS/MS	By matching	By MS/MS	0	0	0	17.7
gi|13638228|sp|P50395.2|GDIB_HUMAN	gi|13638228|sp|P50395.2|GDIB_HUMAN	6	3	3	>gi|13638228|sp|P50395.2|GDIB_HUMAN RecName: Full=Rab GDP dissociation inhibitor beta; Short=Rab GDI beta; AltName: Full=Guanosine diphosphate dissociation inhibitor 2; Short=GDI-2	1	6	3	3	0	0	0	6	6	6	0	0	0	3	3	3	0	0	0	3	3	3	21.3	8.5	8.5	50.663	445	445	4				9	0	By matching	By matching	By matching	By MS/MS	By MS/MS	By MS/MS	0	0	0	21.3
gi|13638437|sp|P08047.3|SP1_HUMAN	gi|13638437|sp|P08047.3|SP1_HUMAN	2	2	2	>gi|13638437|sp|P08047.3|SP1_HUMAN RecName: Full=Transcription factor Sp1	1	2	2	2	0	0	0	2	2	2	0	0	0	2	2	2	0	0	0	2	2	2	5.5	5.5	5.5	80.692	785	785	2.14		6	1		0	By matching	By matching	By matching	By MS/MS	By MS/MS	By MS/MS	0	0	0	5.5
gi|13638438|sp|P54577.4|SYYC_HUMAN	gi|13638438|sp|P54577.4|SYYC_HUMAN	16	16	16	>gi|13638438|sp|P54577.4|SYYC_HUMAN RecName: Full=Tyrosine--tRNA ligase, cytoplasmic; AltName: Full=Tyrosyl-tRNA synthetase; Short=TyrRS; Contains: RecName: Full=Tyrosine--tRNA ligase, cytoplasmic, N-terminally processed	1	16	16	16	1	1	1	15	16	13	1	1	1	15	16	13	1	1	1	15	16	13	39.8	39.8	39.8	59.143	528	528	2.02		52	1		0	By MS/MS	By MS/MS	By matching	By MS/MS	By MS/MS	By MS/MS	2.1	2.1	2.1	35.2
gi|136652|sp|P17480.1|UBF1_HUMAN	gi|136652|sp|P17480.1|UBF1_HUMAN	1	1	1	>gi|136652|sp|P17480.1|UBF1_HUMAN RecName: Full=Nucleolar transcription factor 1; AltName: Full=Autoantigen NOR-90; AltName: Full=Upstream-binding factor 1; Short=UBF-1	1	1	1	1	0	0	0	0	1	1	0	0	0	0	1	1	0	0	0	0	1	1	3.4	3.4	3.4	89.405	764	764	4				2	0.0025327	By matching	By matching	By matching	By matching	By matching	By MS/MS	0	0	0	0
gi|136681|sp|P09936.2|UCHL1_HUMAN	gi|136681|sp|P09936.2|UCHL1_HUMAN	6	6	6	>gi|136681|sp|P09936.2|UCHL1_HUMAN RecName: Full=Ubiquitin carboxyl-terminal hydrolase isozyme L1; Short=UCH-L1; AltName: Full=Neuron cytoplasmic protein 9.5; AltName: Full=PGP 9.5; Short=PGP9.5; AltName: Full=Ubiquitin thioesterase L1; Flags: Precursor	1	6	6	6	1	0	0	5	6	6	1	0	0	5	6	6	1	0	0	5	6	6	48.9	48.9	48.9	24.824	223	223	3.57	3			18	0	By matching	By matching	By matching	By MS/MS	By MS/MS	By MS/MS	6.7	0	0	32.7
gi|136682|sp|P15374.1|UCHL3_HUMAN	gi|136682|sp|P15374.1|UCHL3_HUMAN	5	5	5	>gi|136682|sp|P15374.1|UCHL3_HUMAN RecName: Full=Ubiquitin carboxyl-terminal hydrolase isozyme L3; Short=UCH-L3; AltName: Full=Ubiquitin thioesterase L3	1	5	5	5	0	0	0	4	5	5	0	0	0	4	5	5	0	0	0	4	5	5	28.3	28.3	28.3	26.182	230	230	2.2	11	1	1	7	0	By matching	By matching	By matching	By MS/MS	By MS/MS	By MS/MS	0	0	0	24.3
gi|13878553|sp|Q9H0B6.1|KLC2_HUMAN	gi|13878553|sp|Q9H0B6.1|KLC2_HUMAN	4	2	2	>gi|13878553|sp|Q9H0B6.1|KLC2_HUMAN RecName: Full=Kinesin light chain 2; Short=KLC 2	1	4	2	2	0	1	1	3	4	2	0	0	0	2	2	1	0	0	0	2	2	1	10	6.1	6.1	68.934	622	622	2		6			0	By matching	By matching	By matching	By MS/MS	By MS/MS	By MS/MS	0	1.6	1.6	8.4
gi|13878748|sp|Q13868.2|EXOS2_HUMAN	gi|13878748|sp|Q13868.2|EXOS2_HUMAN	5	5	5	>gi|13878748|sp|Q13868.2|EXOS2_HUMAN RecName: Full=Exosome complex component RRP4; AltName: Full=Exosome component 2; AltName: Full=Ribosomal RNA-processing protein 4	1	5	5	5	0	0	0	4	5	4	0	0	0	4	5	4	0	0	0	4	5	4	22.5	22.5	22.5	32.789	293	293	1	16				0	By matching	By matching	By matching	By MS/MS	By MS/MS	By MS/MS	0	0	0	19.1
gi|13959554|sp|P82921.2|RT21_HUMAN	gi|13959554|sp|P82921.2|RT21_HUMAN	1	1	1	>gi|13959554|sp|P82921.2|RT21_HUMAN RecName: Full=28S ribosomal protein S21, mitochondrial; Short=MRP-S21; Short=S21mt	1	1	1	1	1	0	0	0	1	1	1	0	0	0	1	1	1	0	0	0	1	1	16.1	16.1	16.1	10.741	87	87	1	3				1	By MS/MS	By matching	By matching	By matching	By matching	By matching	16.1	0	0	0
gi|13959709|sp|P11388.3|TOP2A_HUMAN;gi|20141946|sp|Q02880.3|TOP2B_HUMAN	gi|13959709|sp|P11388.3|TOP2A_HUMAN	5;2	5;2	5;2	>gi|13959709|sp|P11388.3|TOP2A_HUMAN RecName: Full=DNA topoisomerase 2-alpha; AltName: Full=DNA topoisomerase II, alpha isozyme	2	5	5	5	0	0	0	4	5	4	0	0	0	4	5	4	0	0	0	4	5	4	4.8	4.8	4.8	174.38	1531	1531;1626	3			13		0	By matching	By matching	By matching	By MS/MS	By MS/MS	By MS/MS	0	0	0	3.7
gi|139641|sp|P02774.1|VTDB_HUMAN	gi|139641|sp|P02774.1|VTDB_HUMAN	4	4	4	>gi|139641|sp|P02774.1|VTDB_HUMAN RecName: Full=Vitamin D-binding protein; Short=DBP; Short=VDB; AltName: Full=Gc protein-derived macrophage activating factor; Short=Gc-MAF; Short=GcMAF; AltName: Full=Gc-globulin; AltName: Full=Group-specific component; Sh	1	4	4	4	0	0	4	0	0	0	0	0	4	0	0	0	0	0	4	0	0	0	15	15	15	52.963	474	474	1	4				0	By matching	By matching	By MS/MS	By matching	By matching	By matching	0	0	15	0
gi|139653|sp|P04004.1|VTNC_HUMAN;CON__Q3ZBS7	gi|139653|sp|P04004.1|VTNC_HUMAN	6;1	6;1	6;1	>gi|139653|sp|P04004.1|VTNC_HUMAN RecName: Full=Vitronectin; Short=VN; AltName: Full=S-protein; AltName: Full=Serum-spreading factor; AltName: Full=V75; Contains: RecName: Full=Vitronectin V65 subunit; Contains: RecName: Full=Vitronectin V10 subunit; Conta	2	6	6	6	0	0	6	1	1	3	0	0	6	1	1	3	0	0	6	1	1	3	17.4	17.4	17.4	54.305	478	478;484	1.5	7	4	1		0	By matching	By matching	By MS/MS	By matching	By matching	By matching	0	0	17.4	2.7
gi|14285410|sp|Q9Y3B2.1|EXOS1_HUMAN	gi|14285410|sp|Q9Y3B2.1|EXOS1_HUMAN	1	1	1	>gi|14285410|sp|Q9Y3B2.1|EXOS1_HUMAN RecName: Full=Exosome complex component CSL4; AltName: Full=Exosome component 1	1	1	1	1	0	0	0	1	1	1	0	0	0	1	1	1	0	0	0	1	1	1	8.2	8.2	8.2	21.452	195	195	1	3				0.0076613	By matching	By matching	By matching	By matching	By MS/MS	By matching	0	0	0	8.2
gi|14285497|sp|O14920.1|IKKB_HUMAN	gi|14285497|sp|O14920.1|IKKB_HUMAN	3	3	3	>gi|14285497|sp|O14920.1|IKKB_HUMAN RecName: Full=Inhibitor of nuclear factor kappa-B kinase subunit beta; Short=I-kappa-B-kinase beta; Short=IKK-B; Short=IKK-beta; Short=IkBKB; AltName: Full=I-kappa-B kinase 2; Short=IKK2; AltName: Full=Nuclear factor NF-	1	3	3	3	0	0	0	2	3	2	0	0	0	2	3	2	0	0	0	2	3	2	4.6	4.6	4.6	86.563	756	756	2.3		7	3		0	By matching	By matching	By matching	By MS/MS	By MS/MS	By MS/MS	0	0	0	3.4
gi|14285643|sp|O94826.1|TOM70_HUMAN	gi|14285643|sp|O94826.1|TOM70_HUMAN	10	10	10	>gi|14285643|sp|O94826.1|TOM70_HUMAN RecName: Full=Mitochondrial import receptor subunit TOM70; AltName: Full=Mitochondrial precursor proteins import receptor; AltName: Full=Translocase of outer membrane 70 kDa subunit; AltName: Full=Translocase of outer m	1	10	10	10	0	1	0	9	10	9	0	1	0	9	10	9	0	1	0	9	10	9	23.5	23.5	23.5	67.454	608	608	2.21	1	37	9	1	0	By matching	By matching	By matching	By MS/MS	By MS/MS	By MS/MS	0	1.5	0	17.4
gi|14285685|sp|O14734.1|ACOT8_HUMAN	gi|14285685|sp|O14734.1|ACOT8_HUMAN	1	1	1	>gi|14285685|sp|O14734.1|ACOT8_HUMAN RecName: Full=Acyl-coenzyme A thioesterase 8; Short=Acyl-CoA thioesterase 8; AltName: Full=Choloyl-coenzyme A thioesterase; AltName: Full=HIV-Nef-associated acyl-CoA thioesterase; AltName: Full=PTE-2; AltName: Full=Pero	1	1	1	1	0	0	0	1	1	1	0	0	0	1	1	1	0	0	0	1	1	1	5	5	5	35.914	319	319	1	5				0.0025381	By matching	By matching	By matching	By MS/MS	By matching	By MS/MS	0	0	0	5
gi|14285756|sp|Q9NPD3.3|EXOS4_HUMAN	gi|14285756|sp|Q9NPD3.3|EXOS4_HUMAN	3	3	3	>gi|14285756|sp|Q9NPD3.3|EXOS4_HUMAN RecName: Full=Exosome complex component RRP41; AltName: Full=Exosome component 4; AltName: Full=Ribosomal RNA-processing protein 41; AltName: Full=p12A	1	3	3	3	0	0	1	3	3	3	0	0	1	3	3	3	0	0	1	3	3	3	19.6	19.6	19.6	26.383	245	245	1.92	9			4	0	By matching	By matching	By matching	By MS/MS	By MS/MS	By MS/MS	0	0	4.9	19.6
gi|14285757|sp|Q9NQT4.1|EXOS5_HUMAN	gi|14285757|sp|Q9NQT4.1|EXOS5_HUMAN	1	1	1	>gi|14285757|sp|Q9NQT4.1|EXOS5_HUMAN RecName: Full=Exosome complex component RRP46; AltName: Full=Chronic myelogenous leukemia tumor antigen 28; AltName: Full=Exosome component 5; AltName: Full=Ribosomal RNA-processing protein 46; AltName: Full=p12B	1	1	1	1	0	0	0	1	1	1	0	0	0	1	1	1	0	0	0	1	1	1	5.1	5.1	5.1	25.249	235	235	4				3	0	By matching	By matching	By matching	By MS/MS	By MS/MS	By MS/MS	0	0	0	5.1
gi|14285758|sp|Q9NQT5.3|EXOS3_HUMAN	gi|14285758|sp|Q9NQT5.3|EXOS3_HUMAN	3	3	3	>gi|14285758|sp|Q9NQT5.3|EXOS3_HUMAN RecName: Full=Exosome complex component RRP40; AltName: Full=Exosome component 3; AltName: Full=Ribosomal RNA-processing protein 40; AltName: Full=p10	1	3	3	3	0	0	0	3	3	2	0	0	0	3	3	2	0	0	0	3	3	2	13.5	13.5	13.5	29.572	275	275	1.18	10		1		0	By matching	By matching	By matching	By MS/MS	By MS/MS	By MS/MS	0	0	0	13.5
gi|14548013|sp|Q9NR31.1|SAR1A_HUMAN;gi|14285769|sp|Q9Y6B6.1|SAR1B_HUMAN	gi|14548013|sp|Q9NR31.1|SAR1A_HUMAN;gi|14285769|sp|Q9Y6B6.1|SAR1B_HUMAN	1;1	1;1	1;1	>gi|14548013|sp|Q9NR31.1|SAR1A_HUMAN RecName: Full=GTP-binding protein SAR1a; AltName: Full=COPII-associated small GTPase;>gi|14285769|sp|Q9Y6B6.1|SAR1B_HUMAN RecName: Full=GTP-binding protein SAR1b; AltName: Full=GTP-binding protein B; Short=GTBPB	2	1	1	1	0	0	0	1	1	1	0	0	0	1	1	1	0	0	0	1	1	1	5.6	5.6	5.6	22.367	198	198;198	1	3				0.00044385	By matching	By matching	By matching	By matching	By MS/MS	By MS/MS	0	0	0	5.6
gi|14286104|sp|P20020.3|AT2B1_HUMAN;gi|14286115|sp|Q01814.2|AT2B2_HUMAN	gi|14286104|sp|P20020.3|AT2B1_HUMAN;gi|14286115|sp|Q01814.2|AT2B2_HUMAN	11;6	11;6	5;1	>gi|14286104|sp|P20020.3|AT2B1_HUMAN RecName: Full=Plasma membrane calcium-transporting ATPase 1; Short=PMCA1; AltName: Full=Plasma membrane calcium ATPase isoform 1; AltName: Full=Plasma membrane calcium pump isoform 1;>gi|14286115|sp|Q01814.2|AT2B2_HUMAN	2	11	11	5	1	0	1	11	8	8	1	0	1	11	8	8	1	0	1	5	4	4	10.1	10.1	5.4	138.75	1258	1258;1243	2.91	1	1	30		0	By matching	By matching	By matching	By MS/MS	By MS/MS	By MS/MS	1	0	1	10.1
gi|14286105|sp|P23634.2|AT2B4_HUMAN;gi|116241261|sp|Q16720.3|AT2B3_HUMAN	gi|14286105|sp|P23634.2|AT2B4_HUMAN;gi|116241261|sp|Q16720.3|AT2B3_HUMAN	9;6	3;0	3;0	>gi|14286105|sp|P23634.2|AT2B4_HUMAN RecName: Full=Plasma membrane calcium-transporting ATPase 4; Short=PMCA4; AltName: Full=Matrix-remodeling-associated protein 1; AltName: Full=Plasma membrane calcium ATPase isoform 4; AltName: Full=Plasma membrane calci	2	9	3	3	0	0	0	9	5	6	0	0	0	3	1	2	0	0	0	3	1	2	9.5	4.8	4.8	137.92	1241	1241;1220	3			6		0	By matching	By matching	By matching	By MS/MS	By MS/MS	By MS/MS	0	0	0	9.5
gi|143743108|sp|O60763.2|USO1_HUMAN	gi|143743108|sp|O60763.2|USO1_HUMAN	21	21	21	>gi|143743108|sp|O60763.2|USO1_HUMAN RecName: Full=General vesicular transport factor p115; AltName: Full=Protein USO1 homolog; AltName: Full=Transcytosis-associated protein; Short=TAP; AltName: Full=Vesicle-docking protein	1	21	21	21	3	1	1	19	20	20	3	1	1	19	20	20	3	1	1	19	20	20	32	32	32	107.89	962	962	2.96		4	71	1	0	By MS/MS	By MS/MS	By MS/MS	By MS/MS	By MS/MS	By MS/MS	5.2	1.9	1.9	25.8
gi|143811354|sp|Q15436.2|SC23A_HUMAN	gi|143811354|sp|Q15436.2|SC23A_HUMAN	11	11	9	>gi|143811354|sp|Q15436.2|SC23A_HUMAN RecName: Full=Protein transport protein Sec23A; AltName: Full=SEC23-related protein A	1	11	11	9	0	0	0	11	9	11	0	0	0	11	9	11	0	0	0	9	8	9	19.7	19.7	16.3	86.16	765	765	2.03		33	1		0	By matching	By matching	By matching	By MS/MS	By MS/MS	By MS/MS	0	0	0	19.7
gi|143811355|sp|P30153.4|2AAA_HUMAN;gi|116241236|sp|P30154.3|2AAB_HUMAN	gi|143811355|sp|P30153.4|2AAA_HUMAN	13;4	13;4	13;4	>gi|143811355|sp|P30153.4|2AAA_HUMAN RecName: Full=Serine/threonine-protein phosphatase 2A 65 kDa regulatory subunit A alpha isoform; AltName: Full=Medium tumor antigen-associated 61 kDa protein; AltName: Full=PP2A subunit A isoform PR65-alpha; AltName: Fu	2	13	13	13	0	0	0	13	12	11	0	0	0	13	12	11	0	0	0	13	12	11	30.9	30.9	30.9	65.308	589	589;601	2.2		40	8	1	0	By matching	By matching	By matching	By MS/MS	By MS/MS	By MS/MS	0	0	0	30.9
gi|143811359|sp|Q9NRK6.2|ABCBA_HUMAN	gi|143811359|sp|Q9NRK6.2|ABCBA_HUMAN	1	1	1	>gi|143811359|sp|Q9NRK6.2|ABCBA_HUMAN RecName: Full=ATP-binding cassette sub-family B member 10, mitochondrial; AltName: Full=ATP-binding cassette transporter 10; Short=ABC transporter 10 protein; AltName: Full=Mitochondrial ATP-binding cassette 2; Short=M	1	1	1	1	0	0	0	1	1	0	0	0	0	1	1	0	0	0	0	1	1	0	2.2	2.2	2.2	79.147	738	738	2		2			0	By matching	By matching	By matching	By MS/MS	By matching	By matching	0	0	0	2.2
gi|143811366|sp|P11274.2|BCR_HUMAN	gi|143811366|sp|P11274.2|BCR_HUMAN	1	1	1	>gi|143811366|sp|P11274.2|BCR_HUMAN RecName: Full=Breakpoint cluster region protein; AltName: Full=Renal carcinoma antigen NY-REN-26	1	1	1	1	0	0	0	1	1	1	0	0	0	1	1	1	0	0	0	1	1	1	1	1	1	142.82	1271	1271	3			3		1	By matching	By matching	By matching	By MS/MS	By matching	By matching	0	0	0	1
gi|143811368|sp|O60566.3|BUB1B_HUMAN	gi|143811368|sp|O60566.3|BUB1B_HUMAN	6	6	6	>gi|143811368|sp|O60566.3|BUB1B_HUMAN RecName: Full=Mitotic checkpoint serine/threonine-protein kinase BUB1 beta; AltName: Full=MAD3/BUB1-related protein kinase; Short=hBUBR1; AltName: Full=Mitotic checkpoint kinase MAD3L; AltName: Full=Protein SSK1	1	6	6	6	0	1	0	5	5	6	0	1	0	5	5	6	0	1	0	5	5	6	7.8	7.8	7.8	119.54	1050	1050	2.94		1	17		0	By matching	By matching	By matching	By MS/MS	By MS/MS	By MS/MS	0	1	0	5.7
gi|143811421|sp|Q13201.3|MMRN1_HUMAN	gi|143811421|sp|Q13201.3|MMRN1_HUMAN	1	1	1	>gi|143811421|sp|Q13201.3|MMRN1_HUMAN RecName: Full=Multimerin-1; AltName: Full=EMILIN-4; AltName: Full=Elastin microfibril interface located protein 4; Short=Elastin microfibril interfacer 4; AltName: Full=Endothelial cell multimerin; Contains: RecName: F	1	1	1	1	1	0	0	0	0	0	1	0	0	0	0	0	1	0	0	0	0	0	1	1	1	138.11	1228	1228	3			1		1	By MS/MS	By matching	By matching	By matching	By matching	By matching	1	0	0	0
gi|143811423|sp|Q13126.2|MTAP_HUMAN	gi|143811423|sp|Q13126.2|MTAP_HUMAN	3	3	3	>gi|143811423|sp|Q13126.2|MTAP_HUMAN RecName: Full=S-methyl-5-thioadenosine phosphorylase; AltName: Full=5-methylthioadenosine phosphorylase; Short=MTA phosphorylase; Short=MTAP; Short=MTAPase	1	3	3	3	0	0	0	3	3	3	0	0	0	3	3	3	0	0	0	3	3	3	13.4	13.4	13.4	31.236	283	283	1	11				0	By matching	By matching	By matching	By MS/MS	By MS/MS	By MS/MS	0	0	0	13.4
gi|143811429|sp|Q04721.3|NOTC2_HUMAN	gi|143811429|sp|Q04721.3|NOTC2_HUMAN	2	2	2	>gi|143811429|sp|Q04721.3|NOTC2_HUMAN RecName: Full=Neurogenic locus notch homolog protein 2; Short=Notch 2; Short=hN2; Contains: RecName: Full=Notch 2 extracellular truncation; Short=N2ECD; Contains: RecName: Full=Notch 2 intracellular domain; Short=N2ICD	1	2	2	2	0	0	0	2	2	2	0	0	0	2	2	2	0	0	0	2	2	2	1.1	1.1	1.1	265.4	2471	2471	3			6		0	By matching	By matching	By matching	By MS/MS	By MS/MS	By MS/MS	0	0	0	1.1
gi|143811432|sp|Q13177.3|PAK2_HUMAN;gi|47117818|sp|O75914.2|PAK3_HUMAN	gi|143811432|sp|Q13177.3|PAK2_HUMAN;gi|47117818|sp|O75914.2|PAK3_HUMAN	2;1	2;1	1;0	>gi|143811432|sp|Q13177.3|PAK2_HUMAN RecName: Full=Serine/threonine-protein kinase PAK 2; AltName: Full=Gamma-PAK; AltName: Full=PAK65; AltName: Full=S6/H4 kinase; AltName: Full=p21-activated kinase 2; Short=PAK-2; AltName: Full=p58; Contains: RecName: Ful	2	2	2	1	0	0	0	1	2	1	0	0	0	1	2	1	0	0	0	1	1	1	4.8	4.8	3.1	58.042	524	524;559	2		4			0	By matching	By matching	By matching	By MS/MS	By MS/MS	By MS/MS	0	0	0	3.1
gi|143811464|sp|Q9UMZ2.2|SYNRG_HUMAN	gi|143811464|sp|Q9UMZ2.2|SYNRG_HUMAN	2	2	2	>gi|143811464|sp|Q9UMZ2.2|SYNRG_HUMAN RecName: Full=Synergin gamma; AltName: Full=AP1 subunit gamma-binding protein 1; AltName: Full=Gamma-synergin	1	2	2	2	0	0	0	1	2	1	0	0	0	1	2	1	0	0	0	1	2	1	2.7	2.7	2.7	140.65	1314	1314	3			4		0	By matching	By matching	By matching	By MS/MS	By MS/MS	By matching	0	0	0	1.1
gi|143811467|sp|Q8TC07.2|TBC15_HUMAN	gi|143811467|sp|Q8TC07.2|TBC15_HUMAN	6	6	6	>gi|143811467|sp|Q8TC07.2|TBC15_HUMAN RecName: Full=TBC1 domain family member 15; AltName: Full=GTPase-activating protein RAB7; Short=GAP for RAB7; Short=Rab7-GAP	1	6	6	6	0	0	0	5	5	4	0	0	0	5	5	4	0	0	0	5	5	4	10.3	10.3	10.3	79.49	691	691	2.28		13	5		0	By matching	By matching	By matching	By MS/MS	By MS/MS	By MS/MS	0	0	0	8.5
gi|143811470|sp|Q14679.2|TTLL4_HUMAN	gi|143811470|sp|Q14679.2|TTLL4_HUMAN	1	1	1	>gi|143811470|sp|Q14679.2|TTLL4_HUMAN RecName: Full=Tubulin polyglutamylase TTLL4; AltName: Full=Tubulin--tyrosine ligase-like protein 4	1	1	1	1	0	0	0	1	0	0	0	0	0	1	0	0	0	0	0	1	0	0	1.3	1.3	1.3	133.38	1199	1199	2		1			0.009858	By matching	By matching	By matching	By MS/MS	By matching	By matching	0	0	0	1.3
gi|143811471|sp|P47985.2|UCRI_HUMAN;gi|193806571|sp|P0C7P4.1|UCRIL_HUMAN	gi|143811471|sp|P47985.2|UCRI_HUMAN;gi|193806571|sp|P0C7P4.1|UCRIL_HUMAN	1;1	1;1	1;1	>gi|143811471|sp|P47985.2|UCRI_HUMAN RecName: Full=Cytochrome b-c1 complex subunit Rieske, mitochondrial; AltName: Full=Complex III subunit 5; AltName: Full=Cytochrome b-c1 complex subunit 5; AltName: Full=Rieske iron-sulfur protein; Short=RISP; AltName: F	2	1	1	1	0	0	0	1	1	1	0	0	0	1	1	1	0	0	0	1	1	1	7.7	7.7	7.7	29.668	274	274;283	3.14	2			5	0	By matching	By matching	By matching	By MS/MS	By MS/MS	By MS/MS	0	0	0	7.7
gi|143928063|sp|Q9UQ35.2|SRRM2_HUMAN	gi|143928063|sp|Q9UQ35.2|SRRM2_HUMAN	6	6	6	>gi|143928063|sp|Q9UQ35.2|SRRM2_HUMAN RecName: Full=Serine/arginine repetitive matrix protein 2; AltName: Full=300 kDa nuclear matrix antigen; AltName: Full=Serine/arginine-rich splicing factor-related nuclear matrix protein of 300 kDa; Short=SR-related nu	1	6	6	6	0	1	1	6	6	6	0	1	1	6	6	6	0	1	1	6	6	6	3.3	3.3	3.3	299.61	2752	2752	2.24	1	17	7		0	By matching	By matching	By matching	By MS/MS	By MS/MS	By MS/MS	0	0.7	0.5	3.3
gi|143933639|sp|O43815.4|STRN_HUMAN	gi|143933639|sp|O43815.4|STRN_HUMAN	8	8	8	>gi|143933639|sp|O43815.4|STRN_HUMAN RecName: Full=Striatin	1	8	8	8	0	1	0	4	7	6	0	1	0	4	7	6	0	1	0	4	7	6	17.1	17.1	17.1	86.131	780	780	2.69		9	16	1	0	By matching	By matching	By matching	By MS/MS	By MS/MS	By MS/MS	0	1.7	0	9.2
gi|143955276|sp|Q4LE39.2|ARI4B_HUMAN	gi|143955276|sp|Q4LE39.2|ARI4B_HUMAN	2	2	2	>gi|143955276|sp|Q4LE39.2|ARI4B_HUMAN RecName: Full=AT-rich interactive domain-containing protein 4B; Short=ARID domain-containing protein 4B; AltName: Full=180 kDa Sin3-associated polypeptide; Short=Sin3-associated polypeptide p180; AltName: Full=Breast c	1	2	2	2	0	0	1	1	1	0	0	0	1	1	1	0	0	0	1	1	1	0	2.4	2.4	2.4	147.81	1312	1312	2.2	1	2	2		0	By matching	By matching	By MS/MS	By MS/MS	By MS/MS	By matching	0	0	1.4	1
gi|14424223|sp|O94967.1|WDR47_HUMAN	gi|14424223|sp|O94967.1|WDR47_HUMAN	3	3	3	>gi|14424223|sp|O94967.1|WDR47_HUMAN RecName: Full=WD repeat-containing protein 47; AltName: Full=Neuronal enriched MAP-interacting protein; Short=Nemitin	1	3	3	3	0	0	0	2	2	2	0	0	0	2	2	2	0	0	0	2	2	2	4.8	4.8	4.8	101.95	919	919	3			6		0	By matching	By matching	By matching	By matching	By MS/MS	By MS/MS	0	0	0	2.9
gi|145558852|sp|Q8IUR7.2|ARMC8_HUMAN	gi|145558852|sp|Q8IUR7.2|ARMC8_HUMAN	2	2	2	>gi|145558852|sp|Q8IUR7.2|ARMC8_HUMAN RecName: Full=Armadillo repeat-containing protein 8	1	2	2	2	0	0	0	2	1	2	0	0	0	2	1	2	0	0	0	2	1	2	3.4	3.4	3.4	75.509	673	673	2		5			0	By matching	By matching	By matching	By MS/MS	By MS/MS	By MS/MS	0	0	0	3.4
gi|145558903|sp|Q96EB1.2|ELP4_HUMAN	gi|145558903|sp|Q96EB1.2|ELP4_HUMAN	1	1	1	>gi|145558903|sp|Q96EB1.2|ELP4_HUMAN RecName: Full=Elongator complex protein 4; Short=hELP4; AltName: Full=PAX6 neighbor gene protein	1	1	1	1	0	0	0	0	0	1	0	0	0	0	0	1	0	0	0	0	0	1	5.2	5.2	5.2	46.587	424	424	2.5		1	1		0.0045852	By matching	By matching	By matching	By matching	By matching	By MS/MS	0	0	0	0
gi|145559439|sp|Q8IZ07.3|AN13A_HUMAN	gi|145559439|sp|Q8IZ07.3|AN13A_HUMAN	1	1	1	>gi|145559439|sp|Q8IZ07.3|AN13A_HUMAN RecName: Full=Ankyrin repeat domain-containing protein 13A; AltName: Full=Protein KE03	1	1	1	1	0	0	0	1	1	1	0	0	0	1	1	1	0	0	0	1	1	1	2.2	2.2	2.2	67.618	590	590	2		3			0.0094749	By matching	By matching	By matching	By matching	By MS/MS	By matching	0	0	0	2.2
gi|145559462|sp|O14936.3|CSKP_HUMAN	gi|145559462|sp|O14936.3|CSKP_HUMAN	6	6	6	>gi|145559462|sp|O14936.3|CSKP_HUMAN RecName: Full=Peripheral plasma membrane protein CASK; Short=hCASK; AltName: Full=Calcium/calmodulin-dependent serine protein kinase; AltName: Full=Protein lin-2 homolog	1	6	6	6	0	0	0	4	5	5	0	0	0	4	5	5	0	0	0	4	5	5	10	10	10	105.12	926	926	2.93		1	14		0	By matching	By matching	By matching	By matching	By MS/MS	By MS/MS	0	0	0	6.9
gi|145559484|sp|Q9UPT6.3|JIP3_HUMAN	gi|145559484|sp|Q9UPT6.3|JIP3_HUMAN	2	1	1	>gi|145559484|sp|Q9UPT6.3|JIP3_HUMAN RecName: Full=C-Jun-amino-terminal kinase-interacting protein 3; Short=JIP-3; Short=JNK-interacting protein 3; AltName: Full=JNK MAP kinase scaffold protein 3; AltName: Full=Mitogen-activated protein kinase 8-interactin	1	2	1	1	0	0	0	1	1	2	0	0	0	0	0	1	0	0	0	0	0	1	2	1.3	1.3	147.46	1336	1336	3			1		0.0091161	By matching	By matching	By matching	By matching	By matching	By MS/MS	0	0	0	0.7
gi|145559509|sp|Q8IVD9.3|NUDC3_HUMAN	gi|145559509|sp|Q8IVD9.3|NUDC3_HUMAN	1	1	1	>gi|145559509|sp|Q8IVD9.3|NUDC3_HUMAN RecName: Full=NudC domain-containing protein 3	1	1	1	1	0	0	0	0	1	1	0	0	0	0	1	1	0	0	0	0	1	1	4.2	4.2	4.2	40.822	361	361	4				2	0.0046025	By matching	By matching	By matching	By matching	By MS/MS	By matching	0	0	0	0
gi|145559510|sp|Q14980.2|NUMA1_HUMAN	gi|145559510|sp|Q14980.2|NUMA1_HUMAN	5	5	5	>gi|145559510|sp|Q14980.2|NUMA1_HUMAN RecName: Full=Nuclear mitotic apparatus protein 1; Short=NuMA protein; AltName: Full=Nuclear matrix protein-22; Short=NMP-22; AltName: Full=SP-H antigen	1	5	5	5	0	0	0	2	5	4	0	0	0	2	5	4	0	0	0	2	5	4	3.7	3.7	3.7	238.26	2115	2115	3			11		0	By matching	By matching	By matching	By MS/MS	By MS/MS	By matching	0	0	0	1.3
gi|145559537|sp|O95801.3|TTC4_HUMAN	gi|145559537|sp|O95801.3|TTC4_HUMAN	5	5	5	>gi|145559537|sp|O95801.3|TTC4_HUMAN RecName: Full=Tetratricopeptide repeat protein 4; Short=TPR repeat protein 4	1	5	5	5	1	1	0	5	5	4	1	1	0	5	5	4	1	1	0	5	5	4	13.7	13.7	13.7	44.678	387	387	2.54	3	13	3	7	0	By matching	By matching	By matching	By MS/MS	By MS/MS	By MS/MS	2.6	2.6	0	13.7
gi|146286068|sp|Q8WUY1.2|THEM6_HUMAN	gi|146286068|sp|Q8WUY1.2|THEM6_HUMAN	2	2	2	>gi|146286068|sp|Q8WUY1.2|THEM6_HUMAN RecName: Full=Protein THEM6; AltName: Full=Mesenchymal stem cell protein DSCD75; AltName: Full=Thioesterase superfamily member 6; Flags: Precursor	1	2	2	2	0	0	0	2	1	2	0	0	0	2	1	2	0	0	0	2	1	2	9.6	9.6	9.6	23.865	208	208	1	5				0.0045586	By matching	By matching	By matching	By MS/MS	By matching	By matching	0	0	0	9.6
gi|146289861|sp|P46087.2|NOP2_HUMAN	gi|146289861|sp|P46087.2|NOP2_HUMAN	5	5	5	>gi|146289861|sp|P46087.2|NOP2_HUMAN RecName: Full=Probable 28S rRNA (cytosine(4447)-C(5))-methyltransferase; AltName: Full=Nucleolar protein 1; AltName: Full=Nucleolar protein 2 homolog; AltName: Full=Proliferating-cell nucleolar antigen p120; AltName: Fu	1	5	5	5	2	2	1	2	3	4	2	2	1	2	3	4	2	2	1	2	3	4	9	9	9	89.301	812	812	2.87	1		14		0	By MS/MS	By MS/MS	By matching	By matching	By MS/MS	By MS/MS	3.7	3.6	1.7	3.6
gi|146291106|sp|O95218.2|ZRAB2_HUMAN	gi|146291106|sp|O95218.2|ZRAB2_HUMAN	1	1	1	>gi|146291106|sp|O95218.2|ZRAB2_HUMAN RecName: Full=Zinc finger Ran-binding domain-containing protein 2; AltName: Full=Zinc finger protein 265; AltName: Full=Zinc finger, splicing	1	1	1	1	0	0	0	1	1	1	0	0	0	1	1	1	0	0	0	1	1	1	6.1	6.1	6.1	37.404	330	330	3		2		2	0	By matching	By matching	By matching	By matching	By MS/MS	By MS/MS	0	0	0	6.1
gi|146324905|sp|Q6NVY1.2|HIBCH_HUMAN	gi|146324905|sp|Q6NVY1.2|HIBCH_HUMAN	5	5	5	>gi|146324905|sp|Q6NVY1.2|HIBCH_HUMAN RecName: Full=3-hydroxyisobutyryl-CoA hydrolase, mitochondrial; AltName: Full=3-hydroxyisobutyryl-coenzyme A hydrolase; Short=HIB-CoA hydrolase; Short=HIBYL-CoA-H; Flags: Precursor	1	5	5	5	0	0	1	5	5	4	0	0	1	5	5	4	0	0	1	5	5	4	14.5	14.5	14.5	43.482	386	386	2	1	14	1		0	By matching	By matching	By matching	By MS/MS	By MS/MS	By MS/MS	0	0	2.8	14.5
gi|146325028|sp|Q9ULE6.3|PALD_HUMAN	gi|146325028|sp|Q9ULE6.3|PALD_HUMAN	2	2	2	>gi|146325028|sp|Q9ULE6.3|PALD_HUMAN RecName: Full=Paladin	1	2	2	2	0	0	0	1	1	2	0	0	0	1	1	2	0	0	0	1	1	2	3.5	3.5	3.5	96.753	856	856	2.4		3	2		0	By matching	By matching	By matching	By matching	By matching	By MS/MS	0	0	0	1.4
gi|146329988|sp|Q9Y6D5.3|BIG2_HUMAN	gi|146329988|sp|Q9Y6D5.3|BIG2_HUMAN	3	2	2	>gi|146329988|sp|Q9Y6D5.3|BIG2_HUMAN RecName: Full=Brefeldin A-inhibited guanine nucleotide-exchange protein 2; Short=Brefeldin A-inhibited GEP 2; AltName: Full=ADP-ribosylation factor guanine nucleotide-exchange factor 2	1	3	2	2	0	0	1	1	2	2	0	0	1	0	1	1	0	0	1	0	1	1	2.2	1.6	1.6	202.04	1785	1785	2.33	1		2		1	By matching	By matching	By MS/MS	By matching	By matching	By MS/MS	0	0	1	0.7
gi|146331047|sp|Q9NZT2.3|OGFR_HUMAN	gi|146331047|sp|Q9NZT2.3|OGFR_HUMAN	10	10	10	>gi|146331047|sp|Q9NZT2.3|OGFR_HUMAN RecName: Full=Opioid growth factor receptor; Short=OGFr; AltName: Full=Protein 7-60; AltName: Full=Zeta-type opioid receptor	1	10	10	10	0	0	0	8	9	9	0	0	0	8	9	9	0	0	0	8	9	9	25.7	25.7	25.7	73.324	677	677	2.06		33	2		0	By matching	By matching	By matching	By MS/MS	By MS/MS	By MS/MS	0	0	0	21.4
gi|146345366|sp|O43747.5|AP1G1_HUMAN	gi|146345366|sp|O43747.5|AP1G1_HUMAN	4	4	4	>gi|146345366|sp|O43747.5|AP1G1_HUMAN RecName: Full=AP-1 complex subunit gamma-1; AltName: Full=Adaptor protein complex AP-1 subunit gamma-1; AltName: Full=Adaptor-related protein complex 1 subunit gamma-1; AltName: Full=Clathrin assembly protein complex 1	1	4	4	4	0	0	0	2	3	3	0	0	0	2	3	3	0	0	0	2	3	3	7.8	7.8	7.8	91.35	822	822	2.18		9	2		0	By matching	By matching	By matching	By MS/MS	By MS/MS	By MS/MS	0	0	0	3.3
gi|146345439|sp|O43837.2|IDH3B_HUMAN	gi|146345439|sp|O43837.2|IDH3B_HUMAN	5	5	5	>gi|146345439|sp|O43837.2|IDH3B_HUMAN RecName: Full=Isocitrate dehydrogenase [NAD] subunit beta, mitochondrial; AltName: Full=Isocitric dehydrogenase subunit beta; AltName: Full=NAD(+)-specific ICDH subunit beta; Flags: Precursor	1	5	5	5	0	1	1	3	5	4	0	1	1	3	5	4	0	1	1	3	5	4	15.1	15.1	15.1	42.183	385	385	1.88	2	15			0	By matching	By matching	By matching	By MS/MS	By MS/MS	By MS/MS	0	3.4	3.4	12.5
gi|147643203|sp|Q96TC7.2|RMD3_HUMAN	gi|147643203|sp|Q96TC7.2|RMD3_HUMAN	6	6	6	>gi|147643203|sp|Q96TC7.2|RMD3_HUMAN RecName: Full=Regulator of microtubule dynamics protein 3; Short=RMD-3; Short=hRMD-3; AltName: Full=Cerebral protein 10; AltName: Full=Protein FAM82A2; AltName: Full=Protein FAM82C; AltName: Full=Protein tyrosine phosph	1	6	6	6	1	0	0	2	6	3	1	0	0	2	6	3	1	0	0	2	6	3	18.9	18.9	18.9	52.118	470	470	2.5	1	10	7	2	0	By matching	By matching	By matching	By MS/MS	By MS/MS	By MS/MS	2.3	0	0	4.5
gi|147644956|sp|Q3V6T2.2|GRDN_HUMAN	gi|147644956|sp|Q3V6T2.2|GRDN_HUMAN	1	1	1	>gi|147644956|sp|Q3V6T2.2|GRDN_HUMAN RecName: Full=Girdin; AltName: Full=Akt phosphorylation enhancer; Short=APE; AltName: Full=Coiled-coil domain-containing protein 88A; AltName: Full=G alpha-interacting vesicle-associated protein; Short=GIV; AltName: Ful	1	1	1	1	0	0	0	1	1	1	0	0	0	1	1	1	0	0	0	1	1	1	0.7	0.7	0.7	216.04	1871	1871	4				3	1	By matching	By matching	By matching	By matching	By matching	By MS/MS	0	0	0	0.7
gi|147647143|sp|Q8TCG1.2|CIP2A_HUMAN	gi|147647143|sp|Q8TCG1.2|CIP2A_HUMAN	3	3	3	>gi|147647143|sp|Q8TCG1.2|CIP2A_HUMAN RecName: Full=Protein CIP2A; AltName: Full=Cancerous inhibitor of PP2A; AltName: Full=p90 autoantigen	1	3	3	3	0	0	0	2	3	3	0	0	0	2	3	3	0	0	0	2	3	3	3.2	3.2	3.2	102.18	905	905	2.89		1	8		0	By matching	By matching	By matching	By matching	By matching	By MS/MS	0	0	0	2.1
gi|147668553|sp|O15042.2|SR140_HUMAN	gi|147668553|sp|O15042.2|SR140_HUMAN	2	2	2	>gi|147668553|sp|O15042.2|SR140_HUMAN RecName: Full=U2 snRNP-associated SURP motif-containing protein; AltName: Full=140 kDa Ser/Arg-rich domain protein; AltName: Full=U2-associated protein SR140	1	2	2	2	0	0	0	2	0	1	0	0	0	2	0	1	0	0	0	2	0	1	2.5	2.5	2.5	118.29	1029	1029	3			3		0.00045005	By matching	By matching	By matching	By MS/MS	By matching	By MS/MS	0	0	0	2.5
gi|147733168|sp|Q8TEV9.2|SMCR8_HUMAN	gi|147733168|sp|Q8TEV9.2|SMCR8_HUMAN	4	4	4	>gi|147733168|sp|Q8TEV9.2|SMCR8_HUMAN RecName: Full=Smith-Magenis syndrome chromosomal region candidate gene 8 protein	1	4	4	4	0	0	0	3	4	3	0	0	0	3	4	3	0	0	0	3	4	3	5.4	5.4	5.4	105.02	937	937	3			10		0	By matching	By matching	By matching	By MS/MS	By MS/MS	By MS/MS	0	0	0	4.1
gi|147742890|sp|Q9Y4B6.3|VPRBP_HUMAN	gi|147742890|sp|Q9Y4B6.3|VPRBP_HUMAN	3	3	3	>gi|147742890|sp|Q9Y4B6.3|VPRBP_HUMAN RecName: Full=Protein VPRBP; AltName: Full=DDB1- and CUL4-associated factor 1; AltName: Full=HIV-1 Vpr-binding protein; Short=VprBP; AltName: Full=Serine/threonine-protein kinase VPRBP; AltName: Full=Vpr-interacting pr	1	3	3	3	0	0	0	3	1	1	0	0	0	3	1	1	0	0	0	3	1	1	3.5	3.5	3.5	169.01	1507	1507	3			5		0	By matching	By matching	By matching	By MS/MS	By MS/MS	By MS/MS	0	0	0	3.5
gi|147742983|sp|Q8NHH9.2|ATLA2_HUMAN	gi|147742983|sp|Q8NHH9.2|ATLA2_HUMAN	2	2	2	>gi|147742983|sp|Q8NHH9.2|ATLA2_HUMAN RecName: Full=Atlastin-2; AltName: Full=ADP-ribosylation factor-like protein 6-interacting protein 2; Short=ARL-6-interacting protein 2; Short=Aip-2	1	2	2	2	0	0	0	1	1	1	0	0	0	1	1	1	0	0	0	1	1	1	4.8	4.8	4.8	66.228	583	583	2		3			0	By matching	By matching	By matching	By MS/MS	By MS/MS	By MS/MS	0	0	0	3.3
gi|148841515|sp|Q9C0B1.3|FTO_HUMAN	gi|148841515|sp|Q9C0B1.3|FTO_HUMAN	7	7	7	>gi|148841515|sp|Q9C0B1.3|FTO_HUMAN RecName: Full=Alpha-ketoglutarate-dependent dioxygenase FTO; AltName: Full=Fat mass and obesity-associated protein	1	7	7	7	1	1	0	6	7	6	1	1	0	6	7	6	1	1	0	6	7	6	19.4	19.4	19.4	58.281	505	505	2.19	1	23		3	0	By matching	By matching	By matching	By MS/MS	By MS/MS	By MS/MS	3.2	2.2	0	16.4
gi|148876773|sp|Q14126.2|DSG2_HUMAN	gi|148876773|sp|Q14126.2|DSG2_HUMAN	3	3	3	>gi|148876773|sp|Q14126.2|DSG2_HUMAN RecName: Full=Desmoglein-2; AltName: Full=Cadherin family member 5; AltName: Full=HDGC; Flags: Precursor	1	3	3	3	0	0	0	3	3	3	0	0	0	3	3	3	0	0	0	3	3	3	3.8	3.8	3.8	122.29	1118	1118	2.75		3	9		0	By matching	By matching	By matching	By MS/MS	By MS/MS	By MS/MS	0	0	0	3.8
gi|148887180|sp|Q08J23.2|NSUN2_HUMAN	gi|148887180|sp|Q08J23.2|NSUN2_HUMAN	10	10	10	>gi|148887180|sp|Q08J23.2|NSUN2_HUMAN RecName: Full=tRNA (cytosine(34)-C(5))-methyltransferase; AltName: Full=Myc-induced SUN domain-containing protein; Short=Misu; AltName: Full=NOL1/NOP2/Sun domain family member 2; AltName: Full=Substrate of AIM1/Aurora	1	10	10	10	1	3	1	9	10	9	1	3	1	9	10	9	1	3	1	9	10	9	16.4	16.4	16.4	86.47	767	767	2.42	1	37	29		0	By matching	By matching	By matching	By MS/MS	By MS/MS	By MS/MS	1.3	7.3	2.6	15.1
gi|148887414|sp|P27635.4|RL10_HUMAN	gi|148887414|sp|P27635.4|RL10_HUMAN	3	3	3	>gi|148887414|sp|P27635.4|RL10_HUMAN RecName: Full=60S ribosomal protein L10; AltName: Full=Laminin receptor homolog; AltName: Full=Protein QM; AltName: Full=Tumor suppressor QM	1	3	3	3	2	2	2	3	2	2	2	2	2	3	2	2	2	2	2	3	2	2	19.2	19.2	19.2	24.604	214	214	4				19	0	By matching	By matching	By matching	By MS/MS	By MS/MS	By MS/MS	6.5	6.5	6.5	19.2
gi|14916543|sp|O60716.1|CTND1_HUMAN	gi|14916543|sp|O60716.1|CTND1_HUMAN	4	4	4	>gi|14916543|sp|O60716.1|CTND1_HUMAN RecName: Full=Catenin delta-1; AltName: Full=Cadherin-associated Src substrate; Short=CAS; AltName: Full=p120 catenin; Short=p120(ctn); AltName: Full=p120(cas)	1	4	4	4	0	0	3	4	4	3	0	0	3	4	4	3	0	0	3	4	4	3	6	6	6	108.17	968	968	2.53	3	4	11	1	0	By matching	By matching	By MS/MS	By MS/MS	By MS/MS	By MS/MS	0	0	4.9	6
gi|14916548|sp|O60884.1|DNJA2_HUMAN	gi|14916548|sp|O60884.1|DNJA2_HUMAN	6	6	6	>gi|14916548|sp|O60884.1|DNJA2_HUMAN RecName: Full=DnaJ homolog subfamily A member 2; AltName: Full=Cell cycle progression restoration gene 3 protein; AltName: Full=Dnj3; Short=Dj3; AltName: Full=HIRA-interacting protein 4; AltName: Full=Renal carcinoma an	1	6	6	6	0	0	0	5	2	5	0	0	0	5	2	5	0	0	0	5	2	5	24.8	24.8	24.8	45.745	412	412	2.67		8		4	0	By matching	By matching	By matching	By MS/MS	By MS/MS	By MS/MS	0	0	0	24.8
gi|14916572|sp|Q13283.1|G3BP1_HUMAN	gi|14916572|sp|Q13283.1|G3BP1_HUMAN	5	5	4	>gi|14916572|sp|Q13283.1|G3BP1_HUMAN RecName: Full=Ras GTPase-activating protein-binding protein 1; Short=G3BP-1; AltName: Full=ATP-dependent DNA helicase VIII; Short=hDH VIII; AltName: Full=GAP SH3 domain-binding protein 1	1	5	5	4	0	1	1	5	5	4	0	1	1	5	5	4	0	1	1	4	4	3	18.5	18.5	15.9	52.164	466	466	2		18			0	By matching	By matching	By matching	By MS/MS	By MS/MS	By MS/MS	0	3.4	3.9	18.5
gi|14916956|sp|O76031.2|CLPX_HUMAN	gi|14916956|sp|O76031.2|CLPX_HUMAN	5	5	5	>gi|14916956|sp|O76031.2|CLPX_HUMAN RecName: Full=ATP-dependent Clp protease ATP-binding subunit clpX-like, mitochondrial; Flags: Precursor	1	5	5	5	0	1	0	5	5	4	0	1	0	5	5	4	0	1	0	5	5	4	9.2	9.2	9.2	69.223	633	633	2		15			0	By matching	By matching	By matching	By MS/MS	By MS/MS	By MS/MS	0	1.7	0	9.2
gi|14916998|sp|P00390.2|GSHR_HUMAN	gi|14916998|sp|P00390.2|GSHR_HUMAN	14	14	14	>gi|14916998|sp|P00390.2|GSHR_HUMAN RecName: Full=Glutathione reductase, mitochondrial; Short=GR; Short=GRase; Flags: Precursor	1	14	14	14	3	3	4	14	14	14	3	3	4	14	14	14	3	3	4	14	14	14	51.9	51.9	51.9	56.256	522	522	3.65	1	11	8	73	0	By MS/MS	By MS/MS	By matching	By MS/MS	By MS/MS	By MS/MS	7.9	9.6	11.9	51.9
gi|14916999|sp|P11021.2|GRP78_HUMAN	gi|14916999|sp|P11021.2|GRP78_HUMAN	31	31	30	>gi|14916999|sp|P11021.2|GRP78_HUMAN RecName: Full=78 kDa glucose-regulated protein; Short=GRP-78; AltName: Full=Endoplasmic reticulum lumenal Ca(2+)-binding protein grp78; AltName: Full=Heat shock 70 kDa protein 5; AltName: Full=Immunoglobulin heavy chain	1	31	31	30	14	18	12	31	29	31	14	18	12	31	29	31	13	17	12	30	28	30	48.3	48.3	48.3	72.332	654	654	2.2	5	191	49	3	0	By MS/MS	By MS/MS	By MS/MS	By MS/MS	By MS/MS	By MS/MS	26.8	32.3	25.8	48.3
gi|14917099|sp|Q93034.4|CUL5_HUMAN	gi|14917099|sp|Q93034.4|CUL5_HUMAN	2	2	2	>gi|14917099|sp|Q93034.4|CUL5_HUMAN RecName: Full=Cullin-5; Short=CUL-5; AltName: Full=Vasopressin-activated calcium-mobilizing receptor 1; Short=VACM-1	1	2	2	2	0	0	1	2	2	0	0	0	1	2	2	0	0	0	1	2	2	0	2.2	2.2	2.2	90.954	780	780	2		5			0.0076861	By matching	By matching	By matching	By MS/MS	By MS/MS	By matching	0	0	1.3	2.2
gi|150417955|sp|Q96HS1.2|PGAM5_HUMAN	gi|150417955|sp|Q96HS1.2|PGAM5_HUMAN	6	6	6	>gi|150417955|sp|Q96HS1.2|PGAM5_HUMAN RecName: Full=Serine/threonine-protein phosphatase PGAM5, mitochondrial; AltName: Full=Bcl-XL-binding protein v68; AltName: Full=Phosphoglycerate mutase family member 5	1	6	6	6	1	2	1	6	6	6	1	2	1	6	6	6	1	2	1	6	6	6	18.3	18.3	18.3	32.004	289	289	1.23	22	2	2		0	By matching	By matching	By matching	By MS/MS	By MS/MS	By MS/MS	3.1	7.3	3.1	18.3
gi|150421597|sp|Q96T76.2|MMS19_HUMAN	gi|150421597|sp|Q96T76.2|MMS19_HUMAN	9	9	9	>gi|150421597|sp|Q96T76.2|MMS19_HUMAN RecName: Full=MMS19 nucleotide excision repair protein homolog; Short=hMMS19; AltName: Full=MET18 homolog; AltName: Full=MMS19-like protein	1	9	9	9	0	0	0	8	8	7	0	0	0	8	8	7	0	0	0	8	8	7	14.4	14.4	14.4	113.29	1030	1030	2.91		3	29		0	By matching	By matching	By matching	By MS/MS	By MS/MS	By MS/MS	0	0	0	12.6
gi|150438841|sp|Q8NCW5.2|NNRE_HUMAN	gi|150438841|sp|Q8NCW5.2|NNRE_HUMAN	3	3	3	>gi|150438841|sp|Q8NCW5.2|NNRE_HUMAN RecName: Full=NAD(P)H-hydrate epimerase; AltName: Full=Apolipoprotein A-I-binding protein; Short=AI-BP; AltName: Full=NAD(P)HX epimerase; AltName: Full=YjeF N-terminal domain-containing protein 1; Short=YjeF_N1; Flags:	1	3	3	3	0	0	0	3	3	3	0	0	0	3	3	3	0	0	0	3	3	3	17	17	17	31.674	288	288	4				9	0	By matching	By matching	By matching	By MS/MS	By MS/MS	By MS/MS	0	0	0	17
gi|152031612|sp|Q9UJ14.2|GGT7_HUMAN	gi|152031612|sp|Q9UJ14.2|GGT7_HUMAN	1	1	1	>gi|152031612|sp|Q9UJ14.2|GGT7_HUMAN RecName: Full=Gamma-glutamyltransferase 7; Short=GGT 7; AltName: Full=Gamma-glutamyltransferase-like 3; AltName: Full=Gamma-glutamyltransferase-like 5; AltName: Full=Gamma-glutamyltranspeptidase 7; AltName: Full=Glutath	1	1	1	1	0	0	0	1	1	0	0	0	0	1	1	0	0	0	0	1	1	0	2.6	2.6	2.6	70.466	662	662	2		2			1	By matching	By matching	By matching	By MS/MS	By matching	By matching	0	0	0	2.6
gi|152031617|sp|O00178.3|GTPB1_HUMAN	gi|152031617|sp|O00178.3|GTPB1_HUMAN	5	5	5	>gi|152031617|sp|O00178.3|GTPB1_HUMAN RecName: Full=GTP-binding protein 1; Short=G-protein 1; Short=GP-1; Short=GP1	1	5	5	5	0	0	1	4	4	3	0	0	1	4	4	3	0	0	1	4	4	3	13.8	13.8	13.8	72.453	669	669	2.27		12	2	1	0	By matching	By matching	By matching	By MS/MS	By MS/MS	By MS/MS	0	0	2.4	12.4
gi|152031693|sp|Q9NRL3.2|STRN4_HUMAN	gi|152031693|sp|Q9NRL3.2|STRN4_HUMAN	4	4	4	>gi|152031693|sp|Q9NRL3.2|STRN4_HUMAN RecName: Full=Striatin-4; AltName: Full=Zinedin	1	4	4	4	0	0	0	4	4	4	0	0	0	4	4	4	0	0	0	4	4	4	7.8	7.8	7.8	80.595	753	753	2.43		13	10		0	By matching	By matching	By matching	By MS/MS	By MS/MS	By MS/MS	0	0	0	7.8
gi|152031695|sp|P51687.2|SUOX_HUMAN	gi|152031695|sp|P51687.2|SUOX_HUMAN	1	1	1	>gi|152031695|sp|P51687.2|SUOX_HUMAN RecName: Full=Sulfite oxidase, mitochondrial; Flags: Precursor	1	1	1	1	0	0	0	0	1	0	0	0	0	0	1	0	0	0	0	0	1	0	2.4	2.4	2.4	60.282	545	545	2		1			0.00044366	By matching	By matching	By matching	By matching	By MS/MS	By matching	0	0	0	0
gi|152031724|sp|O94966.2|UBP19_HUMAN	gi|152031724|sp|O94966.2|UBP19_HUMAN	8	8	8	>gi|152031724|sp|O94966.2|UBP19_HUMAN RecName: Full=Ubiquitin carboxyl-terminal hydrolase 19; AltName: Full=Deubiquitinating enzyme 19; AltName: Full=Ubiquitin thioesterase 19; AltName: Full=Ubiquitin-specific-processing protease 19; AltName: Full=Zinc fin	1	8	8	8	1	1	0	8	7	8	1	1	0	8	7	8	1	1	0	8	7	8	9.6	9.6	9.6	145.65	1318	1318	3			25		0	By matching	By matching	By matching	By MS/MS	By MS/MS	By MS/MS	0.9	0.9	0	9.6
gi|152083350|sp|Q9BZE1.2|RM37_HUMAN	gi|152083350|sp|Q9BZE1.2|RM37_HUMAN	1	1	1	>gi|152083350|sp|Q9BZE1.2|RM37_HUMAN RecName: Full=39S ribosomal protein L37, mitochondrial; Short=L37mt; Short=MRP-L37; AltName: Full=39S ribosomal protein L2, mitochondrial; Short=L2mt; Short=MRP-L2; Flags: Precursor	1	1	1	1	0	0	0	1	1	1	0	0	0	1	1	1	0	0	0	1	1	1	3.8	3.8	3.8	48.117	423	423	2		3			0	By matching	By matching	By matching	By MS/MS	By matching	By MS/MS	0	0	0	3.8
gi|152112287|sp|O94979.3|SC31A_HUMAN	gi|152112287|sp|O94979.3|SC31A_HUMAN	11	11	11	>gi|152112287|sp|O94979.3|SC31A_HUMAN RecName: Full=Protein transport protein Sec31A; AltName: Full=ABP125; AltName: Full=ABP130; AltName: Full=SEC31-like protein 1; AltName: Full=SEC31-related protein A; AltName: Full=Web1-like protein	1	11	11	11	0	1	0	9	10	8	0	1	0	9	10	8	0	1	0	9	10	8	13.5	13.5	13.5	133.01	1220	1220	2.93		2	28		0	By matching	By matching	By matching	By MS/MS	By MS/MS	By MS/MS	0	1.6	0	10.7
gi|152125805|sp|Q96CB9.2|NSUN4_HUMAN	gi|152125805|sp|Q96CB9.2|NSUN4_HUMAN	1	1	1	>gi|152125805|sp|Q96CB9.2|NSUN4_HUMAN RecName: Full=5-methylcytosine rRNA methyltransferase NSUN4; AltName: Full=NOL1/NOP2/Sun domain family member 4; Flags: Precursor	1	1	1	1	1	1	1	1	1	1	1	1	1	1	1	1	1	1	1	1	1	1	2.9	2.9	2.9	43.088	384	384	2.29		5	2		0	By matching	By matching	By matching	By MS/MS	By MS/MS	By matching	2.9	2.9	2.9	2.9
gi|15213949|sp|Q9UFF9.1|CNOT8_HUMAN	gi|15213949|sp|Q9UFF9.1|CNOT8_HUMAN	1	1	1	>gi|15213949|sp|Q9UFF9.1|CNOT8_HUMAN RecName: Full=CCR4-NOT transcription complex subunit 8; AltName: Full=CAF1-like protein; Short=CALIFp; AltName: Full=CAF2; AltName: Full=CCR4-associated factor 8; AltName: Full=Caf1b	1	1	1	1	0	0	0	1	0	0	0	0	0	1	0	0	0	0	0	1	0	0	4.8	4.8	4.8	33.54	292	292	1	1				0.0083499	By matching	By matching	By matching	By MS/MS	By matching	By matching	0	0	0	4.8
gi|156630863|sp|Q4G0N4.2|NAKD2_HUMAN	gi|156630863|sp|Q4G0N4.2|NAKD2_HUMAN	5	5	5	>gi|156630863|sp|Q4G0N4.2|NAKD2_HUMAN RecName: Full=NAD kinase 2, mitochondrial; AltName: Full=Mitochondrial NAD kinase; AltName: Full=NAD kinase domain-containing protein 1, mitochondrial; Flags: Precursor	1	5	5	5	0	0	0	5	5	4	0	0	0	5	5	4	0	0	0	5	5	4	16.5	16.5	16.5	49.432	442	442	2.12		14	2		0	By matching	By matching	By matching	By MS/MS	By MS/MS	By MS/MS	0	0	0	16.5
gi|156630892|sp|P55268.2|LAMB2_HUMAN	gi|156630892|sp|P55268.2|LAMB2_HUMAN	2	2	2	>gi|156630892|sp|P55268.2|LAMB2_HUMAN RecName: Full=Laminin subunit beta-2; AltName: Full=Laminin B1s chain; AltName: Full=Laminin-11 subunit beta; AltName: Full=Laminin-14 subunit beta; AltName: Full=Laminin-15 subunit beta; AltName: Full=Laminin-3 subuni	1	2	2	2	0	0	0	2	2	1	0	0	0	2	2	1	0	0	0	2	2	1	1.8	1.8	1.8	195.98	1798	1798	2.83		1	5		0	By matching	By matching	By matching	By MS/MS	By MS/MS	By matching	0	0	0	1.8
gi|156631024|sp|Q7Z2Z1.2|TICRR_HUMAN	gi|156631024|sp|Q7Z2Z1.2|TICRR_HUMAN	1	1	1	>gi|156631024|sp|Q7Z2Z1.2|TICRR_HUMAN RecName: Full=Treslin; AltName: Full=TopBP1-interacting checkpoint and replication regulator; AltName: Full=TopBP1-interacting, replication-stimulating protein	1	1	1	1	0	0	1	0	0	0	0	0	1	0	0	0	0	0	1	0	0	0	0.9	0.9	0.9	210.85	1910	1910	1	1				0.0057448	By matching	By matching	By MS/MS	By matching	By matching	By matching	0	0	0.9	0
gi|156632706|sp|P42704.3|LPPRC_HUMAN	gi|156632706|sp|P42704.3|LPPRC_HUMAN	51	51	51	>gi|156632706|sp|P42704.3|LPPRC_HUMAN RecName: Full=Leucine-rich PPR motif-containing protein, mitochondrial; AltName: Full=130 kDa leucine-rich protein; Short=LRP 130; AltName: Full=GP130; Flags: Precursor	1	51	51	51	7	10	6	46	50	47	7	10	6	46	50	47	7	10	6	46	50	47	47.8	47.8	47.8	157.9	1394	1394	2.97		7	209	1	0	By MS/MS	By MS/MS	By MS/MS	By MS/MS	By MS/MS	By MS/MS	6.2	8.8	5.7	42.8
gi|156633605|sp|Q9Y3P9.3|RBGP1_HUMAN	gi|156633605|sp|Q9Y3P9.3|RBGP1_HUMAN	14	14	12	>gi|156633605|sp|Q9Y3P9.3|RBGP1_HUMAN RecName: Full=Rab GTPase-activating protein 1; AltName: Full=GAP and centrosome-associated protein; AltName: Full=Rab6 GTPase-activating protein GAPCenA	1	14	14	12	0	0	0	14	13	12	0	0	0	14	13	12	0	0	0	12	11	10	17.9	17.9	15.4	121.74	1069	1069	3			46		0	By matching	By matching	By matching	By MS/MS	By MS/MS	By MS/MS	0	0	0	17.9
gi|156633611|sp|Q0VAM2.2|RGF1B_HUMAN	gi|156633611|sp|Q0VAM2.2|RGF1B_HUMAN	1	1	1	>gi|156633611|sp|Q0VAM2.2|RGF1B_HUMAN RecName: Full=Ras-GEF domain-containing family member 1B; AltName: Full=GPI gamma-4	1	1	1	1	1	1	1	1	0	1	1	1	1	1	0	1	1	1	1	1	0	1	2.3	2.3	2.3	55.359	473	473	1	5				1	By MS/MS	By matching	By matching	By matching	By matching	By matching	2.3	2.3	2.3	2.3
gi|156637353|sp|P49247.3|RPIA_HUMAN	gi|156637353|sp|P49247.3|RPIA_HUMAN	4	4	4	>gi|156637353|sp|P49247.3|RPIA_HUMAN RecName: Full=Ribose-5-phosphate isomerase; AltName: Full=Phosphoriboisomerase	1	4	4	4	0	0	0	3	2	3	0	0	0	3	2	3	0	0	0	3	2	3	20.6	20.6	20.6	33.269	311	311	1.88	11	1	1	4	0	By matching	By matching	By matching	By MS/MS	By MS/MS	By MS/MS	0	0	0	15.4
gi|158517847|sp|P08603.4|CFAH_HUMAN	gi|158517847|sp|P08603.4|CFAH_HUMAN	9	9	8	>gi|158517847|sp|P08603.4|CFAH_HUMAN RecName: Full=Complement factor H; AltName: Full=H factor 1; Flags: Precursor	1	9	9	8	0	0	9	1	2	1	0	0	9	1	2	1	0	0	8	1	2	1	11	11	10.1	139.09	1231	1231	1.4	10	4	1		0	By matching	By matching	By MS/MS	By matching	By matching	By matching	0	0	11	1.1
gi|158518391|sp|P45880.2|VDAC2_HUMAN	gi|158518391|sp|P45880.2|VDAC2_HUMAN	8	8	8	>gi|158518391|sp|P45880.2|VDAC2_HUMAN RecName: Full=Voltage-dependent anion-selective channel protein 2; Short=VDAC-2; Short=hVDAC2; AltName: Full=Outer mitochondrial membrane protein porin 2	1	8	8	8	0	0	3	8	8	8	0	0	3	8	8	8	0	0	3	8	8	8	31	31	31	31.566	294	294	1.83	32	10	10	6	0	By matching	By matching	By MS/MS	By MS/MS	By MS/MS	By MS/MS	0	0	17.3	31
gi|158518649|sp|Q8N3C0.3|ASCC3_HUMAN	gi|158518649|sp|Q8N3C0.3|ASCC3_HUMAN	2	2	2	>gi|158518649|sp|Q8N3C0.3|ASCC3_HUMAN RecName: Full=Activating signal cointegrator 1 complex subunit 3; AltName: Full=ASC-1 complex subunit p200; Short=ASC1p200; AltName: Full=Helicase, ATP binding 1; AltName: Full=Trip4 complex subunit p200	1	2	2	2	1	0	1	1	1	2	1	0	1	1	1	2	1	0	1	1	1	2	1.1	1.1	1.1	251.46	2202	2202	2.57	1	1	5		0.0017123	By matching	By matching	By matching	By MS/MS	By MS/MS	By MS/MS	0.5	0	0.5	0.5
gi|158520000|sp|Q9NSV4.4|DIAP3_HUMAN	gi|158520000|sp|Q9NSV4.4|DIAP3_HUMAN	6	6	6	>gi|158520000|sp|Q9NSV4.4|DIAP3_HUMAN RecName: Full=Protein diaphanous homolog 3; AltName: Full=Diaphanous-related formin-3; Short=DRF3; AltName: Full=MDia2	1	6	6	6	0	0	0	6	5	5	0	0	0	6	5	5	0	0	0	6	5	5	6.2	6.2	6.2	136.92	1193	1193	3			16		0	By matching	By matching	By matching	By MS/MS	By MS/MS	By MS/MS	0	0	0	6.2
gi|158523286|sp|Q99729.2|ROAA_HUMAN	gi|158523286|sp|Q99729.2|ROAA_HUMAN	3	3	3	>gi|158523286|sp|Q99729.2|ROAA_HUMAN RecName: Full=Heterogeneous nuclear ribonucleoprotein A/B; Short=hnRNP A/B; AltName: Full=APOBEC1-binding protein 1; Short=ABBP-1	1	3	3	3	1	3	1	2	2	2	1	3	1	2	2	2	1	3	1	2	2	2	11.4	11.4	11.4	36.224	332	332	2.08	4	6	1	2	0	By matching	By MS/MS	By MS/MS	By MS/MS	By MS/MS	By matching	5.1	11.4	3.9	7.5
gi|158523294|sp|Q9NZB2.2|F120A_HUMAN;gi|74744234|sp|Q5T035.1|CI129_HUMAN	gi|158523294|sp|Q9NZB2.2|F120A_HUMAN	6;1	6;1	6;1	>gi|158523294|sp|Q9NZB2.2|F120A_HUMAN RecName: Full=Constitutive coactivator of PPAR-gamma-like protein 1; AltName: Full=Oxidative stress-associated Src activator; AltName: Full=Protein FAM120A	2	6	6	6	0	0	0	4	4	3	0	0	0	4	4	3	0	0	0	4	4	3	7.4	7.4	7.4	121.89	1118	1118;196	3			11		0	By matching	By matching	By matching	By MS/MS	By MS/MS	By MS/MS	0	0	0	4.7
gi|158563913|sp|Q5T1M5.2|FKB15_HUMAN	gi|158563913|sp|Q5T1M5.2|FKB15_HUMAN	5	5	5	>gi|158563913|sp|Q5T1M5.2|FKB15_HUMAN RecName: Full=FK506-binding protein 15; Short=FKBP-15; AltName: Full=133 kDa FK506-binding protein; Short=133 kDa FKBP; Short=FKBP-133; AltName: Full=WASP and FKBP-like; Short=WAFL	1	5	5	5	2	1	0	3	4	4	2	1	0	3	4	4	2	1	0	3	4	4	6.2	6.2	6.2	133.63	1219	1219	3			14		0	By matching	By MS/MS	By matching	By MS/MS	By MS/MS	By MS/MS	2.1	1.1	0	4
gi|158563965|sp|Q6P1L5.2|F117B_HUMAN	gi|158563965|sp|Q6P1L5.2|F117B_HUMAN	1	1	1	>gi|158563965|sp|Q6P1L5.2|F117B_HUMAN RecName: Full=Protein FAM117B; AltName: Full=Amyotrophic lateral sclerosis 2 chromosomal region candidate gene 13 protein	1	1	1	1	0	0	0	0	1	1	0	0	0	0	1	1	0	0	0	0	1	1	2.9	2.9	2.9	61.967	589	589	2		2			0.00044583	By matching	By matching	By matching	By matching	By MS/MS	By matching	0	0	0	0
gi|158564023|sp|Q9H6T3.2|RPAP3_HUMAN	gi|158564023|sp|Q9H6T3.2|RPAP3_HUMAN	3	3	3	>gi|158564023|sp|Q9H6T3.2|RPAP3_HUMAN RecName: Full=RNA polymerase II-associated protein 3	1	3	3	3	0	0	0	3	0	3	0	0	0	3	0	3	0	0	0	3	0	3	7.1	7.1	7.1	75.718	665	665	2.14		6	1		0	By matching	By matching	By matching	By MS/MS	By matching	By MS/MS	0	0	0	7.1
gi|158564082|sp|Q9NY27.3|PP4R2_HUMAN	gi|158564082|sp|Q9NY27.3|PP4R2_HUMAN	2	2	2	>gi|158564082|sp|Q9NY27.3|PP4R2_HUMAN RecName: Full=Serine/threonine-protein phosphatase 4 regulatory subunit 2	1	2	2	2	0	0	0	1	1	2	0	0	0	1	1	2	0	0	0	1	1	2	6.7	6.7	6.7	46.898	417	417	2		4			0	By matching	By matching	By matching	By MS/MS	By matching	By MS/MS	0	0	0	3.4
gi|158931120|sp|Q53GQ0.2|DHB12_HUMAN	gi|158931120|sp|Q53GQ0.2|DHB12_HUMAN	6	6	6	>gi|158931120|sp|Q53GQ0.2|DHB12_HUMAN RecName: Full=Very-long-chain 3-oxoacyl-CoA reductase; AltName: Full=17-beta-hydroxysteroid dehydrogenase 12; Short=17-beta-HSD 12; AltName: Full=3-ketoacyl-CoA reductase; Short=KAR; AltName: Full=Estradiol 17-beta-deh	1	6	6	6	0	0	0	6	5	6	0	0	0	6	5	6	0	0	0	6	5	6	25	25	25	34.324	312	312	1.16	17	1	1		0	By matching	By matching	By matching	By MS/MS	By MS/MS	By MS/MS	0	0	0	25
gi|158931124|sp|Q8NFC6.2|BD1L1_HUMAN	gi|158931124|sp|Q8NFC6.2|BD1L1_HUMAN	30	30	30	>gi|158931124|sp|Q8NFC6.2|BD1L1_HUMAN RecName: Full=Biorientation of chromosomes in cell division protein 1-like 1	1	30	30	30	1	2	0	28	28	25	1	2	0	28	28	25	1	2	0	28	28	25	15.1	15.1	15.1	330.46	3051	3051	3.01		1	94	2	0	By matching	By matching	By matching	By MS/MS	By MS/MS	By MS/MS	0.4	1.1	0	14
gi|158931161|sp|O00139.3|KIF2A_HUMAN;gi|308153588|sp|Q8N4N8.3|KIF2B_HUMAN	gi|158931161|sp|O00139.3|KIF2A_HUMAN	3;1	3;1	3;1	>gi|158931161|sp|O00139.3|KIF2A_HUMAN RecName: Full=Kinesin-like protein KIF2A; AltName: Full=Kinesin-2; Short=hK2	2	3	3	3	0	0	1	3	2	2	0	0	1	3	2	2	0	0	1	3	2	2	6.1	6.1	6.1	79.954	706	706;673	2.1	1	7	2		0	By matching	By matching	By matching	By MS/MS	By MS/MS	By MS/MS	0	0	1.6	6.1
gi|158937337|sp|Q5VZ89.2|DEN4C_HUMAN	gi|158937337|sp|Q5VZ89.2|DEN4C_HUMAN	7	7	7	>gi|158937337|sp|Q5VZ89.2|DEN4C_HUMAN RecName: Full=DENN domain-containing protein 4C	1	7	7	7	0	0	0	2	4	6	0	0	0	2	4	6	0	0	0	2	4	6	6.3	6.3	6.3	186.85	1673	1673	2.73	1	2	12		0	By matching	By matching	By matching	By matching	By MS/MS	By MS/MS	0	0	0	2
gi|158939140|sp|P36915.2|GNL1_HUMAN	gi|158939140|sp|P36915.2|GNL1_HUMAN	2	2	2	>gi|158939140|sp|P36915.2|GNL1_HUMAN RecName: Full=Guanine nucleotide-binding protein-like 1; AltName: Full=GTP-binding protein HSR1	1	2	2	2	1	1	0	1	1	2	1	1	0	1	1	2	1	1	0	1	1	2	4.1	4.1	4.1	68.66	607	607	2.14		6	1		0	By MS/MS	By matching	By matching	By MS/MS	By MS/MS	By MS/MS	2	2	0	2
gi|158957575|sp|P41214.3|EIF2D_HUMAN	gi|158957575|sp|P41214.3|EIF2D_HUMAN	1	1	1	>gi|158957575|sp|P41214.3|EIF2D_HUMAN RecName: Full=Eukaryotic translation initiation factor 2D; Short=eIF2d; AltName: Full=Hepatocellular carcinoma-associated antigen 56; AltName: Full=Ligatin	1	1	1	1	0	0	0	1	1	0	0	0	0	1	1	0	0	0	0	1	1	0	2.4	2.4	2.4	64.706	584	584	2.5		1	1		0	By matching	By matching	By matching	By MS/MS	By matching	By matching	0	0	0	2.4
gi|160013711|sp|Q76NI1.2|VKIND_HUMAN	gi|160013711|sp|Q76NI1.2|VKIND_HUMAN	1	1	1	>gi|160013711|sp|Q76NI1.2|VKIND_HUMAN RecName: Full=Protein very KIND; AltName: Full=Cerebral protein 9; AltName: Full=KIND domain-containing protein 1; AltName: Full=Kinase non-catalytic C-lobe domain-containing protein 1; AltName: Full=Ras-GEF domain-con	1	1	1	1	0	0	0	1	1	1	0	0	0	1	1	1	0	0	0	1	1	1	0.5	0.5	0.5	191.39	1749	1749	2		3			1	By matching	By matching	By matching	By MS/MS	By matching	By matching	0	0	0	0.5
gi|160013885|sp|Q9Y5P6.2|GMPPB_HUMAN	gi|160013885|sp|Q9Y5P6.2|GMPPB_HUMAN	2	2	2	>gi|160013885|sp|Q9Y5P6.2|GMPPB_HUMAN RecName: Full=Mannose-1-phosphate guanyltransferase beta; AltName: Full=GDP-mannose pyrophosphorylase B; AltName: Full=GTP-mannose-1-phosphate guanylyltransferase beta	1	2	2	2	1	0	1	2	2	2	1	0	1	2	2	2	1	0	1	2	2	2	6.4	6.4	6.4	39.834	360	360	2		8			0	By matching	By matching	By matching	By MS/MS	By MS/MS	By matching	3.3	0	3.3	6.4
gi|160019013|sp|O75179.3|ANR17_HUMAN	gi|160019013|sp|O75179.3|ANR17_HUMAN	11	11	6	>gi|160019013|sp|O75179.3|ANR17_HUMAN RecName: Full=Ankyrin repeat domain-containing protein 17; AltName: Full=Gene trap ankyrin repeat protein; AltName: Full=Serologically defined breast cancer antigen NY-BR-16	1	11	11	6	1	1	2	9	9	11	1	1	2	9	9	11	0	1	1	4	4	6	6	6	3	274.25	2603	2603	3			39		0	By matching	By matching	By matching	By MS/MS	By MS/MS	By MS/MS	0.7	0.5	1.2	5
gi|160112850|sp|Q9GZT8.2|NIF3L_HUMAN	gi|160112850|sp|Q9GZT8.2|NIF3L_HUMAN	2	2	2	>gi|160112850|sp|Q9GZT8.2|NIF3L_HUMAN RecName: Full=NIF3-like protein 1; AltName: Full=Amyotrophic lateral sclerosis 2 chromosomal region candidate gene 1 protein	1	2	2	2	0	0	0	2	2	2	0	0	0	2	2	2	0	0	0	2	2	2	6.4	6.4	6.4	41.968	377	377	1.89	1	8			0	By matching	By matching	By matching	By MS/MS	By MS/MS	By MS/MS	0	0	0	6.4
gi|160113102|sp|P09758.3|TACD2_HUMAN	gi|160113102|sp|P09758.3|TACD2_HUMAN	1	1	1	>gi|160113102|sp|P09758.3|TACD2_HUMAN RecName: Full=Tumor-associated calcium signal transducer 2; AltName: Full=Cell surface glycoprotein Trop-2; AltName: Full=Membrane component chromosome 1 surface marker 1; AltName: Full=Pancreatic carcinoma marker prot	1	1	1	1	0	0	1	0	0	0	0	0	1	0	0	0	0	0	1	0	0	0	5	5	5	35.709	323	323	1	1				0	By matching	By matching	By MS/MS	By matching	By matching	By matching	0	0	5	0
gi|160185645|sp|Q9NWH9.2|SLTM_HUMAN	gi|160185645|sp|Q9NWH9.2|SLTM_HUMAN	2	2	2	>gi|160185645|sp|Q9NWH9.2|SLTM_HUMAN RecName: Full=SAFB-like transcription modulator; AltName: Full=Modulator of estrogen-induced transcription	1	2	2	2	0	0	0	1	2	2	0	0	0	1	2	2	0	0	0	1	2	2	1.9	1.9	1.9	117.15	1034	1034	2.71		2	5		0	By matching	By matching	By matching	By MS/MS	By MS/MS	By MS/MS	0	0	0	1.9
gi|160331913|sp|O95486.2|SC24A_HUMAN	gi|160331913|sp|O95486.2|SC24A_HUMAN	3	3	3	>gi|160331913|sp|O95486.2|SC24A_HUMAN RecName: Full=Protein transport protein Sec24A; AltName: Full=SEC24-related protein A	1	3	3	3	0	0	0	3	2	1	0	0	0	3	2	1	0	0	0	3	2	1	3.9	3.9	3.9	119.75	1093	1093	3			6		0	By matching	By matching	By matching	By MS/MS	By MS/MS	By MS/MS	0	0	0	3.9
gi|160332299|sp|Q02218.3|ODO1_HUMAN;gi|160419019|sp|Q9ULD0.3|OGDHL_HUMAN	gi|160332299|sp|Q02218.3|ODO1_HUMAN	15;3	15;3	15;3	>gi|160332299|sp|Q02218.3|ODO1_HUMAN RecName: Full=2-oxoglutarate dehydrogenase, mitochondrial; AltName: Full=2-oxoglutarate dehydrogenase complex component E1; Short=OGDC-E1; AltName: Full=Alpha-ketoglutarate dehydrogenase; Flags: Precursor	2	15	15	15	0	0	0	13	15	14	0	0	0	13	15	14	0	0	0	13	15	14	23.3	23.3	23.3	115.93	1023	1023;1010	3			47		0	By matching	By matching	By matching	By MS/MS	By MS/MS	By MS/MS	0	0	0	19.5
gi|160332304|sp|O14795.2|UN13B_HUMAN;gi|374095515|sp|Q9UPW8.4|UN13A_HUMAN	gi|160332304|sp|O14795.2|UN13B_HUMAN	3;1	3;1	3;1	>gi|160332304|sp|O14795.2|UN13B_HUMAN RecName: Full=Protein unc-13 homolog B; AltName: Full=Munc13-2; Short=munc13	2	3	3	3	0	0	0	1	2	3	0	0	0	1	2	3	0	0	0	1	2	3	2.6	2.6	2.6	180.68	1591	1591;1703	3			6		0	By matching	By matching	By matching	By MS/MS	By matching	By MS/MS	0	0	0	0.8
gi|160332310|sp|Q92890.3|UFD1_HUMAN	gi|160332310|sp|Q92890.3|UFD1_HUMAN	3	3	3	>gi|160332310|sp|Q92890.3|UFD1_HUMAN RecName: Full=Ubiquitin fusion degradation protein 1 homolog; Short=UB fusion protein 1	1	3	3	3	0	0	1	3	3	3	0	0	1	3	3	3	0	0	1	3	3	3	13	13	13	34.5	307	307	2.17	1	9	1	1	0	By matching	By matching	By matching	By MS/MS	By MS/MS	By MS/MS	0	0	3.9	13
gi|160332311|sp|P51610.2|HCFC1_HUMAN	gi|160332311|sp|P51610.2|HCFC1_HUMAN	9	9	9	>gi|160332311|sp|P51610.2|HCFC1_HUMAN RecName: Full=Host cell factor 1; Short=HCF; Short=HCF-1; AltName: Full=C1 factor; AltName: Full=CFF; AltName: Full=VCAF; AltName: Full=VP16 accessory protein; Contains: RecName: Full=HCF N-terminal chain 1; Contains:	1	9	9	9	2	0	1	7	8	8	2	0	1	7	8	8	2	0	1	7	8	8	7.9	7.9	7.9	208.73	2035	2035	2.8		6	24		0	By MS/MS	By matching	By matching	By MS/MS	By MS/MS	By MS/MS	1.3	0	0.7	5.7
gi|160332335|sp|Q09666.2|AHNK_HUMAN	gi|160332335|sp|Q09666.2|AHNK_HUMAN	9	9	9	>gi|160332335|sp|Q09666.2|AHNK_HUMAN RecName: Full=Neuroblast differentiation-associated protein AHNAK; AltName: Full=Desmoyokin	1	9	9	9	0	1	3	7	5	6	0	1	3	7	5	6	0	1	3	7	5	6	5.7	5.7	5.7	629.09	5890	5890	2.68	4	1	23		0	By matching	By matching	By MS/MS	By MS/MS	By MS/MS	By MS/MS	0	1.8	1.7	5.2
gi|160358766|sp|Q8WU68.2|U2AF4_HUMAN;gi|998490989|sp|P0DN76.1|U2AF5_HUMAN;gi|267187|sp|Q01081.3|U2AF1_HUMAN	gi|160358766|sp|Q8WU68.2|U2AF4_HUMAN;gi|998490989|sp|P0DN76.1|U2AF5_HUMAN;gi|267187|sp|Q01081.3|U2AF1_HUMAN	1;1;1	1;1;1	1;1;1	>gi|160358766|sp|Q8WU68.2|U2AF4_HUMAN RecName: Full=Splicing factor U2AF 26 kDa subunit; AltName: Full=U2 auxiliary factor 26; AltName: Full=U2 small nuclear RNA auxiliary factor 1-like protein 4; Short=U2AF1-like 4; AltName: Full=U2(RNU2) small nuclear RN	3	1	1	1	0	0	0	1	1	1	0	0	0	1	1	1	0	0	0	1	1	1	5.5	5.5	5.5	25.743	220	220;240;240	1	3				0.0017212	By matching	By matching	By matching	By matching	By MS/MS	By MS/MS	0	0	0	5.5
gi|160359050|sp|Q8TDY2.3|RBCC1_HUMAN	gi|160359050|sp|Q8TDY2.3|RBCC1_HUMAN	12	12	12	>gi|160359050|sp|Q8TDY2.3|RBCC1_HUMAN RecName: Full=RB1-inducible coiled-coil protein 1; AltName: Full=FAK family kinase-interacting protein of 200 kDa; Short=FIP200	1	12	12	12	0	1	0	10	12	8	0	1	0	10	12	8	0	1	0	10	12	8	10.5	10.5	10.5	183.09	1594	1594	2.94		3	30	1	0	By matching	By matching	By matching	By MS/MS	By MS/MS	By MS/MS	0	0.8	0	9.1
gi|160380694|sp|O94830.2|DDHD2_HUMAN	gi|160380694|sp|O94830.2|DDHD2_HUMAN	1	1	1	>gi|160380694|sp|O94830.2|DDHD2_HUMAN RecName: Full=Phospholipase DDHD2; AltName: Full=DDHD domain-containing protein 2; AltName: Full=KIAA0725p; AltName: Full=SAM, WWE and DDHD domain-containing protein 1	1	1	1	1	0	0	0	1	1	1	0	0	0	1	1	1	0	0	0	1	1	1	2	2	2	81.031	711	711	2		3			0.0069134	By matching	By matching	By matching	By MS/MS	By MS/MS	By matching	0	0	0	2
gi|160385708|sp|Q9BUQ8.3|DDX23_HUMAN	gi|160385708|sp|Q9BUQ8.3|DDX23_HUMAN	1	1	1	>gi|160385708|sp|Q9BUQ8.3|DDX23_HUMAN RecName: Full=Probable ATP-dependent RNA helicase DDX23; AltName: Full=100 kDa U5 snRNP-specific protein; AltName: Full=DEAD box protein 23; AltName: Full=PRP28 homolog; AltName: Full=U5-100kD	1	1	1	1	0	0	0	0	1	1	0	0	0	0	1	1	0	0	0	0	1	1	1.5	1.5	1.5	95.581	820	820	3			3		0	By matching	By matching	By matching	By matching	By MS/MS	By MS/MS	0	0	0	0
gi|160410004|sp|Q66K74.2|MAP1S_HUMAN	gi|160410004|sp|Q66K74.2|MAP1S_HUMAN	2	2	2	>gi|160410004|sp|Q66K74.2|MAP1S_HUMAN RecName: Full=Microtubule-associated protein 1S; Short=MAP-1S; AltName: Full=BPY2-interacting protein 1; AltName: Full=Microtubule-associated protein 8; AltName: Full=Variable charge Y chromosome 2-interacting protein	1	2	2	2	0	0	0	2	0	0	0	0	0	2	0	0	0	0	0	2	0	0	3.3	3.3	3.3	112.21	1059	1059	3			2		0.0029424	By matching	By matching	By matching	By MS/MS	By matching	By matching	0	0	0	3.3
gi|161784343|sp|P35237.3|SPB6_HUMAN	gi|161784343|sp|P35237.3|SPB6_HUMAN	16	16	15	>gi|161784343|sp|P35237.3|SPB6_HUMAN RecName: Full=Serpin B6; AltName: Full=Cytoplasmic antiproteinase; Short=CAP; AltName: Full=Peptidase inhibitor 6; Short=PI-6; AltName: Full=Placental thrombin inhibitor	1	16	16	15	2	2	4	13	16	15	2	2	4	13	16	15	2	2	4	13	15	15	56.1	56.1	54	42.621	376	376	1.95	5	60		1	0	By matching	By MS/MS	By MS/MS	By MS/MS	By MS/MS	By MS/MS	8	8	14.6	51.1
gi|161789011|sp|Q99873.2|ANM1_HUMAN;gi|88983969|sp|Q9NR22.2|ANM8_HUMAN	gi|161789011|sp|Q99873.2|ANM1_HUMAN	13;1	13;1	13;1	>gi|161789011|sp|Q99873.2|ANM1_HUMAN RecName: Full=Protein arginine N-methyltransferase 1; AltName: Full=Histone-arginine N-methyltransferase PRMT1; AltName: Full=Interferon receptor 1-bound protein 4	2	13	13	13	1	3	0	12	11	12	1	3	0	12	11	12	1	3	0	12	11	12	45.7	45.7	45.7	41.515	361	361;394	2.18	3	47	10	2	0	By matching	By matching	By matching	By MS/MS	By MS/MS	By MS/MS	3	10.8	0	40.7
gi|162416219|sp|Q9P2D3.2|HTR5B_HUMAN	gi|162416219|sp|Q9P2D3.2|HTR5B_HUMAN	2	2	2	>gi|162416219|sp|Q9P2D3.2|HTR5B_HUMAN RecName: Full=HEAT repeat-containing protein 5B	1	2	2	2	1	1	0	2	2	2	1	1	0	2	2	2	1	1	0	2	2	2	1.5	1.5	1.5	224.3	2071	2071	2.6		4	6		0	By matching	By matching	By matching	By MS/MS	By MS/MS	By MS/MS	0.7	0.7	0	1.5
gi|162416224|sp|Q9BVS5.2|TR61B_HUMAN	gi|162416224|sp|Q9BVS5.2|TR61B_HUMAN	1	1	1	>gi|162416224|sp|Q9BVS5.2|TR61B_HUMAN RecName: Full=tRNA (adenine(58)-N(1))-methyltransferase, mitochondrial; Flags: Precursor	1	1	1	1	0	0	0	0	1	0	0	0	0	0	1	0	0	0	0	0	1	0	2.5	2.5	2.5	52.965	477	477	4				1	0.0017286	By matching	By matching	By matching	By matching	By MS/MS	By matching	0	0	0	0
gi|162416228|sp|Q96KR1.2|ZFR_HUMAN	gi|162416228|sp|Q96KR1.2|ZFR_HUMAN	3	3	3	>gi|162416228|sp|Q96KR1.2|ZFR_HUMAN RecName: Full=Zinc finger RNA-binding protein; Short=hZFR; AltName: Full=M-phase phosphoprotein homolog	1	3	3	3	0	0	0	2	3	3	0	0	0	2	3	3	0	0	0	2	3	3	4.7	4.7	4.7	117.01	1074	1074	2.78		2	7		0	By matching	By matching	By matching	By MS/MS	By MS/MS	By MS/MS	0	0	0	3.2
gi|162416270|sp|Q6IAN0.2|DRS7B_HUMAN	gi|162416270|sp|Q6IAN0.2|DRS7B_HUMAN	3	3	3	>gi|162416270|sp|Q6IAN0.2|DRS7B_HUMAN RecName: Full=Dehydrogenase/reductase SDR family member 7B; AltName: Full=Short-chain dehydrogenase/reductase family 32C member 1	1	3	3	3	0	0	0	3	2	3	0	0	0	3	2	3	0	0	0	3	2	3	12.6	12.6	12.6	35.119	325	325	1	9				0	By matching	By matching	By matching	By MS/MS	By MS/MS	By MS/MS	0	0	0	12.6
gi|166198355|sp|Q3SY69.2|AL1L2_HUMAN	gi|166198355|sp|Q3SY69.2|AL1L2_HUMAN	16	16	15	>gi|166198355|sp|Q3SY69.2|AL1L2_HUMAN RecName: Full=Mitochondrial 10-formyltetrahydrofolate dehydrogenase; Short=Mitochondrial 10-FTHFDH; Short=mtFDH; AltName: Full=Aldehyde dehydrogenase family 1 member L2	1	16	16	15	0	0	0	13	12	14	0	0	0	13	12	14	0	0	0	12	11	13	25.4	25.4	24.5	101.74	923	923	2.58		23	29	1	0	By matching	By matching	By matching	By MS/MS	By MS/MS	By MS/MS	0	0	0	19.8
gi|166198367|sp|Q96CM8.2|ACSF2_HUMAN	gi|166198367|sp|Q96CM8.2|ACSF2_HUMAN	4	4	4	>gi|166198367|sp|Q96CM8.2|ACSF2_HUMAN RecName: Full=Acyl-CoA synthetase family member 2, mitochondrial; Flags: Precursor	1	4	4	4	0	0	0	3	4	3	0	0	0	3	4	3	0	0	0	3	4	3	8.6	8.6	8.6	68.124	615	615	2.08	1	10	2		0	By matching	By matching	By matching	By MS/MS	By MS/MS	By MS/MS	0	0	0	6.8
gi|166199462|sp|Q9P035.2|HACD3_HUMAN	gi|166199462|sp|Q9P035.2|HACD3_HUMAN	3	3	3	>gi|166199462|sp|Q9P035.2|HACD3_HUMAN RecName: Full=Very-long-chain (3R)-3-hydroxyacyl-CoA dehydratase 3; AltName: Full=3-hydroxyacyl-CoA dehydratase 3; Short=HACD3; AltName: Full=Butyrate-induced protein 1; Short=B-ind1; Short=hB-ind1; AltName: Full=Prote	1	3	3	3	0	0	0	3	3	3	0	0	0	3	3	3	0	0	0	3	3	3	12.4	12.4	12.4	43.159	362	362	2.08	2	8	3		0	By matching	By matching	By matching	By MS/MS	By MS/MS	By MS/MS	0	0	0	12.4
gi|166201903|sp|Q8TF46.2|DI3L1_HUMAN	gi|166201903|sp|Q8TF46.2|DI3L1_HUMAN	2	2	2	>gi|166201903|sp|Q8TF46.2|DI3L1_HUMAN RecName: Full=DIS3-like exonuclease 1	1	2	2	2	0	0	0	2	2	2	0	0	0	2	2	2	0	0	0	2	2	2	2.4	2.4	2.4	120.79	1054	1054	3			6		0	By matching	By matching	By matching	By MS/MS	By MS/MS	By MS/MS	0	0	0	2.4
gi|166214988|sp|Q96L92.2|SNX27_HUMAN	gi|166214988|sp|Q96L92.2|SNX27_HUMAN	7	7	7	>gi|166214988|sp|Q96L92.2|SNX27_HUMAN RecName: Full=Sorting nexin-27	1	7	7	7	0	0	0	5	7	6	0	0	0	5	7	6	0	0	0	5	7	6	17.6	17.6	17.6	61.264	541	541	2.09		21	2		0	By matching	By matching	By matching	By MS/MS	By MS/MS	By MS/MS	0	0	0	13.1
gi|166215035|sp|Q9Y5L0.3|TNPO3_HUMAN	gi|166215035|sp|Q9Y5L0.3|TNPO3_HUMAN	2	2	2	>gi|166215035|sp|Q9Y5L0.3|TNPO3_HUMAN RecName: Full=Transportin-3; AltName: Full=Importin-12; Short=Imp12; AltName: Full=Transportin-SR; Short=TRN-SR	1	2	2	2	0	0	0	1	1	1	0	0	0	1	1	1	0	0	0	1	1	1	3.9	3.9	3.9	104.2	923	923	2.75		2	1	1	0	By matching	By matching	By matching	By MS/MS	By MS/MS	By matching	0	0	0	1.8
gi|166215588|sp|Q27J81.2|INF2_HUMAN	gi|166215588|sp|Q27J81.2|INF2_HUMAN	4	4	4	>gi|166215588|sp|Q27J81.2|INF2_HUMAN RecName: Full=Inverted formin-2; AltName: Full=HBEBP2-binding protein C	1	4	4	4	0	0	0	4	3	1	0	0	0	4	3	1	0	0	0	4	3	1	5.3	5.3	5.3	135.62	1249	1249	3			9		0	By matching	By matching	By matching	By MS/MS	By MS/MS	By MS/MS	0	0	0	5.3
gi|166216086|sp|A5YKK6.2|CNOT1_HUMAN	gi|166216086|sp|A5YKK6.2|CNOT1_HUMAN	13	13	13	>gi|166216086|sp|A5YKK6.2|CNOT1_HUMAN RecName: Full=CCR4-NOT transcription complex subunit 1; AltName: Full=CCR4-associated factor 1; AltName: Full=Negative regulator of transcription subunit 1 homolog; Short=NOT1H; Short=hNOT1	1	13	13	13	0	0	0	8	9	12	0	0	0	8	9	12	0	0	0	8	9	12	6.7	6.7	6.7	266.94	2376	2376	3			29		0	By matching	By matching	By matching	By MS/MS	By MS/MS	By MS/MS	0	0	0	4.3
gi|166225917|sp|Q69YN2.2|C19L1_HUMAN	gi|166225917|sp|Q69YN2.2|C19L1_HUMAN	2	2	2	>gi|166225917|sp|Q69YN2.2|C19L1_HUMAN RecName: Full=CWF19-like protein 1; Short=C19L1	1	2	2	2	0	0	0	2	2	2	0	0	0	2	2	2	0	0	0	2	2	2	5.6	5.6	5.6	60.618	538	538	1.88	1	7			0.00045025	By matching	By matching	By matching	By MS/MS	By MS/MS	By matching	0	0	0	5.6
gi|166227886|sp|A6NHL2.2|TBAL3_HUMAN	gi|166227886|sp|A6NHL2.2|TBAL3_HUMAN	4	1	1	>gi|166227886|sp|A6NHL2.2|TBAL3_HUMAN RecName: Full=Tubulin alpha chain-like 3	1	4	1	1	3	2	2	4	4	4	0	0	0	1	1	1	0	0	0	1	1	1	8.3	3.8	3.8	49.908	446	446	4				3	1	By matching	By matching	By matching	By MS/MS	By matching	By matching	4.5	4.5	4.5	8.3
gi|166232397|sp|Q7Z2Z2.2|EFL1_HUMAN	gi|166232397|sp|Q7Z2Z2.2|EFL1_HUMAN	8	8	8	>gi|166232397|sp|Q7Z2Z2.2|EFL1_HUMAN RecName: Full=Elongation factor-like GTPase 1; AltName: Full=Elongation factor Tu GTP-binding domain-containing protein 1; AltName: Full=Elongation factor-like 1; AltName: Full=Protein FAM42A	1	8	8	8	0	1	0	7	7	8	0	1	0	7	7	8	0	1	0	7	7	8	11.2	11.2	11.2	125.43	1120	1120	3		1	27	1	0	By matching	By matching	By matching	By MS/MS	By MS/MS	By MS/MS	0	1	0	10
gi|166233344|sp|A3KN83.1|SBNO1_HUMAN	gi|166233344|sp|A3KN83.1|SBNO1_HUMAN	3	3	2	>gi|166233344|sp|A3KN83.1|SBNO1_HUMAN RecName: Full=Protein strawberry notch homolog 1; AltName: Full=Monocyte protein 3; Short=MOP-3	1	3	3	2	2	0	0	3	3	2	2	0	0	3	3	2	1	0	0	2	2	1	3.3	3.3	2.4	154.31	1393	1393	2.9		1	9		0	By matching	By matching	By matching	By MS/MS	By MS/MS	By MS/MS	1.9	0	0	3.3
gi|166233528|sp|Q49AJ0.2|F135B_HUMAN	gi|166233528|sp|Q49AJ0.2|F135B_HUMAN	1	1	1	>gi|166233528|sp|Q49AJ0.2|F135B_HUMAN RecName: Full=Protein FAM135B	1	1	1	1	0	0	0	0	0	1	0	0	0	0	0	1	0	0	0	0	0	1	0.9	0.9	0.9	155.77	1406	1406	2		1			1	By matching	By matching	By matching	By matching	By matching	By MS/MS	0	0	0	0
gi|166233818|sp|A1L0T0.2|ILVBL_HUMAN	gi|166233818|sp|A1L0T0.2|ILVBL_HUMAN	1	1	1	>gi|166233818|sp|A1L0T0.2|ILVBL_HUMAN RecName: Full=Acetolactate synthase-like protein; AltName: Full=IlvB-like protein	1	1	1	1	0	0	0	1	1	1	0	0	0	1	1	1	0	0	0	1	1	1	3.6	3.6	3.6	67.867	632	632	2		3			0	By matching	By matching	By matching	By MS/MS	By MS/MS	By MS/MS	0	0	0	3.6
gi|166900096|sp|P01031.4|CO5_HUMAN	gi|166900096|sp|P01031.4|CO5_HUMAN	3	3	3	>gi|166900096|sp|P01031.4|CO5_HUMAN RecName: Full=Complement C5; AltName: Full=C3 and PZP-like alpha-2-macroglobulin domain-containing protein 4; Contains: RecName: Full=Complement C5 beta chain; Contains: RecName: Full=Complement C5 alpha chain; Contains:	1	3	3	3	1	0	3	1	1	1	1	0	3	1	1	1	1	0	3	1	1	1	2.1	2.1	2.1	188.3	1676	1676	2.29	4			3	0	By matching	By matching	By MS/MS	By MS/MS	By matching	By matching	0.8	0	2.1	0.6
gi|166971555|sp|Q641Q2.3|FA21A_HUMAN;gi|284018172|sp|Q9Y4E1.3|FA21C_HUMAN;gi|190359329|sp|Q5SRD0.2|FA21D_HUMAN	gi|166971555|sp|Q641Q2.3|FA21A_HUMAN;gi|284018172|sp|Q9Y4E1.3|FA21C_HUMAN;gi|190359329|sp|Q5SRD0.2|FA21D_HUMAN	4;3;2	4;3;2	4;3;2	>gi|166971555|sp|Q641Q2.3|FA21A_HUMAN RecName: Full=WASH complex subunit FAM21A;>gi|284018172|sp|Q9Y4E1.3|FA21C_HUMAN RecName: Full=WASH complex subunit FAM21C; AltName: Full=Vaccinia virus penetration factor; Short=VPEF;>gi|190359329|sp|Q5SRD0.2|FA21D_HUM	3	4	4	4	0	0	0	3	4	3	0	0	0	3	4	3	0	0	0	3	4	3	5.4	5.4	5.4	147.18	1341	1341;1318;308	2.92		1	11		0	By matching	By matching	By matching	By MS/MS	By MS/MS	By MS/MS	0	0	0	3.7
gi|166987826|sp|A6NDG6.1|PGP_HUMAN	gi|166987826|sp|A6NDG6.1|PGP_HUMAN	5	5	5	>gi|166987826|sp|A6NDG6.1|PGP_HUMAN RecName: Full=Glycerol-3-phosphate phosphatase; Short=G3PP; AltName: Full=Aspartate-based ubiquitous Mg(2+)-dependent phosphatase; Short=AUM; AltName: Full=Phosphoglycolate phosphatase; Short=PGP	1	5	5	5	0	0	0	4	5	5	0	0	0	4	5	5	0	0	0	4	5	5	19	19	19	34.006	321	321	1	14				0	By matching	By matching	By matching	By MS/MS	By MS/MS	By MS/MS	0	0	0	14.3
gi|166988174|sp|Q7Z2T5.2|TRM1L_HUMAN	gi|166988174|sp|Q7Z2T5.2|TRM1L_HUMAN	2	2	2	>gi|166988174|sp|Q7Z2T5.2|TRM1L_HUMAN RecName: Full=TRMT1-like protein	1	2	2	2	1	0	0	2	2	2	1	0	0	2	2	2	1	0	0	2	2	2	4.5	4.5	4.5	81.746	733	733	2.45		6	5		0	By matching	By matching	By matching	By MS/MS	By MS/MS	By MS/MS	2	0	0	4.5
gi|167008724|sp|Q9UHD1.2|CHRD1_HUMAN	gi|167008724|sp|Q9UHD1.2|CHRD1_HUMAN	6	6	6	>gi|167008724|sp|Q9UHD1.2|CHRD1_HUMAN RecName: Full=Cysteine and histidine-rich domain-containing protein 1; AltName: Full=CHORD domain-containing protein 1; Short=CHORD-containing protein 1; Short=CHP-1; AltName: Full=Protein morgana	1	6	6	6	1	0	0	5	6	6	1	0	0	5	6	6	1	0	0	5	6	6	24.7	24.7	24.7	37.489	332	332	1.93	2	25			0	By matching	By matching	By matching	By MS/MS	By MS/MS	By MS/MS	4.2	0	0	20.2
gi|167016554|sp|Q6NUK1.2|SCMC1_HUMAN	gi|167016554|sp|Q6NUK1.2|SCMC1_HUMAN	2	2	2	>gi|167016554|sp|Q6NUK1.2|SCMC1_HUMAN RecName: Full=Calcium-binding mitochondrial carrier protein SCaMC-1; AltName: Full=Mitochondrial ATP-Mg/Pi carrier protein 1; AltName: Full=Mitochondrial Ca(2+)-dependent solute carrier protein 1; AltName: Full=Small c	1	2	2	2	0	0	0	1	1	2	0	0	0	1	1	2	0	0	0	1	1	2	6.1	6.1	6.1	53.354	477	477	3		2		2	0	By matching	By matching	By matching	By MS/MS	By MS/MS	By MS/MS	0	0	0	2.7
gi|167016563|sp|Q9NTJ5.2|SAC1_HUMAN	gi|167016563|sp|Q9NTJ5.2|SAC1_HUMAN	4	4	4	>gi|167016563|sp|Q9NTJ5.2|SAC1_HUMAN RecName: Full=Phosphatidylinositide phosphatase SAC1; AltName: Full=Suppressor of actin mutations 1-like protein	1	4	4	4	0	0	1	4	4	4	0	0	1	4	4	4	0	0	1	4	4	4	7.7	7.7	7.7	66.966	587	587	2	1	15	1		0	By matching	By matching	By matching	By MS/MS	By MS/MS	By MS/MS	0	0	1.7	7.7
gi|1703012|sp|P49902.1|5NTC_HUMAN	gi|1703012|sp|P49902.1|5NTC_HUMAN	5	5	5	>gi|1703012|sp|P49902.1|5NTC_HUMAN RecName: Full=Cytosolic purine 5-nucleotidase; AltName: Full=Cytosolic 5-nucleotidase II	1	5	5	5	0	0	0	2	5	2	0	0	0	2	5	2	0	0	0	2	5	2	13.5	13.5	13.5	64.969	561	561	2		9			0	By matching	By matching	By matching	By MS/MS	By MS/MS	By MS/MS	0	0	0	4.5
gi|1703037|sp|P54619.1|AAKG1_HUMAN	gi|1703037|sp|P54619.1|AAKG1_HUMAN	4	4	4	>gi|1703037|sp|P54619.1|AAKG1_HUMAN RecName: Full=5-AMP-activated protein kinase subunit gamma-1; Short=AMPK gamma1; Short=AMPK subunit gamma-1; Short=AMPKg	1	4	4	4	0	0	0	3	4	2	0	0	0	3	4	2	0	0	0	3	4	2	17.5	17.5	17.5	37.579	331	331	2.1		9	1		0	By matching	By matching	By matching	By MS/MS	By MS/MS	By MS/MS	0	0	0	12.4
gi|1703052|sp|P35249.2|RFC4_HUMAN	gi|1703052|sp|P35249.2|RFC4_HUMAN	5	5	5	>gi|1703052|sp|P35249.2|RFC4_HUMAN RecName: Full=Replication factor C subunit 4; AltName: Full=Activator 1 37 kDa subunit; Short=A1 37 kDa subunit; AltName: Full=Activator 1 subunit 4; AltName: Full=Replication factor C 37 kDa subunit; Short=RF-C 37 kDa su	1	5	5	5	1	0	0	4	5	4	1	0	0	4	5	4	1	0	0	4	5	4	17.9	17.9	17.9	39.681	363	363	1.88	2	15			0	By matching	By matching	By matching	By MS/MS	By MS/MS	By MS/MS	2.8	0	0	15.2
gi|1703068|sp|P49748.1|ACADV_HUMAN	gi|1703068|sp|P49748.1|ACADV_HUMAN	6	6	6	>gi|1703068|sp|P49748.1|ACADV_HUMAN RecName: Full=Very long-chain specific acyl-CoA dehydrogenase, mitochondrial; Short=VLCAD; Flags: Precursor	1	6	6	6	0	0	1	6	6	6	0	0	1	6	6	6	0	0	1	6	6	6	11.9	11.9	11.9	70.389	655	655	1.95	1	18			0	By matching	By matching	By matching	By MS/MS	By MS/MS	By MS/MS	0	0	1.8	11.9
gi|1703273|sp|P50579.1|MAP2_HUMAN	gi|1703273|sp|P50579.1|MAP2_HUMAN	1	1	1	>gi|1703273|sp|P50579.1|MAP2_HUMAN RecName: Full=Methionine aminopeptidase 2; Short=MAP 2; Short=MetAP 2; AltName: Full=Initiation factor 2-associated 67 kDa glycoprotein; Short=p67; Short=p67eIF2; AltName: Full=Peptidase M	1	1	1	1	0	0	0	0	1	0	0	0	0	0	1	0	0	0	0	0	1	0	7.3	7.3	7.3	52.891	478	478	2		1			0	By matching	By matching	By matching	By matching	By MS/MS	By matching	0	0	0	0
gi|1703322|sp|P50995.1|ANX11_HUMAN	gi|1703322|sp|P50995.1|ANX11_HUMAN	5	5	5	>gi|1703322|sp|P50995.1|ANX11_HUMAN RecName: Full=Annexin A11; AltName: Full=56 kDa autoantigen; AltName: Full=Annexin XI; AltName: Full=Annexin-11; AltName: Full=Calcyclin-associated annexin 50; Short=CAP-50	1	5	5	5	0	1	0	3	5	3	0	1	0	3	5	3	0	1	0	3	5	3	12.1	12.1	12.1	54.389	505	505	4				12	0	By matching	By matching	By matching	By MS/MS	By MS/MS	By MS/MS	0	1.8	0	6.7
gi|1703470|sp|P54709.1|AT1B3_HUMAN	gi|1703470|sp|P54709.1|AT1B3_HUMAN	2	2	2	>gi|1703470|sp|P54709.1|AT1B3_HUMAN RecName: Full=Sodium/potassium-transporting ATPase subunit beta-3; AltName: Full=Sodium/potassium-dependent ATPase subunit beta-3; Short=ATPB-3; AltName: CD_antigen=CD298	1	2	2	2	1	0	0	2	2	2	1	0	0	2	2	2	1	0	0	2	2	2	10.4	10.4	10.4	31.512	279	279	1.33	6	3			0	By matching	By matching	By matching	By MS/MS	By MS/MS	By matching	5	0	0	10.4
gi|1705650|sp|P52907.3|CAZA1_HUMAN	gi|1705650|sp|P52907.3|CAZA1_HUMAN	9	9	8	>gi|1705650|sp|P52907.3|CAZA1_HUMAN RecName: Full=F-actin-capping protein subunit alpha-1; AltName: Full=CapZ alpha-1	1	9	9	8	1	1	0	9	9	8	1	1	0	9	9	8	1	1	0	8	8	7	40.2	40.2	36.7	32.922	286	286	1.89	12	27	5	1	0	By matching	By matching	By matching	By MS/MS	By MS/MS	By MS/MS	4.9	5.2	0	40.2
gi|1705654|sp|Q09161.1|NCBP1_HUMAN	gi|1705654|sp|Q09161.1|NCBP1_HUMAN	4	4	4	>gi|1705654|sp|Q09161.1|NCBP1_HUMAN RecName: Full=Nuclear cap-binding protein subunit 1; AltName: Full=80 kDa nuclear cap-binding protein; Short=CBP80; Short=NCBP 80 kDa subunit	1	4	4	4	0	0	0	4	3	3	0	0	0	4	3	3	0	0	0	4	3	3	6.7	6.7	6.7	91.838	790	790	2.09		10	1		0	By matching	By matching	By matching	By MS/MS	By MS/MS	By MS/MS	0	0	0	6.7
gi|1705722|sp|P50613.1|CDK7_HUMAN	gi|1705722|sp|P50613.1|CDK7_HUMAN	1	1	1	>gi|1705722|sp|P50613.1|CDK7_HUMAN RecName: Full=Cyclin-dependent kinase 7; AltName: Full=39 kDa protein kinase; Short=p39 Mo15; AltName: Full=CDK-activating kinase 1; AltName: Full=Cell division protein kinase 7; AltName: Full=Serine/threonine-protein kin	1	1	1	1	0	0	0	1	1	1	0	0	0	1	1	1	0	0	0	1	1	1	4.3	4.3	4.3	39.038	346	346	2		3			0.0053697	By matching	By matching	By matching	By MS/MS	By matching	By MS/MS	0	0	0	4.3
gi|1705725|sp|P51572.3|BAP31_HUMAN	gi|1705725|sp|P51572.3|BAP31_HUMAN	1	1	1	>gi|1705725|sp|P51572.3|BAP31_HUMAN RecName: Full=B-cell receptor-associated protein 31; Short=BCR-associated protein 31; Short=Bap31; AltName: Full=6C6-AG tumor-associated antigen; AltName: Full=Protein CDM; AltName: Full=p28	1	1	1	1	0	0	0	1	1	1	0	0	0	1	1	1	0	0	0	1	1	1	5.7	5.7	5.7	27.991	246	246	1	6				0.0072845	By matching	By matching	By matching	By matching	By MS/MS	By matching	0	0	0	5.7
gi|1705916|sp|Q00610.5|CLH1_HUMAN;gi|2506298|sp|P53675.2|CLH2_HUMAN	gi|1705916|sp|Q00610.5|CLH1_HUMAN	48;9	48;9	48;9	>gi|1705916|sp|Q00610.5|CLH1_HUMAN RecName: Full=Clathrin heavy chain 1; AltName: Full=Clathrin heavy chain on chromosome 17; Short=CLH-17	2	48	48	48	2	3	5	43	44	45	2	3	5	43	44	45	2	3	5	43	44	45	42.5	42.5	42.5	191.61	1675	1675;1640	2.88	7	14	185	3	0	By MS/MS	By MS/MS	By MS/MS	By MS/MS	By MS/MS	By MS/MS	1.3	2.3	3.5	38.4
gi|1705945|sp|P09543.2|CN37_HUMAN	gi|1705945|sp|P09543.2|CN37_HUMAN	2	2	2	>gi|1705945|sp|P09543.2|CN37_HUMAN RecName: Full=2,3-cyclic-nucleotide 3-phosphodiesterase; Short=CNP; Short=CNPase; Flags: Precursor	1	2	2	2	0	0	0	2	1	1	0	0	0	2	1	1	0	0	0	2	1	1	7.6	7.6	7.6	47.578	421	421	2		4			0	By matching	By matching	By matching	By MS/MS	By MS/MS	By matching	0	0	0	7.6
gi|1706004|sp|P31146.4|COR1A_HUMAN	gi|1706004|sp|P31146.4|COR1A_HUMAN	1	1	1	>gi|1706004|sp|P31146.4|COR1A_HUMAN RecName: Full=Coronin-1A; AltName: Full=Coronin-like protein A; Short=Clipin-A; AltName: Full=Coronin-like protein p57; AltName: Full=Tryptophan aspartate-containing coat protein; Short=TACO	1	1	1	1	0	0	1	0	0	0	0	0	1	0	0	0	0	0	1	0	0	0	3.5	3.5	3.5	51.026	461	461	1.5	1	1			0.0017361	By matching	By matching	By MS/MS	By matching	By matching	By matching	0	0	3.5	0
gi|1706179|sp|P49711.1|CTCF_HUMAN	gi|1706179|sp|P49711.1|CTCF_HUMAN	1	1	1	>gi|1706179|sp|P49711.1|CTCF_HUMAN RecName: Full=Transcriptional repressor CTCF; AltName: Full=11-zinc finger protein; AltName: Full=CCCTC-binding factor; AltName: Full=CTCFL paralog	1	1	1	1	0	0	0	1	1	1	0	0	0	1	1	1	0	0	0	1	1	1	2.5	2.5	2.5	82.785	727	727	3			3		0	By matching	By matching	By matching	By MS/MS	By matching	By MS/MS	0	0	0	2.5
gi|1706278|sp|P04080.2|CYTB_HUMAN	gi|1706278|sp|P04080.2|CYTB_HUMAN	1	1	1	>gi|1706278|sp|P04080.2|CYTB_HUMAN RecName: Full=Cystatin-B; AltName: Full=CPI-B; AltName: Full=Liver thiol proteinase inhibitor; AltName: Full=Stefin-B	1	1	1	1	1	0	1	1	1	1	1	0	1	1	1	1	1	0	1	1	1	1	12.2	12.2	12.2	11.139	98	98	1	5				0	By matching	By matching	By matching	By MS/MS	By MS/MS	By MS/MS	12.2	0	12.2	12.2
gi|1706299|sp|P51398.1|RT29_HUMAN	gi|1706299|sp|P51398.1|RT29_HUMAN	2	2	2	>gi|1706299|sp|P51398.1|RT29_HUMAN RecName: Full=28S ribosomal protein S29, mitochondrial; Short=MRP-S29; Short=S29mt; AltName: Full=Death-associated protein 3; Short=DAP-3; AltName: Full=Ionizing radiation resistance conferring protein; Flags: Precursor	1	2	2	2	0	0	0	2	2	2	0	0	0	2	2	2	0	0	0	2	2	2	7.3	7.3	7.3	45.566	398	398	2.14		6	1		0	By matching	By matching	By matching	By MS/MS	By MS/MS	By MS/MS	0	0	0	7.3
gi|1706379|sp|P51648.1|AL3A2_HUMAN	gi|1706379|sp|P51648.1|AL3A2_HUMAN	5	5	5	>gi|1706379|sp|P51648.1|AL3A2_HUMAN RecName: Full=Fatty aldehyde dehydrogenase; AltName: Full=Aldehyde dehydrogenase 10; AltName: Full=Aldehyde dehydrogenase family 3 member A2; AltName: Full=Microsomal aldehyde dehydrogenase	1	5	5	5	0	0	1	4	4	5	0	0	1	4	4	5	0	0	1	4	4	5	16.5	16.5	16.5	54.847	485	485	3.73	1		1	13	0	By matching	By matching	By MS/MS	By MS/MS	By MS/MS	By MS/MS	0	0	2.5	11.1
gi|1706396|sp|P51659.3|DHB4_HUMAN	gi|1706396|sp|P51659.3|DHB4_HUMAN	10	10	10	>gi|1706396|sp|P51659.3|DHB4_HUMAN RecName: Full=Peroxisomal multifunctional enzyme type 2; Short=MFE-2; AltName: Full=17-beta-hydroxysteroid dehydrogenase 4; Short=17-beta-HSD 4; AltName: Full=D-bifunctional protein; Short=DBP; AltName: Full=Multifunction	1	10	10	10	0	1	1	9	10	7	0	1	1	9	10	7	0	1	1	9	10	7	22.4	22.4	22.4	79.685	736	736	2.12	5	27	8	1	0	By matching	By matching	By MS/MS	By MS/MS	By MS/MS	By MS/MS	0	2.2	2.2	19
gi|1706473|sp|P25685.4|DNJB1_HUMAN	gi|1706473|sp|P25685.4|DNJB1_HUMAN	3	3	3	>gi|1706473|sp|P25685.4|DNJB1_HUMAN RecName: Full=DnaJ homolog subfamily B member 1; AltName: Full=DnaJ protein homolog 1; AltName: Full=Heat shock 40 kDa protein 1; Short=HSP40; Short=Heat shock protein 40; AltName: Full=Human DnaJ protein 1; Short=hDj-1	1	3	3	3	0	0	0	2	3	3	0	0	0	2	3	3	0	0	0	2	3	3	11.2	11.2	11.2	38.044	340	340	2		8			0	By matching	By matching	By matching	By MS/MS	By MS/MS	By MS/MS	0	0	0	8.2
gi|1706474|sp|P31689.2|DNJA1_HUMAN	gi|1706474|sp|P31689.2|DNJA1_HUMAN	11	11	11	>gi|1706474|sp|P31689.2|DNJA1_HUMAN RecName: Full=DnaJ homolog subfamily A member 1; AltName: Full=DnaJ protein homolog 2; AltName: Full=HSDJ; AltName: Full=Heat shock 40 kDa protein 4; AltName: Full=Heat shock protein J2; Short=HSJ-2; AltName: Full=Human	1	11	11	11	0	0	1	10	8	9	0	0	1	10	8	9	0	0	1	10	8	9	42.3	42.3	42.3	44.868	397	397	2.73	1	21	2	13	0	By matching	By matching	By matching	By MS/MS	By MS/MS	By MS/MS	0	0	3.3	36
gi|1706611|sp|P49411.2|EFTU_HUMAN	gi|1706611|sp|P49411.2|EFTU_HUMAN	17	17	17	>gi|1706611|sp|P49411.2|EFTU_HUMAN RecName: Full=Elongation factor Tu, mitochondrial; Short=EF-Tu; AltName: Full=P43; Flags: Precursor	1	17	17	17	2	3	6	15	17	14	2	3	6	15	17	14	2	3	6	15	17	14	44.5	44.5	44.5	49.541	452	452	2.64	14	66	29	40	0	By MS/MS	By MS/MS	By MS/MS	By MS/MS	By MS/MS	By MS/MS	4.9	4.9	17.5	42.5
gi|1706639|sp|P50402.1|EMD_HUMAN	gi|1706639|sp|P50402.1|EMD_HUMAN	6	6	6	>gi|1706639|sp|P50402.1|EMD_HUMAN RecName: Full=Emerin	1	6	6	6	0	0	1	6	4	5	0	0	1	6	4	5	0	0	1	6	4	5	32.3	32.3	32.3	28.994	254	254	1.06	16	1			0	By matching	By matching	By matching	By MS/MS	By MS/MS	By MS/MS	0	0	6.7	32.3
gi|1706799|sp|P02671.2|FIBA_HUMAN	gi|1706799|sp|P02671.2|FIBA_HUMAN	22	22	22	>gi|1706799|sp|P02671.2|FIBA_HUMAN RecName: Full=Fibrinogen alpha chain; Contains: RecName: Full=Fibrinopeptide A; Contains: RecName: Full=Fibrinogen alpha chain; Flags: Precursor	1	22	22	22	0	0	22	5	3	3	0	0	22	5	3	3	0	0	22	5	3	3	24.5	24.5	24.5	94.972	866	866	1.21	45	5	3		0	By matching	By matching	By MS/MS	By matching	By MS/MS	By MS/MS	0	0	24.5	5.5
gi|1706870|sp|P30043.3|BLVRB_HUMAN	gi|1706870|sp|P30043.3|BLVRB_HUMAN	1	1	1	>gi|1706870|sp|P30043.3|BLVRB_HUMAN RecName: Full=Flavin reductase (NADPH); Short=FR; AltName: Full=Biliverdin reductase B; Short=BVR-B; AltName: Full=Biliverdin-IX beta-reductase; AltName: Full=Green heme-binding protein; Short=GHBP; AltName: Full=NADPH-d	1	1	1	1	0	0	0	1	1	1	0	0	0	1	1	1	0	0	0	1	1	1	6.8	6.8	6.8	22.119	206	206	1	3				0.0045568	By matching	By matching	By matching	By matching	By MS/MS	By matching	0	0	0	6.8
gi|1706921|sp|P49914.2|MTHFS_HUMAN	gi|1706921|sp|P49914.2|MTHFS_HUMAN	1	1	1	>gi|1706921|sp|P49914.2|MTHFS_HUMAN RecName: Full=5-formyltetrahydrofolate cyclo-ligase; AltName: Full=5,10-methenyl-tetrahydrofolate synthetase; Short=MTHFS; Short=Methenyl-THF synthetase	1	1	1	1	0	0	0	1	1	1	0	0	0	1	1	1	0	0	0	1	1	1	5.9	5.9	5.9	23.255	203	203	4				3	0.0094974	By matching	By matching	By matching	By matching	By MS/MS	By matching	0	0	0	5.9
gi|1707886|sp|P31150.2|GDIA_HUMAN	gi|1707886|sp|P31150.2|GDIA_HUMAN	8	8	5	>gi|1707886|sp|P31150.2|GDIA_HUMAN RecName: Full=Rab GDP dissociation inhibitor alpha; Short=Rab GDI alpha; AltName: Full=Guanosine diphosphate dissociation inhibitor 1; Short=GDI-1; AltName: Full=Oligophrenin-2; AltName: Full=Protein XAP-4	1	8	8	5	1	1	0	7	7	7	1	1	0	7	7	7	1	1	0	4	4	4	32	32	19.2	50.582	447	447	3.48		8	1	24	0	By matching	By matching	By matching	By MS/MS	By MS/MS	By MS/MS	3.4	3.4	0	25.1
gi|1707892|sp|P52565.3|GDIR1_HUMAN	gi|1707892|sp|P52565.3|GDIR1_HUMAN	4	4	4	>gi|1707892|sp|P52565.3|GDIR1_HUMAN RecName: Full=Rho GDP-dissociation inhibitor 1; Short=Rho GDI 1; AltName: Full=Rho-GDI alpha	1	4	4	4	1	1	0	4	4	4	1	1	0	4	4	4	1	1	0	4	4	4	22.1	22.1	22.1	23.207	204	204	3.31	6			20	0	By matching	By matching	By matching	By MS/MS	By MS/MS	By MS/MS	7.4	7.4	0	22.1
gi|1708072|sp|P49915.1|GUAA_HUMAN	gi|1708072|sp|P49915.1|GUAA_HUMAN	20	20	20	>gi|1708072|sp|P49915.1|GUAA_HUMAN RecName: Full=GMP synthase [glutamine-hydrolyzing]; AltName: Full=GMP synthetase; AltName: Full=Glutamine amidotransferase	1	20	20	20	0	0	0	17	18	15	0	0	0	17	18	15	0	0	0	17	18	15	39.2	39.2	39.2	76.715	693	693	2.1		57	6		0	By matching	By matching	By matching	By MS/MS	By MS/MS	By MS/MS	0	0	0	35.4
gi|1708157|sp|P51858.1|HDGF_HUMAN	gi|1708157|sp|P51858.1|HDGF_HUMAN	5	5	5	>gi|1708157|sp|P51858.1|HDGF_HUMAN RecName: Full=Hepatoma-derived growth factor; Short=HDGF; AltName: Full=High mobility group protein 1-like 2; Short=HMG-1L2	1	5	5	5	1	1	0	4	5	3	1	1	0	4	5	3	1	1	0	4	5	3	26.2	26.2	26.2	26.788	240	240	1.84	6	17	2		0	By matching	By matching	By matching	By MS/MS	By MS/MS	By MS/MS	4.2	4.2	0	22.1
gi|1708393|sp|P54105.1|ICLN_HUMAN	gi|1708393|sp|P54105.1|ICLN_HUMAN	3	3	3	>gi|1708393|sp|P54105.1|ICLN_HUMAN RecName: Full=Methylosome subunit pICln; AltName: Full=Chloride channel, nucleotide sensitive 1A; AltName: Full=Chloride conductance regulatory protein ICln; Short=I(Cln); AltName: Full=Chloride ion current inducer protei	1	3	3	3	0	0	0	3	2	3	0	0	0	3	2	3	0	0	0	3	2	3	26.6	26.6	26.6	26.215	237	237	1	11				0	By matching	By matching	By matching	By MS/MS	By MS/MS	By MS/MS	0	0	0	26.6
gi|1708399|sp|P50213.1|IDH3A_HUMAN	gi|1708399|sp|P50213.1|IDH3A_HUMAN	6	6	6	>gi|1708399|sp|P50213.1|IDH3A_HUMAN RecName: Full=Isocitrate dehydrogenase [NAD] subunit alpha, mitochondrial; AltName: Full=Isocitric dehydrogenase subunit alpha; AltName: Full=NAD(+)-specific ICDH subunit alpha; Flags: Precursor	1	6	6	6	0	0	0	5	5	5	0	0	0	5	5	5	0	0	0	5	5	5	19.9	19.9	19.9	39.591	366	366	2.09	3	17	1	2	0	By matching	By matching	By matching	By MS/MS	By MS/MS	By MS/MS	0	0	0	15.3
gi|1708404|sp|P51553.1|IDH3G_HUMAN	gi|1708404|sp|P51553.1|IDH3G_HUMAN	1	1	1	>gi|1708404|sp|P51553.1|IDH3G_HUMAN RecName: Full=Isocitrate dehydrogenase [NAD] subunit gamma, mitochondrial; AltName: Full=Isocitric dehydrogenase subunit gamma; AltName: Full=NAD(+)-specific ICDH subunit gamma; Flags: Precursor	1	1	1	1	0	0	0	1	0	1	0	0	0	1	0	1	0	0	0	1	0	1	7.9	7.9	7.9	42.794	393	393	2		2			0	By matching	By matching	By matching	By MS/MS	By matching	By MS/MS	0	0	0	7.9
gi|1708480|sp|P52292.1|IMA1_HUMAN	gi|1708480|sp|P52292.1|IMA1_HUMAN	5	5	5	>gi|1708480|sp|P52292.1|IMA1_HUMAN RecName: Full=Importin subunit alpha-1; AltName: Full=Karyopherin subunit alpha-2; AltName: Full=RAG cohort protein 1; AltName: Full=SRP1-alpha	1	5	5	5	1	2	0	5	5	5	1	2	0	5	5	5	1	2	0	5	5	5	15.3	15.3	15.3	57.861	529	529	2.36		24	6	3	0	By MS/MS	By matching	By matching	By MS/MS	By MS/MS	By MS/MS	3.4	5.5	0	15.3
gi|1708543|sp|P49773.2|HINT1_HUMAN	gi|1708543|sp|P49773.2|HINT1_HUMAN	1	1	1	>gi|1708543|sp|P49773.2|HINT1_HUMAN RecName: Full=Histidine triad nucleotide-binding protein 1; AltName: Full=Adenosine 5-monophosphoramidase; AltName: Full=Protein kinase C inhibitor 1; AltName: Full=Protein kinase C-interacting protein 1; Short=PKCI-1	1	1	1	1	0	0	0	1	1	1	0	0	0	1	1	1	0	0	0	1	1	1	11.1	11.1	11.1	13.802	126	126	1	5				0.0045719	By matching	By matching	By matching	By MS/MS	By MS/MS	By MS/MS	0	0	0	11.1
gi|1708596|sp|P54819.2|KAD2_HUMAN	gi|1708596|sp|P54819.2|KAD2_HUMAN	8	8	8	>gi|1708596|sp|P54819.2|KAD2_HUMAN RecName: Full=Adenylate kinase 2, mitochondrial; Short=AK 2; AltName: Full=ATP-AMP transphosphorylase 2; AltName: Full=ATP:AMP phosphotransferase; AltName: Full=Adenylate monophosphate kinase; Contains: RecName: Full=Aden	1	8	8	8	0	0	1	8	6	8	0	0	1	8	6	8	0	0	1	8	6	8	41.8	41.8	41.8	26.477	239	239	1.35	32	1		4	0	By matching	By matching	By matching	By MS/MS	By MS/MS	By MS/MS	0	0	4.2	41.8
gi|1708932|sp|P51948.1|MAT1_HUMAN	gi|1708932|sp|P51948.1|MAT1_HUMAN	2	2	2	>gi|1708932|sp|P51948.1|MAT1_HUMAN RecName: Full=CDK-activating kinase assembly factor MAT1; AltName: Full=CDK7/cyclin-H assembly factor; AltName: Full=Cyclin-G1-interacting protein; AltName: Full=Menage a trois; AltName: Full=RING finger protein 66; AltNa	1	2	2	2	0	0	0	1	2	0	0	0	0	1	2	0	0	0	0	1	2	0	9.4	9.4	9.4	35.823	309	309	1	3				0	By matching	By matching	By matching	By MS/MS	By MS/MS	By matching	0	0	0	4.2
gi|1708967|sp|P40925.4|MDHC_HUMAN	gi|1708967|sp|P40925.4|MDHC_HUMAN	6	6	6	>gi|1708967|sp|P40925.4|MDHC_HUMAN RecName: Full=Malate dehydrogenase, cytoplasmic; AltName: Full=Cytosolic malate dehydrogenase; AltName: Full=Diiodophenylpyruvate reductase	1	6	6	6	1	0	0	5	6	6	1	0	0	5	6	6	1	0	0	5	6	6	22.8	22.8	22.8	36.426	334	334	2	5	17	5		0	By matching	By matching	By matching	By MS/MS	By MS/MS	By MS/MS	4.8	0	0	18.9
gi|1708983|sp|P52888.2|THOP1_HUMAN	gi|1708983|sp|P52888.2|THOP1_HUMAN	12	12	12	>gi|1708983|sp|P52888.2|THOP1_HUMAN RecName: Full=Thimet oligopeptidase; AltName: Full=Endopeptidase 24.15; AltName: Full=MP78	1	12	12	12	1	1	0	11	12	11	1	1	0	11	12	11	1	1	0	11	12	11	24.1	24.1	24.1	78.839	689	689	2.04		47	2		0	By matching	By matching	By matching	By MS/MS	By MS/MS	By MS/MS	1.5	1.2	0	22.2
gi|1709088|sp|P52564.1|MP2K6_HUMAN	gi|1709088|sp|P52564.1|MP2K6_HUMAN	1	1	1	>gi|1709088|sp|P52564.1|MP2K6_HUMAN RecName: Full=Dual specificity mitogen-activated protein kinase kinase 6; Short=MAP kinase kinase 6; Short=MAPKK 6; AltName: Full=MAPK/ERK kinase 6; Short=MEK 6; AltName: Full=Stress-activated protein kinase kinase 3; Sh	1	1	1	1	0	0	0	0	1	1	0	0	0	0	1	1	0	0	0	0	1	1	4.2	4.2	4.2	37.492	334	334	2		2			0.0083599	By matching	By matching	By matching	By matching	By MS/MS	By matching	0	0	0	0
gi|1709337|sp|P55209.1|NP1L1_HUMAN	gi|1709337|sp|P55209.1|NP1L1_HUMAN	6	6	5	>gi|1709337|sp|P55209.1|NP1L1_HUMAN RecName: Full=Nucleosome assembly protein 1-like 1; AltName: Full=NAP-1-related protein; Short=hNRP; Flags: Precursor	1	6	6	5	0	0	0	5	6	6	0	0	0	5	6	6	0	0	0	4	5	5	22.3	22.3	19.7	45.374	391	391	2.83		16	2	11	0	By matching	By matching	By matching	By MS/MS	By MS/MS	By MS/MS	0	0	0	19.2
gi|1709514|sp|P53999.3|TCP4_HUMAN	gi|1709514|sp|P53999.3|TCP4_HUMAN	1	1	1	>gi|1709514|sp|P53999.3|TCP4_HUMAN RecName: Full=Activated RNA polymerase II transcriptional coactivator p15; AltName: Full=Positive cofactor 4; Short=PC4; AltName: Full=SUB1 homolog; AltName: Full=p14	1	1	1	1	0	0	0	1	1	0	0	0	0	1	1	0	0	0	0	1	1	0	15	15	15	14.395	127	127	1	2				0	By matching	By matching	By matching	By MS/MS	By MS/MS	By matching	0	0	0	15
gi|1709543|sp|P24666.3|PPAC_HUMAN	gi|1709543|sp|P24666.3|PPAC_HUMAN	1	1	1	>gi|1709543|sp|P24666.3|PPAC_HUMAN RecName: Full=Low molecular weight phosphotyrosine protein phosphatase; Short=LMW-PTP; Short=LMW-PTPase; AltName: Full=Adipocyte acid phosphatase; AltName: Full=Low molecular weight cytosolic acid phosphatase; AltName: Fu	1	1	1	1	0	0	0	1	0	1	0	0	0	1	0	1	0	0	0	1	0	1	5.7	5.7	5.7	18.042	158	158	1	2				0.009827	By matching	By matching	By matching	By MS/MS	By matching	By matching	0	0	0	5.7
gi|1709658|sp|P53350.1|PLK1_HUMAN	gi|1709658|sp|P53350.1|PLK1_HUMAN	1	1	1	>gi|1709658|sp|P53350.1|PLK1_HUMAN RecName: Full=Serine/threonine-protein kinase PLK1; AltName: Full=Polo-like kinase 1; Short=PLK-1; AltName: Full=Serine/threonine-protein kinase 13; Short=STPK13	1	1	1	1	0	0	0	1	1	1	0	0	0	1	1	1	0	0	0	1	1	1	3.2	3.2	3.2	68.254	603	603	2		3			0.0045891	By matching	By matching	By matching	By MS/MS	By MS/MS	By matching	0	0	0	3.2
gi|1709742|sp|P50336.1|PPOX_HUMAN	gi|1709742|sp|P50336.1|PPOX_HUMAN	1	1	1	>gi|1709742|sp|P50336.1|PPOX_HUMAN RecName: Full=Protoporphyrinogen oxidase; Short=PPO	1	1	1	1	0	0	0	1	1	1	0	0	0	1	1	1	0	0	0	1	1	1	2.5	2.5	2.5	50.765	477	477	4				3	0	By matching	By matching	By matching	By matching	By matching	By MS/MS	0	0	0	2.5
gi|1709744|sp|P53041.1|PPP5_HUMAN	gi|1709744|sp|P53041.1|PPP5_HUMAN	8	8	8	>gi|1709744|sp|P53041.1|PPP5_HUMAN RecName: Full=Serine/threonine-protein phosphatase 5; Short=PP5; AltName: Full=Protein phosphatase T; Short=PP-T; Short=PPT	1	8	8	8	0	0	1	8	7	8	0	0	1	8	7	8	0	0	1	8	7	8	24.4	24.4	24.4	56.878	499	499	2.21	1	28	2	3	0	By matching	By matching	By matching	By MS/MS	By MS/MS	By MS/MS	0	0	3.8	24.4
gi|1709747|sp|P50897.1|PPT1_HUMAN	gi|1709747|sp|P50897.1|PPT1_HUMAN	2	2	2	>gi|1709747|sp|P50897.1|PPT1_HUMAN RecName: Full=Palmitoyl-protein thioesterase 1; Short=PPT-1; AltName: Full=Palmitoyl-protein hydrolase 1; Flags: Precursor	1	2	2	2	0	0	0	2	2	1	0	0	0	2	2	1	0	0	0	2	2	1	10.8	10.8	10.8	34.193	306	306	1	5				0	By matching	By matching	By matching	By matching	By MS/MS	By MS/MS	0	0	0	10.8
gi|1709762|sp|P49721.1|PSB2_HUMAN	gi|1709762|sp|P49721.1|PSB2_HUMAN	3	3	3	>gi|1709762|sp|P49721.1|PSB2_HUMAN RecName: Full=Proteasome subunit beta type-2; AltName: Full=Macropain subunit C7-I; AltName: Full=Multicatalytic endopeptidase complex subunit C7-I; AltName: Full=Proteasome component C7-I	1	3	3	3	0	0	0	2	2	3	0	0	0	2	2	3	0	0	0	2	2	3	17.9	17.9	17.9	22.836	201	201	1	7				0	By matching	By matching	By matching	By MS/MS	By MS/MS	By MS/MS	0	0	0	10.4
gi|1709796|sp|P55036.1|PSMD4_HUMAN	gi|1709796|sp|P55036.1|PSMD4_HUMAN	4	4	3	>gi|1709796|sp|P55036.1|PSMD4_HUMAN RecName: Full=26S proteasome non-ATPase regulatory subunit 4; AltName: Full=26S proteasome regulatory subunit RPN10; AltName: Full=26S proteasome regulatory subunit S5A; AltName: Full=Antisecretory factor 1; Short=AF; Sh	1	4	4	3	1	0	0	4	3	3	1	0	0	4	3	3	0	0	0	3	2	2	20.2	20.2	15.6	40.736	377	377	3.14		8	2	11	0	By matching	By matching	By matching	By MS/MS	By MS/MS	By MS/MS	4.5	0	0	20.2
gi|1709851|sp|P23246.2|SFPQ_HUMAN	gi|1709851|sp|P23246.2|SFPQ_HUMAN	6	6	6	>gi|1709851|sp|P23246.2|SFPQ_HUMAN RecName: Full=Splicing factor, proline- and glutamine-rich; AltName: Full=100 kDa DNA-pairing protein; Short=hPOMp100; AltName: Full=DNA-binding p52/p100 complex, 100 kDa subunit; AltName: Full=Polypyrimidine tract-bindin	1	6	6	6	1	1	4	5	6	5	1	1	4	5	6	5	1	1	4	5	6	5	12.6	12.6	12.6	76.149	707	707	2.37	3	18	17		0	By MS/MS	By MS/MS	By matching	By MS/MS	By MS/MS	By MS/MS	2.1	2.1	7.8	10.2
gi|1709947|sp|P11498.2|PYC_HUMAN	gi|1709947|sp|P11498.2|PYC_HUMAN	3	3	3	>gi|1709947|sp|P11498.2|PYC_HUMAN RecName: Full=Pyruvate carboxylase, mitochondrial; AltName: Full=Pyruvic carboxylase; Short=PCB; Flags: Precursor	1	3	3	3	0	0	0	3	3	3	0	0	0	3	3	3	0	0	0	3	3	3	3.3	3.3	3.3	129.63	1178	1178	2.9		1	9		0	By matching	By matching	By matching	By MS/MS	By MS/MS	By MS/MS	0	0	0	3.3
gi|1709999|sp|P51149.1|RAB7A_HUMAN	gi|1709999|sp|P51149.1|RAB7A_HUMAN	6	6	6	>gi|1709999|sp|P51149.1|RAB7A_HUMAN RecName: Full=Ras-related protein Rab-7a	1	6	6	6	0	1	1	6	5	6	0	1	1	6	5	6	0	1	1	6	5	6	36.7	36.7	36.7	23.489	207	207	2.27	19	2	3	13	0	By matching	By matching	By matching	By MS/MS	By MS/MS	By MS/MS	0	5.3	4.8	36.7
gi|1710003|sp|P51151.1|RAB9A_HUMAN;gi|13124471|sp|Q9NP90.1|RAB9B_HUMAN	gi|1710003|sp|P51151.1|RAB9A_HUMAN;gi|13124471|sp|Q9NP90.1|RAB9B_HUMAN	2;1	2;1	2;1	>gi|1710003|sp|P51151.1|RAB9A_HUMAN RecName: Full=Ras-related protein Rab-9A;>gi|13124471|sp|Q9NP90.1|RAB9B_HUMAN RecName: Full=Ras-related protein Rab-9B; AltName: Full=Rab-9-like protein; Short=Rab-9L	2	2	2	2	0	0	0	2	2	2	0	0	0	2	2	2	0	0	0	2	2	2	12.4	12.4	12.4	22.837	201	201;201	2.33	5	1	3	3	0	By matching	By matching	By matching	By MS/MS	By MS/MS	By MS/MS	0	0	0	12.4
gi|1710016|sp|P51153.1|RAB13_HUMAN	gi|1710016|sp|P51153.1|RAB13_HUMAN	2	1	1	>gi|1710016|sp|P51153.1|RAB13_HUMAN RecName: Full=Ras-related protein Rab-13; AltName: Full=Cell growth-inhibiting gene 4 protein; Flags: Precursor	1	2	1	1	0	0	0	2	2	2	0	0	0	1	1	1	0	0	0	1	1	1	12.3	6.9	6.9	22.774	203	203	1	3				0.0057589	By matching	By matching	By matching	By MS/MS	By MS/MS	By MS/MS	0	0	0	12.3
gi|1710628|sp|P52597.3|HNRPF_HUMAN	gi|1710628|sp|P52597.3|HNRPF_HUMAN	7	5	5	>gi|1710628|sp|P52597.3|HNRPF_HUMAN RecName: Full=Heterogeneous nuclear ribonucleoprotein F; Short=hnRNP F; AltName: Full=Nucleolin-like protein mcs94-1; Contains: RecName: Full=Heterogeneous nuclear ribonucleoprotein F, N-terminally processed	1	7	5	5	2	1	1	7	7	7	2	0	1	5	5	5	2	0	1	5	5	5	29.2	22.7	22.7	45.671	415	415	2.47	5	27	12	9	0	By matching	By matching	By MS/MS	By MS/MS	By MS/MS	By MS/MS	7	4.1	3.9	29.2
gi|1710632|sp|P31943.4|HNRH1_HUMAN	gi|1710632|sp|P31943.4|HNRH1_HUMAN	14	14	9	>gi|1710632|sp|P31943.4|HNRH1_HUMAN RecName: Full=Heterogeneous nuclear ribonucleoprotein H; Short=hnRNP H; Contains: RecName: Full=Heterogeneous nuclear ribonucleoprotein H, N-terminally processed	1	14	14	9	2	4	2	13	14	14	2	4	2	13	14	14	0	0	0	8	9	9	48.1	48.1	31.8	49.229	449	449	3.07	7	34	24	56	0	By MS/MS	By MS/MS	By MS/MS	By MS/MS	By MS/MS	By MS/MS	6.7	14	7.3	43.7
gi|1710756|sp|P15880.2|RS2_HUMAN	gi|1710756|sp|P15880.2|RS2_HUMAN	11	11	11	>gi|1710756|sp|P15880.2|RS2_HUMAN RecName: Full=40S ribosomal protein S2; AltName: Full=40S ribosomal protein S4; AltName: Full=Protein LLRep3	1	11	11	11	0	1	3	11	11	11	0	1	3	11	11	11	0	1	3	11	11	11	37.9	37.9	37.9	31.324	293	293	1.47	49	12	6	3	0	By matching	By matching	By MS/MS	By MS/MS	By MS/MS	By MS/MS	0	3.8	11.6	37.9
gi|1711550|sp|P51571.1|SSRD_HUMAN	gi|1711550|sp|P51571.1|SSRD_HUMAN	2	2	2	>gi|1711550|sp|P51571.1|SSRD_HUMAN RecName: Full=Translocon-associated protein subunit delta; Short=TRAP-delta; AltName: Full=Signal sequence receptor subunit delta; Short=SSR-delta; Flags: Precursor	1	2	2	2	0	0	0	2	2	2	0	0	0	2	2	2	0	0	0	2	2	2	13.9	13.9	13.9	18.998	173	173	1	6				0	By matching	By matching	By matching	By MS/MS	By MS/MS	By matching	0	0	0	13.9
gi|1717869|sp|P45974.2|UBP5_HUMAN;gi|209572692|sp|Q92995.2|UBP13_HUMAN	gi|1717869|sp|P45974.2|UBP5_HUMAN	18;1	18;1	18;1	>gi|1717869|sp|P45974.2|UBP5_HUMAN RecName: Full=Ubiquitin carboxyl-terminal hydrolase 5; AltName: Full=Deubiquitinating enzyme 5; AltName: Full=Isopeptidase T; AltName: Full=Ubiquitin thioesterase 5; AltName: Full=Ubiquitin-specific-processing protease 5	2	18	18	18	0	1	3	15	17	16	0	1	3	15	17	16	0	1	3	15	17	16	32.5	32.5	32.5	95.785	858	858;863	2.76	4	11	60	1	0	By matching	By matching	By MS/MS	By MS/MS	By MS/MS	By MS/MS	0	1.4	5.8	25.4
gi|1718024|sp|P30041.3|PRDX6_HUMAN	gi|1718024|sp|P30041.3|PRDX6_HUMAN	16	16	16	>gi|1718024|sp|P30041.3|PRDX6_HUMAN RecName: Full=Peroxiredoxin-6; AltName: Full=1-Cys peroxiredoxin; Short=1-Cys PRX; AltName: Full=24 kDa protein; AltName: Full=Acidic calcium-independent phospholipase A2; Short=aiPLA2; AltName: Full=Antioxidant protein	1	16	16	16	0	1	3	14	15	14	0	1	3	14	15	14	0	1	3	14	15	14	76.3	76.3	76.3	25.035	224	224	2.93	28	3	2	53	0	By matching	By MS/MS	By MS/MS	By MS/MS	By MS/MS	By MS/MS	0	9.4	19.6	64.7
gi|1718079|sp|P50552.3|VASP_HUMAN	gi|1718079|sp|P50552.3|VASP_HUMAN	1	1	1	>gi|1718079|sp|P50552.3|VASP_HUMAN RecName: Full=Vasodilator-stimulated phosphoprotein; Short=VASP	1	1	1	1	0	0	0	1	1	1	0	0	0	1	1	1	0	0	0	1	1	1	4.2	4.2	4.2	39.829	380	380	2		4			1	By matching	By matching	By matching	By matching	By MS/MS	By MS/MS	0	0	0	4.2
gi|1718191|sp|P51452.1|DUS3_HUMAN	gi|1718191|sp|P51452.1|DUS3_HUMAN	4	4	4	>gi|1718191|sp|P51452.1|DUS3_HUMAN RecName: Full=Dual specificity protein phosphatase 3; AltName: Full=Dual specificity protein phosphatase VHR; AltName: Full=Vaccinia H1-related phosphatase; Short=VHR	1	4	4	4	0	0	0	4	3	3	0	0	0	4	3	3	0	0	0	4	3	3	28.6	28.6	28.6	20.478	185	185	1	13				0	By matching	By matching	By matching	By MS/MS	By MS/MS	By MS/MS	0	0	0	28.6
gi|172045930|sp|Q9HCE5.2|MET14_HUMAN	gi|172045930|sp|Q9HCE5.2|MET14_HUMAN	1	1	1	>gi|172045930|sp|Q9HCE5.2|MET14_HUMAN RecName: Full=N6-adenosine-methyltransferase subunit METTL14; AltName: Full=Methyltransferase-like protein 14	1	1	1	1	0	0	0	1	0	1	0	0	0	1	0	1	0	0	0	1	0	1	5.7	5.7	5.7	52.15	456	456	2		2			0	By matching	By matching	By matching	By MS/MS	By matching	By MS/MS	0	0	0	5.7
gi|172046137|sp|Q6L8Q7.2|PDE12_HUMAN	gi|172046137|sp|Q6L8Q7.2|PDE12_HUMAN	7	7	7	>gi|172046137|sp|Q6L8Q7.2|PDE12_HUMAN RecName: Full=2,5-phosphodiesterase 12; Short=2-PDE; Short=2-PDE; AltName: Full=Mitochondrial deadenylase; Flags: Precursor	1	7	7	7	0	1	0	7	7	5	0	1	0	7	7	5	0	1	0	7	7	5	17.2	17.2	17.2	67.351	609	609	1.95	1	21			0	By matching	By matching	By matching	By MS/MS	By MS/MS	By MS/MS	0	1.8	0	17.2
gi|172046183|sp|Q6ZSR9.2|YJ005_HUMAN	gi|172046183|sp|Q6ZSR9.2|YJ005_HUMAN	2	2	2	>gi|172046183|sp|Q6ZSR9.2|YJ005_HUMAN RecName: Full=Uncharacterized protein FLJ45252	1	2	2	2	0	0	0	2	2	2	0	0	0	2	2	2	0	0	0	2	2	2	9.6	9.6	9.6	37.976	355	355	3			6		0	By matching	By matching	By matching	By MS/MS	By MS/MS	By matching	0	0	0	9.6
gi|172046234|sp|Q9C0F0.3|ASXL3_HUMAN	gi|172046234|sp|Q9C0F0.3|ASXL3_HUMAN	1	1	1	>gi|172046234|sp|Q9C0F0.3|ASXL3_HUMAN RecName: Full=Putative Polycomb group protein ASXL3; AltName: Full=Additional sex combs-like protein 3	1	1	1	1	0	0	0	0	0	1	0	0	0	0	0	1	0	0	0	0	0	1	0.5	0.5	0.5	241.92	2248	2248	2		1			1	By matching	By matching	By matching	By matching	By matching	By MS/MS	0	0	0	0
gi|172046253|sp|Q16881.3|TRXR1_HUMAN	gi|172046253|sp|Q16881.3|TRXR1_HUMAN	5	5	5	>gi|172046253|sp|Q16881.3|TRXR1_HUMAN RecName: Full=Thioredoxin reductase 1, cytoplasmic; Short=TR; AltName: Full=Gene associated with retinoic and interferon-induced mortality 12 protein; Short=GRIM-12; Short=Gene associated with retinoic and IFN-induced	1	5	5	5	0	0	0	4	5	3	0	0	0	4	5	3	0	0	0	4	5	3	16.2	16.2	16.2	70.905	649	649	2.78		10	2	6	0	By matching	By matching	By matching	By MS/MS	By MS/MS	By MS/MS	0	0	0	10.6
gi|172046825|sp|Q562R1.2|ACTBL_HUMAN	gi|172046825|sp|Q562R1.2|ACTBL_HUMAN	5	1	1	>gi|172046825|sp|Q562R1.2|ACTBL_HUMAN RecName: Full=Beta-actin-like protein 2; AltName: Full=Kappa-actin	1	5	1	1	2	1	4	5	4	3	0	0	1	1	1	0	0	0	1	1	1	0	15.7	4.8	4.8	42.003	376	376	1.67	3	2	1		0	By matching	By matching	By matching	By matching	By MS/MS	By matching	8	4.3	15.7	15.7
gi|172046859|sp|Q14C86.2|GAPD1_HUMAN	gi|172046859|sp|Q14C86.2|GAPD1_HUMAN	21	21	21	>gi|172046859|sp|Q14C86.2|GAPD1_HUMAN RecName: Full=GTPase-activating protein and VPS9 domain-containing protein 1; AltName: Full=GAPex-5; AltName: Full=Rab5-activating protein 6	1	21	21	21	0	0	0	19	18	19	0	0	0	19	18	19	0	0	0	19	18	19	20.6	20.6	20.6	164.98	1478	1478	3		2	63	2	0	By matching	By matching	By matching	By MS/MS	By MS/MS	By MS/MS	0	0	0	19.1
gi|172048116|sp|A8MXV4.1|NUD19_HUMAN	gi|172048116|sp|A8MXV4.1|NUD19_HUMAN	2	2	2	>gi|172048116|sp|A8MXV4.1|NUD19_HUMAN RecName: Full=Nucleoside diphosphate-linked moiety X motif 19; Short=Nudix motif 19	1	2	2	2	0	0	0	1	2	2	0	0	0	1	2	2	0	0	0	1	2	2	5.9	5.9	5.9	42.233	375	375	1.67	2	4			0	By matching	By matching	By matching	By MS/MS	By MS/MS	By MS/MS	0	0	0	2.7
gi|1723117|sp|P50748.1|KNTC1_HUMAN	gi|1723117|sp|P50748.1|KNTC1_HUMAN	4	4	4	>gi|1723117|sp|P50748.1|KNTC1_HUMAN RecName: Full=Kinetochore-associated protein 1; AltName: Full=Rough deal homolog; Short=HsROD; Short=Rod; Short=hRod	1	4	4	4	0	0	0	4	3	3	0	0	0	4	3	3	0	0	0	4	3	3	2.4	2.4	2.4	250.75	2209	2209	3			10		0	By matching	By matching	By matching	By MS/MS	By MS/MS	By MS/MS	0	0	0	2.4
gi|1729927|sp|P54578.3|UBP14_HUMAN	gi|1729927|sp|P54578.3|UBP14_HUMAN	5	5	5	>gi|1729927|sp|P54578.3|UBP14_HUMAN RecName: Full=Ubiquitin carboxyl-terminal hydrolase 14; AltName: Full=Deubiquitinating enzyme 14; AltName: Full=Ubiquitin thioesterase 14; AltName: Full=Ubiquitin-specific-processing protease 14	1	5	5	5	0	0	0	5	5	5	0	0	0	5	5	5	0	0	0	5	5	5	15.2	15.2	15.2	56.068	494	494	2.11		17	2		0	By matching	By matching	By matching	By MS/MS	By MS/MS	By MS/MS	0	0	0	15.2
gi|1729976|sp|P29401.3|TKT_HUMAN	gi|1729976|sp|P29401.3|TKT_HUMAN	10	10	10	>gi|1729976|sp|P29401.3|TKT_HUMAN RecName: Full=Transketolase; Short=TK	1	10	10	10	1	0	1	9	10	8	1	0	1	9	10	8	1	0	1	9	10	8	29.7	29.7	29.7	67.877	623	623	2.05		41	2		0	By matching	By matching	By matching	By MS/MS	By MS/MS	By MS/MS	2.9	0	2.9	26.8
gi|1730006|sp|P51580.1|TPMT_HUMAN	gi|1730006|sp|P51580.1|TPMT_HUMAN	1	1	1	>gi|1730006|sp|P51580.1|TPMT_HUMAN RecName: Full=Thiopurine S-methyltransferase; AltName: Full=Thiopurine methyltransferase	1	1	1	1	0	0	0	0	0	1	0	0	0	0	0	1	0	0	0	0	0	1	7.3	7.3	7.3	28.18	245	245	3			1		0.0079936	By matching	By matching	By matching	By matching	By matching	By MS/MS	0	0	0	0
gi|1730070|sp|P51812.1|KS6A3_HUMAN	gi|1730070|sp|P51812.1|KS6A3_HUMAN	3	3	3	>gi|1730070|sp|P51812.1|KS6A3_HUMAN RecName: Full=Ribosomal protein S6 kinase alpha-3; Short=S6K-alpha-3; AltName: Full=90 kDa ribosomal protein S6 kinase 3; Short=p90-RSK 3; Short=p90RSK3; AltName: Full=Insulin-stimulated protein kinase 1; Short=ISPK-1; A	1	3	3	3	0	0	0	2	3	3	0	0	0	2	3	3	0	0	0	2	3	3	5.3	5.3	5.3	83.735	740	740	2		9			0	By matching	By matching	By matching	By MS/MS	By MS/MS	By MS/MS	0	0	0	3.6
gi|1730092|sp|P55210.1|CASP7_HUMAN	gi|1730092|sp|P55210.1|CASP7_HUMAN	3	3	3	>gi|1730092|sp|P55210.1|CASP7_HUMAN RecName: Full=Caspase-7; Short=CASP-7; AltName: Full=Apoptotic protease Mch-3; AltName: Full=CMH-1; AltName: Full=ICE-like apoptotic protease 3; Short=ICE-LAP3; Contains: RecName: Full=Caspase-7 subunit p20; Contains: Re	1	3	3	3	0	0	0	3	3	2	0	0	0	3	3	2	0	0	0	3	3	2	15.5	15.5	15.5	34.276	303	303	1	11				0	By matching	By matching	By matching	By MS/MS	By MS/MS	By MS/MS	0	0	0	15.5
gi|1730117|sp|P07954.3|FUMH_HUMAN	gi|1730117|sp|P07954.3|FUMH_HUMAN	3	3	3	>gi|1730117|sp|P07954.3|FUMH_HUMAN RecName: Full=Fumarate hydratase, mitochondrial; Short=Fumarase; Flags: Precursor	1	3	3	3	1	0	1	3	3	2	1	0	1	3	3	2	1	0	1	3	3	2	8.6	8.6	8.6	54.636	510	510	3.06	1	4	4	7	0	By matching	By matching	By MS/MS	By MS/MS	By MS/MS	By MS/MS	2.7	0	2.7	8.6
gi|1730187|sp|P51570.1|GALK1_HUMAN	gi|1730187|sp|P51570.1|GALK1_HUMAN	6	6	6	>gi|1730187|sp|P51570.1|GALK1_HUMAN RecName: Full=Galactokinase; AltName: Full=Galactose kinase	1	6	6	6	0	0	0	6	6	6	0	0	0	6	6	6	0	0	0	6	6	6	21.7	21.7	21.7	42.272	392	392	2.05		18	1		0	By matching	By matching	By matching	By MS/MS	By MS/MS	By MS/MS	0	0	0	21.7
gi|1730573|sp|Q01970.2|PLCB3_HUMAN	gi|1730573|sp|Q01970.2|PLCB3_HUMAN	5	5	5	>gi|1730573|sp|Q01970.2|PLCB3_HUMAN RecName: Full=1-phosphatidylinositol 4,5-bisphosphate phosphodiesterase beta-3; AltName: Full=Phosphoinositide phospholipase C-beta-3; AltName: Full=Phospholipase C-beta-3; Short=PLC-beta-3	1	5	5	5	0	0	0	4	3	5	0	0	0	4	3	5	0	0	0	4	3	5	6.6	6.6	6.6	138.8	1234	1234	3			12		0	By matching	By matching	By matching	By MS/MS	By MS/MS	By MS/MS	0	0	0	5.6
gi|17366828|sp|Q9H1Y0.2|ATG5_HUMAN	gi|17366828|sp|Q9H1Y0.2|ATG5_HUMAN	3	3	3	>gi|17366828|sp|Q9H1Y0.2|ATG5_HUMAN RecName: Full=Autophagy protein 5; AltName: Full=APG5-like; AltName: Full=Apoptosis-specific protein	1	3	3	3	1	0	0	2	2	3	1	0	0	2	2	3	1	0	0	2	2	3	14.2	14.2	14.2	32.447	275	275	4				8	0	By matching	By matching	By matching	By MS/MS	By MS/MS	By MS/MS	5.5	0	0	9.5
gi|17367145|sp|Q9ULA0.1|DNPEP_HUMAN	gi|17367145|sp|Q9ULA0.1|DNPEP_HUMAN	6	6	6	>gi|17367145|sp|Q9ULA0.1|DNPEP_HUMAN RecName: Full=Aspartyl aminopeptidase	1	6	6	6	0	0	0	5	5	6	0	0	0	5	5	6	0	0	0	5	5	6	19.8	19.8	19.8	52.428	475	475	3.81			3	13	0	By matching	By matching	By matching	By MS/MS	By MS/MS	By MS/MS	0	0	0	16.8
gi|17368715|sp|Q9BZH6.1|WDR11_HUMAN	gi|17368715|sp|Q9BZH6.1|WDR11_HUMAN	2	2	2	>gi|17368715|sp|Q9BZH6.1|WDR11_HUMAN RecName: Full=WD repeat-containing protein 11; AltName: Full=Bromodomain and WD repeat-containing protein 2; AltName: Full=WD repeat-containing protein 15	1	2	2	2	0	0	0	2	2	2	0	0	0	2	2	2	0	0	0	2	2	2	2	2	2	136.68	1224	1224	3			6		0	By matching	By matching	By matching	By MS/MS	By MS/MS	By MS/MS	0	0	0	2
gi|17369290|sp|Q9NQC3.2|RTN4_HUMAN	gi|17369290|sp|Q9NQC3.2|RTN4_HUMAN	1	1	1	>gi|17369290|sp|Q9NQC3.2|RTN4_HUMAN RecName: Full=Reticulon-4; AltName: Full=Foocen; AltName: Full=Neurite outgrowth inhibitor; Short=Nogo protein; AltName: Full=Neuroendocrine-specific protein; Short=NSP; AltName: Full=Neuroendocrine-specific protein C ho	1	1	1	1	0	0	0	1	1	0	0	0	0	1	1	0	0	0	0	1	1	0	2.9	2.9	2.9	129.93	1192	1192	2		2			0	By matching	By matching	By matching	By MS/MS	By matching	By matching	0	0	0	2.9
gi|17369347|sp|Q9P2W9.1|STX18_HUMAN	gi|17369347|sp|Q9P2W9.1|STX18_HUMAN	1	1	1	>gi|17369347|sp|Q9P2W9.1|STX18_HUMAN RecName: Full=Syntaxin-18; AltName: Full=Cell growth-inhibiting gene 9 protein	1	1	1	1	0	0	0	1	1	1	0	0	0	1	1	1	0	0	0	1	1	1	6.3	6.3	6.3	38.673	335	335	2.25		3	1		0.00045208	By matching	By matching	By matching	By MS/MS	By MS/MS	By matching	0	0	0	6.3
gi|17369686|sp|Q9UIA9.3|XPO7_HUMAN	gi|17369686|sp|Q9UIA9.3|XPO7_HUMAN	7	7	7	>gi|17369686|sp|Q9UIA9.3|XPO7_HUMAN RecName: Full=Exportin-7; Short=Exp7; AltName: Full=Ran-binding protein 16	1	7	7	7	0	1	1	5	6	6	0	1	1	5	6	6	0	1	1	5	6	6	8.6	8.6	8.6	123.91	1087	1087	3			21		0	By matching	By matching	By matching	By MS/MS	By MS/MS	By MS/MS	0	0.8	1.4	5.9
gi|17372671|sp|Q9UBB4.1|ATX10_HUMAN	gi|17372671|sp|Q9UBB4.1|ATX10_HUMAN	8	8	8	>gi|17372671|sp|Q9UBB4.1|ATX10_HUMAN RecName: Full=Ataxin-10; AltName: Full=Brain protein E46 homolog; AltName: Full=Spinocerebellar ataxia type 10 protein	1	8	8	8	0	0	0	7	8	8	0	0	0	7	8	8	0	0	0	7	8	8	24.6	24.6	24.6	53.488	475	475	3.5	1	6		23	0	By matching	By matching	By matching	By MS/MS	By MS/MS	By MS/MS	0	0	0	21.1
gi|17375490|sp|Q14203.3|DCTN1_HUMAN	gi|17375490|sp|Q14203.3|DCTN1_HUMAN	27	27	27	>gi|17375490|sp|Q14203.3|DCTN1_HUMAN RecName: Full=Dynactin subunit 1; AltName: Full=150 kDa dynein-associated polypeptide; AltName: Full=DAP-150; Short=DP-150; AltName: Full=p135; AltName: Full=p150-glued	1	27	27	27	3	2	3	24	24	25	3	2	3	24	24	25	3	2	3	24	24	25	29.7	29.7	29.7	141.69	1278	1278	2.92	4	3	86	3	0	By MS/MS	By MS/MS	By MS/MS	By MS/MS	By MS/MS	By MS/MS	2.3	2.3	2.6	25.4
gi|17375734|sp|O14976.2|GAK_HUMAN	gi|17375734|sp|O14976.2|GAK_HUMAN	3	3	3	>gi|17375734|sp|O14976.2|GAK_HUMAN RecName: Full=Cyclin-G-associated kinase	1	3	3	3	0	1	0	3	2	2	0	1	0	3	2	2	0	1	0	3	2	2	2.2	2.2	2.2	143.19	1311	1311	3			8		0	By matching	By matching	By matching	By MS/MS	By MS/MS	By MS/MS	0	0.8	0	2.2
gi|17376879|sp|O43464.2|HTRA2_HUMAN	gi|17376879|sp|O43464.2|HTRA2_HUMAN	3	3	3	>gi|17376879|sp|O43464.2|HTRA2_HUMAN RecName: Full=Serine protease HTRA2, mitochondrial; AltName: Full=High temperature requirement protein A2; Short=HtrA2; AltName: Full=Omi stress-regulated endoprotease; AltName: Full=Serine protease 25; AltName: Full=Se	1	3	3	3	0	0	0	3	3	2	0	0	0	3	3	2	0	0	0	3	3	2	10	10	10	48.84	458	458	1.67	5	6	1		0	By matching	By matching	By matching	By MS/MS	By MS/MS	By MS/MS	0	0	0	10
gi|17378996|sp|O43324.1|MCA3_HUMAN	gi|17378996|sp|O43324.1|MCA3_HUMAN	2	2	2	>gi|17378996|sp|O43324.1|MCA3_HUMAN RecName: Full=Eukaryotic translation elongation factor 1 epsilon-1; AltName: Full=Aminoacyl tRNA synthetase complex-interacting multifunctional protein 3; AltName: Full=Elongation factor p18; AltName: Full=Multisynthase	1	2	2	2	0	0	0	2	2	2	0	0	0	2	2	2	0	0	0	2	2	2	12.1	12.1	12.1	19.81	174	174	1	9				0	By matching	By matching	By matching	By MS/MS	By MS/MS	By MS/MS	0	0	0	12.1
gi|17380133|sp|O75323.1|NIPS2_HUMAN	gi|17380133|sp|O75323.1|NIPS2_HUMAN	1	1	1	>gi|17380133|sp|O75323.1|NIPS2_HUMAN RecName: Full=Protein NipSnap homolog 2; Short=NipSnap2; AltName: Full=Glioblastoma-amplified sequence	1	1	1	1	0	0	1	1	1	1	0	0	1	1	1	1	0	0	1	1	1	1	3.1	3.1	3.1	33.742	286	286	1	4				0.0068966	By matching	By matching	By matching	By matching	By MS/MS	By MS/MS	0	0	3.1	3.1
gi|17380137|sp|P49959.3|MRE11_HUMAN	gi|17380137|sp|P49959.3|MRE11_HUMAN	2	2	2	>gi|17380137|sp|P49959.3|MRE11_HUMAN RecName: Full=Double-strand break repair protein MRE11A; AltName: Full=Meiotic recombination 11 homolog 1; Short=MRE11 homolog 1; AltName: Full=Meiotic recombination 11 homolog A; Short=MRE11 homolog A	1	2	2	2	0	0	0	2	1	2	0	0	0	2	1	2	0	0	0	2	1	2	3.2	3.2	3.2	80.592	708	708	2		5			0	By matching	By matching	By matching	By MS/MS	By MS/MS	By MS/MS	0	0	0	3.2
gi|17380144|sp|Q9BPW8.1|NIPS1_HUMAN	gi|17380144|sp|Q9BPW8.1|NIPS1_HUMAN	2	2	2	>gi|17380144|sp|Q9BPW8.1|NIPS1_HUMAN RecName: Full=Protein NipSnap homolog 1; Short=NipSnap1	1	2	2	2	0	0	0	2	2	2	0	0	0	2	2	2	0	0	0	2	2	2	8.1	8.1	8.1	33.31	284	284	1.58	8	1	3		0	By matching	By matching	By matching	By MS/MS	By MS/MS	By MS/MS	0	0	0	8.1
gi|17380153|sp|Q9UNF1.2|MAGD2_HUMAN	gi|17380153|sp|Q9UNF1.2|MAGD2_HUMAN	9	9	9	>gi|17380153|sp|Q9UNF1.2|MAGD2_HUMAN RecName: Full=Melanoma-associated antigen D2; AltName: Full=11B6; AltName: Full=Breast cancer-associated gene 1 protein; Short=BCG-1; AltName: Full=Hepatocellular carcinoma-associated protein JCL-1; AltName: Full=MAGE-D	1	9	9	9	2	4	0	9	9	8	2	4	0	9	9	8	2	4	0	9	9	8	22.1	22.1	22.1	64.953	606	606	2.15	1	37	8		0	By matching	By MS/MS	By matching	By MS/MS	By MS/MS	By MS/MS	5.4	12.7	0	22.1
gi|17380155|sp|Q9Y2X3.1|NOP58_HUMAN	gi|17380155|sp|Q9Y2X3.1|NOP58_HUMAN	1	1	1	>gi|17380155|sp|Q9Y2X3.1|NOP58_HUMAN RecName: Full=Nucleolar protein 58; AltName: Full=Nucleolar protein 5	1	1	1	1	0	0	0	1	1	0	0	0	0	1	1	0	0	0	0	1	1	0	3.2	3.2	3.2	59.578	529	529	2.33		2	1		0	By matching	By matching	By matching	By MS/MS	By MS/MS	By matching	0	0	0	3.2
gi|17380263|sp|Q99436.1|PSB7_HUMAN	gi|17380263|sp|Q99436.1|PSB7_HUMAN	3	3	3	>gi|17380263|sp|Q99436.1|PSB7_HUMAN RecName: Full=Proteasome subunit beta type-7; AltName: Full=Macropain chain Z; AltName: Full=Multicatalytic endopeptidase complex chain Z; AltName: Full=Proteasome subunit Z; Flags: Precursor	1	3	3	3	1	0	1	3	3	3	1	0	1	3	3	3	1	0	1	3	3	3	14.4	14.4	14.4	29.965	277	277	1.56	13			3	0	By matching	By matching	By matching	By MS/MS	By MS/MS	By matching	3.6	0	3.6	14.4
gi|17380291|sp|Q92900.2|RENT1_HUMAN	gi|17380291|sp|Q92900.2|RENT1_HUMAN	21	21	21	>gi|17380291|sp|Q92900.2|RENT1_HUMAN RecName: Full=Regulator of nonsense transcripts 1; AltName: Full=ATP-dependent helicase RENT1; AltName: Full=Nonsense mRNA reducing factor 1; Short=NORF1; AltName: Full=Up-frameshift suppressor 1 homolog; Short=hUpf1	1	21	21	21	1	3	2	17	20	19	1	3	2	17	20	19	1	3	2	17	20	19	23.7	23.7	23.7	124.34	1129	1129	2.99		1	71		0	By MS/MS	By MS/MS	By MS/MS	By MS/MS	By MS/MS	By MS/MS	0.9	3.3	1.9	19.6
gi|17380310|sp|Q12874.1|SF3A3_HUMAN	gi|17380310|sp|Q12874.1|SF3A3_HUMAN	6	6	6	>gi|17380310|sp|Q12874.1|SF3A3_HUMAN RecName: Full=Splicing factor 3A subunit 3; AltName: Full=SF3a60; AltName: Full=Spliceosome-associated protein 61; Short=SAP 61	1	6	6	6	0	0	1	6	5	6	0	0	1	6	5	6	0	0	1	6	5	6	13.2	13.2	13.2	58.848	501	501	1.96	2	20	1		0	By matching	By matching	By matching	By MS/MS	By MS/MS	By MS/MS	0	0	1.8	13.2
gi|17380320|sp|Q9UGI8.1|TES_HUMAN	gi|17380320|sp|Q9UGI8.1|TES_HUMAN	3	3	3	>gi|17380320|sp|Q9UGI8.1|TES_HUMAN RecName: Full=Testin; AltName: Full=TESS	1	3	3	3	1	1	1	3	2	3	1	1	1	3	2	3	1	1	1	3	2	3	9.5	9.5	9.5	47.996	421	421	2.36	4	5	1	4	0	By matching	By matching	By matching	By MS/MS	By MS/MS	By MS/MS	3.3	3.3	3.3	9.5
gi|17380385|sp|P06744.4|G6PI_HUMAN;CON__Q3ZBD7	gi|17380385|sp|P06744.4|G6PI_HUMAN	11;4	11;4	11;4	>gi|17380385|sp|P06744.4|G6PI_HUMAN RecName: Full=Glucose-6-phosphate isomerase; Short=GPI; AltName: Full=Autocrine motility factor; Short=AMF; AltName: Full=Neuroleukin; Short=NLK; AltName: Full=Phosphoglucose isomerase; Short=PGI; AltName: Full=Phosphohe	2	11	11	11	0	0	1	9	11	9	0	0	1	9	11	9	0	0	1	9	11	9	33.2	33.2	33.2	63.146	558	558;557	2.07	1	40	4		0	By matching	By matching	By matching	By MS/MS	By MS/MS	By MS/MS	0	0	1.3	22.4
gi|17380569|sp|Q13596.3|SNX1_HUMAN	gi|17380569|sp|Q13596.3|SNX1_HUMAN	4	4	3	>gi|17380569|sp|Q13596.3|SNX1_HUMAN RecName: Full=Sorting nexin-1	1	4	4	3	0	0	0	3	4	4	0	0	0	3	4	4	0	0	0	3	3	3	10	10	7.9	59.069	522	522	2	1	11	1		0	By matching	By matching	By matching	By MS/MS	By MS/MS	By MS/MS	0	0	0	7.9
gi|17432978|sp|O43491.1|E41L2_HUMAN	gi|17432978|sp|O43491.1|E41L2_HUMAN	16	16	16	>gi|17432978|sp|O43491.1|E41L2_HUMAN RecName: Full=Band 4.1-like protein 2; AltName: Full=Generally expressed protein 4.1; Short=4.1G	1	16	16	16	0	0	1	14	13	14	0	0	1	14	13	14	0	0	1	14	13	14	27.5	27.5	27.5	112.59	1005	1005	2.92		4	44		0	By matching	By matching	By matching	By MS/MS	By MS/MS	By MS/MS	0	0	1.2	22.7
gi|17433099|sp|Q9Y2J2.2|E41L3_HUMAN	gi|17433099|sp|Q9Y2J2.2|E41L3_HUMAN	7	7	7	>gi|17433099|sp|Q9Y2J2.2|E41L3_HUMAN RecName: Full=Band 4.1-like protein 3; AltName: Full=4.1B; AltName: Full=Differentially expressed in adenocarcinoma of the lung protein 1; Short=DAL-1; Contains: RecName: Full=Band 4.1-like protein 3, N-terminally proce	1	7	7	7	1	1	1	6	7	5	1	1	1	6	7	5	1	1	1	6	7	5	9	9	9	120.68	1087	1087	2.69		9	20		0	By matching	By matching	By matching	By MS/MS	By MS/MS	By MS/MS	1.2	1.2	1.2	7.9
gi|17433306|sp|Q9NY91.1|SC5A4_HUMAN	gi|17433306|sp|Q9NY91.1|SC5A4_HUMAN	1	1	1	>gi|17433306|sp|Q9NY91.1|SC5A4_HUMAN RecName: Full=Low affinity sodium-glucose cotransporter; AltName: Full=Sodium/glucose cotransporter 3; Short=Na(+)/glucose cotransporter 3; AltName: Full=Solute carrier family 5 member 4	1	1	1	1	1	1	1	1	1	1	1	1	1	1	1	1	1	1	1	1	1	1	2.3	2.3	2.3	72.455	659	659	4				14	0.0098619	By matching	By MS/MS	By matching	By matching	By MS/MS	By matching	2.3	2.3	2.3	2.3
gi|17865459|sp|P78347.2|GTF2I_HUMAN	gi|17865459|sp|P78347.2|GTF2I_HUMAN	12	12	12	>gi|17865459|sp|P78347.2|GTF2I_HUMAN RecName: Full=General transcription factor II-I; Short=GTFII-I; Short=TFII-I; AltName: Full=Bruton tyrosine kinase-associated protein 135; Short=BAP-135; Short=BTK-associated protein 135; AltName: Full=SRF-Phox1-interac	1	12	12	12	2	4	0	9	12	10	2	4	0	9	12	10	2	4	0	9	12	10	16.7	16.7	16.7	112.42	998	998	2.19	4	35	14		0	By matching	By MS/MS	By matching	By MS/MS	By MS/MS	By MS/MS	2.9	6	0	12.4
gi|17865718|sp|P08238.4|HS90B_HUMAN;gi|74722492|sp|Q58FF7.1|H90B3_HUMAN;gi|74722491|sp|Q58FF6.1|H90B4_HUMAN	gi|17865718|sp|P08238.4|HS90B_HUMAN	45;21;5	45;21;5	26;10;2	>gi|17865718|sp|P08238.4|HS90B_HUMAN RecName: Full=Heat shock protein HSP 90-beta; Short=HSP 90; AltName: Full=Heat shock 84 kDa; Short=HSP 84; Short=HSP84	3	45	45	26	12	13	13	42	43	41	12	13	13	42	43	41	4	8	8	23	24	23	56.8	56.8	38.8	83.263	724	724;597;505	2.29	12	195	85	6	0	By MS/MS	By MS/MS	By MS/MS	By MS/MS	By MS/MS	By MS/MS	18.6	21.1	19.6	49.9
gi|18201964|sp|O14925.1|TIM23_HUMAN;gi|205830480|sp|Q5SRD1.2|TI23B_HUMAN	gi|18201964|sp|O14925.1|TIM23_HUMAN;gi|205830480|sp|Q5SRD1.2|TI23B_HUMAN	1;1	1;1	1;1	>gi|18201964|sp|O14925.1|TIM23_HUMAN RecName: Full=Mitochondrial import inner membrane translocase subunit Tim23;>gi|205830480|sp|Q5SRD1.2|TI23B_HUMAN PUTATIVE PSEUDOGENE: RecName: Full=Putative mitochondrial import inner membrane translocase subunit Tim23	2	1	1	1	0	0	0	1	1	1	0	0	0	1	1	1	0	0	0	1	1	1	4.8	4.8	4.8	21.943	209	209;257	1	3				0.0098039	By matching	By matching	By matching	By MS/MS	By matching	By matching	0	0	0	4.8
gi|18202039|sp|O43396.3|TXNL1_HUMAN	gi|18202039|sp|O43396.3|TXNL1_HUMAN	3	3	3	>gi|18202039|sp|O43396.3|TXNL1_HUMAN RecName: Full=Thioredoxin-like protein 1; AltName: Full=32 kDa thioredoxin-related protein	1	3	3	3	0	0	0	3	3	3	0	0	0	3	3	3	0	0	0	3	3	3	13.5	13.5	13.5	32.251	289	289	1.09	10	1			0	By matching	By matching	By matching	By MS/MS	By MS/MS	By MS/MS	0	0	0	13.5
gi|18202259|sp|O95376.1|ARI2_HUMAN	gi|18202259|sp|O95376.1|ARI2_HUMAN	5	5	5	>gi|18202259|sp|O95376.1|ARI2_HUMAN RecName: Full=E3 ubiquitin-protein ligase ARIH2; Short=ARI-2; Short=Protein ariadne-2 homolog; AltName: Full=Triad1 protein	1	5	5	5	1	0	1	4	5	4	1	0	1	4	5	4	1	0	1	4	5	4	11.6	11.6	11.6	57.818	493	493	2	1	18	1		0	By matching	By matching	By matching	By MS/MS	By MS/MS	By MS/MS	3.4	0	2.2	11.6
gi|18202440|sp|P82979.3|SARNP_HUMAN	gi|18202440|sp|P82979.3|SARNP_HUMAN	2	2	2	>gi|18202440|sp|P82979.3|SARNP_HUMAN RecName: Full=SAP domain-containing ribonucleoprotein; AltName: Full=Cytokine-induced protein of 29 kDa; AltName: Full=Nuclear protein Hcc-1; AltName: Full=Proliferation-associated cytokine-inducible protein CIP29	1	2	2	2	0	0	0	2	2	1	0	0	0	2	2	1	0	0	0	2	2	1	13.8	13.8	13.8	23.671	210	210	1	5				0	By matching	By matching	By matching	By MS/MS	By MS/MS	By matching	0	0	0	13.8
gi|18202493|sp|Q13045.2|FLII_HUMAN	gi|18202493|sp|Q13045.2|FLII_HUMAN	7	7	7	>gi|18202493|sp|Q13045.2|FLII_HUMAN RecName: Full=Protein flightless-1 homolog	1	7	7	7	0	0	1	7	7	7	0	0	1	7	7	7	0	0	1	7	7	7	6.7	6.7	6.7	144.75	1269	1269	3.04			22	1	0	By matching	By matching	By matching	By MS/MS	By MS/MS	By MS/MS	0	0	1.1	6.7
gi|18202497|sp|Q13367.2|AP3B2_HUMAN	gi|18202497|sp|Q13367.2|AP3B2_HUMAN	4	1	1	>gi|18202497|sp|Q13367.2|AP3B2_HUMAN RecName: Full=AP-3 complex subunit beta-2; AltName: Full=Adaptor protein complex AP-3 subunit beta-2; AltName: Full=Adaptor-related protein complex 3 subunit beta-2; AltName: Full=Beta-3B-adaptin; AltName: Full=Clathrin	1	4	1	1	0	0	1	4	3	3	0	0	1	1	0	0	0	0	1	1	0	0	4.6	1	1	119.06	1082	1082	1	2				1	By matching	By matching	By MS/MS	By matching	By matching	By matching	0	0	1	4.6
gi|18202501|sp|Q15029.1|U5S1_HUMAN	gi|18202501|sp|Q15029.1|U5S1_HUMAN	20	19	19	>gi|18202501|sp|Q15029.1|U5S1_HUMAN RecName: Full=116 kDa U5 small nuclear ribonucleoprotein component; AltName: Full=Elongation factor Tu GTP-binding domain-containing protein 2; AltName: Full=SNU114 homolog; Short=hSNU114; AltName: Full=U5 snRNP-specific	1	20	19	19	0	1	1	19	16	17	0	0	0	18	15	16	0	0	0	18	15	16	27	25.9	25.9	109.43	972	972	3		1	48	1	0	By matching	By matching	By matching	By MS/MS	By MS/MS	By MS/MS	0	1	1	25.6
gi|74758899|sp|Q71DI3.3|H32_HUMAN;gi|55977062|sp|P84243.2|H33_HUMAN;gi|55977055|sp|P68431.2|H31_HUMAN;gi|18202512|sp|Q16695.3|H31T_HUMAN;gi|116248097|sp|Q6NXT2.3|H3C_HUMAN	gi|74758899|sp|Q71DI3.3|H32_HUMAN;gi|55977062|sp|P84243.2|H33_HUMAN;gi|55977055|sp|P68431.2|H31_HUMAN;gi|18202512|sp|Q16695.3|H31T_HUMAN;gi|116248097|sp|Q6NXT2.3|H3C_HUMAN	2;2;2;2;1	2;2;2;2;1	2;2;2;2;1	>gi|74758899|sp|Q71DI3.3|H32_HUMAN RecName: Full=Histone H3.2; AltName: Full=Histone H3/m; AltName: Full=Histone H3/o;>gi|55977062|sp|P84243.2|H33_HUMAN RecName: Full=Histone H3.3;>gi|55977055|sp|P68431.2|H31_HUMAN RecName: Full=Histone H3.1; AltName: Full	5	2	2	2	0	0	2	2	2	2	0	0	2	2	2	2	0	0	2	2	2	2	13.2	13.2	13.2	15.388	136	136;136;136;136;135	1.42	9	1	2		0	By matching	By matching	By MS/MS	By MS/MS	By MS/MS	By MS/MS	0	0	13.2	13.2
gi|18202731|sp|Q9BQ67.1|GRWD1_HUMAN	gi|18202731|sp|Q9BQ67.1|GRWD1_HUMAN	3	3	3	>gi|18202731|sp|Q9BQ67.1|GRWD1_HUMAN RecName: Full=Glutamate-rich WD repeat-containing protein 1	1	3	3	3	1	0	0	3	3	2	1	0	0	3	3	2	1	0	0	3	3	2	8.7	8.7	8.7	49.419	446	446	4				9	0	By matching	By matching	By matching	By MS/MS	By MS/MS	By MS/MS	2	0	0	8.7
gi|18202738|sp|Q9BXS5.3|AP1M1_HUMAN	gi|18202738|sp|Q9BXS5.3|AP1M1_HUMAN	7	7	7	>gi|18202738|sp|Q9BXS5.3|AP1M1_HUMAN RecName: Full=AP-1 complex subunit mu-1; AltName: Full=AP-mu chain family member mu1A; AltName: Full=Adaptor protein complex AP-1 subunit mu-1; AltName: Full=Adaptor-related protein complex 1 subunit mu-1; AltName: Full	1	7	7	7	0	0	0	5	6	6	0	0	0	5	6	6	0	0	0	5	6	6	22.5	22.5	22.5	48.586	423	423	3.14	2	6		13	0	By matching	By matching	By matching	By MS/MS	By MS/MS	By MS/MS	0	0	0	17.3
gi|18202929|sp|Q9GZR7.1|DDX24_HUMAN	gi|18202929|sp|Q9GZR7.1|DDX24_HUMAN	3	3	3	>gi|18202929|sp|Q9GZR7.1|DDX24_HUMAN RecName: Full=ATP-dependent RNA helicase DDX24; AltName: Full=DEAD box protein 24	1	3	3	3	0	0	0	1	2	3	0	0	0	1	2	3	0	0	0	1	2	3	5.7	5.7	5.7	96.331	859	859	3			7		0	By matching	By matching	By matching	By MS/MS	By MS/MS	By MS/MS	0	0	0	1.4
gi|18202935|sp|Q9H223.1|EHD4_HUMAN	gi|18202935|sp|Q9H223.1|EHD4_HUMAN	3	3	3	>gi|18202935|sp|Q9H223.1|EHD4_HUMAN RecName: Full=EH domain-containing protein 4; AltName: Full=Hepatocellular carcinoma-associated protein 10/11; AltName: Full=PAST homolog 4	1	3	3	3	0	0	0	3	3	3	0	0	0	3	3	3	0	0	0	3	3	3	7.2	7.2	7.2	61.174	541	541	2		9			0	By matching	By matching	By matching	By MS/MS	By MS/MS	By MS/MS	0	0	0	7.2
gi|18202945|sp|Q9H4M9.2|EHD1_HUMAN;gi|300669636|sp|Q9NZN3.2|EHD3_HUMAN	gi|18202945|sp|Q9H4M9.2|EHD1_HUMAN;gi|300669636|sp|Q9NZN3.2|EHD3_HUMAN	1;1	1;1	1;1	>gi|18202945|sp|Q9H4M9.2|EHD1_HUMAN RecName: Full=EH domain-containing protein 1; AltName: Full=PAST homolog 1; Short=hPAST1; AltName: Full=Testilin;>gi|300669636|sp|Q9NZN3.2|EHD3_HUMAN RecName: Full=EH domain-containing protein 3; AltName: Full=PAST homol	2	1	1	1	0	0	0	1	1	1	0	0	0	1	1	1	0	0	0	1	1	1	2.1	2.1	2.1	60.626	534	534;535	2		3			1	By matching	By matching	By matching	By matching	By matching	By MS/MS	0	0	0	2.1
gi|18202951|sp|Q9HAV7.2|GRPE1_HUMAN	gi|18202951|sp|Q9HAV7.2|GRPE1_HUMAN	2	2	2	>gi|18202951|sp|Q9HAV7.2|GRPE1_HUMAN RecName: Full=GrpE protein homolog 1, mitochondrial; AltName: Full=HMGE; AltName: Full=Mt-GrpE#1; Flags: Precursor	1	2	2	2	0	0	0	1	2	1	0	0	0	1	2	1	0	0	0	1	2	1	10.1	10.1	10.1	24.279	217	217	4				4	0.0046064	By matching	By matching	By matching	By MS/MS	By MS/MS	By MS/MS	0	0	0	5.1
gi|18203317|sp|Q9NR50.1|EI2BG_HUMAN	gi|18203317|sp|Q9NR50.1|EI2BG_HUMAN	1	1	1	>gi|18203317|sp|Q9NR50.1|EI2BG_HUMAN RecName: Full=Translation initiation factor eIF-2B subunit gamma; AltName: Full=eIF-2B GDP-GTP exchange factor subunit gamma	1	1	1	1	0	0	0	1	1	1	0	0	0	1	1	1	0	0	0	1	1	1	2.4	2.4	2.4	50.24	452	452	4				3	0	By matching	By matching	By matching	By MS/MS	By MS/MS	By matching	0	0	0	2.4
gi|18203497|sp|Q9UBS4.1|DJB11_HUMAN	gi|18203497|sp|Q9UBS4.1|DJB11_HUMAN	3	3	3	>gi|18203497|sp|Q9UBS4.1|DJB11_HUMAN RecName: Full=DnaJ homolog subfamily B member 11; AltName: Full=APOBEC1-binding protein 2; Short=ABBP-2; AltName: Full=DnaJ protein homolog 9; AltName: Full=ER-associated DNAJ; AltName: Full=ER-associated Hsp40 co-chape	1	3	3	3	1	1	0	3	3	2	1	1	0	3	3	2	1	1	0	3	3	2	7.8	7.8	7.8	40.513	358	358	1.67	4	8			0	By matching	By matching	By matching	By MS/MS	By MS/MS	By matching	3.1	3.1	0	7.8
gi|18203499|sp|Q9UFN0.2|NPS3A_HUMAN	gi|18203499|sp|Q9UFN0.2|NPS3A_HUMAN	2	2	2	>gi|18203499|sp|Q9UFN0.2|NPS3A_HUMAN RecName: Full=Protein NipSnap homolog 3A; Short=NipSnap3A; AltName: Full=Protein NipSnap homolog 4; Short=NipSnap4; AltName: Full=Target for Salmonella secreted protein C; Short=TassC	1	2	2	2	0	0	0	2	2	2	0	0	0	2	2	2	0	0	0	2	2	2	13.4	13.4	13.4	28.466	247	247	4				6	0	By matching	By matching	By matching	By MS/MS	By MS/MS	By MS/MS	0	0	0	13.4
gi|18203500|sp|Q9UGP8.2|SEC63_HUMAN	gi|18203500|sp|Q9UGP8.2|SEC63_HUMAN	6	6	6	>gi|18203500|sp|Q9UGP8.2|SEC63_HUMAN RecName: Full=Translocation protein SEC63 homolog	1	6	6	6	0	0	0	6	6	5	0	0	0	6	6	5	0	0	0	6	6	5	10.4	10.4	10.4	87.996	760	760	2.16		17	1	1	0	By matching	By matching	By matching	By MS/MS	By MS/MS	By MS/MS	0	0	0	10.4
gi|18203503|sp|Q9UKF6.1|CPSF3_HUMAN	gi|18203503|sp|Q9UKF6.1|CPSF3_HUMAN	2	2	2	>gi|18203503|sp|Q9UKF6.1|CPSF3_HUMAN RecName: Full=Cleavage and polyadenylation specificity factor subunit 3; AltName: Full=Cleavage and polyadenylation specificity factor 73 kDa subunit; Short=CPSF 73 kDa subunit; AltName: Full=mRNA 3-end-processing endo	1	2	2	2	0	0	0	2	2	2	0	0	0	2	2	2	0	0	0	2	2	2	3.9	3.9	3.9	77.485	684	684	2		6			0	By matching	By matching	By matching	By MS/MS	By MS/MS	By MS/MS	0	0	0	3.9
gi|182627648|sp|Q96HJ9.2|CG055_HUMAN	gi|182627648|sp|Q96HJ9.2|CG055_HUMAN	1	1	1	>gi|182627648|sp|Q96HJ9.2|CG055_HUMAN RecName: Full=UPF0562 protein C7orf55	1	1	1	1	0	0	0	0	1	1	0	0	0	0	1	1	0	0	0	0	1	1	9.7	9.7	9.7	12.749	113	113	1	2				0.0098425	By matching	By matching	By matching	By matching	By matching	By MS/MS	0	0	0	0
gi|182668644|sp|Q8NCN5.2|PDPR_HUMAN	gi|182668644|sp|Q8NCN5.2|PDPR_HUMAN	6	6	6	>gi|182668644|sp|Q8NCN5.2|PDPR_HUMAN RecName: Full=Pyruvate dehydrogenase phosphatase regulatory subunit, mitochondrial; Short=PDPr; Flags: Precursor	1	6	6	6	0	0	0	6	6	5	0	0	0	6	6	5	0	0	0	6	6	5	8.9	8.9	8.9	99.363	879	879	2.11		17	2		0	By matching	By matching	By matching	By MS/MS	By MS/MS	By MS/MS	0	0	0	8.9
gi|18266879|sp|P48426.2|PI42A_HUMAN	gi|18266879|sp|P48426.2|PI42A_HUMAN	4	4	3	>gi|18266879|sp|P48426.2|PI42A_HUMAN RecName: Full=Phosphatidylinositol 5-phosphate 4-kinase type-2 alpha; AltName: Full=1-phosphatidylinositol 5-phosphate 4-kinase 2-alpha; AltName: Full=Diphosphoinositide kinase 2-alpha; AltName: Full=PIP5KIII; AltName:	1	4	4	3	0	0	0	4	4	4	0	0	0	4	4	4	0	0	0	3	3	3	11.6	11.6	9.4	46.224	406	406	3.59		3	1	13	0	By matching	By matching	By matching	By MS/MS	By MS/MS	By MS/MS	0	0	0	11.6
gi|182676426|sp|Q14444.2|CAPR1_HUMAN	gi|182676426|sp|Q14444.2|CAPR1_HUMAN	4	4	4	>gi|182676426|sp|Q14444.2|CAPR1_HUMAN RecName: Full=Caprin-1; AltName: Full=Cell cycle-associated protein 1; AltName: Full=Cytoplasmic activation- and proliferation-associated protein 1; AltName: Full=GPI-anchored membrane protein 1; AltName: Full=GPI-anch	1	4	4	4	2	0	0	4	3	3	2	0	0	4	3	3	2	0	0	4	3	3	10.7	10.7	10.7	78.365	709	709	2.29	1	10	6		0	By MS/MS	By matching	By matching	By MS/MS	By MS/MS	By MS/MS	3.2	0	0	10.7
gi|182705285|sp|Q3ZCM7.2|TBB8_HUMAN	gi|182705285|sp|Q3ZCM7.2|TBB8_HUMAN	9	1	1	>gi|182705285|sp|Q3ZCM7.2|TBB8_HUMAN RecName: Full=Tubulin beta-8 chain	1	9	1	1	5	7	7	9	9	9	0	0	0	1	1	1	0	0	0	1	1	1	22.5	7.2	7.2	49.775	444	444	3.67			3	6	0	By matching	By matching	By matching	By MS/MS	By MS/MS	By MS/MS	10.1	13.3	13.3	22.5
gi|18276665|sp|Q15056.5|IF4H_HUMAN	gi|18276665|sp|Q15056.5|IF4H_HUMAN	2	2	2	>gi|18276665|sp|Q15056.5|IF4H_HUMAN RecName: Full=Eukaryotic translation initiation factor 4H; Short=eIF-4H; AltName: Full=Williams-Beuren syndrome chromosomal region 1 protein	1	2	2	2	1	0	0	2	2	2	1	0	0	2	2	2	1	0	0	2	2	2	14.9	14.9	14.9	27.385	248	248	1.5	7	1	2		0	By matching	By matching	By matching	By MS/MS	By MS/MS	By MS/MS	5.6	0	0	14.9
gi|187471109|sp|Q6DKJ4.2|NXN_HUMAN	gi|187471109|sp|Q6DKJ4.2|NXN_HUMAN	3	3	3	>gi|187471109|sp|Q6DKJ4.2|NXN_HUMAN RecName: Full=Nucleoredoxin	1	3	3	3	0	0	0	3	3	3	0	0	0	3	3	3	0	0	0	3	3	3	11.7	11.7	11.7	48.392	435	435	4				9	0	By matching	By matching	By matching	By MS/MS	By MS/MS	By matching	0	0	0	11.7
gi|187608890|sp|P28074.3|PSB5_HUMAN	gi|187608890|sp|P28074.3|PSB5_HUMAN	10	10	10	>gi|187608890|sp|P28074.3|PSB5_HUMAN RecName: Full=Proteasome subunit beta type-5; AltName: Full=Macropain epsilon chain; AltName: Full=Multicatalytic endopeptidase complex epsilon chain; AltName: Full=Proteasome chain 6; AltName: Full=Proteasome epsilon c	1	10	10	10	0	1	0	9	10	8	0	1	0	9	10	8	0	1	0	9	10	8	46.8	46.8	46.8	28.48	263	263	1.62	27			7	0	By matching	By MS/MS	By matching	By MS/MS	By MS/MS	By MS/MS	0	6.1	0	42.2
gi|187609583|sp|A8MVA2.1|KRA96_HUMAN	gi|187609583|sp|A8MVA2.1|KRA96_HUMAN	1	1	1	>gi|187609583|sp|A8MVA2.1|KRA96_HUMAN RecName: Full=Keratin-associated protein 9-6	1	1	1	1	0	0	0	0	1	0	0	0	0	0	1	0	0	0	0	0	1	0	8.8	8.8	8.8	16.801	160	160	4				1	0.0045967	By matching	By matching	By matching	By matching	By MS/MS	By matching	0	0	0	0
gi|189028467|sp|Q8IYT4.3|KATL2_HUMAN	gi|189028467|sp|Q8IYT4.3|KATL2_HUMAN	1	1	1	>gi|189028467|sp|Q8IYT4.3|KATL2_HUMAN RecName: Full=Katanin p60 ATPase-containing subunit A-like 2; Short=Katanin p60 subunit A-like 2; AltName: Full=p60 katanin-like 2	1	1	1	1	0	0	1	1	1	1	0	0	1	1	1	1	0	0	1	1	1	1	2.2	2.2	2.2	61.252	538	538	2.17	1	3	2		0.0017145	By matching	By matching	By matching	By MS/MS	By MS/MS	By MS/MS	0	0	2.2	2.2
gi|189029218|sp|Q5HYI7.2|MTX3_HUMAN	gi|189029218|sp|Q5HYI7.2|MTX3_HUMAN	1	1	1	>gi|189029218|sp|Q5HYI7.2|MTX3_HUMAN RecName: Full=Metaxin-3	1	1	1	1	0	0	0	1	1	0	0	0	0	1	1	0	0	0	0	1	1	0	5.8	5.8	5.8	35.093	312	312	4				2	0.0094937	By matching	By matching	By matching	By MS/MS	By matching	By matching	0	0	0	5.8
gi|189029914|sp|Q0IIM8.2|TBC8B_HUMAN;gi|262527569|sp|O95759.3|TBCD8_HUMAN	gi|189029914|sp|Q0IIM8.2|TBC8B_HUMAN;gi|262527569|sp|O95759.3|TBCD8_HUMAN	1;1	1;1	1;1	>gi|189029914|sp|Q0IIM8.2|TBC8B_HUMAN RecName: Full=TBC1 domain family member 8B;>gi|262527569|sp|O95759.3|TBCD8_HUMAN RecName: Full=TBC1 domain family member 8; AltName: Full=AD 3; AltName: Full=Vascular Rab-GAP/TBC-containing protein	2	1	1	1	0	0	0	0	1	1	0	0	0	0	1	1	0	0	0	0	1	1	1	1	1	128.71	1120	1120;1140	1.5	1	1			1	By matching	By matching	By matching	By matching	By matching	By MS/MS	0	0	0	0
gi|189031482|sp|Q9Y6X4.2|F169A_HUMAN	gi|189031482|sp|Q9Y6X4.2|F169A_HUMAN	8	8	8	>gi|189031482|sp|Q9Y6X4.2|F169A_HUMAN RecName: Full=Soluble lamin-associated protein of 75 kDa; Short=SLAP75; AltName: Full=Protein FAM169A	1	8	8	8	0	0	1	6	7	6	0	0	1	6	7	6	0	0	1	6	7	6	21.5	21.5	21.5	74.954	670	670	2.89		3	24		0	By matching	By matching	By matching	By MS/MS	By MS/MS	By MS/MS	0	0	1.5	16.6
gi|189047132|sp|P51114.3|FXR1_HUMAN;gi|544328|sp|Q06787.1|FMR1_HUMAN	gi|189047132|sp|P51114.3|FXR1_HUMAN;gi|544328|sp|Q06787.1|FMR1_HUMAN	2;1	1;0	1;0	>gi|189047132|sp|P51114.3|FXR1_HUMAN RecName: Full=Fragile X mental retardation syndrome-related protein 1; Short=hFXR1p;>gi|544328|sp|Q06787.1|FMR1_HUMAN RecName: Full=Synaptic functional regulator FMR1; AltName: Full=Fragile X mental retardation protein	2	2	1	1	2	1	0	1	1	2	1	0	0	1	1	1	1	0	0	1	1	1	3.4	2.1	2.1	69.72	621	621;632	2		4			0.0094899	By matching	By matching	By matching	By matching	By matching	By MS/MS	3.4	1.3	0	2.1
gi|189082691|sp|A8TX70.1|CO6A5_HUMAN	gi|189082691|sp|A8TX70.1|CO6A5_HUMAN	1	1	1	>gi|189082691|sp|A8TX70.1|CO6A5_HUMAN RecName: Full=Collagen alpha-5(VI) chain; AltName: Full=Collagen alpha-1(XXIX) chain; AltName: Full=von Willebrand factor A domain-containing protein 4; Flags: Precursor	1	1	1	1	0	0	0	1	0	0	0	0	0	1	0	0	0	0	0	1	0	0	0.7	0.7	0.7	289.92	2615	2615	3			1		1	By matching	By matching	By matching	By MS/MS	By matching	By matching	0	0	0	0.7
gi|189082900|sp|Q96S19.2|CP013_HUMAN	gi|189082900|sp|Q96S19.2|CP013_HUMAN	1	1	1	>gi|189082900|sp|Q96S19.2|CP013_HUMAN RecName: Full=UPF0585 protein C16orf13	1	1	1	1	0	0	0	1	1	0	0	0	0	1	1	0	0	0	0	1	1	0	4.4	4.4	4.4	22.578	204	204	1	2				1	By matching	By matching	By matching	By matching	By MS/MS	By matching	0	0	0	4.4
gi|189083208|sp|Q96H55.2|MYO19_HUMAN	gi|189083208|sp|Q96H55.2|MYO19_HUMAN	1	1	1	>gi|189083208|sp|Q96H55.2|MYO19_HUMAN RecName: Full=Unconventional myosin-XIX; AltName: Full=Myosin head domain-containing protein 1	1	1	1	1	0	0	0	1	0	0	0	0	0	1	0	0	0	0	0	1	0	0	2.2	2.2	2.2	109.13	970	970	3			1		0	By matching	By matching	By matching	By MS/MS	By matching	By matching	0	0	0	2.2
gi|190359323|sp|Q9H019.2|MFR1L_HUMAN	gi|190359323|sp|Q9H019.2|MFR1L_HUMAN	1	1	1	>gi|190359323|sp|Q9H019.2|MFR1L_HUMAN RecName: Full=Mitochondrial fission regulator 1-like	1	1	1	1	0	0	0	1	1	1	0	0	0	1	1	1	0	0	0	1	1	1	4.1	4.1	4.1	31.957	292	292	3			3		1	By matching	By matching	By matching	By MS/MS	By matching	By matching	0	0	0	4.1
gi|190359598|sp|Q58FF8.2|H90B2_HUMAN	gi|190359598|sp|Q58FF8.2|H90B2_HUMAN	9	2	2	>gi|190359598|sp|Q58FF8.2|H90B2_HUMAN RecName: Full=Putative heat shock protein HSP 90-beta 2; AltName: Full=Heat shock protein 90-beta b; Short=Heat shock protein 90Bb	1	9	2	2	5	4	3	9	9	8	0	0	0	2	2	1	0	0	0	2	2	1	18.1	4.5	4.5	44.348	381	381	2.18		9	2		0	By matching	By matching	By matching	By MS/MS	By MS/MS	By MS/MS	12.3	12.6	8.1	18.1
gi|190359882|sp|Q5TCQ9.2|MAGI3_HUMAN	gi|190359882|sp|Q5TCQ9.2|MAGI3_HUMAN	3	3	3	>gi|190359882|sp|Q5TCQ9.2|MAGI3_HUMAN RecName: Full=Membrane-associated guanylate kinase, WW and PDZ domain-containing protein 3; AltName: Full=Membrane-associated guanylate kinase inverted 3; Short=MAGI-3	1	3	3	3	0	0	0	3	2	3	0	0	0	3	2	3	0	0	0	3	2	3	3.3	3.3	3.3	165.61	1506	1506	3			8		0.00045331	By matching	By matching	By matching	By MS/MS	By MS/MS	By matching	0	0	0	3.3
gi|190360155|sp|A6NED2.1|RCCD1_HUMAN	gi|190360155|sp|A6NED2.1|RCCD1_HUMAN	2	2	2	>gi|190360155|sp|A6NED2.1|RCCD1_HUMAN RecName: Full=RCC1 domain-containing protein 1	1	2	2	2	0	1	0	2	2	1	0	1	0	2	2	1	0	1	0	2	2	1	6.4	6.4	6.4	40.078	376	376	1.43	4	3			0	By matching	By matching	By matching	By MS/MS	By matching	By MS/MS	0	2.9	0	6.4
gi|190360182|sp|P0C7P2.1|RFL3S_HUMAN	gi|190360182|sp|P0C7P2.1|RFL3S_HUMAN	1	1	1	>gi|190360182|sp|P0C7P2.1|RFL3S_HUMAN RecName: Full=Putative protein RFPL3S; AltName: Full=RFPL3 antisense RNA 1; AltName: Full=RFPL3 antisense gene protein 1; AltName: Full=Ret finger protein-like 3 antisense gene protein	1	1	1	1	1	1	1	0	1	0	1	1	1	0	1	0	1	1	1	0	1	0	10.3	10.3	10.3	11.738	107	107	2	3	1	3		1	By MS/MS	By MS/MS	By matching	By matching	By MS/MS	By matching	10.3	10.3	10.3	0
gi|190411564|sp|Q6P1X6.2|CH082_HUMAN	gi|190411564|sp|Q6P1X6.2|CH082_HUMAN	1	1	1	>gi|190411564|sp|Q6P1X6.2|CH082_HUMAN RecName: Full=UPF0598 protein C8orf82	1	1	1	1	0	0	0	0	1	1	0	0	0	0	1	1	0	0	0	0	1	1	6.9	6.9	6.9	23.889	216	216	1	2				0	By matching	By matching	By matching	By matching	By MS/MS	By MS/MS	0	0	0	0
gi|193806337|sp|Q14318.2|FKBP8_HUMAN	gi|193806337|sp|Q14318.2|FKBP8_HUMAN	3	3	3	>gi|193806337|sp|Q14318.2|FKBP8_HUMAN RecName: Full=Peptidyl-prolyl cis-trans isomerase FKBP8; Short=PPIase FKBP8; AltName: Full=38 kDa FK506-binding protein; Short=38 kDa FKBP; Short=FKBP-38; Short=hFKBP38; AltName: Full=FK506-binding protein 8; Short=FKB	1	3	3	3	0	0	0	3	2	3	0	0	0	3	2	3	0	0	0	3	2	3	11.4	11.4	11.4	44.561	412	412	3.27		3	5	7	0	By matching	By matching	By matching	By MS/MS	By MS/MS	By MS/MS	0	0	0	11.4
gi|193806361|sp|P01860.2|IGHG3_HUMAN	gi|193806361|sp|P01860.2|IGHG3_HUMAN	5	3	1	>gi|193806361|sp|P01860.2|IGHG3_HUMAN RecName: Full=Ig gamma-3 chain C region; AltName: Full=HDC; AltName: Full=Heavy chain disease protein	1	5	3	1	0	0	5	1	0	1	0	0	3	0	0	0	0	0	1	0	0	0	17	10.6	3.2	41.287	377	377	1	5				0	By matching	By matching	By MS/MS	By matching	By matching	By matching	0	0	17	3.7
gi|193806374|sp|P01871.3|IGHM_HUMAN;gi|127506|sp|P04220.1|MUCB_HUMAN	gi|193806374|sp|P01871.3|IGHM_HUMAN	5;2	5;2	5;2	>gi|193806374|sp|P01871.3|IGHM_HUMAN RecName: Full=Ig mu chain C region	2	5	5	5	0	0	5	2	1	0	0	0	5	2	1	0	0	0	5	2	1	0	12.6	12.6	12.6	49.306	452	452;391	1.1	9	1			0	By matching	By matching	By MS/MS	By matching	By matching	By matching	0	0	12.6	6
gi|19855073|sp|P04792.2|HSPB1_HUMAN	gi|19855073|sp|P04792.2|HSPB1_HUMAN	5	5	5	>gi|19855073|sp|P04792.2|HSPB1_HUMAN RecName: Full=Heat shock protein beta-1; Short=HspB1; AltName: Full=28 kDa heat shock protein; AltName: Full=Estrogen-regulated 24 kDa protein; AltName: Full=Heat shock 27 kDa protein; Short=HSP 27; AltName: Full=Stress	1	5	5	5	2	1	4	3	4	5	2	1	4	3	4	5	2	1	4	3	4	5	31.2	31.2	31.2	22.782	205	205	2.07	16	3	2	8	0	By matching	By matching	By MS/MS	By MS/MS	By MS/MS	By MS/MS	12.7	4.9	25.9	17.6
gi|19857543|sp|P25205.3|MCM3_HUMAN	gi|19857543|sp|P25205.3|MCM3_HUMAN	22	22	22	>gi|19857543|sp|P25205.3|MCM3_HUMAN RecName: Full=DNA replication licensing factor MCM3; AltName: Full=DNA polymerase alpha holoenzyme-associated protein P1; AltName: Full=P1-MCM3; AltName: Full=RLF subunit beta; AltName: Full=p102	1	22	22	22	0	1	3	18	22	17	0	1	3	18	22	17	0	1	3	18	22	17	32.4	32.4	32.4	90.98	808	808	2.39	3	54	42		0	By matching	By MS/MS	By matching	By MS/MS	By MS/MS	By MS/MS	0	2.5	5.7	28
gi|19858646|sp|P33992.5|MCM5_HUMAN	gi|19858646|sp|P33992.5|MCM5_HUMAN	14	14	14	>gi|19858646|sp|P33992.5|MCM5_HUMAN RecName: Full=DNA replication licensing factor MCM5; AltName: Full=CDC46 homolog; AltName: Full=P1-CDC46	1	14	14	14	1	2	0	12	14	11	1	2	0	12	14	11	1	2	0	12	14	11	23.2	23.2	23.2	82.285	734	734	2.23		43	13		0	By matching	By matching	By matching	By MS/MS	By MS/MS	By MS/MS	1.6	3.4	0	22.2
gi|19860217|sp|P49591.3|SYSC_HUMAN	gi|19860217|sp|P49591.3|SYSC_HUMAN	11	11	11	>gi|19860217|sp|P49591.3|SYSC_HUMAN RecName: Full=Serine--tRNA ligase, cytoplasmic; AltName: Full=Seryl-tRNA synthetase; Short=SerRS; AltName: Full=Seryl-tRNA(Ser/Sec) synthetase	1	11	11	11	0	0	0	11	11	9	0	0	0	11	11	9	0	0	0	11	11	9	31.7	31.7	31.7	58.777	514	514	1.98	1	41			0	By matching	By matching	By matching	By MS/MS	By MS/MS	By MS/MS	0	0	0	31.7
gi|19863082|sp|Q12972.2|PP1R8_HUMAN	gi|19863082|sp|Q12972.2|PP1R8_HUMAN	1	1	1	>gi|19863082|sp|Q12972.2|PP1R8_HUMAN RecName: Full=Nuclear inhibitor of protein phosphatase 1; Short=NIPP-1; AltName: Full=Protein phosphatase 1 regulatory inhibitor subunit 8; Includes: RecName: Full=Activator of RNA decay; AltName: Full=ARD-1	1	1	1	1	0	0	0	1	1	1	0	0	0	1	1	1	0	0	0	1	1	1	6	6	6	38.478	351	351	2		3			0	By matching	By matching	By matching	By MS/MS	By MS/MS	By MS/MS	0	0	0	6
gi|19863257|sp|Q13616.2|CUL1_HUMAN	gi|19863257|sp|Q13616.2|CUL1_HUMAN	3	3	3	>gi|19863257|sp|Q13616.2|CUL1_HUMAN RecName: Full=Cullin-1; Short=CUL-1	1	3	3	3	0	0	0	3	1	1	0	0	0	3	1	1	0	0	0	3	1	1	4.8	4.8	4.8	89.677	776	776	2.17		5	1		0	By matching	By matching	By matching	By MS/MS	By MS/MS	By matching	0	0	0	4.8
gi|19863260|sp|Q13617.2|CUL2_HUMAN	gi|19863260|sp|Q13617.2|CUL2_HUMAN	2	2	2	>gi|19863260|sp|Q13617.2|CUL2_HUMAN RecName: Full=Cullin-2; Short=CUL-2	1	2	2	2	0	0	0	1	1	2	0	0	0	1	1	2	0	0	0	1	1	2	3	3	3	86.982	745	745	2		4			0.00044803	By matching	By matching	By matching	By MS/MS	By MS/MS	By matching	0	0	0	1.3
gi|20137255|sp|O14617.1|AP3D1_HUMAN	gi|20137255|sp|O14617.1|AP3D1_HUMAN	8	8	8	>gi|20137255|sp|O14617.1|AP3D1_HUMAN RecName: Full=AP-3 complex subunit delta-1; AltName: Full=AP-3 complex subunit delta; AltName: Full=Adaptor-related protein complex 3 subunit delta-1; AltName: Full=Delta-adaptin	1	8	8	8	0	0	0	7	8	8	0	0	0	7	8	8	0	0	0	7	8	8	9.7	9.7	9.7	130.16	1153	1153	3		1	30	1	0	By matching	By matching	By matching	By MS/MS	By MS/MS	By MS/MS	0	0	0	8.8
gi|20137409|sp|Q96LA8.1|ANM6_HUMAN	gi|20137409|sp|Q96LA8.1|ANM6_HUMAN	2	2	2	>gi|20137409|sp|Q96LA8.1|ANM6_HUMAN RecName: Full=Protein arginine N-methyltransferase 6; AltName: Full=Heterogeneous nuclear ribonucleoprotein methyltransferase-like protein 6; AltName: Full=Histone-arginine N-methyltransferase PRMT6	1	2	2	2	0	0	0	2	1	1	0	0	0	2	1	1	0	0	0	2	1	1	9.6	9.6	9.6	41.937	375	375	2		4			0	By matching	By matching	By matching	By MS/MS	By MS/MS	By matching	0	0	0	9.6
gi|20137457|sp|Q9BXP5.1|SRRT_HUMAN	gi|20137457|sp|Q9BXP5.1|SRRT_HUMAN	9	9	9	>gi|20137457|sp|Q9BXP5.1|SRRT_HUMAN RecName: Full=Serrate RNA effector molecule homolog; AltName: Full=Arsenite-resistance protein 2	1	9	9	9	0	1	1	9	9	8	0	1	1	9	9	8	0	1	1	9	9	8	11.3	11.3	11.3	100.67	876	876	2.98		1	40		0	By matching	By matching	By matching	By MS/MS	By MS/MS	By MS/MS	0	1.3	1.3	11.3
gi|20137480|sp|Q9H4A4.2|AMPB_HUMAN	gi|20137480|sp|Q9H4A4.2|AMPB_HUMAN	15	15	15	>gi|20137480|sp|Q9H4A4.2|AMPB_HUMAN RecName: Full=Aminopeptidase B; Short=AP-B; AltName: Full=Arginine aminopeptidase; AltName: Full=Arginyl aminopeptidase	1	15	15	15	0	0	0	15	14	13	0	0	0	15	14	13	0	0	0	15	14	13	29.4	29.4	29.4	72.595	650	650	1.96	3	47	1		0	By matching	By matching	By matching	By MS/MS	By MS/MS	By MS/MS	0	0	0	29.4
gi|20137525|sp|Q9NR19.1|ACSA_HUMAN	gi|20137525|sp|Q9NR19.1|ACSA_HUMAN	1	1	1	>gi|20137525|sp|Q9NR19.1|ACSA_HUMAN RecName: Full=Acetyl-coenzyme A synthetase, cytoplasmic; AltName: Full=Acetate--CoA ligase; AltName: Full=Acetyl-CoA synthetase; Short=ACS; Short=AceCS; AltName: Full=Acyl-CoA synthetase short-chain family member 2; AltN	1	1	1	1	0	0	0	1	1	1	0	0	0	1	1	1	0	0	0	1	1	1	2.6	2.6	2.6	78.579	701	701	2		3			0.0076799	By matching	By matching	By matching	By MS/MS	By matching	By matching	0	0	0	2.6
gi|20137612|sp|O14618.1|CCS_HUMAN	gi|20137612|sp|O14618.1|CCS_HUMAN	2	2	2	>gi|20137612|sp|O14618.1|CCS_HUMAN RecName: Full=Copper chaperone for superoxide dismutase; AltName: Full=Superoxide dismutase copper chaperone	1	2	2	2	0	0	0	2	2	2	0	0	0	2	2	2	0	0	0	2	2	2	8	8	8	29.04	274	274	1.14	6	1			0	By matching	By matching	By matching	By MS/MS	By MS/MS	By MS/MS	0	0	0	8
gi|20137621|sp|O95071.2|UBR5_HUMAN	gi|20137621|sp|O95071.2|UBR5_HUMAN	12	12	12	>gi|20137621|sp|O95071.2|UBR5_HUMAN RecName: Full=E3 ubiquitin-protein ligase UBR5; AltName: Full=E3 ubiquitin-protein ligase, HECT domain-containing 1; AltName: Full=HECT-type E3 ubiquitin transferase UBR5; AltName: Full=Hyperplastic discs protein homolog	1	12	12	12	0	0	0	12	11	11	0	0	0	12	11	11	0	0	0	12	11	11	5.8	5.8	5.8	309.35	2799	2799	2.97		1	34		0	By matching	By matching	By matching	By MS/MS	By MS/MS	By MS/MS	0	0	0	5.8
gi|20137671|sp|Q9UBX3.2|DIC_HUMAN	gi|20137671|sp|Q9UBX3.2|DIC_HUMAN	5	5	5	>gi|20137671|sp|Q9UBX3.2|DIC_HUMAN RecName: Full=Mitochondrial dicarboxylate carrier; AltName: Full=Solute carrier family 25 member 10	1	5	5	5	1	0	0	5	3	3	1	0	0	5	3	3	1	0	0	5	3	3	24.7	24.7	24.7	31.282	287	287	1.06	15	1			0	By matching	By matching	By matching	By MS/MS	By MS/MS	By MS/MS	3.8	0	0	24.7
gi|20137697|sp|O60762.1|DPM1_HUMAN	gi|20137697|sp|O60762.1|DPM1_HUMAN	3	3	3	>gi|20137697|sp|O60762.1|DPM1_HUMAN RecName: Full=Dolichol-phosphate mannosyltransferase subunit 1; AltName: Full=Dolichol-phosphate mannose synthase subunit 1; Short=DPM synthase subunit 1; AltName: Full=Dolichyl-phosphate beta-D-mannosyltransferase subun	1	3	3	3	0	0	0	3	3	3	0	0	0	3	3	3	0	0	0	3	3	3	13.1	13.1	13.1	29.634	260	260	1.58	8	1	3		0	By matching	By matching	By matching	By MS/MS	By MS/MS	By MS/MS	0	0	0	13.1
gi|20137929|sp|Q9BPU6.1|DPYL5_HUMAN	gi|20137929|sp|Q9BPU6.1|DPYL5_HUMAN	5	5	5	>gi|20137929|sp|Q9BPU6.1|DPYL5_HUMAN RecName: Full=Dihydropyrimidinase-related protein 5; Short=DRP-5; AltName: Full=CRMP3-associated molecule; Short=CRAM; AltName: Full=Collapsin response mediator protein 5; Short=CRMP-5; AltName: Full=UNC33-like phosphop	1	5	5	5	0	0	0	4	4	5	0	0	0	4	4	5	0	0	0	4	4	5	12.4	12.4	12.4	61.421	564	564	2.11		17	2		0	By matching	By matching	By matching	By MS/MS	By MS/MS	By MS/MS	0	0	0	9.6
gi|20138037|sp|Q9P0U4.2|CXXC1_HUMAN	gi|20138037|sp|Q9P0U4.2|CXXC1_HUMAN	1	1	1	>gi|20138037|sp|Q9P0U4.2|CXXC1_HUMAN RecName: Full=CXXC-type zinc finger protein 1; AltName: Full=CpG-binding protein; AltName: Full=PHD finger and CXXC domain-containing protein 1	1	1	1	1	0	0	0	1	1	1	0	0	0	1	1	1	0	0	0	1	1	1	2.1	2.1	2.1	75.711	656	656	2.5		3	3		0.0069162	By matching	By matching	By matching	By MS/MS	By MS/MS	By MS/MS	0	0	0	2.1
gi|20138066|sp|Q9UBM7.1|DHCR7_HUMAN	gi|20138066|sp|Q9UBM7.1|DHCR7_HUMAN	1	1	1	>gi|20138066|sp|Q9UBM7.1|DHCR7_HUMAN RecName: Full=7-dehydrocholesterol reductase; Short=7-DHC reductase; AltName: Full=Putative sterol reductase SR-2; AltName: Full=Sterol Delta(7)-reductase	1	1	1	1	0	0	0	1	1	1	0	0	0	1	1	1	0	0	0	1	1	1	2.7	2.7	2.7	54.489	475	475	2.25		3	1		0	By matching	By matching	By matching	By MS/MS	By MS/MS	By matching	0	0	0	2.7
gi|20138067|sp|Q9UHB6.1|LIMA1_HUMAN	gi|20138067|sp|Q9UHB6.1|LIMA1_HUMAN	2	2	2	>gi|20138067|sp|Q9UHB6.1|LIMA1_HUMAN RecName: Full=LIM domain and actin-binding protein 1; AltName: Full=Epithelial protein lost in neoplasm	1	2	2	2	0	0	0	2	1	1	0	0	0	2	1	1	0	0	0	2	1	1	3	3	3	85.225	759	759	2.2		4	1		0.0076336	By matching	By matching	By matching	By MS/MS	By MS/MS	By matching	0	0	0	3
gi|20138086|sp|Q9Y224.1|CN166_HUMAN	gi|20138086|sp|Q9Y224.1|CN166_HUMAN	4	4	4	>gi|20138086|sp|Q9Y224.1|CN166_HUMAN RecName: Full=UPF0568 protein C14orf166; AltName: Full=CLE7 homolog; Short=CLE	1	4	4	4	1	0	1	4	3	4	1	0	1	4	3	4	1	0	1	4	3	4	27	27	27	28.068	244	244	3.29	4			13	0	By matching	By matching	By matching	By MS/MS	By MS/MS	By MS/MS	5.7	0	5.7	27
gi|20138589|sp|Q15691.3|MARE1_HUMAN	gi|20138589|sp|Q15691.3|MARE1_HUMAN	6	6	6	>gi|20138589|sp|Q15691.3|MARE1_HUMAN RecName: Full=Microtubule-associated protein RP/EB family member 1; AltName: Full=APC-binding protein EB1; AltName: Full=End-binding protein 1; Short=EB1	1	6	6	6	0	0	0	6	6	6	0	0	0	6	6	6	0	0	0	6	6	6	42.2	42.2	42.2	29.999	268	268	1	21				0	By matching	By matching	By matching	By MS/MS	By MS/MS	By MS/MS	0	0	0	42.2
gi|20138710|sp|Q9BW19.2|KIFC1_HUMAN	gi|20138710|sp|Q9BW19.2|KIFC1_HUMAN	1	1	1	>gi|20138710|sp|Q9BW19.2|KIFC1_HUMAN RecName: Full=Kinesin-like protein KIFC1; AltName: Full=Kinesin-like protein 2; AltName: Full=Kinesin-related protein HSET	1	1	1	1	0	0	0	1	1	1	0	0	0	1	1	1	0	0	0	1	1	1	2.1	2.1	2.1	73.747	673	673	2		3			0	By matching	By matching	By matching	By matching	By MS/MS	By MS/MS	0	0	0	2.1
gi|20138731|sp|Q9HCC0.1|MCCB_HUMAN	gi|20138731|sp|Q9HCC0.1|MCCB_HUMAN	11	11	11	>gi|20138731|sp|Q9HCC0.1|MCCB_HUMAN RecName: Full=Methylcrotonoyl-CoA carboxylase beta chain, mitochondrial; Short=MCCase subunit beta; AltName: Full=3-methylcrotonyl-CoA carboxylase 2; AltName: Full=3-methylcrotonyl-CoA carboxylase non-biotin-containing s	1	11	11	11	0	0	0	9	11	10	0	0	0	9	11	10	0	0	0	9	11	10	28.4	28.4	28.4	61.332	563	563	2.11		33	4		0	By matching	By matching	By matching	By MS/MS	By MS/MS	By MS/MS	0	0	0	24
gi|20138852|sp|Q9BQT8.1|ODC_HUMAN	gi|20138852|sp|Q9BQT8.1|ODC_HUMAN	1	1	1	>gi|20138852|sp|Q9BQT8.1|ODC_HUMAN RecName: Full=Mitochondrial 2-oxodicarboxylate carrier; AltName: Full=Solute carrier family 25 member 21	1	1	1	1	0	0	0	0	1	0	0	0	0	0	1	0	0	0	0	0	1	0	5.4	5.4	5.4	33.303	299	299	1	1				1	By matching	By matching	By matching	By matching	By MS/MS	By matching	0	0	0	0
gi|20138899|sp|O96007.1|MOC2B_HUMAN	gi|20138899|sp|O96007.1|MOC2B_HUMAN	1	1	1	>gi|20138899|sp|O96007.1|MOC2B_HUMAN RecName: Full=Molybdopterin synthase catalytic subunit; AltName: Full=MOCO1-B; AltName: Full=Molybdenum cofactor synthesis protein 2 large subunit; AltName: Full=Molybdenum cofactor synthesis protein 2B; Short=MOCS2B; A	1	1	1	1	0	0	0	1	1	1	0	0	0	1	1	1	0	0	0	1	1	1	8	8	8	20.944	188	188	1	3				0.0069275	By matching	By matching	By matching	By matching	By MS/MS	By matching	0	0	0	8
gi|20138912|sp|P58546.2|MTPN_HUMAN	gi|20138912|sp|P58546.2|MTPN_HUMAN	2	2	2	>gi|20138912|sp|P58546.2|MTPN_HUMAN RecName: Full=Myotrophin; AltName: Full=Protein V-1	1	2	2	2	0	0	1	1	2	2	0	0	1	1	2	2	0	0	1	1	2	2	30.5	30.5	30.5	12.895	118	118	1	6				0	By matching	By matching	By matching	By matching	By MS/MS	By MS/MS	0	0	14.4	14.4
gi|20138951|sp|Q13835.2|PKP1_HUMAN	gi|20138951|sp|Q13835.2|PKP1_HUMAN	20	20	20	>gi|20138951|sp|Q13835.2|PKP1_HUMAN RecName: Full=Plakophilin-1; AltName: Full=Band 6 protein; Short=B6P	1	20	20	20	4	4	19	1	4	3	4	4	19	1	4	3	4	4	19	1	4	3	36.1	36.1	36.1	82.86	747	747	1.65	33	9	5	5	0	By MS/MS	By MS/MS	By MS/MS	By matching	By MS/MS	By MS/MS	7	7	34.7	1.5
gi|20139075|sp|Q96SU4.2|OSBL9_HUMAN	gi|20139075|sp|Q96SU4.2|OSBL9_HUMAN	2	2	2	>gi|20139075|sp|Q96SU4.2|OSBL9_HUMAN RecName: Full=Oxysterol-binding protein-related protein 9; Short=ORP-9; Short=OSBP-related protein 9	1	2	2	2	0	0	1	2	2	2	0	0	1	2	2	2	0	0	1	2	2	2	3.1	3.1	3.1	83.184	736	736	2.27	1	6	4		0	By matching	By matching	By matching	By MS/MS	By MS/MS	By MS/MS	0	0	1.8	3.1
gi|20139127|sp|Q9BXB4.2|OSB11_HUMAN;gi|20139128|sp|Q9BXB5.2|OSB10_HUMAN	gi|20139127|sp|Q9BXB4.2|OSB11_HUMAN	4;1	4;1	4;1	>gi|20139127|sp|Q9BXB4.2|OSB11_HUMAN RecName: Full=Oxysterol-binding protein-related protein 11; Short=ORP-11; Short=OSBP-related protein 11	2	4	4	4	1	0	0	3	3	3	1	0	0	3	3	3	1	0	0	3	3	3	7.4	7.4	7.4	83.642	747	747;764	2.29		10	4		0	By matching	By matching	By matching	By MS/MS	By MS/MS	By MS/MS	2	0	0	4.8
gi|20139133|sp|Q9BZF3.1|OSBL6_HUMAN	gi|20139133|sp|Q9BZF3.1|OSBL6_HUMAN	3	3	3	>gi|20139133|sp|Q9BZF3.1|OSBL6_HUMAN RecName: Full=Oxysterol-binding protein-related protein 6; Short=ORP-6; Short=OSBP-related protein 6	1	3	3	3	0	0	0	3	3	2	0	0	0	3	3	2	0	0	0	3	3	2	4.9	4.9	4.9	106.3	934	934	3			8		0	By matching	By matching	By matching	By MS/MS	By MS/MS	By MS/MS	0	0	0	4.9
gi|20139176|sp|Q9H4L5.1|OSBL3_HUMAN	gi|20139176|sp|Q9H4L5.1|OSBL3_HUMAN	2	2	2	>gi|20139176|sp|Q9H4L5.1|OSBL3_HUMAN RecName: Full=Oxysterol-binding protein-related protein 3; Short=ORP-3; Short=OSBP-related protein 3	1	2	2	2	0	0	0	2	1	2	0	0	0	2	1	2	0	0	0	2	1	2	3.6	3.6	3.6	101.22	887	887	3			6		0	By matching	By matching	By matching	By matching	By MS/MS	By MS/MS	0	0	0	3.6
gi|20139242|sp|Q9P0J0.3|NDUAD_HUMAN	gi|20139242|sp|Q9P0J0.3|NDUAD_HUMAN	3	3	3	>gi|20139242|sp|Q9P0J0.3|NDUAD_HUMAN RecName: Full=NADH dehydrogenase [ubiquinone] 1 alpha subcomplex subunit 13; AltName: Full=Cell death regulatory protein GRIM-19; AltName: Full=Complex I-B16.6; Short=CI-B16.6; AltName: Full=Gene associated with retinoi	1	3	3	3	0	0	0	3	3	3	0	0	0	3	3	3	0	0	0	3	3	3	29.9	29.9	29.9	16.698	144	144	1	9				0	By matching	By matching	By matching	By MS/MS	By MS/MS	By MS/MS	0	0	0	29.9
gi|20139303|sp|Q9Y619.1|ORNT1_HUMAN	gi|20139303|sp|Q9Y619.1|ORNT1_HUMAN	1	1	1	>gi|20139303|sp|Q9Y619.1|ORNT1_HUMAN RecName: Full=Mitochondrial ornithine transporter 1; AltName: Full=Solute carrier family 25 member 15	1	1	1	1	0	0	0	1	1	0	0	0	0	1	1	0	0	0	0	1	1	0	4	4	4	32.736	301	301	1	2				1	By matching	By matching	By matching	By matching	By MS/MS	By matching	0	0	0	4
gi|20139693|sp|Q9BZG1.1|RAB34_HUMAN	gi|20139693|sp|Q9BZG1.1|RAB34_HUMAN	2	2	2	>gi|20139693|sp|Q9BZG1.1|RAB34_HUMAN RecName: Full=Ras-related protein Rab-34; AltName: Full=Ras-related protein Rab-39; AltName: Full=Ras-related protein Rah	1	2	2	2	0	0	0	1	2	0	0	0	0	1	2	0	0	0	0	1	2	0	9.7	9.7	9.7	29.044	259	259	2	2			1	0	By matching	By matching	By matching	By matching	By MS/MS	By matching	0	0	0	5.4
gi|20140017|sp|P82664.2|RT10_HUMAN	gi|20140017|sp|P82664.2|RT10_HUMAN	1	1	1	>gi|20140017|sp|P82664.2|RT10_HUMAN RecName: Full=28S ribosomal protein S10, mitochondrial; Short=MRP-S10; Short=S10mt	1	1	1	1	0	0	0	0	1	0	0	0	0	0	1	0	0	0	0	0	1	0	6	6	6	22.999	201	201	1	1				1	By matching	By matching	By matching	By matching	By MS/MS	By matching	0	0	0	0
gi|20140139|sp|Q96C19.1|EFHD2_HUMAN	gi|20140139|sp|Q96C19.1|EFHD2_HUMAN	2	2	2	>gi|20140139|sp|Q96C19.1|EFHD2_HUMAN RecName: Full=EF-hand domain-containing protein D2; AltName: Full=Swiprosin-1	1	2	2	2	0	0	0	1	2	1	0	0	0	1	2	1	0	0	0	1	2	1	11.7	11.7	11.7	26.697	240	240	1	4				0	By matching	By matching	By matching	By MS/MS	By MS/MS	By MS/MS	0	0	0	5
gi|20140145|sp|Q96P63.1|SPB12_HUMAN	gi|20140145|sp|Q96P63.1|SPB12_HUMAN	2	2	2	>gi|20140145|sp|Q96P63.1|SPB12_HUMAN RecName: Full=Serpin B12	1	2	2	2	2	1	0	1	2	2	2	1	0	1	2	2	2	1	0	1	2	2	6.4	6.4	6.4	46.276	405	405	2.3	2	4	3	1	0	By MS/MS	By matching	By matching	By matching	By MS/MS	By MS/MS	6.4	2.5	0	4
gi|20140250|sp|Q9H9B4.4|SFXN1_HUMAN;gi|308153497|sp|Q9BWM7.2|SFXN3_HUMAN	gi|20140250|sp|Q9H9B4.4|SFXN1_HUMAN	9;1	9;1	9;1	>gi|20140250|sp|Q9H9B4.4|SFXN1_HUMAN RecName: Full=Sideroflexin-1; AltName: Full=Tricarboxylate carrier protein; Short=TCC	2	9	9	9	0	1	0	8	8	9	0	1	0	8	8	9	0	1	0	8	8	9	33.9	33.9	33.9	35.619	322	322;325	1.13	26	4			0	By matching	By matching	By matching	By MS/MS	By MS/MS	By MS/MS	0	3.1	0	30.1
gi|20140568|sp|Q13148.1|TADBP_HUMAN	gi|20140568|sp|Q13148.1|TADBP_HUMAN	3	3	3	>gi|20140568|sp|Q13148.1|TADBP_HUMAN RecName: Full=TAR DNA-binding protein 43; Short=TDP-43	1	3	3	3	1	0	2	3	3	1	1	0	2	3	3	1	1	0	2	3	3	1	9.4	9.4	9.4	44.739	414	414	1.93	4	7	3		0	By matching	By matching	By matching	By MS/MS	By MS/MS	By MS/MS	4.3	0	6.5	9.4
gi|20140700|sp|Q96RU2.1|UBP28_HUMAN	gi|20140700|sp|Q96RU2.1|UBP28_HUMAN	7	7	7	>gi|20140700|sp|Q96RU2.1|UBP28_HUMAN RecName: Full=Ubiquitin carboxyl-terminal hydrolase 28; AltName: Full=Deubiquitinating enzyme 28; AltName: Full=Ubiquitin thioesterase 28; AltName: Full=Ubiquitin-specific-processing protease 28	1	7	7	7	0	0	0	6	7	7	0	0	0	6	7	7	0	0	0	6	7	7	9.4	9.4	9.4	122.49	1077	1077	3			20		0	By matching	By matching	By matching	By MS/MS	By MS/MS	By MS/MS	0	0	0	7.9
gi|20140802|sp|Q9GZL7.2|WDR12_HUMAN	gi|20140802|sp|Q9GZL7.2|WDR12_HUMAN	3	3	3	>gi|20140802|sp|Q9GZL7.2|WDR12_HUMAN RecName: Full=Ribosome biogenesis protein WDR12; AltName: Full=WD repeat-containing protein 12	1	3	3	3	0	0	0	2	2	3	0	0	0	2	2	3	0	0	0	2	2	3	13	13	13	47.707	423	423	4				7	0	By matching	By matching	By matching	By MS/MS	By MS/MS	By MS/MS	0	0	0	9.9
gi|20140803|sp|Q9H0E2.1|TOLIP_HUMAN	gi|20140803|sp|Q9H0E2.1|TOLIP_HUMAN	2	2	2	>gi|20140803|sp|Q9H0E2.1|TOLIP_HUMAN RecName: Full=Toll-interacting protein	1	2	2	2	0	0	0	2	2	2	0	0	0	2	2	2	0	0	0	2	2	2	11.3	11.3	11.3	30.281	274	274	1	6				0	By matching	By matching	By matching	By MS/MS	By matching	By matching	0	0	0	11.3
gi|20141195|sp|P00966.2|ASSY_HUMAN	gi|20141195|sp|P00966.2|ASSY_HUMAN	2	2	2	>gi|20141195|sp|P00966.2|ASSY_HUMAN RecName: Full=Argininosuccinate synthase; AltName: Full=Citrulline--aspartate ligase	1	2	2	2	0	0	0	2	2	1	0	0	0	2	2	1	0	0	0	2	2	1	5.1	5.1	5.1	46.53	412	412	1.5	3	3			0.0094824	By matching	By matching	By matching	By MS/MS	By matching	By MS/MS	0	0	0	5.1
gi|20141241|sp|P50454.2|SERPH_HUMAN	gi|20141241|sp|P50454.2|SERPH_HUMAN	7	7	7	>gi|20141241|sp|P50454.2|SERPH_HUMAN RecName: Full=Serpin H1; AltName: Full=47 kDa heat shock protein; AltName: Full=Arsenic-transactivated protein 3; Short=AsTP3; AltName: Full=Cell proliferation-inducing gene 14 protein; AltName: Full=Collagen-binding pr	1	7	7	7	1	1	0	7	7	7	1	1	0	7	7	7	1	1	0	7	7	7	26.6	26.6	26.6	46.44	418	418	3.02	1	18	1	21	0	By matching	By matching	By matching	By MS/MS	By MS/MS	By MS/MS	5.3	5.3	0	26.6
gi|20141265|sp|Q16186.2|ADRM1_HUMAN	gi|20141265|sp|Q16186.2|ADRM1_HUMAN	2	2	2	>gi|20141265|sp|Q16186.2|ADRM1_HUMAN RecName: Full=Proteasomal ubiquitin receptor ADRM1; AltName: Full=110 kDa cell membrane glycoprotein; Short=Gp110; AltName: Full=Adhesion-regulating molecule 1; Short=ARM-1; AltName: Full=Proteasome regulatory particle	1	2	2	2	0	0	0	2	2	2	0	0	0	2	2	2	0	0	0	2	2	2	8.6	8.6	8.6	42.153	407	407	2		6			0	By matching	By matching	By matching	By MS/MS	By MS/MS	By MS/MS	0	0	0	8.6
gi|20141285|sp|Q9Y696.4|CLIC4_HUMAN	gi|20141285|sp|Q9Y696.4|CLIC4_HUMAN	5	5	5	>gi|20141285|sp|Q9Y696.4|CLIC4_HUMAN RecName: Full=Chloride intracellular channel protein 4; AltName: Full=Intracellular chloride ion channel protein p64H1	1	5	5	5	0	0	1	5	4	3	0	0	1	5	4	3	0	0	1	5	4	3	25.3	25.3	25.3	28.772	253	253	1	15				0	By matching	By matching	By matching	By MS/MS	By MS/MS	By MS/MS	0	0	4.7	25.3
gi|20141302|sp|P81605.2|DCD_HUMAN	gi|20141302|sp|P81605.2|DCD_HUMAN	2	2	2	>gi|20141302|sp|P81605.2|DCD_HUMAN RecName: Full=Dermcidin; AltName: Full=Preproteolysin; Contains: RecName: Full=Survival-promoting peptide; Contains: RecName: Full=DCD-1; Flags: Precursor	1	2	2	2	2	2	1	1	2	2	2	2	1	1	2	2	2	2	1	1	2	2	12.7	12.7	12.7	11.284	110	110	2.33	6	3	6	3	0	By MS/MS	By MS/MS	By matching	By matching	By MS/MS	By MS/MS	12.7	12.7	10	12.7
gi|20141308|sp|O00165.2|HAX1_HUMAN	gi|20141308|sp|O00165.2|HAX1_HUMAN	5	5	5	>gi|20141308|sp|O00165.2|HAX1_HUMAN RecName: Full=HCLS1-associated protein X-1; AltName: Full=HS1-associating protein X-1; Short=HAX-1; AltName: Full=HS1-binding protein 1; Short=HSP1BP-1	1	5	5	5	0	0	0	5	5	5	0	0	0	5	5	5	0	0	0	5	5	5	24.7	24.7	24.7	31.62	279	279	1	15				0	By matching	By matching	By matching	By MS/MS	By MS/MS	By MS/MS	0	0	0	24.7
gi|20141332|sp|P10606.2|COX5B_HUMAN	gi|20141332|sp|P10606.2|COX5B_HUMAN	2	2	2	>gi|20141332|sp|P10606.2|COX5B_HUMAN RecName: Full=Cytochrome c oxidase subunit 5B, mitochondrial; AltName: Full=Cytochrome c oxidase polypeptide Vb; Flags: Precursor	1	2	2	2	0	0	0	2	2	2	0	0	0	2	2	2	0	0	0	2	2	2	9.3	9.3	9.3	13.696	129	129	1	6				0	By matching	By matching	By matching	By matching	By MS/MS	By matching	0	0	0	9.3
gi|20141357|sp|P29692.5|EF1D_HUMAN	gi|20141357|sp|P29692.5|EF1D_HUMAN	8	8	8	>gi|20141357|sp|P29692.5|EF1D_HUMAN RecName: Full=Elongation factor 1-delta; Short=EF-1-delta; AltName: Full=Antigen NY-CO-4	1	8	8	8	1	1	2	7	7	7	1	1	2	7	7	7	1	1	2	7	7	7	42.7	42.7	42.7	31.121	281	281	1.51	27	13	5		0	By MS/MS	By MS/MS	By MS/MS	By MS/MS	By MS/MS	By MS/MS	4.3	4.3	12.8	42.3
gi|20141376|sp|P40939.2|ECHA_HUMAN	gi|20141376|sp|P40939.2|ECHA_HUMAN	19	19	19	>gi|20141376|sp|P40939.2|ECHA_HUMAN RecName: Full=Trifunctional enzyme subunit alpha, mitochondrial; AltName: Full=78 kDa gastrin-binding protein; AltName: Full=TP-alpha; Includes: RecName: Full=Long-chain enoyl-CoA hydratase; Includes: RecName: Full=Long	1	19	19	19	6	4	4	17	18	14	6	4	4	17	18	14	6	4	4	17	18	14	33.9	33.9	33.9	82.999	763	763	2.26	4	69	29	1	0	By MS/MS	By MS/MS	By MS/MS	By MS/MS	By MS/MS	By MS/MS	9.7	7.5	6.4	30.5
gi|20141421|sp|Q15392.2|DHC24_HUMAN	gi|20141421|sp|Q15392.2|DHC24_HUMAN	1	1	1	>gi|20141421|sp|Q15392.2|DHC24_HUMAN RecName: Full=Delta(24)-sterol reductase; AltName: Full=24-dehydrocholesterol reductase; AltName: Full=3-beta-hydroxysterol delta-24-reductase; AltName: Full=Diminuto/dwarf1 homolog; AltName: Full=Seladin-1; Flags: Prec	1	1	1	1	1	1	1	1	1	1	1	1	1	1	1	1	1	1	1	1	1	1	2.7	2.7	2.7	60.101	516	516	4				6	1	By matching	By matching	By matching	By matching	By matching	By MS/MS	2.7	2.7	2.7	2.7
gi|20141468|sp|Q14739.2|LBR_HUMAN	gi|20141468|sp|Q14739.2|LBR_HUMAN	5	5	5	>gi|20141468|sp|Q14739.2|LBR_HUMAN RecName: Full=Lamin-B receptor; AltName: Full=Integral nuclear envelope inner membrane protein; AltName: Full=LMN2R	1	5	5	5	1	0	0	5	5	4	1	0	0	5	5	4	1	0	0	5	5	4	12	12	12	70.702	615	615	2.48		14	4	3	0	By matching	By matching	By matching	By MS/MS	By MS/MS	By MS/MS	1.8	0	0	12
gi|20141471|sp|O00505.2|IMA4_HUMAN	gi|20141471|sp|O00505.2|IMA4_HUMAN	2	2	2	>gi|20141471|sp|O00505.2|IMA4_HUMAN RecName: Full=Importin subunit alpha-4; AltName: Full=Importin alpha Q2; Short=Qip2; AltName: Full=Karyopherin subunit alpha-3; AltName: Full=SRP1-gamma	1	2	2	2	0	1	0	2	2	1	0	1	0	2	2	1	0	1	0	2	2	1	5.2	5.2	5.2	57.81	521	521	2		6			0	By matching	By matching	By matching	By MS/MS	By MS/MS	By MS/MS	0	2.7	0	5.2
gi|20141568|sp|P48735.2|IDHP_HUMAN	gi|20141568|sp|P48735.2|IDHP_HUMAN	6	6	6	>gi|20141568|sp|P48735.2|IDHP_HUMAN RecName: Full=Isocitrate dehydrogenase [NADP], mitochondrial; Short=IDH; AltName: Full=ICD-M; AltName: Full=IDP; AltName: Full=NADP(+)-specific ICDH; AltName: Full=Oxalosuccinate decarboxylase; Flags: Precursor	1	6	6	6	1	1	2	4	6	6	1	1	2	4	6	6	1	1	2	4	6	6	17.3	17.3	17.3	50.909	452	452	2.78	1	17	2	12	0	By matching	By matching	By MS/MS	By MS/MS	By MS/MS	By MS/MS	3.8	3.8	6.6	11.5
gi|20141580|sp|Q02978.3|M2OM_HUMAN	gi|20141580|sp|Q02978.3|M2OM_HUMAN	6	6	6	>gi|20141580|sp|Q02978.3|M2OM_HUMAN RecName: Full=Mitochondrial 2-oxoglutarate/malate carrier protein; Short=OGCP; AltName: Full=Solute carrier family 25 member 11	1	6	6	6	1	1	1	6	6	6	1	1	1	6	6	6	1	1	1	6	6	6	29.3	29.3	29.3	34.061	314	314	1.28	25	5	2		0	By MS/MS	By matching	By MS/MS	By MS/MS	By MS/MS	By MS/MS	5.1	5.1	5.1	29.3
gi|20141582|sp|Q04759.3|KPCT_HUMAN	gi|20141582|sp|Q04759.3|KPCT_HUMAN	1	1	1	>gi|20141582|sp|Q04759.3|KPCT_HUMAN RecName: Full=Protein kinase C theta type; AltName: Full=nPKC-theta	1	1	1	1	0	0	0	0	1	1	0	0	0	0	1	1	0	0	0	0	1	1	2.5	2.5	2.5	81.864	706	706	4				2	1	By matching	By matching	By matching	By matching	By MS/MS	By matching	0	0	0	0
gi|20141613|sp|Q9UGV2.2|NDRG3_HUMAN	gi|20141613|sp|Q9UGV2.2|NDRG3_HUMAN	2	2	2	>gi|20141613|sp|Q9UGV2.2|NDRG3_HUMAN RecName: Full=Protein NDRG3; AltName: Full=N-myc downstream-regulated gene 3 protein	1	2	2	2	0	0	0	1	2	1	0	0	0	1	2	1	0	0	0	1	2	1	8.3	8.3	8.3	41.408	375	375	2		4			0	By matching	By matching	By matching	By MS/MS	By MS/MS	By MS/MS	0	0	0	4
gi|20141615|sp|Q9UN36.2|NDRG2_HUMAN	gi|20141615|sp|Q9UN36.2|NDRG2_HUMAN	2	2	2	>gi|20141615|sp|Q9UN36.2|NDRG2_HUMAN RecName: Full=Protein NDRG2; AltName: Full=N-myc downstream-regulated gene 2 protein; AltName: Full=Protein Syld709613	1	2	2	2	0	0	0	1	1	2	0	0	0	1	1	2	0	0	0	1	1	2	7.8	7.8	7.8	40.798	371	371	2		4			0	By matching	By matching	By matching	By MS/MS	By MS/MS	By MS/MS	0	0	0	3.8
gi|20141641|sp|P49589.3|SYCC_HUMAN	gi|20141641|sp|P49589.3|SYCC_HUMAN	5	5	5	>gi|20141641|sp|P49589.3|SYCC_HUMAN RecName: Full=Cysteine--tRNA ligase, cytoplasmic; AltName: Full=Cysteinyl-tRNA synthetase; Short=CysRS	1	5	5	5	0	0	0	5	4	4	0	0	0	5	4	4	0	0	0	5	4	4	10.4	10.4	10.4	85.472	748	748	2.12	1	13	3		0	By matching	By matching	By matching	By MS/MS	By MS/MS	By MS/MS	0	0	0	10.4
gi|20141702|sp|P23526.4|SAHH_HUMAN	gi|20141702|sp|P23526.4|SAHH_HUMAN	12	12	12	>gi|20141702|sp|P23526.4|SAHH_HUMAN RecName: Full=Adenosylhomocysteinase; Short=AdoHcyase; AltName: Full=S-adenosyl-L-homocysteine hydrolase	1	12	12	12	3	3	2	10	11	12	3	3	2	10	11	12	3	3	2	10	11	12	31	31	31	47.716	432	432	2.06	7	53	11		0	By MS/MS	By MS/MS	By matching	By MS/MS	By MS/MS	By MS/MS	8.1	9.5	4.9	23.6
gi|20141794|sp|Q15437.2|SC23B_HUMAN	gi|20141794|sp|Q15437.2|SC23B_HUMAN	3	1	1	>gi|20141794|sp|Q15437.2|SC23B_HUMAN RecName: Full=Protein transport protein Sec23B; AltName: Full=SEC23-related protein B	1	3	1	1	0	0	0	3	2	3	0	0	0	1	1	1	0	0	0	1	1	1	5.1	1.7	1.7	86.478	767	767	2		3			0	By matching	By matching	By matching	By MS/MS	By MS/MS	By matching	0	0	0	5.1
gi|20141815|sp|Q9Y617.2|SERC_HUMAN	gi|20141815|sp|Q9Y617.2|SERC_HUMAN	14	14	14	>gi|20141815|sp|Q9Y617.2|SERC_HUMAN RecName: Full=Phosphoserine aminotransferase; AltName: Full=Phosphohydroxythreonine aminotransferase; Short=PSAT	1	14	14	14	0	0	0	13	14	14	0	0	0	13	14	14	0	0	0	13	14	14	47	47	47	40.422	370	370	1.94	4	48	1		0	By matching	By matching	By matching	By MS/MS	By MS/MS	By MS/MS	0	0	0	43.5
gi|20141931|sp|P53007.2|TXTP_HUMAN	gi|20141931|sp|P53007.2|TXTP_HUMAN	4	4	4	>gi|20141931|sp|P53007.2|TXTP_HUMAN RecName: Full=Tricarboxylate transport protein, mitochondrial; AltName: Full=Citrate transport protein; Short=CTP; AltName: Full=Solute carrier family 25 member 1; AltName: Full=Tricarboxylate carrier protein; Flags: Pre	1	4	4	4	0	0	0	3	4	3	0	0	0	3	4	3	0	0	0	3	4	3	13.8	13.8	13.8	34.012	311	311	1.62	10	2	4		0	By matching	By matching	By matching	By MS/MS	By MS/MS	By MS/MS	0	0	0	11.3
gi|20141943|sp|P57081.2|WDR4_HUMAN	gi|20141943|sp|P57081.2|WDR4_HUMAN	2	2	2	>gi|20141943|sp|P57081.2|WDR4_HUMAN RecName: Full=tRNA (guanine-N(7)-)-methyltransferase non-catalytic subunit WDR4; AltName: Full=WD repeat-containing protein 4	1	2	2	2	0	0	0	2	2	2	0	0	0	2	2	2	0	0	0	2	2	2	7.8	7.8	7.8	45.489	412	412	2		6			0	By matching	By matching	By matching	By MS/MS	By MS/MS	By MS/MS	0	0	0	7.8
gi|20143880|sp|Q9BXW6.2|OSBL1_HUMAN	gi|20143880|sp|Q9BXW6.2|OSBL1_HUMAN	2	2	2	>gi|20143880|sp|Q9BXW6.2|OSBL1_HUMAN RecName: Full=Oxysterol-binding protein-related protein 1; Short=ORP-1; Short=OSBP-related protein 1	1	2	2	2	0	0	0	1	1	2	0	0	0	1	1	2	0	0	0	1	1	2	3.5	3.5	3.5	108.47	950	950	3			4		0	By matching	By matching	By matching	By MS/MS	By MS/MS	By MS/MS	0	0	0	1.7
gi|20177842|sp|Q9BXW7.1|CECR5_HUMAN	gi|20177842|sp|Q9BXW7.1|CECR5_HUMAN	5	5	5	>gi|20177842|sp|Q9BXW7.1|CECR5_HUMAN RecName: Full=Cat eye syndrome critical region protein 5; Flags: Precursor	1	5	5	5	0	0	0	5	4	5	0	0	0	5	4	5	0	0	0	5	4	5	19.4	19.4	19.4	46.321	423	423	2		17			0	By matching	By matching	By matching	By MS/MS	By MS/MS	By MS/MS	0	0	0	19.4
gi|20177874|sp|Q9Y3C6.1|PPIL1_HUMAN	gi|20177874|sp|Q9Y3C6.1|PPIL1_HUMAN	1	1	1	>gi|20177874|sp|Q9Y3C6.1|PPIL1_HUMAN RecName: Full=Peptidyl-prolyl cis-trans isomerase-like 1; Short=PPIase; AltName: Full=Rotamase PPIL1	1	1	1	1	0	0	0	1	0	1	0	0	0	1	0	1	0	0	0	1	0	1	10.2	10.2	10.2	18.237	166	166	1	2				0.0076152	By matching	By matching	By matching	By MS/MS	By matching	By matching	0	0	0	10.2
gi|20178058|sp|Q9BW83.1|IFT27_HUMAN	gi|20178058|sp|Q9BW83.1|IFT27_HUMAN	2	2	2	>gi|20178058|sp|Q9BW83.1|IFT27_HUMAN RecName: Full=Intraflagellar transport protein 27 homolog; AltName: Full=Putative GTP-binding protein RAY-like; AltName: Full=Rab-like protein 4	1	2	2	2	0	0	0	2	2	2	0	0	0	2	2	2	0	0	0	2	2	2	15.6	15.6	15.6	20.48	186	186	1	6				0	By matching	By matching	By matching	By MS/MS	By MS/MS	By MS/MS	0	0	0	15.6
gi|20178118|sp|Q9HCY8.1|S10AE_HUMAN	gi|20178118|sp|Q9HCY8.1|S10AE_HUMAN	2	2	2	>gi|20178118|sp|Q9HCY8.1|S10AE_HUMAN RecName: Full=Protein S100-A14; AltName: Full=S100 calcium-binding protein A14; Short=S114	1	2	2	2	1	1	2	0	1	2	1	1	2	0	1	2	1	1	2	0	1	2	25	25	25	11.662	104	104	1.91	5	2	4		0	By MS/MS	By MS/MS	By MS/MS	By matching	By matching	By MS/MS	14.4	14.4	25	0
gi|20178276|sp|P54646.2|AAPK2_HUMAN	gi|20178276|sp|P54646.2|AAPK2_HUMAN	3	3	1	>gi|20178276|sp|P54646.2|AAPK2_HUMAN RecName: Full=5-AMP-activated protein kinase catalytic subunit alpha-2; Short=AMPK subunit alpha-2; AltName: Full=Acetyl-CoA carboxylase kinase; Short=ACACA kinase; AltName: Full=Hydroxymethylglutaryl-CoA reductase kin	1	3	3	1	0	0	0	3	3	1	0	0	0	3	3	1	0	0	0	1	1	1	8	8	1.8	62.319	552	552	2.3		7	3		0	By matching	By matching	By matching	By MS/MS	By MS/MS	By matching	0	0	0	8
gi|20178280|sp|P02679.3|FIBG_HUMAN	gi|20178280|sp|P02679.3|FIBG_HUMAN	18	18	18	>gi|20178280|sp|P02679.3|FIBG_HUMAN RecName: Full=Fibrinogen gamma chain; Flags: Precursor	1	18	18	18	0	0	18	0	0	0	0	0	18	0	0	0	0	0	18	0	0	0	51.9	51.9	51.9	51.511	453	453	1	31				0	By matching	By matching	By MS/MS	By matching	By matching	By matching	0	0	51.9	0
gi|20178281|sp|P02747.3|C1QC_HUMAN	gi|20178281|sp|P02747.3|C1QC_HUMAN	1	1	1	>gi|20178281|sp|P02747.3|C1QC_HUMAN RecName: Full=Complement C1q subcomponent subunit C; Flags: Precursor	1	1	1	1	0	0	1	0	0	0	0	0	1	0	0	0	0	0	1	0	0	0	7.3	7.3	7.3	25.773	245	245	1	1				0	By matching	By matching	By MS/MS	By matching	By matching	By matching	0	0	7.3	0
gi|20178296|sp|P14618.4|KPYM_HUMAN;gi|8247933|sp|P30613.2|KPYR_HUMAN	gi|20178296|sp|P14618.4|KPYM_HUMAN	31;1	31;1	31;1	>gi|20178296|sp|P14618.4|KPYM_HUMAN RecName: Full=Pyruvate kinase PKM; AltName: Full=Cytosolic thyroid hormone-binding protein; Short=CTHBP; AltName: Full=Opa-interacting protein 3; Short=OIP-3; AltName: Full=Pyruvate kinase 2/3; AltName: Full=Pyruvate kin	2	31	31	31	6	9	11	28	30	30	6	9	11	28	30	30	6	9	11	28	30	30	62.5	62.5	62.5	57.936	531	531;574	2.32	20	180	70	21	0	By MS/MS	By MS/MS	By MS/MS	By MS/MS	By MS/MS	By MS/MS	15.4	24.7	24.3	54.2
gi|20178306|sp|Q15418.2|KS6A1_HUMAN	gi|20178306|sp|Q15418.2|KS6A1_HUMAN	2	2	2	>gi|20178306|sp|Q15418.2|KS6A1_HUMAN RecName: Full=Ribosomal protein S6 kinase alpha-1; Short=S6K-alpha-1; AltName: Full=90 kDa ribosomal protein S6 kinase 1; Short=p90-RSK 1; Short=p90RSK1; Short=p90S6K; AltName: Full=MAP kinase-activated protein kinase 1	1	2	2	2	0	0	0	0	1	1	0	0	0	0	1	1	0	0	0	0	1	1	3.9	3.9	3.9	82.722	735	735	2	1	2	1		0.00045351	By matching	By matching	By matching	By matching	By MS/MS	By MS/MS	0	0	0	0
gi|20178311|sp|P46781.3|RS9_HUMAN	gi|20178311|sp|P46781.3|RS9_HUMAN	9	9	9	>gi|20178311|sp|P46781.3|RS9_HUMAN RecName: Full=40S ribosomal protein S9	1	9	9	9	1	0	3	7	9	7	1	0	3	7	9	7	1	0	3	7	9	7	27.8	27.8	27.8	22.591	194	194	1.59	28	8	6	2	0	By matching	By matching	By matching	By MS/MS	By MS/MS	By MS/MS	4.1	0	14.9	23.7
gi|20178312|sp|O00151.4|PDLI1_HUMAN	gi|20178312|sp|O00151.4|PDLI1_HUMAN	10	10	10	>gi|20178312|sp|O00151.4|PDLI1_HUMAN RecName: Full=PDZ and LIM domain protein 1; AltName: Full=C-terminal LIM domain protein 1; AltName: Full=Elfin; AltName: Full=LIM domain protein CLP-36	1	10	10	10	0	1	0	9	10	10	0	1	0	9	10	10	0	1	0	9	10	10	51.7	51.7	51.7	36.071	329	329	2.11	11	37	10	4	0	By matching	By matching	By matching	By MS/MS	By MS/MS	By MS/MS	0	4.9	0	46.8
gi|20178314|sp|O75306.2|NDUS2_HUMAN	gi|20178314|sp|O75306.2|NDUS2_HUMAN	6	6	6	>gi|20178314|sp|O75306.2|NDUS2_HUMAN RecName: Full=NADH dehydrogenase [ubiquinone] iron-sulfur protein 2, mitochondrial; AltName: Full=Complex I-49kD; Short=CI-49kD; AltName: Full=NADH-ubiquinone oxidoreductase 49 kDa subunit; Flags: Precursor	1	6	6	6	0	0	0	5	5	6	0	0	0	5	5	6	0	0	0	5	5	6	19.4	19.4	19.4	52.545	463	463	2.06		16	1		0	By matching	By matching	By matching	By MS/MS	By MS/MS	By MS/MS	0	0	0	17.7
gi|20178315|sp|O95340.2|PAPS2_HUMAN	gi|20178315|sp|O95340.2|PAPS2_HUMAN	2	2	2	>gi|20178315|sp|O95340.2|PAPS2_HUMAN RecName: Full=Bifunctional 3-phosphoadenosine 5-phosphosulfate synthase 2; Short=PAPS synthase 2; Short=PAPSS 2; AltName: Full=Sulfurylase kinase 2; Short=SK 2; Short=SK2; Includes: RecName: Full=Sulfate adenylyltrans	1	2	2	2	0	0	0	2	1	1	0	0	0	2	1	1	0	0	0	2	1	1	5.9	5.9	5.9	69.5	614	614	2.29		6		1	0	By matching	By matching	By matching	By MS/MS	By MS/MS	By matching	0	0	0	5.9
gi|20178317|sp|P11216.5|PYGB_HUMAN	gi|20178317|sp|P11216.5|PYGB_HUMAN	6	3	3	>gi|20178317|sp|P11216.5|PYGB_HUMAN RecName: Full=Glycogen phosphorylase, brain form	1	6	3	3	1	0	0	4	6	5	1	0	0	1	3	2	1	0	0	1	3	2	10.7	6.3	6.3	96.695	843	843	2.12	1	5	2		0	By matching	By matching	By matching	By matching	By MS/MS	By MS/MS	1.7	0	0	6
gi|20178322|sp|P35080.3|PROF2_HUMAN	gi|20178322|sp|P35080.3|PROF2_HUMAN	2	2	2	>gi|20178322|sp|P35080.3|PROF2_HUMAN RecName: Full=Profilin-2; AltName: Full=Profilin II	1	2	2	2	0	0	0	2	2	2	0	0	0	2	2	2	0	0	0	2	2	2	20	20	20	15.046	140	140	1.14	6	1			0	By matching	By matching	By matching	By MS/MS	By MS/MS	By MS/MS	0	0	0	20
gi|20178325|sp|P52434.4|RPAB3_HUMAN	gi|20178325|sp|P52434.4|RPAB3_HUMAN	3	3	3	>gi|20178325|sp|P52434.4|RPAB3_HUMAN RecName: Full=DNA-directed RNA polymerases I, II, and III subunit RPABC3; Short=RNA polymerases I, II, and III subunit ABC3; AltName: Full=DNA-directed RNA polymerase II subunit H; AltName: Full=DNA-directed RNA polymer	1	3	3	3	0	0	0	3	0	1	0	0	0	3	0	1	0	0	0	3	0	1	26.7	26.7	26.7	17.143	150	150	1	4				0	By matching	By matching	By matching	By MS/MS	By matching	By MS/MS	0	0	0	26.7
gi|20178330|sp|P14868.2|SYDC_HUMAN	gi|20178330|sp|P14868.2|SYDC_HUMAN	21	21	21	>gi|20178330|sp|P14868.2|SYDC_HUMAN RecName: Full=Aspartate--tRNA ligase, cytoplasmic; AltName: Full=Aspartyl-tRNA synthetase; Short=AspRS; AltName: Full=Cell proliferation-inducing gene 40 protein	1	21	21	21	1	2	3	21	21	21	1	2	3	21	21	21	1	2	3	21	21	21	48.9	48.9	48.9	57.136	501	501	2.99	1	54	31	55	0	By matching	By MS/MS	By matching	By MS/MS	By MS/MS	By MS/MS	2	5.6	5.8	48.9
gi|20178331|sp|P54136.2|SYRC_HUMAN	gi|20178331|sp|P54136.2|SYRC_HUMAN	20	20	20	>gi|20178331|sp|P54136.2|SYRC_HUMAN RecName: Full=Arginine--tRNA ligase, cytoplasmic; AltName: Full=Arginyl-tRNA synthetase; Short=ArgRS	1	20	20	20	2	0	1	18	19	17	2	0	1	18	19	17	2	0	1	18	19	17	38.2	38.2	38.2	75.378	660	660	2.16	5	61	19		0	By matching	By matching	By matching	By MS/MS	By MS/MS	By MS/MS	3.5	0	3	34.5
gi|20178332|sp|P56192.2|SYMC_HUMAN	gi|20178332|sp|P56192.2|SYMC_HUMAN	25	25	25	>gi|20178332|sp|P56192.2|SYMC_HUMAN RecName: Full=Methionine--tRNA ligase, cytoplasmic; AltName: Full=Methionyl-tRNA synthetase; Short=MetRS	1	25	25	25	4	0	2	23	22	23	4	0	2	23	22	23	4	0	2	23	22	23	40.9	40.9	40.9	101.11	900	900	2.89		13	88	2	0	By MS/MS	By matching	By MS/MS	By MS/MS	By MS/MS	By MS/MS	5.2	0	2.8	37.7
gi|20178333|sp|Q15046.3|SYK_HUMAN	gi|20178333|sp|Q15046.3|SYK_HUMAN	10	10	10	>gi|20178333|sp|Q15046.3|SYK_HUMAN RecName: Full=Lysine--tRNA ligase; AltName: Full=Lysyl-tRNA synthetase; Short=LysRS	1	10	10	10	1	1	0	8	9	9	1	1	0	8	9	9	1	1	0	8	9	9	21.8	21.8	21.8	68.047	597	597	2.09		31	3		0	By matching	By MS/MS	By matching	By MS/MS	By MS/MS	By MS/MS	2.7	2.7	0	14.9
gi|20178343|sp|Q14141.4|SEPT6_HUMAN	gi|20178343|sp|Q14141.4|SEPT6_HUMAN	5	4	4	>gi|20178343|sp|Q14141.4|SEPT6_HUMAN RecName: Full=Septin-6	1	5	4	4	0	0	0	5	5	5	0	0	0	4	4	4	0	0	0	4	4	4	16.1	13.6	13.6	49.716	434	434	4				12	0	By matching	By matching	By matching	By MS/MS	By MS/MS	By MS/MS	0	0	0	16.1
gi|20454906|sp|Q9UNN5.2|FAF1_HUMAN	gi|20454906|sp|Q9UNN5.2|FAF1_HUMAN	13	13	13	>gi|20454906|sp|Q9UNN5.2|FAF1_HUMAN RecName: Full=FAS-associated factor 1; Short=hFAF1; AltName: Full=UBX domain-containing protein 12; AltName: Full=UBX domain-containing protein 3A	1	13	13	13	0	0	0	10	13	12	0	0	0	10	13	12	0	0	0	10	13	12	24.3	24.3	24.3	73.953	650	650	2	2	37	2		0	By matching	By matching	By matching	By MS/MS	By MS/MS	By MS/MS	0	0	0	21.5
gi|20455027|sp|Q9UJ83.2|HACL1_HUMAN	gi|20455027|sp|Q9UJ83.2|HACL1_HUMAN	1	1	1	>gi|20455027|sp|Q9UJ83.2|HACL1_HUMAN RecName: Full=2-hydroxyacyl-CoA lyase 1; AltName: Full=2-hydroxyphytanoyl-CoA lyase; Short=2-HPCL; AltName: Full=Phytanoyl-CoA 2-hydroxylase 2	1	1	1	1	0	0	0	1	1	1	0	0	0	1	1	1	0	0	0	1	1	1	2.1	2.1	2.1	63.728	578	578	2		3			0.00044663	By matching	By matching	By matching	By MS/MS	By MS/MS	By matching	0	0	0	2.1
gi|20455184|sp|Q9BW91.1|NUDT9_HUMAN	gi|20455184|sp|Q9BW91.1|NUDT9_HUMAN	1	1	1	>gi|20455184|sp|Q9BW91.1|NUDT9_HUMAN RecName: Full=ADP-ribose pyrophosphatase, mitochondrial; AltName: Full=ADP-ribose diphosphatase; AltName: Full=ADP-ribose phosphohydrolase; AltName: Full=Adenosine diphosphoribose pyrophosphatase; Short=ADPR-PPase; AltN	1	1	1	1	0	0	1	0	1	1	0	0	1	0	1	1	0	0	1	0	1	1	3.4	3.4	3.4	39.125	350	350	1.67	1	2			0	By matching	By matching	By matching	By matching	By MS/MS	By MS/MS	0	0	3.4	0
gi|20455192|sp|Q9UKK9.1|NUDT5_HUMAN	gi|20455192|sp|Q9UKK9.1|NUDT5_HUMAN	5	5	5	>gi|20455192|sp|Q9UKK9.1|NUDT5_HUMAN RecName: Full=ADP-sugar pyrophosphatase; AltName: Full=8-oxo-dGDP phosphatase; AltName: Full=Nuclear ATP-synthesis protein NUDIX5; AltName: Full=Nucleoside diphosphate-linked moiety X motif 5; Short=Nudix motif 5; Short	1	5	5	5	0	0	0	5	4	4	0	0	0	5	4	4	0	0	0	5	4	4	22.4	22.4	22.4	24.327	219	219	1.11	16	2			0	By matching	By matching	By matching	By MS/MS	By MS/MS	By MS/MS	0	0	0	22.4
gi|728048641|sp|P0DMR1.1|HNRC4_HUMAN;gi|728048439|sp|B7ZW38.1|HNRC3_HUMAN;gi|20455218|sp|O60812.1|HNRC1_HUMAN	gi|728048641|sp|P0DMR1.1|HNRC4_HUMAN;gi|728048439|sp|B7ZW38.1|HNRC3_HUMAN;gi|20455218|sp|O60812.1|HNRC1_HUMAN	5;5;5	1;1;1	1;1;1	>gi|728048641|sp|P0DMR1.1|HNRC4_HUMAN RecName: Full=Heterogeneous nuclear ribonucleoprotein C-like 4;>gi|728048439|sp|B7ZW38.1|HNRC3_HUMAN RecName: Full=Heterogeneous nuclear ribonucleoprotein C-like 3;>gi|20455218|sp|O60812.1|HNRC1_HUMAN RecName: Full=Het	3	5	1	1	1	1	1	5	5	5	0	0	0	1	1	1	0	0	0	1	1	1	17.1	5.5	5.5	32.029	293	293;293;293	2		5			0.00043764	By matching	By matching	By matching	By matching	By MS/MS	By MS/MS	4.1	4.1	4.1	17.1
gi|20455319|sp|Q92994.1|TF3B_HUMAN	gi|20455319|sp|Q92994.1|TF3B_HUMAN	1	1	1	>gi|20455319|sp|Q92994.1|TF3B_HUMAN RecName: Full=Transcription factor IIIB 90 kDa subunit; Short=TFIIIB90; Short=hTFIIIB90; AltName: Full=B-related factor 1; Short=BRF-1; Short=hBRF; AltName: Full=TAF3B2; AltName: Full=TATA box-binding protein-associated	1	1	1	1	0	0	0	1	1	0	0	0	0	1	1	0	0	0	0	1	1	0	3.5	3.5	3.5	73.839	677	677	2		2			0	By matching	By matching	By matching	By matching	By MS/MS	By matching	0	0	0	3.5
gi|20455322|sp|Q9BQE3.1|TBA1C_HUMAN;gi|187663995|sp|Q9H853.2|TBA4B_HUMAN	gi|20455322|sp|Q9BQE3.1|TBA1C_HUMAN	25;1	2;0	2;0	>gi|20455322|sp|Q9BQE3.1|TBA1C_HUMAN RecName: Full=Tubulin alpha-1C chain; AltName: Full=Alpha-tubulin 6; AltName: Full=Tubulin alpha-6 chain; Contains: RecName: Full=Detyrosinated tubulin alpha-1C chain	2	25	2	2	11	9	12	25	24	24	0	0	0	2	2	1	0	0	0	2	2	1	67.9	8	8	49.895	449	449;241	3.57		1	1	5	0	By matching	By matching	By matching	By MS/MS	By MS/MS	By MS/MS	27.4	23.4	37.9	67.9
gi|20455474|sp|P24539.2|AT5F1_HUMAN	gi|20455474|sp|P24539.2|AT5F1_HUMAN	4	4	4	>gi|20455474|sp|P24539.2|AT5F1_HUMAN RecName: Full=ATP synthase F(0) complex subunit B1, mitochondrial; AltName: Full=ATP synthase proton-transporting mitochondrial F(0) complex subunit B1; AltName: Full=ATP synthase subunit b; Short=ATPase subunit b; Flag	1	4	4	4	0	0	0	3	3	4	0	0	0	3	3	4	0	0	0	3	3	4	23	23	23	28.908	256	256	3.91			1	10	0	By matching	By matching	By matching	By MS/MS	By MS/MS	By MS/MS	0	0	0	18.4
gi|20455499|sp|P19404.2|NDUV2_HUMAN	gi|20455499|sp|P19404.2|NDUV2_HUMAN	1	1	1	>gi|20455499|sp|P19404.2|NDUV2_HUMAN RecName: Full=NADH dehydrogenase [ubiquinone] flavoprotein 2, mitochondrial; AltName: Full=NADH-ubiquinone oxidoreductase 24 kDa subunit; Flags: Precursor	1	1	1	1	0	0	0	1	1	1	0	0	0	1	1	1	0	0	0	1	1	1	4	4	4	27.391	249	249	4				3	0.0057708	By matching	By matching	By matching	By matching	By MS/MS	By MS/MS	0	0	0	4
gi|20455501|sp|P49821.4|NDUV1_HUMAN	gi|20455501|sp|P49821.4|NDUV1_HUMAN	2	2	2	>gi|20455501|sp|P49821.4|NDUV1_HUMAN RecName: Full=NADH dehydrogenase [ubiquinone] flavoprotein 1, mitochondrial; AltName: Full=Complex I-51kD; Short=CI-51kD; AltName: Full=NADH dehydrogenase flavoprotein 1; AltName: Full=NADH-ubiquinone oxidoreductase 51	1	2	2	2	0	0	0	2	2	2	0	0	0	2	2	2	0	0	0	2	2	2	7.5	7.5	7.5	50.817	464	464	4				6	0	By matching	By matching	By matching	By MS/MS	By MS/MS	By matching	0	0	0	7.5
gi|20455502|sp|P49841.2|GSK3B_HUMAN	gi|20455502|sp|P49841.2|GSK3B_HUMAN	1	1	1	>gi|20455502|sp|P49841.2|GSK3B_HUMAN RecName: Full=Glycogen synthase kinase-3 beta; Short=GSK-3 beta; AltName: Full=Serine/threonine-protein kinase GSK3B	1	1	1	1	0	0	0	1	1	1	0	0	0	1	1	1	0	0	0	1	1	1	5.7	5.7	5.7	46.744	420	420	3		2		2	0.0021277	By matching	By matching	By matching	By matching	By MS/MS	By MS/MS	0	0	0	5.7
gi|20455516|sp|P08240.2|SRPRA_HUMAN	gi|20455516|sp|P08240.2|SRPRA_HUMAN	3	3	3	>gi|20455516|sp|P08240.2|SRPRA_HUMAN RecName: Full=Signal recognition particle receptor subunit alpha; Short=SR-alpha; AltName: Full=Docking protein alpha; Short=DP-alpha	1	3	3	3	0	0	0	2	2	3	0	0	0	2	2	3	0	0	0	2	2	3	6.3	6.3	6.3	69.81	638	638	2		7			0	By matching	By matching	By matching	By MS/MS	By MS/MS	By MS/MS	0	0	0	4.2
gi|20455526|sp|Q13509.2|TBB3_HUMAN	gi|20455526|sp|Q13509.2|TBB3_HUMAN	20	7	5	>gi|20455526|sp|Q13509.2|TBB3_HUMAN RecName: Full=Tubulin beta-3 chain; AltName: Full=Tubulin beta-4 chain; AltName: Full=Tubulin beta-III	1	20	7	5	8	10	11	19	19	20	1	1	2	6	6	7	1	1	2	4	4	5	38.4	12.9	10.9	50.432	450	450	3.26	5	3	5	22	0	By matching	By matching	By matching	By MS/MS	By MS/MS	By MS/MS	19.6	19.8	26	37.8
gi|20455527|sp|Q14166.2|TTL12_HUMAN	gi|20455527|sp|Q14166.2|TTL12_HUMAN	14	14	14	>gi|20455527|sp|Q14166.2|TTL12_HUMAN RecName: Full=Tubulin--tyrosine ligase-like protein 12	1	14	14	14	0	0	1	13	13	11	0	0	1	13	13	11	0	0	1	13	13	11	26.1	26.1	26.1	74.403	644	644	2.13	1	45	6	1	0	By matching	By matching	By matching	By MS/MS	By MS/MS	By MS/MS	0	0	1.6	26.1
gi|20514971|sp|O43172.2|PRP4_HUMAN	gi|20514971|sp|O43172.2|PRP4_HUMAN	2	2	2	>gi|20514971|sp|O43172.2|PRP4_HUMAN RecName: Full=U4/U6 small nuclear ribonucleoprotein Prp4; AltName: Full=PRP4 homolog; Short=hPrp4; AltName: Full=U4/U6 snRNP 60 kDa protein; AltName: Full=WD splicing factor Prp4	1	2	2	2	0	0	0	2	2	2	0	0	0	2	2	2	0	0	0	2	2	2	5.4	5.4	5.4	58.449	522	522	2		8			0	By matching	By matching	By matching	By MS/MS	By MS/MS	By matching	0	0	0	5.4
gi|20532090|sp|Q9P0T7.1|TMEM9_HUMAN	gi|20532090|sp|Q9P0T7.1|TMEM9_HUMAN	1	1	1	>gi|20532090|sp|Q9P0T7.1|TMEM9_HUMAN RecName: Full=Transmembrane protein 9; AltName: Full=Dermal papilla-derived protein 4; Flags: Precursor	1	1	1	1	0	0	0	1	1	1	0	0	0	1	1	1	0	0	0	1	1	1	7.1	7.1	7.1	20.574	183	183	1.75	3			1	0.0098658	By matching	By matching	By matching	By matching	By matching	By MS/MS	0	0	0	7.1
gi|20532121|sp|Q969F9.1|HPS3_HUMAN	gi|20532121|sp|Q969F9.1|HPS3_HUMAN	1	1	1	>gi|20532121|sp|Q969F9.1|HPS3_HUMAN RecName: Full=Hermansky-Pudlak syndrome 3 protein	1	1	1	1	0	0	0	0	1	0	0	0	0	0	1	0	0	0	0	0	1	0	1.2	1.2	1.2	113.73	1004	1004	3			1		0	By matching	By matching	By matching	By matching	By MS/MS	By matching	0	0	0	0
gi|20532206|sp|O75832.1|PSD10_HUMAN	gi|20532206|sp|O75832.1|PSD10_HUMAN	3	3	3	>gi|20532206|sp|O75832.1|PSD10_HUMAN RecName: Full=26S proteasome non-ATPase regulatory subunit 10; AltName: Full=26S proteasome regulatory subunit p28; AltName: Full=Gankyrin; AltName: Full=p28(GANK)	1	3	3	3	0	0	0	3	3	3	0	0	0	3	3	3	0	0	0	3	3	3	18.6	18.6	18.6	24.428	226	226	4				13	0	By matching	By matching	By matching	By MS/MS	By MS/MS	By MS/MS	0	0	0	18.6
gi|20532376|sp|Q9Y4X5.2|ARI1_HUMAN	gi|20532376|sp|Q9Y4X5.2|ARI1_HUMAN	4	4	4	>gi|20532376|sp|Q9Y4X5.2|ARI1_HUMAN RecName: Full=E3 ubiquitin-protein ligase ARIH1; AltName: Full=H7-AP2; AltName: Full=HHARI; AltName: Full=Monocyte protein 6; Short=MOP-6; AltName: Full=Protein ariadne-1 homolog; Short=ARI-1; AltName: Full=UbcH7-binding	1	4	4	4	1	0	1	4	4	4	1	0	1	4	4	4	1	0	1	4	4	4	11.1	11.1	11.1	64.117	557	557	2.1	1	16	3		0	By matching	By matching	By matching	By MS/MS	By MS/MS	By MS/MS	2	0	2.5	11.1
gi|20532383|sp|P46736.2|BRCC3_HUMAN	gi|20532383|sp|P46736.2|BRCC3_HUMAN	3	3	3	>gi|20532383|sp|P46736.2|BRCC3_HUMAN RecName: Full=Lys-63-specific deubiquitinase BRCC36; AltName: Full=BRCA1-A complex subunit BRCC36; AltName: Full=BRCA1/BRCA2-containing complex subunit 3; AltName: Full=BRCA1/BRCA2-containing complex subunit 36; AltName	1	3	3	3	0	0	0	2	2	2	0	0	0	2	2	2	0	0	0	2	2	2	12.7	12.7	12.7	36.072	316	316	1.29	6		1		0	By matching	By matching	By matching	By MS/MS	By MS/MS	By MS/MS	0	0	0	9.5
gi|20532389|sp|Q9NY33.2|DPP3_HUMAN	gi|20532389|sp|Q9NY33.2|DPP3_HUMAN	1	1	1	>gi|20532389|sp|Q9NY33.2|DPP3_HUMAN RecName: Full=Dipeptidyl peptidase 3; AltName: Full=Dipeptidyl aminopeptidase III; AltName: Full=Dipeptidyl arylamidase III; AltName: Full=Dipeptidyl peptidase III; Short=DPP III; AltName: Full=Enkephalinase B	1	1	1	1	0	0	0	1	0	0	0	0	0	1	0	0	0	0	0	1	0	0	2.3	2.3	2.3	82.588	737	737	2		1			0.0057613	By matching	By matching	By matching	By MS/MS	By matching	By matching	0	0	0	2.3
gi|20532400|sp|P38919.4|IF4A3_HUMAN	gi|20532400|sp|P38919.4|IF4A3_HUMAN	7	6	6	>gi|20532400|sp|P38919.4|IF4A3_HUMAN RecName: Full=Eukaryotic initiation factor 4A-III; Short=eIF-4A-III; Short=eIF4A-III; AltName: Full=ATP-dependent RNA helicase DDX48; AltName: Full=ATP-dependent RNA helicase eIF4A-3; AltName: Full=DEAD box protein 48;	1	7	6	6	2	2	3	5	4	5	1	1	2	4	3	4	1	1	2	4	3	4	22.1	18.2	18.2	46.871	411	411	2.67	2	14	2	9	0	By matching	By matching	By MS/MS	By MS/MS	By MS/MS	By MS/MS	5.8	5.8	9	15.3
gi|20532405|sp|O43242.2|PSMD3_HUMAN	gi|20532405|sp|O43242.2|PSMD3_HUMAN	11	11	11	>gi|20532405|sp|O43242.2|PSMD3_HUMAN RecName: Full=26S proteasome non-ATPase regulatory subunit 3; AltName: Full=26S proteasome regulatory subunit RPN3; AltName: Full=26S proteasome regulatory subunit S3; AltName: Full=Proteasome subunit p58	1	11	11	11	4	2	3	11	11	11	4	2	3	11	11	11	4	2	3	11	11	11	29.8	29.8	29.8	60.977	534	534	2.16	1	46	10		0	By matching	By matching	By MS/MS	By MS/MS	By MS/MS	By MS/MS	9.4	9.9	7.1	29.8
gi|20532406|sp|P17980.3|PRS6A_HUMAN	gi|20532406|sp|P17980.3|PRS6A_HUMAN	20	20	20	>gi|20532406|sp|P17980.3|PRS6A_HUMAN RecName: Full=26S protease regulatory subunit 6A; AltName: Full=26S proteasome AAA-ATPase subunit RPT5; AltName: Full=Proteasome 26S subunit ATPase 3; AltName: Full=Proteasome subunit P50; AltName: Full=Tat-binding prot	1	20	20	20	3	0	0	19	19	18	3	0	0	19	19	18	3	0	0	19	19	18	51.9	51.9	51.9	49.203	439	439	3.25	1	40	10	73	0	By matching	By matching	By matching	By MS/MS	By MS/MS	By MS/MS	11.2	0	0	49.2
gi|20532407|sp|P28072.4|PSB6_HUMAN	gi|20532407|sp|P28072.4|PSB6_HUMAN	3	3	3	>gi|20532407|sp|P28072.4|PSB6_HUMAN RecName: Full=Proteasome subunit beta type-6; AltName: Full=Macropain delta chain; AltName: Full=Multicatalytic endopeptidase complex delta chain; AltName: Full=Proteasome delta chain; AltName: Full=Proteasome subunit Y;	1	3	3	3	0	1	0	3	3	3	0	1	0	3	3	3	0	1	0	3	3	3	13.4	13.4	13.4	25.357	239	239	1.07	13	1			0	By matching	By MS/MS	By matching	By MS/MS	By MS/MS	By MS/MS	0	4.6	0	13.4
gi|20532409|sp|P43686.2|PRS6B_HUMAN	gi|20532409|sp|P43686.2|PRS6B_HUMAN	15	15	15	>gi|20532409|sp|P43686.2|PRS6B_HUMAN RecName: Full=26S protease regulatory subunit 6B; AltName: Full=26S proteasome AAA-ATPase subunit RPT3; AltName: Full=MB67-interacting protein; AltName: Full=MIP224; AltName: Full=Proteasome 26S subunit ATPase 4; AltNam	1	15	15	15	2	2	0	14	13	13	2	2	0	14	13	13	2	2	0	14	13	13	58.1	58.1	58.1	47.366	418	418	3.07	2	34	6	44	0	By matching	By matching	By matching	By MS/MS	By MS/MS	By MS/MS	6.7	5	0	55.5
gi|20532411|sp|P49720.2|PSB3_HUMAN	gi|20532411|sp|P49720.2|PSB3_HUMAN	4	4	4	>gi|20532411|sp|P49720.2|PSB3_HUMAN RecName: Full=Proteasome subunit beta type-3; AltName: Full=Proteasome chain 13; AltName: Full=Proteasome component C10-II; AltName: Full=Proteasome theta chain	1	4	4	4	0	0	0	4	4	4	0	0	0	4	4	4	0	0	0	4	4	4	30.2	30.2	30.2	22.949	205	205	2.09	13	1	1	7	0	By matching	By matching	By matching	By MS/MS	By MS/MS	By MS/MS	0	0	0	30.2
gi|20532412|sp|P51665.2|PSMD7_HUMAN	gi|20532412|sp|P51665.2|PSMD7_HUMAN	2	2	2	>gi|20532412|sp|P51665.2|PSMD7_HUMAN RecName: Full=26S proteasome non-ATPase regulatory subunit 7; AltName: Full=26S proteasome regulatory subunit RPN8; AltName: Full=26S proteasome regulatory subunit S12; AltName: Full=Mov34 protein homolog; AltName: Full	1	2	2	2	0	0	0	1	2	1	0	0	0	1	2	1	0	0	0	1	2	1	8.6	8.6	8.6	37.025	324	324	2.12		7	1		0	By matching	By matching	By matching	By MS/MS	By MS/MS	By matching	0	0	0	4
gi|20532417|sp|Q04726.2|TLE3_HUMAN	gi|20532417|sp|Q04726.2|TLE3_HUMAN	3	3	3	>gi|20532417|sp|Q04726.2|TLE3_HUMAN RecName: Full=Transducin-like enhancer protein 3; AltName: Full=Enhancer of split groucho-like protein 3; Short=ESG3	1	3	3	3	0	0	0	3	3	3	0	0	0	3	3	3	0	0	0	3	3	3	6.3	6.3	6.3	83.416	772	772	2.25		9	3		0	By matching	By matching	By matching	By MS/MS	By MS/MS	By MS/MS	0	0	0	6.3
gi|205371746|sp|P53621.2|COPA_HUMAN	gi|205371746|sp|P53621.2|COPA_HUMAN	25	25	25	>gi|205371746|sp|P53621.2|COPA_HUMAN RecName: Full=Coatomer subunit alpha; AltName: Full=Alpha-coat protein; Short=Alpha-COP; AltName: Full=HEP-COP; Short=HEPCOP; Contains: RecName: Full=Xenin; AltName: Full=Xenopsin-related peptide; Contains: RecName: Ful	1	25	25	25	3	3	0	21	24	23	3	3	0	21	24	23	3	3	0	21	24	23	24.6	24.6	24.6	138.34	1224	1224	2.94		5	82		0	By MS/MS	By matching	By matching	By MS/MS	By MS/MS	By MS/MS	3.1	2.6	0	19.9
gi|205371761|sp|P23588.2|IF4B_HUMAN	gi|205371761|sp|P23588.2|IF4B_HUMAN	3	3	3	>gi|205371761|sp|P23588.2|IF4B_HUMAN RecName: Full=Eukaryotic translation initiation factor 4B; Short=eIF-4B	1	3	3	3	0	0	0	3	2	2	0	0	0	3	2	2	0	0	0	3	2	2	7	7	7	69.15	611	611	2.4		9	6		0	By matching	By matching	By matching	By MS/MS	By MS/MS	By MS/MS	0	0	0	7
gi|205371766|sp|Q13164.2|MK07_HUMAN	gi|205371766|sp|Q13164.2|MK07_HUMAN	2	2	2	>gi|205371766|sp|Q13164.2|MK07_HUMAN RecName: Full=Mitogen-activated protein kinase 7; Short=MAP kinase 7; Short=MAPK 7; AltName: Full=Big MAP kinase 1; Short=BMK-1; AltName: Full=Extracellular signal-regulated kinase 5; Short=ERK-5	1	2	2	2	0	0	0	0	1	1	0	0	0	0	1	1	0	0	0	0	1	1	5.4	5.4	5.4	88.385	816	816	3			2		0	By matching	By matching	By matching	By matching	By MS/MS	By MS/MS	0	0	0	0
gi|205371776|sp|Q05655.2|KPCD_HUMAN	gi|205371776|sp|Q05655.2|KPCD_HUMAN	2	2	2	>gi|205371776|sp|Q05655.2|KPCD_HUMAN RecName: Full=Protein kinase C delta type; AltName: Full=Tyrosine-protein kinase PRKCD; AltName: Full=nPKC-delta; Contains: RecName: Full=Protein kinase C delta type regulatory subunit; Contains: RecName: Full=Protein k	1	2	2	2	0	0	0	2	1	2	0	0	0	2	1	2	0	0	0	2	1	2	3.7	3.7	3.7	77.504	676	676	2		5			0	By matching	By matching	By matching	By MS/MS	By MS/MS	By MS/MS	0	0	0	3.7
gi|205371866|sp|P14923.3|PLAK_HUMAN	gi|205371866|sp|P14923.3|PLAK_HUMAN	21	21	20	>gi|205371866|sp|P14923.3|PLAK_HUMAN RecName: Full=Junction plakoglobin; AltName: Full=Catenin gamma; AltName: Full=Desmoplakin III; AltName: Full=Desmoplakin-3	1	21	21	20	10	9	17	8	9	14	10	9	17	8	9	14	10	8	16	8	8	13	43.8	43.8	42.4	81.744	745	745	2.12	60	22	34	21	0	By MS/MS	By MS/MS	By MS/MS	By MS/MS	By MS/MS	By MS/MS	16.8	15	34.5	15.4
gi|205696378|sp|Q7Z392.2|TPC11_HUMAN	gi|205696378|sp|Q7Z392.2|TPC11_HUMAN	1	1	1	>gi|205696378|sp|Q7Z392.2|TPC11_HUMAN RecName: Full=Trafficking protein particle complex subunit 11	1	1	1	1	0	1	0	0	1	0	0	1	0	0	1	0	0	1	0	0	1	0	1.1	1.1	1.1	128.88	1133	1133	1.75	2	1	1		0.00044111	By matching	By matching	By matching	By matching	By MS/MS	By matching	0	1.1	0	0
gi|205815553|sp|Q9P0J7.2|KCMF1_HUMAN	gi|205815553|sp|Q9P0J7.2|KCMF1_HUMAN	1	1	1	>gi|205815553|sp|Q9P0J7.2|KCMF1_HUMAN RecName: Full=E3 ubiquitin-protein ligase KCMF1; AltName: Full=FGF-induced in gastric cancer; AltName: Full=Potassium channel modulatory factor; Short=PCMF; AltName: Full=ZZ-type zinc finger-containing protein 1	1	1	1	1	0	0	0	0	1	0	0	0	0	0	1	0	0	0	0	0	1	0	4.5	4.5	4.5	41.945	381	381	4				1	1	By matching	By matching	By matching	By matching	By MS/MS	By matching	0	0	0	0
gi|205829288|sp|A2A3N6.1|PIPSL_HUMAN	gi|205829288|sp|A2A3N6.1|PIPSL_HUMAN	2	1	0	>gi|205829288|sp|A2A3N6.1|PIPSL_HUMAN PUTATIVE PSEUDOGENE: RecName: Full=Putative PIP5K1A and PSMD4-like protein; Short=PIP5K1A-PSMD4	1	2	1	0	1	0	0	2	2	2	0	0	0	1	1	1	0	0	0	0	0	0	3.7	1.7	0	95.047	862	862	2		3			0.0017109	By matching	By matching	By matching	By MS/MS	By matching	By matching	2	0	0	3.7
gi|205829393|sp|Q5R372.1|RBG1L_HUMAN	gi|205829393|sp|Q5R372.1|RBG1L_HUMAN	2	2	2	>gi|205829393|sp|Q5R372.1|RBG1L_HUMAN RecName: Full=Rab GTPase-activating protein 1-like	1	2	2	2	0	0	0	2	2	2	0	0	0	2	2	2	0	0	0	2	2	2	3.1	3.1	3.1	92.512	815	815	3.14			6	1	0	By matching	By matching	By matching	By MS/MS	By MS/MS	By MS/MS	0	0	0	3.1
gi|205830834|sp|Q7Z6J0.2|SH3R1_HUMAN	gi|205830834|sp|Q7Z6J0.2|SH3R1_HUMAN	1	1	1	>gi|205830834|sp|Q7Z6J0.2|SH3R1_HUMAN RecName: Full=E3 ubiquitin-protein ligase SH3RF1; AltName: Full=Plenty of SH3s; Short=Protein POSH; AltName: Full=RING finger protein 142; AltName: Full=SH3 domain-containing RING finger protein 1; AltName: Full=SH3 mu	1	1	1	1	0	0	0	1	1	0	0	0	0	1	1	0	0	0	0	1	1	0	1.8	1.8	1.8	93.128	888	888	3			2		1	By matching	By matching	By matching	By matching	By MS/MS	By matching	0	0	0	1.8
gi|205830906|sp|Q92974.4|ARHG2_HUMAN	gi|205830906|sp|Q92974.4|ARHG2_HUMAN	5	5	5	>gi|205830906|sp|Q92974.4|ARHG2_HUMAN RecName: Full=Rho guanine nucleotide exchange factor 2; AltName: Full=Guanine nucleotide exchange factor H1; Short=GEF-H1; AltName: Full=Microtubule-regulated Rho-GEF; AltName: Full=Proliferating cell nucleolar antigen	1	5	5	5	0	2	1	4	5	4	0	2	1	4	5	4	0	2	1	4	5	4	5.6	5.6	5.6	111.54	986	986	3			16		0	By matching	By matching	By matching	By MS/MS	By MS/MS	By MS/MS	0	3.2	1.2	5.6
gi|206558286|sp|A6NKD9.1|CC85C_HUMAN	gi|206558286|sp|A6NKD9.1|CC85C_HUMAN	1	1	1	>gi|206558286|sp|A6NKD9.1|CC85C_HUMAN RecName: Full=Coiled-coil domain-containing protein 85C	1	1	1	1	1	0	0	1	1	0	1	0	0	1	1	0	1	0	0	1	1	0	5.3	5.3	5.3	45.209	419	419	4				3	0.0076061	By matching	By matching	By matching	By MS/MS	By matching	By matching	5.3	0	0	5.3
gi|206729858|sp|O75746.2|CMC1_HUMAN	gi|206729858|sp|O75746.2|CMC1_HUMAN	9	6	6	>gi|206729858|sp|O75746.2|CMC1_HUMAN RecName: Full=Calcium-binding mitochondrial carrier protein Aralar1; AltName: Full=Mitochondrial aspartate glutamate carrier 1; AltName: Full=Solute carrier family 25 member 12	1	9	6	6	0	1	0	9	9	9	0	0	0	6	6	6	0	0	0	6	6	6	17.6	13.3	13.3	74.761	678	678	2		18			0	By matching	By matching	By matching	By MS/MS	By MS/MS	By MS/MS	0	1.8	0	17.6
gi|206729891|sp|P49790.2|NU153_HUMAN	gi|206729891|sp|P49790.2|NU153_HUMAN	3	3	3	>gi|206729891|sp|P49790.2|NU153_HUMAN RecName: Full=Nuclear pore complex protein Nup153; AltName: Full=153 kDa nucleoporin; AltName: Full=Nucleoporin Nup153	1	3	3	3	0	0	0	3	3	3	0	0	0	3	3	3	0	0	0	3	3	3	2.8	2.8	2.8	153.94	1475	1475	3			9		0	By matching	By matching	By matching	By matching	By MS/MS	By matching	0	0	0	2.8
gi|206729892|sp|O14802.2|RPC1_HUMAN	gi|206729892|sp|O14802.2|RPC1_HUMAN	1	1	1	>gi|206729892|sp|O14802.2|RPC1_HUMAN RecName: Full=DNA-directed RNA polymerase III subunit RPC1; Short=RNA polymerase III subunit C1; AltName: Full=DNA-directed RNA polymerase III largest subunit; AltName: Full=DNA-directed RNA polymerase III subunit A; Al	1	1	1	1	0	0	0	1	0	1	0	0	0	1	0	1	0	0	0	1	0	1	1.1	1.1	1.1	155.64	1390	1390	3			2		0	By matching	By matching	By matching	By MS/MS	By matching	By MS/MS	0	0	0	1.1
gi|206729898|sp|O00186.2|STXB3_HUMAN	gi|206729898|sp|O00186.2|STXB3_HUMAN	4	4	4	>gi|206729898|sp|O00186.2|STXB3_HUMAN RecName: Full=Syntaxin-binding protein 3; AltName: Full=Platelet Sec1 protein; Short=PSP; AltName: Full=Protein unc-18 homolog 3; Short=Unc18-3; AltName: Full=Protein unc-18 homolog C; Short=Unc-18C	1	4	4	4	0	0	0	4	4	2	0	0	0	4	4	2	0	0	0	4	4	2	8.6	8.6	8.6	67.764	592	592	2		11			0	By matching	By matching	By matching	By MS/MS	By MS/MS	By matching	0	0	0	8.6
gi|206729908|sp|O14828.3|SCAM3_HUMAN	gi|206729908|sp|O14828.3|SCAM3_HUMAN	2	2	2	>gi|206729908|sp|O14828.3|SCAM3_HUMAN RecName: Full=Secretory carrier-associated membrane protein 3; Short=Secretory carrier membrane protein 3	1	2	2	2	0	0	0	2	1	1	0	0	0	2	1	1	0	0	0	2	1	1	10.4	10.4	10.4	38.287	347	347	1.3	7	3			0	By matching	By matching	By matching	By MS/MS	By MS/MS	By MS/MS	0	0	0	10.4
gi|206729919|sp|O00221.3|IKBE_HUMAN	gi|206729919|sp|O00221.3|IKBE_HUMAN	1	1	1	>gi|206729919|sp|O00221.3|IKBE_HUMAN RecName: Full=NF-kappa-B inhibitor epsilon; Short=NF-kappa-BIE; AltName: Full=I-kappa-B-epsilon; Short=IkB-E; Short=IkB-epsilon; Short=IkappaBepsilon	1	1	1	1	0	0	0	0	0	1	0	0	0	0	0	1	0	0	0	0	0	1	3.8	3.8	3.8	52.863	500	500	2		1			0	By matching	By matching	By matching	By matching	By matching	By MS/MS	0	0	0	0
[truncated: 1,713 more rows]
[truncated: 41 more columns]
