# Supplementary material for: A genome-wide screen for human salicylic acid (SA)-binding proteins reveals targets through which SA may influence development of various diseases
Source: Sci Rep. 2019 Sep 11;9:13084. doi: 10.1038/s41598-019-49234-6 (PMC6739329; doi:10.1038/s41598-019-49234-6)
Supplement: Supplementary file 2 — Supplementary Table S2 [file 41598_2019_49234_MOESM2_ESM.xlsx]

## Sheet: S2
Supplementary Table S2. Number of proteins identified in the screen by Nano-HPLC–MS/MS analyses.
UV	Experiment No.	Number of proteins
treated (+UV)	1	2430
	2	2459
	3	2435
untreated (-UV)	1	697
	2	698
	3	808
