# Supplementary material for: A genome-wide screen for human salicylic acid (SA)-binding proteins reveals targets through which SA may influence development of various diseases
Source: Sci Rep. 2019 Sep 11;9:13084. doi: 10.1038/s41598-019-49234-6 (PMC6739329; doi:10.1038/s41598-019-49234-6)
Supplement: Supplementary file 3 — Supplementary Table S3 [file 41598_2019_49234_MOESM3_ESM.xlsx]

## Sheet: S3
Supplementary Table S3. List of the 95 cSABPs ranked based on level of enrichment.
Protein_ID	logFC	logCPM	PValue	FDR	Entry name	Protein names	Gene names	Mass
P06733	11.5136	12.079	1.26e-36	9.74e-34	ENOA_HUMAN	Alpha-enolase (EC 4.2.1.11) (2-phospho-D-glycerate hydro-lyase) (C-myc promoter-binding protein) (Enolase 1) (MBP-1) (MPB-1) (Non-neural enolase) (NNE) (Phosphopyruvate hydratase) (Plasminogen-binding protein)	ENO1 ENO1L1 MBPB1 MPB1	47,169
P14618	10.9365	12.7484	5.22e-37	6.06e-34	KPYM_HUMAN	Pyruvate kinase PKM (EC 2.7.1.40) (Cytosolic thyroid hormone-binding protein) (CTHBP) (Opa-interacting protein 3) (OIP-3) (Pyruvate kinase 2/3) (Pyruvate kinase muscle isozyme) (Thyroid hormone-binding protein 1) (THBP1) (Tumor M2-PK) (p58)	PKM OIP3 PK2 PK3 PKM2	57,937
P12814	9.87385	9.86998	1.35e-22	3.13e-20	ACTN1_HUMAN	Alpha-actinin-1 (Alpha-actinin cytoskeletal isoform) (F-actin cross-linking protein) (Non-muscle alpha-actinin-1)	ACTN1	103,058
O75369	8.34498	8.42948	7.13e-23	2.07e-20	FLNB_HUMAN	Filamin-B (FLN-B) (ABP-278) (ABP-280 homolog) (Actin-binding-like protein) (Beta-filamin) (Filamin homolog 1) (Fh1) (Filamin-3) (Thyroid autoantigen) (Truncated actin-binding protein) (Truncated ABP)	FLNB FLN1L FLN3 TABP TAP	278,164
Q07954	8.22654	5.50095	5.11e-07	7.76e-06	LRP1_HUMAN	Prolow-density lipoprotein receptor-related protein 1 (LRP-1) (Alpha-2-macroglobulin receptor) (A2MR) (Apolipoprotein E receptor) (APOER) (CD antigen CD91) [Cleaved into: Low-density lipoprotein receptor-related protein 1 85 kDa subunit (LRP-85); Low-density lipoprotein receptor-related protein 1 515 kDa subunit (LRP-515); Low-density lipoprotein receptor-related protein 1 intracellular domain (L…	LRP1 A2MR APR	504,606
Q96EP0	7.0476	6.05838	1.07e-08	2.32e-07	RNF31_HUMAN	E3 ubiquitin-protein ligase RNF31 (EC 2.3.2.27) (HOIL-1-interacting protein) (HOIP) (RING finger protein 31) (RING-type E3 ubiquitin transferase RNF31) (Zinc in-between-RING-finger ubiquitin-associated domain protein)	HOIP RNF31 ZIBRA	119,652
Q13596	6.89101	5.72314	1.6e-08	3.34e-07	SNX1_HUMAN	Sorting nexin-1	SNX1	59,070
Q16891	6.85493	7.97981	3.16e-19	4.07e-17	MIC60_HUMAN	MICOS complex subunit MIC60 (Cell proliferation-inducing gene 4/52 protein) (Mitochondrial inner membrane protein) (Mitofilin) (p87/89)	IMMT HMP MIC60 MINOS2 PIG4 PIG52	83,678
Q12906	6.7626	8.58516	4.65e-16	3.85e-14	ILF3_HUMAN	Interleukin enhancer-binding factor 3 (Double-stranded RNA-binding protein 76) (DRBP76) (M-phase phosphoprotein 4) (MPP4) (Nuclear factor associated with dsRNA) (NFAR) (Nuclear factor of activated T-cells 90 kDa) (NF-AT-90) (Translational control protein 80) (TCP80)	ILF3 DRBF MPHOSPH4 NF90	95,338
P17066	6.75942	9.0363	6.14e-24	2.04e-21	HSP76_HUMAN	Heat shock 70 kDa protein 6 (Heat shock 70 kDa protein B')	HSPA6 HSP70B'	71,028
Q9BQS8	6.75794	6.48677	2.16e-08	4.46e-07	FYCO1_HUMAN	FYVE and coiled-coil domain-containing protein 1 (Zinc finger FYVE domain-containing protein 7)	FYCO1 ZFYVE7	166,983
Q86V85	6.67089	4.25225	0.000106887	0.000853	GP180_HUMAN	Integral membrane protein GPR180 (Intimal thickness-related receptor)	GPR180 ITR	49,395
Q8TDY2	6.61667	4.61932	4.64e-05	0.000408204	RBCC1_HUMAN	RB1-inducible coiled-coil protein 1 (FAK family kinase-interacting protein of 200 kDa) (FIP200)	RB1CC1 KIAA0203 RBICC	183,091
P57088	6.23343	5.78354	5.52e-08	1.03e-06	TMM33_HUMAN	Transmembrane protein 33 (Protein DB83) (SHINC-3)	TMEM33 DB83	27,978
Q13371	6.21735	6.14937	3.63e-07	5.62e-06	PHLP_HUMAN	Phosducin-like protein (PHLP)	PDCL PHLOP1 PhLP1	34,282
P43243	6.05224	6.24947	4.92e-08	9.21e-07	MATR3_HUMAN	Matrin-3	MATR3 KIAA0723	94,623
Q9Y6A5	5.95662	9.1747	4.45e-14	2.72e-12	TACC3_HUMAN	Transforming acidic coiled-coil-containing protein 3 (ERIC-1)	TACC3 ERIC1	90,360
P61978	5.9104	11.6632	5.42e-20	8.39e-18	HNRPK_HUMAN	Heterogeneous nuclear ribonucleoprotein K (hnRNP K) (Transformation up-regulated nuclear protein) (TUNP)	HNRNPK HNRPK	50,976
Q04637	5.90109	6.84307	9e-10	2.37e-08	IF4G1_HUMAN	Eukaryotic translation initiation factor 4 gamma 1 (eIF-4-gamma 1) (eIF-4G 1) (eIF-4G1) (p220)	EIF4G1 EIF4F EIF4G EIF4GI	175,491
Q15637	5.81816	7.60224	2.07e-12	9.24e-11	SF01_HUMAN	Splicing factor 1 (Mammalian branch point-binding protein) (BBP) (mBBP) (Transcription factor ZFM1) (Zinc finger gene in MEN1 locus) (Zinc finger protein 162)	SF1 ZFM1 ZNF162	68,330
Q96CV9	5.73972	4.71718	9.52e-05	0.000775903	OPTN_HUMAN	Optineurin (E3-14.7K-interacting protein) (FIP-2) (Huntingtin yeast partner L) (Huntingtin-interacting protein 7) (HIP-7) (Huntingtin-interacting protein L) (NEMO-related protein) (Optic neuropathy-inducing protein) (Transcription factor IIIA-interacting protein) (TFIIIA-IntP)	OPTN FIP2 GLC1E HIP7 HYPL NRP	65,921
Q9H4A4	5.54503	7.74558	5.24e-10	1.48e-08	AMPB_HUMAN	Aminopeptidase B (AP-B) (EC 3.4.11.6) (Arginine aminopeptidase) (Arginyl aminopeptidase)	RNPEP APB	72,596
Q96AE4	5.43028	7.78872	1.34e-12	6.34e-11	FUBP1_HUMAN	Far upstream element-binding protein 1 (FBP) (FUSE-binding protein 1) (DNA helicase V) (hDH V)	FUBP1	67,560
Q9NYZ3	5.42515	4.24663	0.00241953	0.0121605	GTSE1_HUMAN	G2 and S phase-expressed protein 1 (GTSE-1) (Protein B99 homolog)	GTSE1	76,645
O43390	5.38748	6.96286	1.91e-09	4.67e-08	HNRPR_HUMAN	Heterogeneous nuclear ribonucleoprotein R (hnRNP R)	HNRNPR HNRPR	70,943
Q6PJ69	5.37008	6.95898	1.24e-09	3.16e-08	TRI65_HUMAN	Tripartite motif-containing protein 65	TRIM65	57,353
Q13813	5.36195	5.86775	5.52e-07	8.33e-06	SPTN1_HUMAN	Spectrin alpha chain, non-erythrocytic 1 (Alpha-II spectrin) (Fodrin alpha chain) (Spectrin, non-erythroid alpha subunit)	SPTAN1 NEAS SPTA2	284,539
Q9NQX3	5.35986	9.38239	2.99e-18	3.31e-16	GEPH_HUMAN	Gephyrin [Includes: Molybdopterin adenylyltransferase (MPT adenylyltransferase) (EC 2.7.7.75) (Domain G); Molybdopterin molybdenumtransferase (MPT Mo-transferase) (EC 2.10.1.1) (Domain E)]	GPHN GPH KIAA1385	79,748
Q96S55	5.30035	9.33712	1.15e-19	1.66e-17	WRIP1_HUMAN	ATPase WRNIP1 (EC 3.6.1.3) (Werner helicase-interacting protein 1)	WRNIP1 WHIP	72,133
Q8NEZ5	5.27794	9.12733	1.28e-16	1.1e-14	FBX22_HUMAN	F-box only protein 22 (F-box protein FBX22p44)	FBXO22 FBX22	44,508
P20810	5.2707	5.43294	0.000345446	0.0023454	ICAL_HUMAN	Calpastatin (Calpain inhibitor) (Sperm BS-17 component)	CAST	76,573
O60343	4.92373	7.62403	1.32e-10	4.43e-09	TBCD4_HUMAN	TBC1 domain family member 4 (Akt substrate of 160 kDa) (AS160)	TBC1D4 AS160 KIAA0603	146,563
P05165	4.84052	5.70845	0.000676274	0.00407873	PCCA_HUMAN	Propionyl-CoA carboxylase alpha chain, mitochondrial (PCCase subunit alpha) (EC 6.4.1.3) (Propanoyl-CoA:carbon dioxide ligase subunit alpha)	PCCA	80,059
Q8NFP9	4.83965	2.33507	0.00720837	0.0299961	NBEA_HUMAN	Neurobeachin (Lysosomal-trafficking regulator 2) (Protein BCL8B)	NBEA BCL8B KIAA1544 LYST2	327,822
Q8TD19	4.7966	8.92174	3.61e-15	2.71e-13	NEK9_HUMAN	Serine/threonine-protein kinase Nek9 (EC 2.7.11.1) (Nercc1 kinase) (Never in mitosis A-related kinase 9) (NimA-related protein kinase 9) (NimA-related kinase 8) (Nek8)	NEK9 KIAA1995 NEK8 NERCC	107,168
Q13428	4.64795	6.48466	1.59e-06	2.18e-05	TCOF_HUMAN	Treacle protein (Treacher Collins syndrome protein)	TCOF1	152,106
P55196	4.62158	3.80931	0.00375881	0.0175057	AFAD_HUMAN	Afadin (ALL1-fused gene from chromosome 6 protein) (Protein AF-6) (Afadin adherens junction formation factor)	AFDN AF6 MLLT4	206,804
P23378	4.61518	7.62559	1.34e-09	3.35e-08	GCSP_HUMAN	Glycine dehydrogenase (decarboxylating), mitochondrial (EC 1.4.4.2) (Glycine cleavage system P protein) (Glycine decarboxylase) (Glycine dehydrogenase (aminomethyl-transferring))	GLDC GCSP	112,730
Q3SY69	4.60181	6.65753	1.66e-06	2.26e-05	AL1L2_HUMAN	Mitochondrial 10-formyltetrahydrofolate dehydrogenase (Mitochondrial 10-FTHFDH) (mtFDH) (EC 1.5.1.6) (Aldehyde dehydrogenase family 1 member L2)	ALDH1L2	101,746
Q96RG2	4.58581	4.18969	0.00378513	0.0175781	PASK_HUMAN	PAS domain-containing serine/threonine-protein kinase (PAS-kinase) (PASKIN) (hPASK) (EC 2.7.11.1)	PASK KIAA0135	142,929
Q12756	4.52178	6.13287	1.12e-05	0.000124976	KIF1A_HUMAN	Kinesin-like protein KIF1A (Axonal transporter of synaptic vesicles) (Microtubule-based motor KIF1A) (Unc-104- and KIF1A-related protein) (hUnc-104)	KIF1A ATSV C2orf20	191,064
Q9NRW1	4.50376	7.12367	9.31e-08	1.65e-06	RAB6B_HUMAN	Ras-related protein Rab-6B	RAB6B	23,462
Q4V328	4.47798	8.04924	1.6e-10	5.31e-09	GRAP1_HUMAN	GRIP1-associated protein 1 (GRASP-1) [Cleaved into: GRASP-1 C-terminal chain (30kDa C-terminus form)]	GRIPAP1 KIAA1167	95,990
Q15276	4.47655	7.8284	1.63e-10	5.34e-09	RABE1_HUMAN	Rab GTPase-binding effector protein 1 (Rabaptin-4) (Rabaptin-5) (Rabaptin-5alpha) (Renal carcinoma antigen NY-REN-17)	RABEP1 RAB5EP RABPT5 RABPT5A	99,290
O75044	4.44176	5.84884	2.77e-05	0.000266806	SRGP2_HUMAN	SLIT-ROBO Rho GTPase-activating protein 2 (srGAP2) (Formin-binding protein 2) (Rho GTPase-activating protein 34)	SRGAP2 ARHGAP34 FNBP2 KIAA0456 SRGAP2A	120,871
Q8IWS0	4.43945	5.33435	0.000225828	0.00161191	PHF6_HUMAN	PHD finger protein 6 (PHD-like zinc finger protein)	PHF6 CENP-31 KIAA1823	41,290
Q9Y6X4	4.435	6.79234	7.36e-07	1.08e-05	F169A_HUMAN	Soluble lamin-associated protein of 75 kDa (SLAP75) (Protein FAM169A)	FAM169A KIAA0888	74,955
Q7Z3T8	4.41497	6.02574	1.41e-05	0.000150526	ZFY16_HUMAN	Zinc finger FYVE domain-containing protein 16 (Endofin) (Endosome-associated FYVE domain protein)	ZFYVE16 KIAA0305	168,903
P52732	4.40293	8.89805	8.69e-14	5.05e-12	KIF11_HUMAN	Kinesin-like protein KIF11 (Kinesin-like protein 1) (Kinesin-like spindle protein HKSP) (Kinesin-related motor protein Eg5) (Thyroid receptor-interacting protein 5) (TR-interacting protein 5) (TRIP-5)	KIF11 EG5 KNSL1 TRIP5	119,159
Q32MZ4	4.37177	7.91455	6.48e-10	1.79e-08	LRRF1_HUMAN	Leucine-rich repeat flightless-interacting protein 1 (LRR FLII-interacting protein 1) (GC-binding factor 2) (TAR RNA-interacting protein)	LRRFIP1 GCF2 TRIP	89,253
Q8TEV9	4.33535	3.89592	0.00735086	0.0303713	SMCR8_HUMAN	Guanine nucleotide exchange protein SMCR8 (Smith-Magenis syndrome chromosomal region candidate gene 8 protein)	SMCR8	105,022
Q6VN20	4.31358	5.47838	0.000838061	0.00485281	RBP10_HUMAN	Ran-binding protein 10 (RanBP10)	RANBP10 KIAA1464	67,257
Q96EA4	4.29751	6.20168	3.14e-05	0.000295314	SPDLY_HUMAN	Protein Spindly (hSpindly) (Arsenite-related gene 1 protein) (Coiled-coil domain-containing protein 99) (Rhabdomyosarcoma antigen MU-RMS-40.4A) (Spindle apparatus coiled-coil domain-containing protein 1)	SPDL1 CCDC99	70,172
Q96BW5	4.29678	6.71179	4.14e-05	0.000371021	PTER_HUMAN	Phosphotriesterase-related protein (EC 3.1.-.-) (Parathion hydrolase-related protein) (hPHRP)	PTER	39,018
P30622	4.29152	6.80147	5.75e-06	6.74e-05	CLIP1_HUMAN	CAP-Gly domain-containing linker protein 1 (Cytoplasmic linker protein 1) (Cytoplasmic linker protein 170 alpha-2) (CLIP-170) (Reed-Sternberg intermediate filament-associated protein) (Restin)	CLIP-170 CLIP1 CYLN1 RSN	162,246
Q5VZ89	4.27506	3.15979	0.011843	0.044206	DEN4C_HUMAN	DENN domain-containing protein 4C	DENND4C C9orf55 C9orf55B	212,711
Q5JTZ9	4.20059	7.70186	2.08e-09	5.03e-08	SYAM_HUMAN	Alanine--tRNA ligase, mitochondrial (EC 6.1.1.7) (Alanyl-tRNA synthetase) (AlaRS)	AARS2 AARSL KIAA1270	107,340
Q96LA8	4.1926	4.91122	0.0044264	0.0200744	ANM6_HUMAN	Protein arginine N-methyltransferase 6 (EC 2.1.1.319) (Heterogeneous nuclear ribonucleoprotein methyltransferase-like protein 6) (Histone-arginine N-methyltransferase PRMT6)	PRMT6 HRMT1L6	41,938
Q92597	4.13489	9.02652	1.24e-12	6.01e-11	NDRG1_HUMAN	Protein NDRG1 (Differentiation-related gene 1 protein) (DRG-1) (N-myc downstream-regulated gene 1 protein) (Nickel-specific induction protein Cap43) (Reducing agents and tunicamycin-responsive protein) (RTP) (Rit42)	NDRG1 CAP43 DRG1 RTP	42,835
Q15942	4.12642	9.76692	8.36e-13	4.13e-11	ZYX_HUMAN	Zyxin (Zyxin-2)	ZYX	61,277
P51610	4.11364	5.52424	0.000272777	0.00191356	HCFC1_HUMAN	Host cell factor 1 (HCF) (HCF-1) (C1 factor) (CFF) (VCAF) (VP16 accessory protein) [Cleaved into: HCF N-terminal chain 1; HCF N-terminal chain 2; HCF N-terminal chain 3; HCF N-terminal chain 4; HCF N-terminal chain 5; HCF N-terminal chain 6; HCF C-terminal chain 1; HCF C-terminal chain 2; HCF C-terminal chain 3; HCF C-terminal chain 4; HCF C-terminal chain 5; HCF C-terminal chain 6]	HCFC1 HCF1 HFC1	208,732
Q7Z6Z7	4.08698	9.28148	2.88e-13	1.56e-11	HUWE1_HUMAN	E3 ubiquitin-protein ligase HUWE1 (EC 2.3.2.26) (ARF-binding protein 1) (ARF-BP1) (HECT, UBA and WWE domain-containing protein 1) (HECT-type E3 ubiquitin transferase HUWE1) (Homologous to E6AP carboxyl terminus homologous protein 9) (HectH9) (Large structure of UREB1) (LASU1) (Mcl-1 ubiquitin ligase E3) (Mule) (Upstream regulatory element-binding protein 1) (URE-B1) (URE-binding protein 1)	HUWE1 KIAA0312 KIAA1578 UREB1 HSPC272	481,891
Q08379	4.06468	6.00594	0.000208515	0.00150364	GOGA2_HUMAN	Golgin subfamily A member 2 (130 kDa cis-Golgi matrix protein) (GM130) (GM130 autoantigen) (Golgin-95)	GOLGA2	113,086
Q8NFC6	4.02326	5.82954	6.93e-05	0.000589597	BD1L1_HUMAN	Biorientation of chromosomes in cell division protein 1-like 1	BOD1L1 BOD1L FAM44A KIAA1327	330,466
P41229	4.02224	4.51922	0.00718549	0.0299546	KDM5C_HUMAN	Lysine-specific demethylase 5C (EC 1.14.11.-) (Histone demethylase JARID1C) (Jumonji/ARID domain-containing protein 1C) (Protein SmcX) (Protein Xe169)	KDM5C DXS1272E JARID1C SMCX XE169	175,720
Q14315	4.01812	8.03991	4.97e-10	1.43e-08	FLNC_HUMAN	Filamin-C (FLN-C) (FLNc) (ABP-280-like protein) (ABP-L) (Actin-binding-like protein) (Filamin-2) (Gamma-filamin)	FLNC ABPL FLN2	291,022
O43852	3.97972	8.60259	8.37e-09	1.83e-07	CALU_HUMAN	Calumenin (Crocalbin) (IEF SSP 9302)	CALU	37,107
Q9NSV4	3.87342	4.41931	0.00722222	0.03	DIAP3_HUMAN	Protein diaphanous homolog 3 (Diaphanous-related formin-3) (DRF3) (MDia2)	DIAPH3 DIAP3	136,926
Q9Y6K9	3.84791	7.27256	1.13e-06	1.6e-05	NEMO_HUMAN	NF-kappa-B essential modulator (NEMO) (FIP-3) (IkB kinase-associated protein 1) (IKKAP1) (Inhibitor of nuclear factor kappa-B kinase subunit gamma) (I-kappa-B kinase subunit gamma) (IKK-gamma) (IKKG) (IkB kinase subunit gamma) (NF-kappa-B essential modifier)	IKBKG FIP3 NEMO	48,198
Q9Y5B0	3.83434	4.20113	0.0113304	0.0426405	CTDP1_HUMAN	RNA polymerase II subunit A C-terminal domain phosphatase (EC 3.1.3.16) (TFIIF-associating CTD phosphatase)	CTDP1 FCP1	104,399
Q13501	3.82688	7.65329	1.21e-06	1.7e-05	SQSTM_HUMAN	Sequestosome-1 (EBI3-associated protein of 60 kDa) (EBIAP) (p60) (Phosphotyrosine-independent ligand for the Lck SH2 domain of 62 kDa) (Ubiquitin-binding protein p62)	SQSTM1 ORCA OSIL	47,687
P51649	3.82399	8.6336	7.47e-10	1.99e-08	SSDH_HUMAN	Succinate-semialdehyde dehydrogenase, mitochondrial (EC 1.2.1.24) (Aldehyde dehydrogenase family 5 member A1) (NAD(+)-dependent succinic semialdehyde dehydrogenase)	ALDH5A1 SSADH	57,215
P20339	3.81592	6.57713	0.000414073	0.00275495	RAB5A_HUMAN	Ras-related protein Rab-5A	RAB5A RAB5	23,659
Q8IW35	3.79896	7.15786	1.9e-06	2.55e-05	CEP97_HUMAN	Centrosomal protein of 97 kDa (Cep97) (Leucine-rich repeat and IQ domain-containing protein 2)	CEP97 LRRIQ2	96,981
P46939	3.78013	5.68149	0.00021734	0.00156243	UTRO_HUMAN	Utrophin (Dystrophin-related protein 1) (DRP-1)	UTRN DMDL DRP1	394,466
P50570	3.77035	5.08526	0.00210428	0.0107624	DYN2_HUMAN	Dynamin-2 (EC 3.6.5.5)	DNM2 DYN2	98,064
Q5T6V5	3.73449	5.94581	0.000154442	0.00116318	QSPP_HUMAN	Queuosine salvage protein	C9orf64	39,029
P67936	3.68018	9.85199	1.29e-09	3.25e-08	TPM4_HUMAN	Tropomyosin alpha-4 chain (TM30p1) (Tropomyosin-4)	TPM4	28,522
Q00653	3.67924	4.56011	0.00902448	0.036129	NFKB2_HUMAN	Nuclear factor NF-kappa-B p100 subunit (DNA-binding factor KBF2) (H2TF1) (Lymphocyte translocation chromosome 10 protein) (Nuclear factor of kappa light polypeptide gene enhancer in B-cells 2) (Oncogene Lyt-10) (Lyt10) [Cleaved into: Nuclear factor NF-kappa-B p52 subunit]	NFKB2 LYT10	96,749
Q9BRP4	3.66329	6.41223	0.000156904	0.00117148	PAAF1_HUMAN	Proteasomal ATPase-associated factor 1 (Protein G-16) (WD repeat-containing protein 71)	PAAF1 WDR71	42,190
Q96P47	3.65732	5.47643	0.00120715	0.00656048	AGAP3_HUMAN	Arf-GAP with GTPase, ANK repeat and PH domain-containing protein 3 (AGAP-3) (CRAM-associated GTPase) (CRAG) (Centaurin-gamma-3) (Cnt-g3) (MR1-interacting protein) (MRIP-1)	AGAP3 CENTG3	95,044
P28161	3.61937	6.70298	0.000100562	0.000810779	GSTM2_HUMAN	Glutathione S-transferase Mu 2 (EC 2.5.1.18) (GST class-mu 2) (GSTM2-2)	GSTM2 GST4	25,745
Q9H5N1	3.61892	6.08209	0.000656912	0.00397227	RABE2_HUMAN	Rab GTPase-binding effector protein 2 (Rabaptin-5beta)	RABEP2 RABPT5B	63,543
Q53GG5	3.61056	6.10006	0.000319412	0.00219431	PDLI3_HUMAN	PDZ and LIM domain protein 3 (Actinin-associated LIM protein) (Alpha-actinin-2-associated LIM protein)	PDLIM3 ALP	39,232
Q8TD16	3.59124	6.0528	0.000611107	0.00376768	BICD2_HUMAN	Protein bicaudal D homolog 2 (Bic-D 2)	BICD2 KIAA0699	93,533
P22681	3.58202	5.75417	0.00104808	0.0058361	CBL_HUMAN	E3 ubiquitin-protein ligase CBL (EC 2.3.2.27) (Casitas B-lineage lymphoma proto-oncogene) (Proto-oncogene c-Cbl) (RING finger protein 55) (RING-type E3 ubiquitin transferase CBL) (Signal transduction protein CBL)	CBL CBL2 RNF55	99,633
Q8N573	3.57684	4.83609	0.00617532	0.0265172	OXR1_HUMAN	Oxidation resistance protein 1	OXR1 Nbla00307	97,970
Q13509	3.56999	8.23754	2.56e-06	3.18e-05	TBB3_HUMAN	Tubulin beta-3 chain (Tubulin beta-4 chain) (Tubulin beta-III)	TUBB3 TUBB4	50,433
Q9UJA5	3.56822	5.84958	0.000421225	0.00279453	TRM6_HUMAN	tRNA (adenine(58)-N(1))-methyltransferase non-catalytic subunit TRM6 (mRNA methyladenosine-N(1)-methyltransferase non-catalytic subunit TRM6) (tRNA(m1A58)-methyltransferase subunit TRM6) (tRNA(m1A58)MTase subunit TRM6)	TRMT6 KIAA1153 TRM6 CGI-09	55,799
Q96RU2	3.49503	5.16907	0.00256837	0.0128253	UBP28_HUMAN	Ubiquitin carboxyl-terminal hydrolase 28 (EC 3.4.19.12) (Deubiquitinating enzyme 28) (Ubiquitin thioesterase 28) (Ubiquitin-specific-processing protease 28)	USP28 KIAA1515	122,491
P02792	3.48652	8.76287	1.38e-08	2.98e-07	FRIL_HUMAN	Ferritin light chain (Ferritin L subunit)	FTL	20,020
Q9NSE4	3.45068	9.85857	2.13e-10	6.78e-09	SYIM_HUMAN	Isoleucine--tRNA ligase, mitochondrial (EC 6.1.1.5) (Isoleucyl-tRNA synthetase) (IleRS)	IARS2	113,792
P31327	3.38981	4.81103	0.00970726	0.0382687	CPSM_HUMAN	Carbamoyl-phosphate synthase [ammonia], mitochondrial (EC 6.3.4.16) (Carbamoyl-phosphate synthetase I) (CPSase I)	CPS1	164,939
P22061	3.33307	8.90271	2.51e-07	4.07e-06	PIMT_HUMAN	Protein-L-isoaspartate(D-aspartate) O-methyltransferase (PIMT) (EC 2.1.1.77) (L-isoaspartyl protein carboxyl methyltransferase) (Protein L-isoaspartyl/D-aspartyl methyltransferase) (Protein-beta-aspartate methyltransferase)	PCMT1	24,636
Q14847	3.32307	8.93965	8.16e-09	1.8e-07	LASP1_HUMAN	LIM and SH3 domain protein 1 (LASP-1) (Metastatic lymph node gene 50 protein) (MLN 50)	LASP1 MLN50	29,717
