# Supplementary material for: A genome-wide screen for human salicylic acid (SA)-binding proteins reveals targets through which SA may influence development of various diseases
Source: Sci Rep. 2019 Sep 11;9:13084. doi: 10.1038/s41598-019-49234-6 (PMC6739329; doi:10.1038/s41598-019-49234-6)
Supplement: Supplementary file 4 — Supplementary Table S4 [file 41598_2019_49234_MOESM4_ESM.xlsx]

## Sheet: S4
Supplementary Table S4. Pathways related with the 95 cSABPs.
Pathway identifier	Pathway name	#Entities found	#Entities total	Entities ratio	Entities pValue	Entities FDR	#Reactions found	#Reactions total	Reactions ratio	col1	Species identifier	Species name	Submitted entities found	Mapped entities	Found reaction identifiers
R-HSA-392499	Metabolism of proteins	17	2010	0.18035	0.593149	0.593149	62	873	0.0740081	4.39529	9606	Homo sapiens	P22061;Q13813;O43852;Q9NRW1;Q13509;Q08379;Q5JTZ9;Q8NEZ5;P51610;Q04637;Q00653;P20339;Q96RU2;Q9Y6K9;Q13371;P61978;Q9NSE4	P22061;Q13813;O43852;Q9NRW1;Q13509;Q08379;Q5JTZ9;Q8NEZ5;P51610;Q04637;Q00653;P20339;Q96RU2;Q9Y6K9;Q13371;P61978;Q9NSE4	R-HSA-8956040;R-HSA-688136;R-HSA-5694418;R-HSA-8850560;R-HSA-156808;R-HSA-8955289;R-HSA-380177;R-HSA-156823;R-HSA-380176;R-HSA-157849;R-HSA-4755411;R-HSA-8956200;R-HSA-6807877;R-HSA-8952618;R-HSA-6807875;R-HSA-8952620;R-HSA-5696627;R-HSA-72619;R-HSA-72621;R-HSA-8867370;R-HSA-6814409;R-HSA-8955706;R-HSA-6814418;R-HSA-72631;R-HSA-5694446;R-HSA-72635;R-HSA-8866105;R-HSA-5694441;R-HSA-389956;R-HSA-88…
R-HSA-5653656	Vesicle-mediated transport	16	761	0.0682817	0.000869978	0.127887	59	251	0.0212784	4.51938	9606	Homo sapiens	P02792;Q5VZ89;Q12756;P22681;Q13813;P50570;Q9NRW1;Q13509;Q8TD16;Q08379;Q96CV9;P52732;P20339;Q07954;O60343;Q15276	P02792;Q5VZ89;Q12756;P22681;Q13813;P50570;Q9NRW1;Q13509;Q8TD16;Q08379;Q96CV9;P52732;P20339;Q07954;O60343;Q15276	R-HSA-1445143;R-HSA-8868230;R-HSA-5694418;R-HSA-1445149;R-HSA-8868236;R-HSA-1445144;R-HSA-8854303;R-HSA-2316347;R-HSA-8876188;R-HSA-8871194;R-HSA-8871193;R-HSA-190877;R-HSA-8854182;R-HSA-6807877;R-HSA-2187266;R-HSA-6807875;R-HSA-8876193;R-HSA-8867756;R-HSA-8868651;R-HSA-8867754;R-HSA-8868648;R-HSA-8868661;R-HSA-8868660;R-HSA-196017;R-HSA-8868659;R-HSA-8868658;R-HSA-190519;R-HSA-5694446;R-HSA-8869…
R-HSA-168256	Immune System	16	2233	0.200359	0.841081	0.841081	72	1492	0.126484	5.07562	9606	Homo sapiens	Q13501;P02792;P14618;P22681;Q13813;P50570;O75369;Q32MZ4;Q13509;Q8NEZ5;P52732;Q04637;Q00653;P17066;Q9Y6K9;Q7Z6Z7	Q13501;P02792;P14618;P22681;Q13813;P50570;O75369;Q32MZ4;Q13509;Q8NEZ5;P52732;Q04637;Q00653;P17066;Q9Y6K9;Q7Z6Z7	R-HSA-975119;R-HSA-741386;R-HSA-688136;R-HSA-688137;R-HSA-2130725;R-HSA-202500;R-HSA-1168641;R-HSA-8863895;R-HSA-9604480;R-HSA-5609665;R-HSA-933530;R-HSA-3134904;R-HSA-3134901;R-HSA-2130619;R-HSA-912790;R-HSA-3134896;R-HSA-879917;R-HSA-2213248;R-HSA-202534;R-HSA-706479;R-HSA-450337;R-HSA-741411;R-HSA-450346;R-HSA-933539;R-HSA-202541;R-HSA-448703;R-HSA-507719;R-HSA-8951498;R-HSA-937032;R-HSA-62241…
R-HSA-162582	Signal Transduction	16	2758	0.247465	0.981033	0.981033	76	2200	0.186504	4.795	9606	Homo sapiens	Q13501;P30622;Q6VN20;Q96EP0;P22681;Q13813;P50570;Q13509;Q7Z3T8;Q9NSV4;O75044;Q04637;Q9Y6K9;Q07954;Q9Y6A5;Q96EA4	Q13501;P30622;Q6VN20;Q96EP0;P22681;Q13813;P50570;Q13509;Q7Z3T8;Q9NSV4;O75044;Q04637;Q9Y6K9;Q07954;Q9Y6A5;Q96EA4	R-HSA-5357776;R-HSA-5357904;R-HSA-165766;R-HSA-2404131;R-HSA-201476;R-HSA-5666129;R-HSA-5626962;R-HSA-183051;R-HSA-4332235;R-HSA-183055;R-HSA-183052;R-HSA-4332236;R-HSA-204947;R-HSA-183058;R-HSA-8851859;R-HSA-1295622;R-HSA-193684;R-HSA-1295621;R-HSA-5654734;R-HSA-183067;R-HSA-5661517;R-HSA-193694;R-HSA-5654730;R-HSA-8851866;R-HSA-209566;R-HSA-5654729;R-HSA-183072;R-HSA-193703;R-HSA-5666160;R-HSA-…
R-HSA-199991	Membrane Trafficking	15	635	0.0569762	0.000390283	0.127887	55	218	0.0184808	4.272	9606	Homo sapiens	P02792;Q5VZ89;Q12756;P22681;Q13813;P50570;Q9NRW1;Q13509;Q8TD16;Q08379;Q96CV9;P52732;P20339;O60343;Q15276	P02792;Q5VZ89;Q12756;P22681;Q13813;P50570;Q9NRW1;Q13509;Q8TD16;Q08379;Q96CV9;P52732;P20339;O60343;Q15276	R-HSA-1445143;R-HSA-8868230;R-HSA-5694418;R-HSA-1445149;R-HSA-8868236;R-HSA-1445144;R-HSA-8854303;R-HSA-2316347;R-HSA-8876188;R-HSA-8871194;R-HSA-8871193;R-HSA-190877;R-HSA-8854182;R-HSA-6807877;R-HSA-6807875;R-HSA-8876193;R-HSA-8867756;R-HSA-8868651;R-HSA-8867754;R-HSA-8868648;R-HSA-8868661;R-HSA-8868660;R-HSA-196017;R-HSA-8868659;R-HSA-8868658;R-HSA-190519;R-HSA-5694446;R-HSA-8869438;R-HSA-1905…
R-HSA-597592	Post-translational protein modification	12	1417	0.127142	0.58606	0.58606	34	512	0.0434045	4.30167	9606	Homo sapiens	Q00653;P20339;Q96RU2;Q13813;O43852;Q9Y6K9;Q9NRW1;Q13509;Q08379;Q8NEZ5;P61978;P51610	Q00653;P20339;Q96RU2;Q13813;O43852;Q9Y6K9;Q9NRW1;Q13509;Q08379;Q8NEZ5;P61978;P51610	R-HSA-8956040;R-HSA-8870469;R-HSA-688136;R-HSA-5694418;R-HSA-5696914;R-HSA-8870466;R-HSA-4570499;R-HSA-5689630;R-HSA-8955712;R-HSA-6809006;R-HSA-6809003;R-HSA-8955289;R-HSA-5690759;R-HSA-6809011;R-HSA-6809010;R-HSA-8955869;R-HSA-4755411;R-HSA-4755479;R-HSA-8956200;R-HSA-8955241;R-HSA-6807877;R-HSA-8952618;R-HSA-6807875;R-HSA-8952620;R-HSA-5696627;R-HSA-8952289;R-HSA-8865774;R-HSA-8867370;R-HSA-56…
R-HSA-1430728	Metabolism	12	2132	0.191297	0.971246	0.971246	17	1979	0.167769	6.30333	9606	Homo sapiens	P06733;P20339;P31327;P14618;Q3SY69;P50570;Q9NQX3;Q07954;P28161;P05165;P23378	P06733;P20339;P31327;P14618-2;Q3SY69;P14618-1;P50570;Q9NQX3;Q07954;P28161;P05165;P23378	R-HSA-6808487;R-HSA-8871366;R-HSA-947531;R-HSA-2404131;R-HSA-3065959;R-HSA-2993447;R-HSA-203625;R-HSA-71660;R-HSA-203662;R-HSA-203565;R-HSA-176054;R-HSA-3323111;R-HSA-71031;R-HSA-71670;R-HSA-5693967;R-HSA-70555;R-HSA-70494
R-HSA-168249	Innate Immune System	9	1183	0.106146	0.713219	0.713219	45	651	0.0551882	5.14556	9606	Homo sapiens	Q00653;P02792;P14618;Q13813;P17066;P50570;Q9Y6K9;Q7Z6Z7;Q32MZ4	Q00653;P02792;P14618;Q13813;P17066;P50570;Q9Y6K9;Q7Z6Z7;Q32MZ4	R-HSA-975119;R-HSA-741386;R-HSA-688136;R-HSA-688137;R-HSA-937032;R-HSA-622415;R-HSA-937029;R-HSA-168910;R-HSA-9014343;R-HSA-168140;R-HSA-9604480;R-HSA-688985;R-HSA-9603905;R-HSA-5609665;R-HSA-933530;R-HSA-6800434;R-HSA-2730876;R-HSA-3134904;R-HSA-9630923;R-HSA-3134901;R-HSA-3134896;R-HSA-168166;R-HSA-202534;R-HSA-706479;R-HSA-5684275;R-HSA-5607731;R-HSA-450337;R-HSA-741411;R-HSA-5607741;R-HSA-560…
R-HSA-1643685	Disease	8	1177	0.105608	0.815955	0.815955	51	943	0.0799424	4.185	9606	Homo sapiens	Q00653;P20810;P22681;Q9Y6K9;Q9Y5B0;Q32MZ4;Q08379;P05165	Q00653;P20810;P22681;Q9Y6K9;Q9Y5B0;Q32MZ4;Q08379;P05165	R-HSA-167181;R-HSA-167191;R-HSA-5262921;R-HSA-167192;R-HSA-167196;R-HSA-167197;R-HSA-8868134;R-HSA-167459;R-HSA-167072;R-HSA-8863012;R-HSA-1839039;R-HSA-8868260;R-HSA-167076;R-HSA-167077;R-HSA-167083;R-HSA-1839031;R-HSA-167087;R-HSA-167084;R-HSA-167085;R-HSA-167090;R-HSA-167478;R-HSA-167481;R-HSA-5228811;R-HSA-1839065;R-HSA-1225949;R-HSA-170706;R-HSA-8876246;R-HSA-170704;R-HSA-8876240;R-HSA-88762…
R-HSA-69278	Cell Cycle, Mitotic	7	515	0.0462091	0.162049	0.23676	31	322	0.0272974	4.59857	9606	Homo sapiens	P30622;Q13509;Q08379;Q8TD19;Q9NYZ3;Q96CV9;Q96EA4	P30622;Q13509;Q08379;Q8TD19;Q9NYZ3;Q96CV9;Q96EA4	R-HSA-375302;R-HSA-2172194;R-HSA-2467809;R-HSA-2562594;R-HSA-8852354;R-HSA-2467811;R-HSA-1638803;R-HSA-8852362;R-HSA-8852298;R-HSA-2990880;R-HSA-2984226;R-HSA-8852306;R-HSA-3002811;R-HSA-380316;R-HSA-8852317;R-HSA-2468287;R-HSA-2980720;R-HSA-8852324;R-HSA-2314566;R-HSA-2314569;R-HSA-8852331;R-HSA-2214351;R-HSA-2984258;R-HSA-2984220;R-HSA-2484822;R-HSA-8852337;R-HSA-2172183;R-HSA-8852351;R-HSA-256…
R-HSA-1640170	Cell Cycle	7	622	0.0558098	0.29773	0.29773	35	410	0.0347575	4.59857	9606	Homo sapiens	P30622;Q13509;Q08379;Q8TD19;Q9NYZ3;Q96CV9;Q96EA4	P30622;Q13509;Q08379;Q8TD19;Q9NYZ3;Q96CV9;Q96EA4	R-HSA-375302;R-HSA-2172194;R-HSA-2467809;R-HSA-2562594;R-HSA-8852354;R-HSA-2467811;R-HSA-1638803;R-HSA-8852362;R-HSA-8852298;R-HSA-2990880;R-HSA-2984226;R-HSA-8852306;R-HSA-3002811;R-HSA-380316;R-HSA-8852317;R-HSA-2468287;R-HSA-2980720;R-HSA-8852324;R-HSA-141409;R-HSA-2314566;R-HSA-2314569;R-HSA-8852331;R-HSA-141422;R-HSA-2214351;R-HSA-2984258;R-HSA-2984220;R-HSA-2484822;R-HSA-141431;R-HSA-885233…
R-HSA-109582	Hemostasis	6	722	0.0647824	0.605358	0.605358	6	327	0.0277213	5.02667	9606	Homo sapiens	P20339;Q12756;O43852;P12814;Q13509;P52732	P20339;Q12756;O43852;P12814;Q13509;P52732	R-HSA-984606;R-HSA-983259;R-HSA-481007;R-HSA-350745;R-HSA-983266;R-HSA-1011600
R-HSA-1280215	Cytokine Signaling in Immune system	6	777	0.0697174	0.676655	0.676655	28	640	0.0542557	4.86333	9606	Homo sapiens	Q13501;Q04637;Q00653;P22681;Q9Y6K9;O75369	Q13501;Q04637;Q00653;P22681;Q9Y6K9;O75369	R-HSA-507719;R-HSA-168140;R-HSA-912734;R-HSA-5609665;R-HSA-9630923;R-HSA-912724;R-HSA-912727;R-HSA-912790;R-HSA-879917;R-HSA-1112690;R-HSA-1678842;R-HSA-168166;R-HSA-5684275;R-HSA-5607731;R-HSA-1169398;R-HSA-450337;R-HSA-5607741;R-HSA-450346;R-HSA-451561;R-HSA-5607725;R-HSA-912629;R-HSA-448703;R-HSA-168184;R-HSA-5607726;R-HSA-5684267;R-HSA-5607720;R-HSA-5607723;R-HSA-912627
R-HSA-1280218	Adaptive Immune System	6	943	0.0846119	0.838884	0.838884	16	260	0.0220414	4.16	9606	Homo sapiens	P50570;Q9Y6K9;Q7Z6Z7;Q13509;Q8NEZ5;P52732	P50570;Q9Y6K9;Q7Z6Z7;Q13509;Q8NEZ5;P52732	R-HSA-2213248;R-HSA-8951498;R-HSA-983147;R-HSA-202534;R-HSA-2130725;R-HSA-202500;R-HSA-983140;R-HSA-1168637;R-HSA-202541;R-HSA-1168638;R-HSA-1168641;R-HSA-8863895;R-HSA-2130641;R-HSA-983157;R-HSA-983156;R-HSA-2130619
R-HSA-9007101	Rab regulation of trafficking	5	123	0.0110363	0.0045592	0.23676	6	35	0.00296711	4.564	9606	Homo sapiens	P20339;Q5VZ89;Q9NRW1;Q96CV9;Q15276	P20339;Q5VZ89;Q9NRW1;Q96CV9;Q15276	R-HSA-8854182;R-HSA-8876193;R-HSA-8854303;R-HSA-8854222;R-HSA-8876188;R-HSA-8875320
R-HSA-8856688	Golgi-to-ER retrograde transport	5	137	0.0122925	0.0071108	0.23676	5	18	0.00152594	4.116	9606	Homo sapiens	Q12756;Q9NRW1;Q13509;Q8TD16;P52732	Q12756;Q9NRW1;Q13509;Q8TD16;P52732	R-HSA-8849350;R-HSA-8849348;R-HSA-6811426;R-HSA-6811423;R-HSA-8849353
R-HSA-5663220	RHO GTPases Activate Formins	5	141	0.0126514	0.00799285	0.23676	6	27	0.00228891	4.094	9606	Homo sapiens	P30622;Q13509;Q9NSV4;O75044;Q96EA4	P30622;Q13509;Q9NSV4;O75044;Q96EA4	R-HSA-5666070;R-HSA-5666160;R-HSA-5665809;R-HSA-5666129;R-HSA-5665802;R-HSA-5666169
R-HSA-6811442	Intra-Golgi and retrograde Golgi-to-ER traffic	5	206	0.0184836	0.0344252	0.23676	9	48	0.00406918	4.116	9606	Homo sapiens	Q12756;Q9NRW1;Q13509;Q8TD16;P52732	Q12756;Q9NRW1;Q13509;Q8TD16;P52732	R-HSA-6811431;R-HSA-8849350;R-HSA-6811429;R-HSA-6811428;R-HSA-8849348;R-HSA-6811426;R-HSA-6811423;R-HSA-6814682;R-HSA-8849353
R-HSA-195258	RHO GTPase Effectors	5	295	0.0264693	0.115334	0.23676	7	112	0.00949474	4.094	9606	Homo sapiens	P30622;Q13509;Q9NSV4;O75044;Q96EA4	P30622;Q13509;Q9NSV4;O75044;Q96EA4	R-HSA-5666070;R-HSA-5666160;R-HSA-5665809;R-HSA-5666129;R-HSA-5665802;R-HSA-5666169;R-HSA-5672329
R-HSA-68886	M Phase	5	371	0.0332885	0.222187	0.23676	18	66	0.00559512	4.204	9606	Homo sapiens	P30622;Q13509;Q08379;Q8TD19;Q96EA4	P30622;Q13509;Q08379;Q8TD19;Q96EA4	R-HSA-375302;R-HSA-2172194;R-HSA-2467809;R-HSA-2314566;R-HSA-2467811;R-HSA-1638803;R-HSA-2314569;R-HSA-2990880;R-HSA-2214351;R-HSA-2984226;R-HSA-2984258;R-HSA-2984220;R-HSA-2484822;R-HSA-2172183;R-HSA-380316;R-HSA-2468287;R-HSA-1638821;R-HSA-2980720
R-HSA-194315	Signaling by Rho GTPases	5	426	0.0382234	0.313125	0.313125	8	117	0.00991862	4.094	9606	Homo sapiens	P30622;Q13509;Q9NSV4;O75044;Q96EA4	P30622;Q13509;Q9NSV4;O75044;Q96EA4	R-HSA-5666070;R-HSA-5666160;R-HSA-5665809;R-HSA-5666129;R-HSA-194922;R-HSA-5665802;R-HSA-5666169;R-HSA-5672329
R-HSA-6798695	Neutrophil degranulation	5	480	0.0430686	0.406566	0.406566	5	10	0.000847745	6.128	9606	Homo sapiens	P02792;P14618;Q13813;P17066;Q7Z6Z7	P02792;P14618;Q13813;P17066;Q7Z6Z7	R-HSA-6800434;R-HSA-6798751;R-HSA-6798749;R-HSA-6798748;R-HSA-6798745
R-HSA-422475	Axon guidance	5	557	0.0499776	0.536343	0.536343	16	296	0.0250933	4.608	9606	Homo sapiens	Q04637;Q13813;P50570;Q13509;O75044	Q04637;Q13813;P50570;Q13509;O75044	R-HSA-445071;R-HSA-392751;R-HSA-373739;R-HSA-392053;R-HSA-555065;R-HSA-392054;R-HSA-428533;R-HSA-445077;R-HSA-376145;R-HSA-9014652;R-HSA-392051;R-HSA-391868;R-HSA-391871;R-HSA-9014610;R-HSA-391865;R-HSA-391866
R-HSA-8953854	Metabolism of RNA	5	675	0.0605653	0.706012	0.706012	22	187	0.0158528	5.318	9606	Homo sapiens	Q04637;Q9UJA5;Q15637;P61978;O43390	Q04637;Q9UJA5;Q15637;P61978;O43390	R-HSA-72160;R-HSA-72130;R-HSA-927789;R-HSA-430021;R-HSA-6783492;R-HSA-429955;R-HSA-72103;R-HSA-8941312;R-HSA-72139;R-HSA-72107;R-HSA-927813;R-HSA-72143;R-HSA-429992;R-HSA-450551;R-HSA-927836;R-HSA-450580;R-HSA-927832;R-HSA-156661;R-HSA-927830;R-HSA-72124;R-HSA-72127;R-HSA-927889
R-HSA-1266738	Developmental Biology	5	1054	0.0945716	0.958062	0.958062	16	483	0.0409461	4.608	9606	Homo sapiens	Q04637;Q13813;P50570;Q13509;O75044	Q04637;Q13813;P50570;Q13509;O75044	R-HSA-445071;R-HSA-392751;R-HSA-373739;R-HSA-392053;R-HSA-555065;R-HSA-392054;R-HSA-428533;R-HSA-445077;R-HSA-376145;R-HSA-9014652;R-HSA-392051;R-HSA-391868;R-HSA-391871;R-HSA-9014610;R-HSA-391865;R-HSA-391866
R-HSA-8854214	TBC/RABGAPs	4	45	0.00403769	0.000682918	0.127887	3	14	0.00118684	4.635	9606	Homo sapiens	P20339;Q9NRW1;Q96CV9;Q15276	P20339;Q9NRW1;Q96CV9;Q15276	R-HSA-8854182;R-HSA-8854303;R-HSA-8854222
R-HSA-1500931	Cell-Cell communication	4	130	0.0116644	0.0272753	0.23676	5	60	0.00508647	5.9675	9606	Homo sapiens	Q14315;Q13813;P12814;P55196	Q14315;Q13813;P55196-2;P12814	R-HSA-430308;R-HSA-433725;R-HSA-451403;R-HSA-419003;R-HSA-430347
R-HSA-983231	Factors involved in megakaryocyte development and platelet production	4	160	0.0143562	0.0515875	0.23676	4	43	0.0036453	4.0775	9606	Homo sapiens	P20339;Q12756;Q13509;P52732	P20339;Q12756;Q13509;P52732	R-HSA-984606;R-HSA-983259;R-HSA-983266;R-HSA-1011600
R-HSA-196854	Metabolism of vitamins and cofactors	4	192	0.0172275	0.0872122	0.23676	6	185	0.0156833	5.7575	9606	Homo sapiens	Q3SY69;Q9NQX3;Q07954;P05165	Q3SY69;Q9NQX3;Q07954;P05165	R-HSA-6808487;R-HSA-947531;R-HSA-3323111;R-HSA-2404131;R-HSA-3065959;R-HSA-2993447
R-HSA-3247509	Chromatin modifying enzymes	4	240	0.0215343	0.157367	0.23676	9	84	0.00712106	4	9606	Homo sapiens	Q00653;Q96LA8;P41229;P51610	Q00653;Q96LA8;P41229;P51610	R-HSA-5661126;R-HSA-8865237;R-HSA-5205820;R-HSA-5205798;R-HSA-5661116;R-HSA-5229203;R-HSA-4754181;R-HSA-5205824;R-HSA-3321805
R-HSA-4839726	Chromatin organization	4	240	0.0215343	0.157367	0.23676	9	84	0.00712106	4	9606	Homo sapiens	Q00653;Q96LA8;P41229;P51610	Q00653;Q96LA8;P41229;P51610	R-HSA-5661126;R-HSA-8865237;R-HSA-5205820;R-HSA-5205798;R-HSA-5661116;R-HSA-5229203;R-HSA-4754181;R-HSA-5205824;R-HSA-3321805
R-HSA-1852241	Organelle biogenesis and maintenance	4	298	0.0267384	0.261393	0.261393	18	86	0.00729061	4.5825	9606	Homo sapiens	Q8IW35;Q13509;P51610;Q16891	Q8IW35;Q13509;P51610;Q16891	R-HSA-5624949;R-HSA-8949609;R-HSA-5626228;R-HSA-1592250;R-HSA-1592252;R-HSA-5625424;R-HSA-5626227;R-HSA-5625426;R-HSA-5624952;R-HSA-5618328;R-HSA-5618331;R-HSA-1592232;R-HSA-5625421;R-HSA-5626220;R-HSA-2466367;R-HSA-5626223;R-HSA-5625416;R-HSA-5626699
R-HSA-449147	Signaling by Interleukins	4	458	0.0410947	0.567889	0.567889	20	492	0.0417091	3.735	9606	Homo sapiens	Q13501;Q00653;P22681;Q9Y6K9	Q13501;Q00653;P22681;Q9Y6K9	R-HSA-507719;R-HSA-879917;R-HSA-1112690;R-HSA-168166;R-HSA-5684275;R-HSA-450337;R-HSA-450346;R-HSA-168140;R-HSA-451561;R-HSA-912734;R-HSA-5609665;R-HSA-912629;R-HSA-9630923;R-HSA-448703;R-HSA-912724;R-HSA-168184;R-HSA-912727;R-HSA-912790;R-HSA-5684267;R-HSA-912627
R-HSA-8953897	Cellular responses to external stimuli	4	505	0.0453118	0.645378	0.645378	21	266	0.02255	5.195	9606	Homo sapiens	Q13501;Q8TDY2;P17066;Q13509	Q13501;Q8TDY2;P17066;Q13509	R-HSA-1632857;R-HSA-5251955;R-HSA-5683925;R-HSA-5205673;R-HSA-5251959;R-HSA-5672817;R-HSA-5675868;R-HSA-5205663;R-HSA-5679239;R-HSA-5679205;R-HSA-5618080;R-HSA-5251942;R-HSA-5675790;R-HSA-5252041;R-HSA-5665868;R-HSA-5672010;R-HSA-5672011;R-HSA-5672008;R-HSA-5673768;R-HSA-5205649;R-HSA-5252079
R-HSA-6811436	COPI-independent Golgi-to-ER retrograde traffic	3	53	0.0047555	0.0113763	0.23676	3	7	0.000593421	3.88667	9606	Homo sapiens	Q9NRW1;Q13509;Q8TD16	Q9NRW1;Q13509;Q8TD16	R-HSA-8849350;R-HSA-8849348;R-HSA-8849353
R-HSA-1834949	Cytosolic sensors of pathogen-associated DNA	3	63	0.00565276	0.0179603	0.23676	6	48	0.00406918	3.96667	9606	Homo sapiens	Q00653;Q9Y6K9;Q32MZ4	Q00653;Q9Y6K9;Q32MZ4	R-HSA-9604480;R-HSA-3134904;R-HSA-3134901;R-HSA-168910;R-HSA-168140;R-HSA-3134896
R-HSA-983189	Kinesins	3	64	0.00574249	0.0187133	0.23676	3	14	0.00118684	4.16333	9606	Homo sapiens	Q12756;Q13509;P52732	Q12756;Q13509;P52732	R-HSA-984606;R-HSA-983259;R-HSA-983266
R-HSA-70171	Glycolysis	3	78	0.00699865	0.0310786	0.23676	2	24	0.00203459	11.13	9606	Homo sapiens	P06733;P14618	P06733;P14618-2;P14618-1	R-HSA-71670;R-HSA-71660
R-HSA-8876198	RAB GEFs exchange GTP for GDP on RABs	3	90	0.00807537	0.0443603	0.23676	3	21	0.00178026	4.2	9606	Homo sapiens	P20339;Q5VZ89;Q9NRW1	P20339;Q5VZ89;Q9NRW1	R-HSA-8876193;R-HSA-8876188;R-HSA-8875320
R-HSA-446728	Cell junction organization	3	92	0.00825482	0.0468088	0.23676	4	37	0.00313666	6.17	9606	Homo sapiens	Q14315;P12814;P55196	Q14315;P55196-2;P12814	R-HSA-430308;R-HSA-433725;R-HSA-419003;R-HSA-430347
R-HSA-70326	Glucose metabolism	3	98	0.00879318	0.0545459	0.23676	3	49	0.00415395	11.13	9606	Homo sapiens	P06733;P14618	P06733;P14618-2;P14618-1	R-HSA-71670;R-HSA-71660;R-HSA-70494
R-HSA-6807878	COPI-mediated anterograde transport	3	102	0.00915209	0.0600235	0.23676	6	12	0.00101729	4.33	9606	Homo sapiens	Q13813;Q13509;Q08379	Q13813;Q13509;Q08379	R-HSA-6807877;R-HSA-6809011;R-HSA-6807875;R-HSA-6809010;R-HSA-6809006;R-HSA-6809003
R-HSA-9020702	Interleukin-1 signaling	3	102	0.00915209	0.0600235	0.23676	9	46	0.00389963	3.78667	9606	Homo sapiens	Q13501;Q00653;Q9Y6K9	Q13501;Q00653;Q9Y6K9	R-HSA-507719;R-HSA-5609665;R-HSA-168166;R-HSA-5684275;R-HSA-9630923;R-HSA-168184;R-HSA-5684267;R-HSA-168140;R-HSA-451561
R-HSA-6811434	COPI-dependent Golgi-to-ER retrograde traffic	3	103	0.00924181	0.061432	0.23676	2	11	0.000932519	4.16333	9606	Homo sapiens	Q12756;Q13509;P52732	Q12756;Q13509;P52732	R-HSA-6811426;R-HSA-6811423
R-HSA-373760	L1CAM interactions	3	121	0.0108569	0.0893221	0.23676	5	54	0.00457782	4.23333	9606	Homo sapiens	Q13813;P50570;Q13509	Q13813;P50570;Q13509	R-HSA-555065;R-HSA-445077;R-HSA-445071;R-HSA-392751;R-HSA-373739
R-HSA-2500257	Resolution of Sister Chromatid Cohesion	3	126	0.0113055	0.0978701	0.23676	4	8	0.000678196	4.05333	9606	Homo sapiens	P30622;Q13509;Q96EA4	P30622;Q13509;Q96EA4	R-HSA-2484822;R-HSA-1638803;R-HSA-2468287;R-HSA-1638821
R-HSA-196849	Metabolism of water-soluble vitamins and cofactors	3	126	0.0113055	0.0978701	0.23676	5	134	0.0113598	4.93333	9606	Homo sapiens	Q3SY69;Q9NQX3;P05165	Q3SY69;Q9NQX3;P05165	R-HSA-6808487;R-HSA-947531;R-HSA-3323111;R-HSA-3065959;R-HSA-2993447
R-HSA-166016	Toll Like Receptor 4 (TLR4) Cascade	3	129	0.0115747	0.103153	0.23676	12	95	0.00805358	3.76667	9606	Homo sapiens	Q00653;P50570;Q9Y6K9	Q00653;P50570;Q9Y6K9	R-HSA-5609665;R-HSA-168166;R-HSA-5684275;R-HSA-937032;R-HSA-450337;R-HSA-9630923;R-HSA-168184;R-HSA-937029;R-HSA-450346;R-HSA-2201293;R-HSA-5684267;R-HSA-168140
R-HSA-446652	Interleukin-1 family signaling	3	141	0.0126514	0.125368	0.23676	10	79	0.00669719	3.78667	9606	Homo sapiens	Q13501;Q00653;Q9Y6K9	Q13501;Q00653;Q9Y6K9	R-HSA-507719;R-HSA-5609665;R-HSA-168166;R-HSA-5684275;R-HSA-9630923;R-HSA-448703;R-HSA-168184;R-HSA-5684267;R-HSA-168140;R-HSA-451561
R-HSA-2132295	MHC class II antigen presentation	3	142	0.0127411	0.127293	0.23676	5	26	0.00220414	3.91333	9606	Homo sapiens	P50570;Q13509;P52732	P50570;Q13509;P52732	R-HSA-2213248;R-HSA-2130641;R-HSA-8951498;R-HSA-2130725;R-HSA-2130619
R-HSA-8856828	Clathrin-mediated endocytosis	3	145	0.0130103	0.133131	0.23676	16	34	0.00288233	3.72333	9606	Homo sapiens	P20339;P22681;P50570	P20339;P22681;P50570	R-HSA-8868071;R-HSA-8866279;R-HSA-8868230;R-HSA-8868236;R-HSA-8867756;R-HSA-8868651;R-HSA-8867754;R-HSA-8868648;R-HSA-8868072;R-HSA-8868661;R-HSA-8868660;R-HSA-8868659;R-HSA-8868658;R-HSA-8869438;R-HSA-8871194;R-HSA-8871193
R-HSA-73887	Death Receptor Signalling	3	147	0.0131898	0.137075	0.23676	13	90	0.0076297	4.91	9606	Homo sapiens	Q13501;Q96EP0;Q9Y6K9	Q13501;Q96EP0;Q9Y6K9	R-HSA-5357776;R-HSA-5357904;R-HSA-193703;R-HSA-5626962;R-HSA-193641;R-HSA-193705;R-HSA-204947;R-HSA-205008;R-HSA-5357831;R-HSA-193684;R-HSA-5661517;R-HSA-193694;R-HSA-209566
R-HSA-199977	ER to Golgi Anterograde Transport	3	155	0.0139076	0.15324	0.23676	9	39	0.00330621	4.33	9606	Homo sapiens	Q13813;Q13509;Q08379	Q13813;Q13509;Q08379	R-HSA-6807877;R-HSA-6809011;R-HSA-6807875;R-HSA-5694418;R-HSA-6809010;R-HSA-5694446;R-HSA-6809006;R-HSA-6809003;R-HSA-5694441
R-HSA-168898	Toll-like Receptor Cascades	3	156	0.0139973	0.155302	0.23676	14	182	0.015429	3.76667	9606	Homo sapiens	Q00653;P50570;Q9Y6K9	Q00653;P50570;Q9Y6K9	R-HSA-975119;R-HSA-168166;R-HSA-5684275;R-HSA-937032;R-HSA-450337;R-HSA-937029;R-HSA-450346;R-HSA-2201293;R-HSA-9014343;R-HSA-168140;R-HSA-5609665;R-HSA-9630923;R-HSA-168184;R-HSA-5684267
R-HSA-3108232	SUMO E3 ligases SUMOylate target proteins	3	174	0.0156124	0.193803	0.23676	3	130	0.0110207	4.48	9606	Homo sapiens	Q00653;Q9Y6K9;P61978	Q00653;Q9Y6K9;P61978	R-HSA-4570499;R-HSA-4755411;R-HSA-4755479
R-HSA-72163	mRNA Splicing - Major Pathway	3	180	0.0161507	0.207138	0.23676	8	9	0.00076297	5.70667	9606	Homo sapiens	Q15637;P61978;O43390	Q15637;P61978;O43390	R-HSA-72160;R-HSA-72130;R-HSA-156661;R-HSA-72139;R-HSA-72107;R-HSA-72124;R-HSA-72143;R-HSA-72127
R-HSA-2990846	SUMOylation	3	180	0.0161507	0.207138	0.23676	3	139	0.0117837	4.48	9606	Homo sapiens	Q00653;Q9Y6K9;P61978	Q00653;Q9Y6K9;P61978	R-HSA-4570499;R-HSA-4755411;R-HSA-4755479
R-HSA-948021	Transport to the Golgi and subsequent modification	3	186	0.0166891	0.220678	0.23676	9	59	0.0050017	4.33	9606	Homo sapiens	Q13813;Q13509;Q08379	Q13813;Q13509;Q08379	R-HSA-6807877;R-HSA-6809011;R-HSA-6807875;R-HSA-5694418;R-HSA-6809010;R-HSA-5694446;R-HSA-6809006;R-HSA-6809003;R-HSA-5694441
R-HSA-72172	mRNA Splicing	3	188	0.0168686	0.225233	0.23676	8	14	0.00118684	5.70667	9606	Homo sapiens	Q15637;P61978;O43390	Q15637;P61978;O43390	R-HSA-72160;R-HSA-72130;R-HSA-156661;R-HSA-72139;R-HSA-72107;R-HSA-72124;R-HSA-72143;R-HSA-72127
R-HSA-2467813	Separation of Sister Chromatids	3	190	0.017048	0.229806	0.23676	2	8	0.000678196	4.05333	9606	Homo sapiens	P30622;Q13509;Q96EA4	P30622;Q13509;Q96EA4	R-HSA-2467809;R-HSA-2467811
R-HSA-69275	G2/M Transition	3	198	0.0177658	0.248267	0.248267	13	78	0.00661241	4.91333	9606	Homo sapiens	Q13509;Q9NYZ3;Q96CV9	Q13509;Q9NYZ3;Q96CV9	R-HSA-8852324;R-HSA-2562594;R-HSA-8852354;R-HSA-8852331;R-HSA-8852362;R-HSA-8852298;R-HSA-8852306;R-HSA-3002811;R-HSA-8852337;R-HSA-8852351;R-HSA-2562526;R-HSA-8852317;R-HSA-8852280
R-HSA-68877	Mitotic Prometaphase	3	199	0.0178555	0.250592	0.250592	6	15	0.00127162	4.05333	9606	Homo sapiens	P30622;Q13509;Q96EA4	P30622;Q13509;Q96EA4	R-HSA-2484822;R-HSA-375302;R-HSA-380316;R-HSA-1638803;R-HSA-2468287;R-HSA-1638821
R-HSA-453274	Mitotic G2-G2/M phases	3	200	0.0179453	0.25292	0.25292	13	80	0.00678196	4.91333	9606	Homo sapiens	Q13509;Q9NYZ3;Q96CV9	Q13509;Q9NYZ3;Q96CV9	R-HSA-8852324;R-HSA-2562594;R-HSA-8852354;R-HSA-8852331;R-HSA-8852362;R-HSA-8852298;R-HSA-8852306;R-HSA-3002811;R-HSA-8852337;R-HSA-8852351;R-HSA-2562526;R-HSA-8852317;R-HSA-8852280
R-HSA-68882	Mitotic Anaphase	3	202	0.0181247	0.257586	0.257586	2	11	0.000932519	4.05333	9606	Homo sapiens	P30622;Q13509;Q96EA4	P30622;Q13509;Q96EA4	R-HSA-2467809;R-HSA-2467811
R-HSA-2555396	Mitotic Metaphase and Anaphase	3	203	0.0182144	0.259923	0.259923	2	12	0.00101729	4.05333	9606	Homo sapiens	P30622;Q13509;Q96EA4	P30622;Q13509;Q96EA4	R-HSA-2467809;R-HSA-2467811
R-HSA-72203	Processing of Capped Intron-Containing Pre-mRNA	3	245	0.021983	0.359483	0.359483	9	32	0.00271278	5.70667	9606	Homo sapiens	Q15637;P61978;O43390	Q15637;P61978;O43390	R-HSA-72160;R-HSA-72130;R-HSA-72103;R-HSA-156661;R-HSA-72139;R-HSA-72107;R-HSA-72124;R-HSA-72143;R-HSA-72127
R-HSA-69620	Cell Cycle Checkpoints	3	274	0.024585	0.427551	0.427551	7	56	0.00474737	4.67333	9606	Homo sapiens	P30622;Q9NYZ3;Q96EA4	P30622;Q9NYZ3;Q96EA4	R-HSA-141409;R-HSA-8852354;R-HSA-141431;R-HSA-8852337;R-HSA-8852351;R-HSA-141422;R-HSA-141439
R-HSA-5688426	Deubiquitination	3	282	0.0253028	0.445934	0.445934	7	77	0.00652764	3.82	9606	Homo sapiens	Q96RU2;Q9Y6K9;P51610	Q96RU2;Q9Y6K9;P51610	R-HSA-5690790;R-HSA-5690759;R-HSA-688136;R-HSA-5696914;R-HSA-5696627;R-HSA-5690785;R-HSA-5689630
R-HSA-72766	Translation	3	294	0.0263795	0.473074	0.473074	11	99	0.00839268	4.51667	9606	Homo sapiens	Q04637;Q5JTZ9;Q9NSE4	Q04637;Q5JTZ9;Q9NSE4	R-HSA-380177;R-HSA-156823;R-HSA-380176;R-HSA-72647;R-HSA-72631;R-HSA-72697;R-HSA-72619;R-HSA-72635;R-HSA-156808;R-HSA-157849;R-HSA-72621
R-HSA-71387	Metabolism of carbohydrates	3	300	0.0269179	0.486424	0.486424	3	235	0.019922	11.13	9606	Homo sapiens	P06733;P14618	P06733;P14618-2;P14618-1	R-HSA-71670;R-HSA-71660;R-HSA-70494
R-HSA-446203	Asparagine N-linked glycosylation	3	305	0.0273665	0.497428	0.497428	9	133	0.011275	4.33	9606	Homo sapiens	Q13813;Q13509;Q08379	Q13813;Q13509;Q08379	R-HSA-6807877;R-HSA-6809011;R-HSA-6807875;R-HSA-5694418;R-HSA-6809010;R-HSA-5694446;R-HSA-6809006;R-HSA-6809003;R-HSA-5694441
R-HSA-983169	Class I MHC mediated antigen processing & presentation	3	441	0.0395693	0.743093	0.743093	5	47	0.0039844	4.40667	9606	Homo sapiens	Q9Y6K9;Q7Z6Z7;Q8NEZ5	Q9Y6K9;Q7Z6Z7;Q8NEZ5	R-HSA-8863895;R-HSA-983147;R-HSA-983157;R-HSA-983156;R-HSA-983140
R-HSA-9006934	Signaling by Receptor Tyrosine Kinases	3	474	0.0425303	0.786027	0.786027	41	633	0.0536623	3.88667	9606	Homo sapiens	Q6VN20;P22681;P50570	Q6VN20;P22681;P50570	R-HSA-5654679;R-HSA-934604;R-HSA-5654677;R-HSA-5654672;R-HSA-5654673;R-HSA-182986;R-HSA-183051;R-HSA-8951490;R-HSA-5654684;R-HSA-182990;R-HSA-183055;R-HSA-183052;R-HSA-182988;R-HSA-183058;R-HSA-182994;R-HSA-182993;R-HSA-8851859;R-HSA-1295622;R-HSA-1295621;R-HSA-183002;R-HSA-5654734;R-HSA-183067;R-HSA-5654730;R-HSA-8851866;R-HSA-8875482;R-HSA-177501;R-HSA-5654729;R-HSA-8867047;R-HSA-183072;R-HSA-8…
R-HSA-212436	Generic Transcription Pathway	3	1234	0.110722	0.999029	0.999029	17	810	0.0686673	4.05	9606	Homo sapiens	Q96LA8;Q9Y5B0;Q92597	Q96LA8;Q9Y5B0;Q92597	R-HSA-8936584;R-HSA-8937097;R-HSA-6797606;R-HSA-8936608;R-HSA-8936995;R-HSA-8937113;R-HSA-8936989;R-HSA-8937118;R-HSA-8937022;R-HSA-5633314;R-HSA-6797616;R-HSA-6797712;R-HSA-8935730;R-HSA-8935731;R-HSA-8935732;R-HSA-8936628;R-HSA-8936599
R-HSA-73857	RNA Polymerase II Transcription	3	1356	0.121669	0.999644	0.999644	32	871	0.0738386	4.05	9606	Homo sapiens	Q96LA8;Q9Y5B0;Q92597	Q96LA8;Q9Y5B0;Q92597	R-HSA-8936584;R-HSA-113409;R-HSA-112385;R-HSA-8937097;R-HSA-6797606;R-HSA-113411;R-HSA-113413;R-HSA-113412;R-HSA-113414;R-HSA-112392;R-HSA-112395;R-HSA-112396;R-HSA-8937113;R-HSA-113429;R-HSA-8936989;R-HSA-8937118;R-HSA-6797616;R-HSA-8936599;R-HSA-8936608;R-HSA-8936995;R-HSA-8937022;R-HSA-5633314;R-HSA-6797712;R-HSA-8935730;R-HSA-112379;R-HSA-8935731;R-HSA-113402;R-HSA-8935732;R-HSA-8936628;R-HSA…
R-HSA-74160	Gene expression (Transcription)	3	1498	0.13441	0.999893	0.999893	32	981	0.0831638	4.05	9606	Homo sapiens	Q96LA8;Q9Y5B0;Q92597	Q96LA8;Q9Y5B0;Q92597	R-HSA-8936584;R-HSA-113409;R-HSA-112385;R-HSA-8937097;R-HSA-6797606;R-HSA-113411;R-HSA-113413;R-HSA-113412;R-HSA-113414;R-HSA-112392;R-HSA-112395;R-HSA-112396;R-HSA-8937113;R-HSA-113429;R-HSA-8936989;R-HSA-8937118;R-HSA-6797616;R-HSA-8936599;R-HSA-8936608;R-HSA-8936995;R-HSA-8937022;R-HSA-5633314;R-HSA-6797712;R-HSA-8935730;R-HSA-112379;R-HSA-8935731;R-HSA-113402;R-HSA-8935732;R-HSA-8936628;R-HSA…
R-HSA-5603029	IkBA variant leads to EDA-ID	2	7	0.000628084	0.00176527	0.19418	2	2	0.000169549	3.765	9606	Homo sapiens	Q00653;Q9Y6K9	Q00653;Q9Y6K9	R-HSA-5228811;R-HSA-9630921
R-HSA-4755510	SUMOylation of immune response proteins	2	11	0.00098699	0.00426174	0.23676	2	5	0.000423872	3.765	9606	Homo sapiens	Q00653;Q9Y6K9	Q00653;Q9Y6K9	R-HSA-4755411;R-HSA-4755479
R-HSA-1810476	RIP-mediated NFkB activation via ZBP1	2	17	0.00152535	0.00984072	0.23676	3	4	0.000339098	3.765	9606	Homo sapiens	Q00653;Q9Y6K9	Q00653;Q9Y6K9	R-HSA-9604480;R-HSA-168910;R-HSA-168140
R-HSA-446353	Cell-extracellular matrix interactions	2	18	0.00161507	0.0109707	0.23676	2	10	0.000847745	6.945	9606	Homo sapiens	Q14315;P12814	Q14315;P12814	R-HSA-430308;R-HSA-430347
R-HSA-1606322	ZBP1(DAI) mediated induction of type I IFNs	2	21	0.00188425	0.0146831	0.23676	3	10	0.000847745	3.765	9606	Homo sapiens	Q00653;Q9Y6K9	Q00653;Q9Y6K9	R-HSA-9604480;R-HSA-168910;R-HSA-168140
R-HSA-379726	Mitochondrial tRNA aminoacylation	2	21	0.00188425	0.0146831	0.23676	2	21	0.00178026	3.825	9606	Homo sapiens	Q5JTZ9;Q9NSE4	Q5JTZ9;Q9NSE4	R-HSA-380177;R-HSA-380176
R-HSA-8862803	Deregulated CDK5 triggers multiple neurodegenerative pathways in Alzheimer's disease models	2	22	0.00197398	0.0160248	0.23676	3	22	0.00186504	4.665	9606	Homo sapiens	P20810;Q08379	P20810;Q08379	R-HSA-8868134;R-HSA-8863012;R-HSA-8868260
R-HSA-8863678	Neurodegenerative Diseases	2	22	0.00197398	0.0160248	0.23676	3	22	0.00186504	4.665	9606	Homo sapiens	P20810;Q08379	P20810;Q08379	R-HSA-8868134;R-HSA-8863012;R-HSA-8868260
R-HSA-373753	Nephrin family interactions	2	23	0.00206371	0.0174169	0.23676	1	13	0.00110207	7.615	9606	Homo sapiens	Q13813;P12814	Q13813;P12814	R-HSA-451403
R-HSA-933542	TRAF6 mediated NF-kB activation	2	24	0.00215343	0.0188585	0.23676	3	4	0.000339098	3.765	9606	Homo sapiens	Q00653;Q9Y6K9	Q00653;Q9Y6K9	R-HSA-933530;R-HSA-168166;R-HSA-168140
R-HSA-5260271	Diseases of Immune System	2	27	0.00242261	0.023471	0.23676	4	15	0.00127162	3.765	9606	Homo sapiens	Q00653;Q9Y6K9	Q00653;Q9Y6K9	R-HSA-5228811;R-HSA-5228840;R-HSA-5262921;R-HSA-9630921
R-HSA-5602358	Diseases associated with the TLR signaling cascade	2	27	0.00242261	0.023471	0.23676	4	15	0.00127162	3.765	9606	Homo sapiens	Q00653;Q9Y6K9	Q00653;Q9Y6K9	R-HSA-5228811;R-HSA-5228840;R-HSA-5262921;R-HSA-9630921
R-HSA-5357956	TNFR1-induced NFkappaB signaling pathway	2	30	0.00269179	0.0284959	0.23676	2	5	0.000423872	5.45	9606	Homo sapiens	Q96EP0;Q9Y6K9	Q96EP0;Q9Y6K9	R-HSA-5357776;R-HSA-5357904
R-HSA-445989	TAK1 activates NFkB by phosphorylation and activation of IKKs complex	2	32	0.00287124	0.032063	0.23676	5	5	0.000423872	3.765	9606	Homo sapiens	Q00653;Q9Y6K9	Q00653;Q9Y6K9	R-HSA-5609665;R-HSA-168166;R-HSA-9630923;R-HSA-168184;R-HSA-168140
R-HSA-5626467	RHO GTPases activate IQGAPs	2	32	0.00287124	0.032063	0.23676	1	5	0.000423872	3.93	9606	Homo sapiens	P30622;Q13509	P30622;Q13509	R-HSA-5672329
R-HSA-5357905	Regulation of TNFR1 signaling	2	37	0.00331987	0.0416917	0.23676	3	14	0.00118684	5.45	9606	Homo sapiens	Q96EP0;Q9Y6K9	Q96EP0;Q9Y6K9	R-HSA-5357831;R-HSA-5626962;R-HSA-5661517
R-HSA-379724	tRNA Aminoacylation	2	42	0.00376851	0.052255	0.23676	2	42	0.00356053	3.825	9606	Homo sapiens	Q5JTZ9;Q9NSE4	Q5JTZ9;Q9NSE4	R-HSA-380177;R-HSA-380176
R-HSA-75893	TNF signaling	2	47	0.00421714	0.0636577	0.23676	5	29	0.00245846	5.45	9606	Homo sapiens	Q96EP0;Q9Y6K9	Q96EP0;Q9Y6K9	R-HSA-5357776;R-HSA-5357904;R-HSA-5357831;R-HSA-5626962;R-HSA-5661517
R-HSA-190828	Gap junction trafficking	2	49	0.00439659	0.0684336	0.23676	6	20	0.00169549	3.67	9606	Homo sapiens	P50570;Q13509	P50570;Q13509	R-HSA-196017;R-HSA-190519;R-HSA-190520;R-HSA-191737;R-HSA-190829;R-HSA-190877
R-HSA-437239	Recycling pathway of L1	2	49	0.00439659	0.0684336	0.23676	3	14	0.00118684	3.67	9606	Homo sapiens	P50570;Q13509	P50570;Q13509	R-HSA-555065;R-HSA-445077;R-HSA-445071
R-HSA-157858	Gap junction trafficking and regulation	2	51	0.00457604	0.0733241	0.23676	6	24	0.00203459	3.67	9606	Homo sapiens	P50570;Q13509	P50570;Q13509	R-HSA-196017;R-HSA-190519;R-HSA-190520;R-HSA-191737;R-HSA-190829;R-HSA-190877
R-HSA-432722	Golgi Associated Vesicle Biogenesis	2	56	0.00502467	0.0860171	0.23676	3	7	0.000593421	3.63	9606	Homo sapiens	P02792;P50570	P02792;P50570	R-HSA-421831;R-HSA-434362;R-HSA-421835
R-HSA-168643	Nucleotide-binding domain, leucine rich repeat containing receptor (NLR) signaling pathways	2	58	0.00520413	0.0912678	0.23676	9	45	0.00381485	3.765	9606	Homo sapiens	Q00653;Q9Y6K9	Q00653;Q9Y6K9	R-HSA-741386;R-HSA-688136;R-HSA-688985;R-HSA-688137;R-HSA-9603905;R-HSA-706479;R-HSA-622415;R-HSA-741411;R-HSA-168184
R-HSA-8873719	RAB geranylgeranylation	2	65	0.00583221	0.110339	0.23676	2	5	0.000423872	4.16	9606	Homo sapiens	P20339;Q9NRW1	P20339;Q9NRW1	R-HSA-8870469;R-HSA-8870466
R-HSA-1445148	Translocation of SLC2A4 (GLUT4) to the plasma membrane	2	72	0.0064603	0.130344	0.23676	4	15	0.00127162	4.245	9606	Homo sapiens	O60343;Q13509	O60343;Q13509	R-HSA-1445143;R-HSA-2316347;R-HSA-1445149;R-HSA-1445144
R-HSA-199992	trans-Golgi Network Vesicle Budding	2	74	0.00663975	0.136207	0.23676	5	19	0.00161072	3.63	9606	Homo sapiens	P02792;P50570	P02792;P50570	R-HSA-421831;R-HSA-432706;R-HSA-432707;R-HSA-434362;R-HSA-421835
R-HSA-168928	DDX58/IFIH1-mediated induction of interferon-alpha/beta	2	77	0.00690893	0.145109	0.23676	4	46	0.00389963	3.765	9606	Homo sapiens	Q00653;Q9Y6K9	Q00653;Q9Y6K9	R-HSA-933530;R-HSA-168166;R-HSA-933539;R-HSA-168140
R-HSA-8852276	The role of GTSE1 in G2/M progression after G2 checkpoint	2	79	0.00708838	0.15111	0.23676	10	10	0.000847745	4.5	9606	Homo sapiens	Q13509;Q9NYZ3	Q13509;Q9NYZ3	R-HSA-8852324;R-HSA-8852306;R-HSA-8852354;R-HSA-8852337;R-HSA-8852351;R-HSA-8852317;R-HSA-8852331;R-HSA-8852362;R-HSA-8852298;R-HSA-8852280
R-HSA-6806834	Signaling by MET	2	79	0.00708838	0.15111	0.23676	7	49	0.00415395	3.945	9606	Homo sapiens	Q6VN20;P22681	Q6VN20;P22681	R-HSA-8851859;R-HSA-8875490;R-HSA-8875183;R-HSA-8874685;R-HSA-8875451;R-HSA-8851866;R-HSA-8875482
R-HSA-1169408	ISG15 antiviral mechanism	2	80	0.00717811	0.154129	0.23676	2	16	0.00135639	7.12	9606	Homo sapiens	Q04637;O75369	Q04637;O75369	R-HSA-1678842;R-HSA-1169398
R-HSA-975871	MyD88 cascade initiated on plasma membrane	2	85	0.00762674	0.169394	0.23676	10	58	0.00491692	3.765	9606	Homo sapiens	Q00653;Q9Y6K9	Q00653;Q9Y6K9	R-HSA-5609665;R-HSA-168166;R-HSA-5684275;R-HSA-937032;R-HSA-450337;R-HSA-9630923;R-HSA-168184;R-HSA-450346;R-HSA-5684267;R-HSA-168140
R-HSA-168176	Toll Like Receptor 5 (TLR5) Cascade	2	85	0.00762674	0.169394	0.23676	10	59	0.0050017	3.765	9606	Homo sapiens	Q00653;Q9Y6K9	Q00653;Q9Y6K9	R-HSA-5609665;R-HSA-168166;R-HSA-5684275;R-HSA-937032;R-HSA-450337;R-HSA-9630923;R-HSA-168184;R-HSA-450346;R-HSA-5684267;R-HSA-168140
R-HSA-168142	Toll Like Receptor 10 (TLR10) Cascade	2	85	0.00762674	0.169394	0.23676	10	59	0.0050017	3.765	9606	Homo sapiens	Q00653;Q9Y6K9	Q00653;Q9Y6K9	R-HSA-5609665;R-HSA-168166;R-HSA-5684275;R-HSA-937032;R-HSA-450337;R-HSA-9630923;R-HSA-168184;R-HSA-450346;R-HSA-5684267;R-HSA-168140
R-HSA-1169410	Antiviral mechanism by IFN-stimulated genes	2	89	0.00798564	0.181785	0.23676	2	31	0.00262801	7.12	9606	Homo sapiens	Q04637;O75369	Q04637;O75369	R-HSA-1678842;R-HSA-1169398
R-HSA-975138	TRAF6 mediated induction of NFkB and MAP kinases upon TLR7/8 or 9 activation	2	90	0.00807537	0.184904	0.23676	10	48	0.00406918	3.765	9606	Homo sapiens	Q00653;Q9Y6K9	Q00653;Q9Y6K9	R-HSA-975119;R-HSA-5609665;R-HSA-168166;R-HSA-5684275;R-HSA-450337;R-HSA-9630923;R-HSA-168184;R-HSA-450346;R-HSA-5684267;R-HSA-168140
R-HSA-975155	MyD88 dependent cascade initiated on endosome	2	91	0.0081651	0.188031	0.23676	10	63	0.00534079	3.765	9606	Homo sapiens	Q00653;Q9Y6K9	Q00653;Q9Y6K9	R-HSA-975119;R-HSA-5609665;R-HSA-168166;R-HSA-5684275;R-HSA-450337;R-HSA-9630923;R-HSA-168184;R-HSA-450346;R-HSA-5684267;R-HSA-168140
R-HSA-168181	Toll Like Receptor 7/8 (TLR7/8) Cascade	2	91	0.0081651	0.188031	0.23676	10	64	0.00542557	3.765	9606	Homo sapiens	Q00653;Q9Y6K9	Q00653;Q9Y6K9	R-HSA-975119;R-HSA-5609665;R-HSA-168166;R-HSA-5684275;R-HSA-450337;R-HSA-9630923;R-HSA-168184;R-HSA-450346;R-HSA-5684267;R-HSA-168140
R-HSA-1632852	Macroautophagy	2	92	0.00825482	0.191166	0.23676	15	54	0.00457782	5.225	9606	Homo sapiens	Q13501;Q8TDY2	Q13501;Q8TDY2	R-HSA-1632857;R-HSA-5683925;R-HSA-5205673;R-HSA-5672817;R-HSA-5675868;R-HSA-5205663;R-HSA-5679239;R-HSA-5679205;R-HSA-5675790;R-HSA-5665868;R-HSA-5672010;R-HSA-5672011;R-HSA-5672008;R-HSA-5673768;R-HSA-5205649
R-HSA-168164	Toll Like Receptor 3 (TLR3) Cascade	2	93	0.00834455	0.194307	0.23676	10	61	0.00517124	3.765	9606	Homo sapiens	Q00653;Q9Y6K9	Q00653;Q9Y6K9	R-HSA-5609665;R-HSA-168166;R-HSA-5684275;R-HSA-450337;R-HSA-9630923;R-HSA-168184;R-HSA-450346;R-HSA-5684267;R-HSA-9014343;R-HSA-168140
R-HSA-141444	Amplification of signal from unattached kinetochores via a MAD2 inhibitory signal	2	94	0.00843428	0.197456	0.23676	4	4	0.000339098	4.295	9606	Homo sapiens	P30622;Q96EA4	P30622;Q96EA4	R-HSA-141409;R-HSA-141431;R-HSA-141422;R-HSA-141439
R-HSA-141424	Amplification of signal from the kinetochores	2	94	0.00843428	0.197456	0.23676	4	4	0.000339098	4.295	9606	Homo sapiens	P30622;Q96EA4	P30622;Q96EA4	R-HSA-141409;R-HSA-141431;R-HSA-141422;R-HSA-141439
R-HSA-168138	Toll Like Receptor 9 (TLR9) Cascade	2	95	0.008524	0.200611	0.23676	10	67	0.00567989	3.765	9606	Homo sapiens	Q00653;Q9Y6K9	Q00653;Q9Y6K9	R-HSA-975119;R-HSA-5609665;R-HSA-168166;R-HSA-5684275;R-HSA-450337;R-HSA-9630923;R-HSA-168184;R-HSA-450346;R-HSA-5684267;R-HSA-168140
R-HSA-390466	Chaperonin-mediated protein folding	2	96	0.00861373	0.203772	0.23676	10	19	0.00161072	4.895	9606	Homo sapiens	Q13509;Q13371	Q13509;Q13371	R-HSA-8850534;R-HSA-6814418;R-HSA-8850560;R-HSA-389970;R-HSA-389954;R-HSA-8850527;R-HSA-389980;R-HSA-389961;R-HSA-6814121;R-HSA-6814409
R-HSA-166058	MyD88:MAL(TIRAP) cascade initiated on plasma membrane	2	96	0.00861373	0.203772	0.23676	10	64	0.00542557	3.765	9606	Homo sapiens	Q00653;Q9Y6K9	Q00653;Q9Y6K9	R-HSA-5609665;R-HSA-168166;R-HSA-5684275;R-HSA-937032;R-HSA-450337;R-HSA-9630923;R-HSA-168184;R-HSA-450346;R-HSA-5684267;R-HSA-168140
R-HSA-168188	Toll Like Receptor TLR6:TLR2 Cascade	2	96	0.00861373	0.203772	0.23676	10	66	0.00559512	3.765	9606	Homo sapiens	Q00653;Q9Y6K9	Q00653;Q9Y6K9	R-HSA-5609665;R-HSA-168166;R-HSA-5684275;R-HSA-937032;R-HSA-450337;R-HSA-9630923;R-HSA-168184;R-HSA-450346;R-HSA-5684267;R-HSA-168140
R-HSA-1592230	Mitochondrial biogenesis	2	96	0.00861373	0.203772	0.23676	5	36	0.00305188	5.48	9606	Homo sapiens	P51610;Q16891	P51610;Q16891	R-HSA-1592232;R-HSA-8949609;R-HSA-1592250;R-HSA-1592252;R-HSA-2466367
R-HSA-937061	TRIF(TICAM1)-mediated TLR4 signaling	2	97	0.00870345	0.206939	0.23676	10	58	0.00491692	3.765	9606	Homo sapiens	Q00653;Q9Y6K9	Q00653;Q9Y6K9	R-HSA-5609665;R-HSA-168166;R-HSA-5684275;R-HSA-450337;R-HSA-9630923;R-HSA-168184;R-HSA-937029;R-HSA-450346;R-HSA-5684267;R-HSA-168140
R-HSA-166166	MyD88-independent TLR4 cascade	2	97	0.00870345	0.206939	0.23676	10	60	0.00508647	3.765	9606	Homo sapiens	Q00653;Q9Y6K9	Q00653;Q9Y6K9	R-HSA-5609665;R-HSA-168166;R-HSA-5684275;R-HSA-450337;R-HSA-9630923;R-HSA-168184;R-HSA-937029;R-HSA-450346;R-HSA-5684267;R-HSA-168140
R-HSA-5607764	CLEC7A (Dectin-1) signaling	2	98	0.00879318	0.210111	0.23676	10	45	0.00381485	3.765	9606	Homo sapiens	Q00653;Q9Y6K9	Q00653;Q9Y6K9	R-HSA-5660965;R-HSA-202534;R-HSA-5607731;R-HSA-5607725;R-HSA-5607741;R-HSA-5607742;R-HSA-5607726;R-HSA-5607720;R-HSA-202541;R-HSA-5607723
R-HSA-168179	Toll Like Receptor TLR1:TLR2 Cascade	2	99	0.00888291	0.213288	0.23676	10	66	0.00559512	3.765	9606	Homo sapiens	Q00653;Q9Y6K9	Q00653;Q9Y6K9	R-HSA-5609665;R-HSA-168166;R-HSA-5684275;R-HSA-937032;R-HSA-450337;R-HSA-9630923;R-HSA-168184;R-HSA-450346;R-HSA-5684267;R-HSA-168140
R-HSA-181438	Toll Like Receptor 2 (TLR2) Cascade	2	99	0.00888291	0.213288	0.23676	10	68	0.00576467	3.765	9606	Homo sapiens	Q00653;Q9Y6K9	Q00653;Q9Y6K9	R-HSA-5609665;R-HSA-168166;R-HSA-5684275;R-HSA-937032;R-HSA-450337;R-HSA-9630923;R-HSA-168184;R-HSA-450346;R-HSA-5684267;R-HSA-168140
R-HSA-391251	Protein folding	2	102	0.00915209	0.222847	0.23676	16	28	0.00237369	4.895	9606	Homo sapiens	Q13509;Q13371	Q13509;Q13371	R-HSA-8850534;R-HSA-389956;R-HSA-389955;R-HSA-8850560;R-HSA-389954;R-HSA-389964;R-HSA-389961;R-HSA-6814121;R-HSA-6814409;R-HSA-389974;R-HSA-389969;R-HSA-6814418;R-HSA-389970;R-HSA-8850527;R-HSA-389980;R-HSA-389976
R-HSA-9006936	Signaling by TGF-beta family members	2	102	0.00915209	0.222847	0.23676	5	107	0.00907087	3.995	9606	Homo sapiens	P22681;Q7Z3T8	P22681;Q7Z3T8	R-HSA-201648;R-HSA-201476;R-HSA-4332235;R-HSA-201453;R-HSA-4332236
R-HSA-69618	Mitotic Spindle Checkpoint	2	110	0.0098699	0.248486	0.248486	4	7	0.000593421	4.295	9606	Homo sapiens	P30622;Q96EA4	P30622;Q96EA4	R-HSA-141409;R-HSA-141431;R-HSA-141422;R-HSA-141439
R-HSA-68875	Mitotic Prophase	2	119	0.0106774	0.277443	0.277443	10	34	0.00288233	4.43	9606	Homo sapiens	Q08379;Q8TD19	Q08379;Q8TD19	R-HSA-2984220;R-HSA-2172194;R-HSA-2314566;R-HSA-2172183;R-HSA-2314569;R-HSA-2980720;R-HSA-2990880;R-HSA-2214351;R-HSA-2984226;R-HSA-2984258
R-HSA-114608	Platelet degranulation	2	128	0.011485	0.306347	0.306347	2	11	0.000932519	6.925	9606	Homo sapiens	O43852;P12814	O43852;P12814	R-HSA-481007;R-HSA-350745
R-HSA-2173782	Binding and Uptake of Ligands by Scavenger Receptors	2	129	0.0115747	0.309548	0.309548	4	33	0.00279756	5.86	9606	Homo sapiens	P02792;Q07954	P02792;Q07954	R-HSA-2168897;R-HSA-2187266;R-HSA-2230983;R-HSA-2299677
R-HSA-76005	Response to elevated platelet cytosolic Ca2+	2	133	0.0119336	0.322323	0.322323	2	14	0.00118684	6.925	9606	Homo sapiens	O43852;P12814	O43852;P12814	R-HSA-481007;R-HSA-350745
R-HSA-5621481	C-type lectin receptors (CLRs)	2	173	0.0155227	0.4454	0.4454	10	68	0.00576467	3.765	9606	Homo sapiens	Q00653;Q9Y6K9	Q00653;Q9Y6K9	R-HSA-5660965;R-HSA-202534;R-HSA-5607731;R-HSA-5607725;R-HSA-5607741;R-HSA-5607742;R-HSA-5607726;R-HSA-5607720;R-HSA-202541;R-HSA-5607723
R-HSA-5617833	Cilium Assembly	2	202	0.0181247	0.526681	0.526681	13	50	0.00423872	3.685	9606	Homo sapiens	Q8IW35;Q13509	Q8IW35;Q13509	R-HSA-5624949;R-HSA-5626228;R-HSA-5625424;R-HSA-5626227;R-HSA-5625426;R-HSA-5624952;R-HSA-5618328;R-HSA-5618331;R-HSA-5625421;R-HSA-5626220;R-HSA-5626223;R-HSA-5625416;R-HSA-5626699
R-HSA-5689880	Ub-specific processing proteases	2	205	0.0183939	0.534629	0.534629	2	40	0.00339098	3.675	9606	Homo sapiens	Q96RU2;Q9Y6K9	Q96RU2;Q9Y6K9	R-HSA-5696914;R-HSA-5696627
R-HSA-376176	Signaling by ROBO receptors	2	218	0.0195603	0.568021	0.568021	4	59	0.0050017	5.17	9606	Homo sapiens	Q04637;O75044	Q04637;O75044	R-HSA-428533;R-HSA-376145;R-HSA-9014652;R-HSA-9014610
R-HSA-76002	Platelet activation, signaling and aggregation	2	262	0.0235083	0.668127	0.668127	2	114	0.00966429	6.925	9606	Homo sapiens	O43852;P12814	O43852;P12814	R-HSA-481007;R-HSA-350745
R-HSA-112315	Transmission across Chemical Synapses	2	273	0.0244953	0.690069	0.690069	4	153	0.0129705	3.695	9606	Homo sapiens	Q13509;P51649	Q13509;P51649	R-HSA-9610627;R-HSA-9619542;R-HSA-888548;R-HSA-9610408
R-HSA-913531	Interferon Signaling	2	289	0.0259309	0.719867	0.719867	2	66	0.00559512	7.12	9606	Homo sapiens	Q04637;O75369	Q04637;O75369	R-HSA-1678842;R-HSA-1169398
R-HSA-1474244	Extracellular matrix organization	2	301	0.0270076	0.740623	0.740623	2	318	0.0269583	7.57	9606	Homo sapiens	P20810;P12814	P20810;P12814	R-HSA-2731149;R-HSA-8848658
R-HSA-983168	Antigen processing: Ubiquitination & Proteasome degradation	2	309	0.0277254	0.753729	0.753729	4	9	0.00076297	4.685	9606	Homo sapiens	Q7Z6Z7;Q8NEZ5	Q7Z6Z7;Q8NEZ5	R-HSA-983147;R-HSA-983157;R-HSA-983156;R-HSA-983140
R-HSA-3700989	Transcriptional Regulation by TP53	2	367	0.0329296	0.832814	0.832814	4	258	0.0218718	3.98	9606	Homo sapiens	Q9Y5B0;Q92597	Q9Y5B0;Q92597	R-HSA-6797606;R-HSA-5633314;R-HSA-6797616;R-HSA-6797712
R-HSA-71291	Metabolism of amino acids and derivatives	2	371	0.0332885	0.837331	0.837331	2	244	0.020685	4.005	9606	Homo sapiens	P31327;P23378	P31327;P23378	R-HSA-5693967;R-HSA-70555
R-HSA-5663202	Diseases of signal transduction	2	403	0.0361597	0.869706	0.869706	13	283	0.0239912	3.975	9606	Homo sapiens	P22681;Q32MZ4	P22681;Q32MZ4	R-HSA-1839100;R-HSA-1839039;R-HSA-1839065;R-HSA-1839098;R-HSA-1839094;R-HSA-1839031;R-HSA-1839091;R-HSA-1225949;R-HSA-1839080;R-HSA-5637794;R-HSA-1225956;R-HSA-1839078;R-HSA-1225960
R-HSA-2262752	Cellular responses to stress	2	408	0.0366083	0.874201	0.874201	6	181	0.0153442	5.165	9606	Homo sapiens	P17066;Q13509	P17066;Q13509	R-HSA-5251955;R-HSA-5618080;R-HSA-5251942;R-HSA-5251959;R-HSA-5252041;R-HSA-5252079
R-HSA-112316	Neuronal System	2	419	0.0375953	0.883598	0.883598	4	206	0.0174635	3.695	9606	Homo sapiens	Q13509;P51649	Q13509;P51649	R-HSA-9610627;R-HSA-9619542;R-HSA-888548;R-HSA-9610408
R-HSA-5663205	Infectious disease	2	463	0.0415433	0.915101	0.915101	30	321	0.0272126	3.705	9606	Homo sapiens	P22681;Q9Y5B0	P22681;Q9Y5B0	R-HSA-167181;R-HSA-170706;R-HSA-8876246;R-HSA-170704;R-HSA-167191;R-HSA-8876240;R-HSA-8876255;R-HSA-167192;R-HSA-167196;R-HSA-167197;R-HSA-167459;R-HSA-8876262;R-HSA-167072;R-HSA-8876258;R-HSA-167076;R-HSA-167077;R-HSA-167147;R-HSA-167083;R-HSA-167150;R-HSA-167087;R-HSA-167148;R-HSA-167084;R-HSA-167085;R-HSA-167090;R-HSA-167282;R-HSA-167478;R-HSA-167284;R-HSA-167288;R-HSA-167481;R-HSA-167292
R-HSA-556833	Metabolism of lipids	2	746	0.0669358	0.9904	0.9904	2	812	0.0688369	4.33	9606	Homo sapiens	P20339;P05165	P20339;P05165	R-HSA-8871366;R-HSA-71031
R-HSA-916853	Degradation of GABA	1	2	0.000179453	0.0172578	0.23676	1	2	0.000169549	3.82	9606	Homo sapiens	P51649	P51649	R-HSA-888548
R-HSA-5602636	IKBKB deficiency causes SCID	1	3	0.000269179	0.0257759	0.23676	1	1	8.47745e-05	3.85	9606	Homo sapiens	Q9Y6K9	Q9Y6K9	R-HSA-5228840
R-HSA-5603027	IKBKG deficiency causes anhidrotic ectodermal dysplasia with immunodeficiency (EDA-ID) (via TLR)	1	3	0.000269179	0.0257759	0.23676	1	1	8.47745e-05	3.85	9606	Homo sapiens	Q9Y6K9	Q9Y6K9	R-HSA-5262921
R-HSA-6783984	Glycine degradation	1	4	0.000358905	0.0342208	0.23676	1	3	0.000254323	4.62	9606	Homo sapiens	P23378	P23378	R-HSA-5693967
R-HSA-203641	NOSTRIN mediated eNOS trafficking	1	5	0.000448632	0.0425933	0.23676	3	4	0.000339098	3.77	9606	Homo sapiens	P50570	P50570	R-HSA-203625;R-HSA-203662;R-HSA-203565
R-HSA-3134973	LRR FLII-interacting protein 1 (LRRFIP1) activates type I IFN production	1	5	0.000448632	0.0425933	0.23676	3	5	0.000423872	4.37	9606	Homo sapiens	Q32MZ4	Q32MZ4	R-HSA-3134904;R-HSA-3134901;R-HSA-3134896
R-HSA-71032	Propionyl-CoA catabolism	1	5	0.000448632	0.0425933	0.23676	1	3	0.000254323	4.84	9606	Homo sapiens	P05165	P05165	R-HSA-71031
R-HSA-5676934	Protein repair	1	6	0.000538358	0.050894	0.23676	1	3	0.000254323	3.33	9606	Homo sapiens	P22061	P22061	R-HSA-5676966
R-HSA-2980767	Activation of NIMA Kinases NEK9, NEK6, NEK7	1	7	0.000628084	0.0591234	0.23676	4	4	0.000339098	4.8	9606	Homo sapiens	Q8TD19	Q8TD19	R-HSA-2984220;R-HSA-2980720;R-HSA-2984226;R-HSA-2984258
R-HSA-3371599	Defective HLCS causes multiple carboxylase deficiency	1	7	0.000628084	0.0591234	0.23676	1	4	0.000339098	4.84	9606	Homo sapiens	P05165	P05165	R-HSA-9035990
R-HSA-3134963	DEx/H-box helicases activate type I IFN and inflammatory cytokines production	1	7	0.000628084	0.0591234	0.23676	1	5	0.000423872	3.68	9606	Homo sapiens	Q00653	Q00653	R-HSA-9604480
R-HSA-428543	Inactivation of CDC42 and RAC1	1	8	0.000717811	0.0672822	0.23676	2	4	0.000339098	4.44	9606	Homo sapiens	O75044	O75044	R-HSA-428533;R-HSA-376145
R-HSA-448706	Interleukin-1 processing	1	8	0.000717811	0.0672822	0.23676	1	5	0.000423872	3.68	9606	Homo sapiens	Q00653	Q00653	R-HSA-448703
R-HSA-446388	Regulation of cytoskeletal remodeling and cell spreading by IPP complex components	1	8	0.000717811	0.0672822	0.23676	1	5	0.000423872	9.87	9606	Homo sapiens	P12814	P12814	R-HSA-430308
R-HSA-3323169	Defects in biotin (Btn) metabolism	1	8	0.000717811	0.0672822	0.23676	1	6	0.000508647	4.84	9606	Homo sapiens	P05165	P05165	R-HSA-9035990
R-HSA-947581	Molybdenum cofactor biosynthesis	1	8	0.000717811	0.0672822	0.23676	1	6	0.000508647	5.36	9606	Homo sapiens	Q9NQX3	Q9NQX3	R-HSA-947531
R-HSA-8849469	PTK6 Regulates RTKs and Their Effectors AKT1 and DOK1	1	9	0.000807537	0.075371	0.23676	2	8	0.000678196	3.58	9606	Homo sapiens	P22681	P22681	R-HSA-8848818;R-HSA-8848829
R-HSA-70635	Urea cycle	1	10	0.000897263	0.0833904	0.23676	1	8	0.000678196	3.39	9606	Homo sapiens	P31327	P31327	R-HSA-70555
R-HSA-196025	Formation of annular gap junctions	1	11	0.00098699	0.0913409	0.23676	1	2	0.000169549	3.77	9606	Homo sapiens	P50570	P50570	R-HSA-196017
R-HSA-196780	Biotin transport and metabolism	1	11	0.00098699	0.0913409	0.23676	3	12	0.00101729	4.84	9606	Homo sapiens	P05165	P05165	R-HSA-3323111;R-HSA-3065959;R-HSA-2993447
R-HSA-8851805	MET activates RAS signaling	1	11	0.00098699	0.0913409	0.23676	2	10	0.000847745	4.31	9606	Homo sapiens	Q6VN20	Q6VN20	R-HSA-8851859;R-HSA-8851866
R-HSA-190873	Gap junction degradation	1	12	0.00107672	0.0992231	0.23676	3	4	0.000339098	3.77	9606	Homo sapiens	P50570	P50570	R-HSA-196017;R-HSA-190519;R-HSA-190829
R-HSA-933543	NF-kB activation through FADD/RIP-1 pathway mediated by caspase-8 and -10	1	12	0.00107672	0.0992231	0.23676	1	5	0.000423872	3.85	9606	Homo sapiens	Q9Y6K9	Q9Y6K9	R-HSA-933539
R-HSA-264870	Caspase-mediated cleavage of cytoskeletal proteins	1	12	0.00107672	0.0992231	0.23676	1	10	0.000847745	5.36	9606	Homo sapiens	Q13813	Q13813	R-HSA-202967
R-HSA-209560	NF-kB is activated and signals survival	1	13	0.00116644	0.107038	0.23676	2	4	0.000339098	3.83	9606	Homo sapiens	Q13501	Q13501	R-HSA-193703;R-HSA-193705
R-HSA-162658	Golgi Cisternae Pericentriolar Stack Reorganization	1	14	0.00125617	0.114785	0.23676	5	6	0.000508647	4.06	9606	Homo sapiens	Q08379	Q08379	R-HSA-2172194;R-HSA-2314566;R-HSA-2172183;R-HSA-2314569;R-HSA-2214351
R-HSA-209543	p75NTR recruits signalling complexes	1	14	0.00125617	0.114785	0.23676	4	9	0.00076297	3.83	9606	Homo sapiens	Q13501	Q13501	R-HSA-193684;R-HSA-193641;R-HSA-193694;R-HSA-209566
R-HSA-177504	Retrograde neurotrophin signalling	1	14	0.00125617	0.114785	0.23676	1	3	0.000254323	3.77	9606	Homo sapiens	P50570	P50570	R-HSA-177501
R-HSA-937039	IRAK1 recruits IKK complex	1	14	0.00125617	0.114785	0.23676	1	4	0.000339098	3.85	9606	Homo sapiens	Q9Y6K9	Q9Y6K9	R-HSA-937032
R-HSA-975144	IRAK1 recruits IKK complex upon TLR7/8 or 9 stimulation	1	14	0.00125617	0.114785	0.23676	1	4	0.000339098	3.85	9606	Homo sapiens	Q9Y6K9	Q9Y6K9	R-HSA-975119
R-HSA-6803205	TP53 regulates transcription of several additional cell death genes whose specific roles in p53-dependent apoptosis remain uncertain	1	14	0.00125617	0.114785	0.23676	1	18	0.00152594	4.13	9606	Homo sapiens	Q92597	Q92597	R-HSA-5633314
R-HSA-202131	Metabolism of nitric oxide: eNOS activation and regulation	1	15	0.0013459	0.122466	0.23676	3	25	0.00211936	3.77	9606	Homo sapiens	P50570	P50570	R-HSA-203625;R-HSA-203662;R-HSA-203565
R-HSA-5637810	Constitutive Signaling by EGFRvIII	1	15	0.0013459	0.122466	0.23676	1	18	0.00152594	3.58	9606	Homo sapiens	P22681	P22681	R-HSA-5637794
R-HSA-5637812	Signaling by EGFRvIII in Cancer	1	15	0.0013459	0.122466	0.23676	1	18	0.00152594	3.58	9606	Homo sapiens	P22681	P22681	R-HSA-5637794
R-HSA-1059683	Interleukin-6 signaling	1	15	0.0013459	0.122466	0.23676	1	19	0.00161072	3.58	9606	Homo sapiens	P22681	P22681	R-HSA-1112690
R-HSA-205043	NRIF signals cell death from the nucleus	1	16	0.00143562	0.130081	0.23676	2	7	0.000593421	3.83	9606	Homo sapiens	Q13501	Q13501	R-HSA-204947;R-HSA-205008
R-HSA-1295596	Spry regulation of FGF signaling	1	16	0.00143562	0.130081	0.23676	3	11	0.000932519	3.58	9606	Homo sapiens	P22681	P22681	R-HSA-934604;R-HSA-1295622;R-HSA-1295621
R-HSA-5684264	MAP3K8 (TPL2)-dependent MAPK1/3 activation	1	16	0.00143562	0.130081	0.23676	2	8	0.000678196	3.85	9606	Homo sapiens	Q9Y6K9	Q9Y6K9	R-HSA-5684275;R-HSA-5684267
R-HSA-1433559	Regulation of KIT signaling	1	16	0.00143562	0.130081	0.23676	1	8	0.000678196	3.58	9606	Homo sapiens	P22681	P22681	R-HSA-205244
R-HSA-844456	The NLRP3 inflammasome	1	16	0.00143562	0.130081	0.23676	1	18	0.00152594	3.68	9606	Homo sapiens	Q00653	Q00653	R-HSA-9603905
R-HSA-8875360	InlB-mediated entry of Listeria monocytogenes into host cell	1	17	0.00152535	0.137631	0.23676	5	8	0.000678196	3.58	9606	Homo sapiens	P22681	P22681	R-HSA-8876262;R-HSA-8876246;R-HSA-8876258;R-HSA-8876240;R-HSA-8876255
R-HSA-193639	p75NTR signals via NF-kB	1	17	0.00152535	0.137631	0.23676	6	13	0.00110207	3.83	9606	Homo sapiens	Q13501	Q13501	R-HSA-193703;R-HSA-193684;R-HSA-193641;R-HSA-193705;R-HSA-193694;R-HSA-209566
R-HSA-1839117	Signaling by cytosolic FGFR1 fusion mutants	1	18	0.00161507	0.145115	0.23676	6	14	0.00118684	4.37	9606	Homo sapiens	Q32MZ4	Q32MZ4	R-HSA-1839039;R-HSA-1839080;R-HSA-1839065;R-HSA-1839078;R-HSA-1839031;R-HSA-1839091
R-HSA-196757	Metabolism of folate and pterines	1	18	0.00161507	0.145115	0.23676	1	28	0.00237369	4.6	9606	Homo sapiens	Q3SY69	Q3SY69	R-HSA-6808487
R-HSA-168927	TICAM1, RIP1-mediated IKK complex recruitment	1	19	0.0017048	0.152536	0.23676	1	3	0.000254323	3.85	9606	Homo sapiens	Q9Y6K9	Q9Y6K9	R-HSA-9014343
R-HSA-3000480	Scavenging by Class A Receptors	1	19	0.0017048	0.152536	0.23676	2	10	0.000847745	3.49	9606	Homo sapiens	P02792	P02792	R-HSA-2187266;R-HSA-2299677
R-HSA-5637815	Signaling by Ligand-Responsive EGFR Variants in Cancer	1	19	0.0017048	0.152536	0.23676	3	23	0.00194981	3.58	9606	Homo sapiens	P22681	P22681	R-HSA-1225956;R-HSA-1225960;R-HSA-1225949
R-HSA-1236382	Constitutive Signaling by Ligand-Responsive EGFR Cancer Variants	1	19	0.0017048	0.152536	0.23676	3	23	0.00194981	3.58	9606	Homo sapiens	P22681	P22681	R-HSA-1225956;R-HSA-1225960;R-HSA-1225949
R-HSA-888590	GABA synthesis, release, reuptake and degradation	1	19	0.0017048	0.152536	0.23676	1	9	0.00076297	3.82	9606	Homo sapiens	P51649	P51649	R-HSA-888548
R-HSA-190840	Microtubule-dependent trafficking of connexons from Golgi to the plasma membrane	1	20	0.00179453	0.159893	0.23676	1	2	0.000169549	3.57	9606	Homo sapiens	Q13509	Q13509	R-HSA-190520
R-HSA-6807004	Negative regulation of MET activity	1	21	0.00188425	0.167186	0.23676	5	10	0.000847745	3.58	9606	Homo sapiens	P22681	P22681	R-HSA-8875490;R-HSA-8875183;R-HSA-8874685;R-HSA-8875451;R-HSA-8875482
R-HSA-190872	Transport of connexons to the plasma membrane	1	21	0.00188425	0.167186	0.23676	1	3	0.000254323	3.57	9606	Homo sapiens	Q13509	Q13509	R-HSA-190520
R-HSA-912631	Regulation of signaling by CBL	1	22	0.00197398	0.174417	0.23676	7	7	0.000593421	3.58	9606	Homo sapiens	P22681	P22681	R-HSA-879917;R-HSA-912734;R-HSA-912629;R-HSA-912724;R-HSA-912727;R-HSA-912790;R-HSA-912627
R-HSA-5205685	Pink/Parkin Mediated Mitophagy	1	22	0.00197398	0.174417	0.23676	3	8	0.000678196	3.83	9606	Homo sapiens	Q13501	Q13501	R-HSA-5205663;R-HSA-5205673;R-HSA-5205649
R-HSA-450321	JNK (c-Jun kinases) phosphorylation and activation mediated by activated human TAK1	1	22	0.00197398	0.174417	0.23676	1	3	0.000254323	3.85	9606	Homo sapiens	Q9Y6K9	Q9Y6K9	R-HSA-450337
R-HSA-3296482	Defects in vitamin and cofactor metabolism	1	22	0.00197398	0.174417	0.23676	1	22	0.00186504	4.84	9606	Homo sapiens	P05165	P05165	R-HSA-9035990
R-HSA-167242	Abortive elongation of HIV-1 transcript in the absence of Tat	1	23	0.00206371	0.181585	0.23676	2	2	0.000169549	3.83	9606	Homo sapiens	Q9Y5B0	Q9Y5B0	R-HSA-167147;R-HSA-167087
R-HSA-389977	Post-chaperonin tubulin folding pathway	1	23	0.00206371	0.181585	0.23676	6	9	0.00076297	3.57	9606	Homo sapiens	Q13509	Q13509	R-HSA-389956;R-HSA-389974;R-HSA-389969;R-HSA-389955;R-HSA-389964;R-HSA-389976
R-HSA-8876384	Listeria monocytogenes entry into host cells	1	23	0.00206371	0.181585	0.23676	5	13	0.00110207	3.58	9606	Homo sapiens	P22681	P22681	R-HSA-8876262;R-HSA-8876246;R-HSA-8876258;R-HSA-8876240;R-HSA-8876255
R-HSA-937041	IKK complex recruitment mediated by RIP1	1	23	0.00206371	0.181585	0.23676	1	3	0.000254323	3.85	9606	Homo sapiens	Q9Y6K9	Q9Y6K9	R-HSA-937029
R-HSA-450302	activated TAK1 mediates p38 MAPK activation	1	23	0.00206371	0.181585	0.23676	1	5	0.000423872	3.85	9606	Homo sapiens	Q9Y6K9	Q9Y6K9	R-HSA-450346
R-HSA-166208	mTORC1-mediated signalling	1	23	0.00206371	0.181585	0.23676	1	7	0.000593421	5.9	9606	Homo sapiens	Q04637	Q04637	R-HSA-165766
R-HSA-622312	Inflammasomes	1	24	0.00215343	0.188693	0.23676	1	28	0.00237369	3.68	9606	Homo sapiens	Q00653	Q00653	R-HSA-9603905
R-HSA-429947	Deadenylation of mRNA	1	25	0.00224316	0.195738	0.23676	4	4	0.000339098	5.9	9606	Homo sapiens	Q04637	Q04637	R-HSA-430021;R-HSA-429955;R-HSA-8941312;R-HSA-429992
R-HSA-1643713	Signaling by EGFR in Cancer	1	25	0.00224316	0.195738	0.23676	4	42	0.00356053	3.58	9606	Homo sapiens	P22681	P22681	R-HSA-5637794;R-HSA-1225956;R-HSA-1225960;R-HSA-1225949
R-HSA-9013507	NOTCH3 Activation and Transmission of Signal to the Nucleus	1	25	0.00224316	0.195738	0.23676	1	15	0.00127162	5.96	9606	Homo sapiens	Q9Y6A5	Q9Y6A5	R-HSA-9017855
R-HSA-389960	Formation of tubulin folding intermediates by CCT/TriC	1	26	0.00233288	0.202724	0.23676	2	2	0.000169549	3.57	9606	Homo sapiens	Q13509	Q13509	R-HSA-389954;R-HSA-389961
R-HSA-3214842	HDMs demethylate histones	1	26	0.00233288	0.202724	0.23676	2	17	0.00144117	4.02	9606	Homo sapiens	P41229	P41229	R-HSA-5661116;R-HSA-4754181
R-HSA-3000170	Syndecan interactions	1	27	0.00242261	0.209649	0.23676	1	15	0.00127162	9.87	9606	Homo sapiens	P12814	P12814	R-HSA-2731149
R-HSA-389957	Prefoldin mediated transfer of substrate to CCT/TriC	1	28	0.00251234	0.216515	0.23676	2	2	0.000169549	3.57	9606	Homo sapiens	Q13509	Q13509	R-HSA-389970;R-HSA-389980
R-HSA-201451	Signaling by BMP	1	28	0.00251234	0.216515	0.23676	3	17	0.00144117	4.41	9606	Homo sapiens	Q7Z3T8	Q7Z3T8	R-HSA-201648;R-HSA-201476;R-HSA-201453
R-HSA-6783589	Interleukin-6 family signaling	1	28	0.00251234	0.216515	0.23676	1	33	0.00279756	3.58	9606	Homo sapiens	P22681	P22681	R-HSA-1112690
R-HSA-9619483	Activation of AMPK downstream of NMDARs	1	29	0.00260206	0.223322	0.23676	1	3	0.000254323	3.57	9606	Homo sapiens	Q13509	Q13509	R-HSA-9619542
R-HSA-5205647	Mitophagy	1	29	0.00260206	0.223322	0.23676	3	15	0.00127162	3.83	9606	Homo sapiens	Q13501	Q13501	R-HSA-5205663;R-HSA-5205673;R-HSA-5205649
R-HSA-5654732	Negative regulation of FGFR3 signaling	1	30	0.00269179	0.23007	0.23676	5	14	0.00118684	3.58	9606	Homo sapiens	P22681	P22681	R-HSA-5654679;R-HSA-934604;R-HSA-1295622;R-HSA-1295621;R-HSA-5654730
R-HSA-182971	EGFR downregulation	1	31	0.00278152	0.23676	0.23676	21	22	0.00186504	3.58	9606	Homo sapiens	P22681	P22681	R-HSA-8867047;R-HSA-183072;R-HSA-8867044;R-HSA-8867041;R-HSA-182986;R-HSA-183051;R-HSA-8951490;R-HSA-182990;R-HSA-183055;R-HSA-183084;R-HSA-183052;R-HSA-182988;R-HSA-183058;R-HSA-182994;R-HSA-183089;R-HSA-182993;R-HSA-183094;R-HSA-183002;R-HSA-183067;R-HSA-182969;R-HSA-183036
R-HSA-445095	Interaction between L1 and Ankyrins	1	31	0.00278152	0.23676	0.23676	2	4	0.000339098	5.36	9606	Homo sapiens	Q13813	Q13813	R-HSA-392751;R-HSA-373739
R-HSA-8949613	Cristae formation	1	31	0.00278152	0.23676	0.23676	1	2	0.000169549	6.85	9606	Homo sapiens	Q16891	Q16891	R-HSA-8949609
R-HSA-5654733	Negative regulation of FGFR4 signaling	1	31	0.00278152	0.23676	0.23676	5	14	0.00118684	3.58	9606	Homo sapiens	P22681	P22681	R-HSA-934604;R-HSA-1295622;R-HSA-1295621;R-HSA-5654734;R-HSA-5654684
R-HSA-389661	Glyoxylate metabolism and glycine degradation	1	31	0.00278152	0.23676	0.23676	1	19	0.00161072	4.62	9606	Homo sapiens	P23378	P23378	R-HSA-5693967
R-HSA-2173789	TGF-beta receptor signaling activates SMADs	1	32	0.00287124	0.243393	0.243393	2	39	0.00330621	3.58	9606	Homo sapiens	P22681	P22681	R-HSA-4332235;R-HSA-4332236
R-HSA-113418	Formation of the Early Elongation Complex	1	33	0.00296097	0.249968	0.249968	3	3	0.000254323	3.83	9606	Homo sapiens	Q9Y5B0	Q9Y5B0	R-HSA-113402;R-HSA-113407;R-HSA-112383
R-HSA-167158	Formation of the HIV-1 Early Elongation Complex	1	33	0.00296097	0.249968	0.249968	4	5	0.000423872	3.83	9606	Homo sapiens	Q9Y5B0	Q9Y5B0	R-HSA-167072;R-HSA-167478;R-HSA-167083;R-HSA-167085
R-HSA-389958	Cooperation of Prefoldin and TriC/CCT in actin and tubulin folding	1	33	0.00296097	0.249968	0.249968	4	6	0.000508647	3.57	9606	Homo sapiens	Q13509	Q13509	R-HSA-389970;R-HSA-389954;R-HSA-389980;R-HSA-389961
R-HSA-1839124	FGFR1 mutant receptor activation	1	33	0.00296097	0.249968	0.249968	6	25	0.00211936	4.37	9606	Homo sapiens	Q32MZ4	Q32MZ4	R-HSA-1839039;R-HSA-1839080;R-HSA-1839065;R-HSA-1839078;R-HSA-1839031;R-HSA-1839091
R-HSA-418990	Adherens junctions interactions	1	33	0.00296097	0.249968	0.249968	2	16	0.00135639	4.62	9606	Homo sapiens	P55196	P55196-2	R-HSA-433725;R-HSA-419003
R-HSA-70263	Gluconeogenesis	1	34	0.0030507	0.256488	0.256488	1	25	0.00211936	11.51	9606	Homo sapiens	P06733	P06733	R-HSA-70494
R-HSA-167243	Tat-mediated HIV elongation arrest and recovery	1	35	0.00314042	0.262951	0.262951	3	3	0.000254323	3.83	9606	Homo sapiens	Q9Y5B0	Q9Y5B0	R-HSA-167090;R-HSA-167459;R-HSA-167148
R-HSA-167238	Pausing and recovery of Tat-mediated HIV elongation	1	35	0.00314042	0.262951	0.262951	2	2	0.000169549	3.83	9606	Homo sapiens	Q9Y5B0	Q9Y5B0	R-HSA-167076;R-HSA-167150
R-HSA-168638	NOD1/2 Signaling Pathway	1	35	0.00314042	0.262951	0.262951	8	17	0.00144117	3.85	9606	Homo sapiens	Q9Y6K9	Q9Y6K9	R-HSA-741386;R-HSA-688136;R-HSA-688985;R-HSA-688137;R-HSA-706479;R-HSA-622415;R-HSA-741411;R-HSA-168184
R-HSA-5654726	Negative regulation of FGFR1 signaling	1	35	0.00314042	0.262951	0.262951	5	15	0.00127162	3.58	9606	Homo sapiens	P22681	P22681	R-HSA-934604;R-HSA-1295622;R-HSA-5654672;R-HSA-1295621;R-HSA-5654673
R-HSA-390522	Striated Muscle Contraction	1	36	0.00323015	0.269358	0.269358	4	4	0.000339098	3.68	9606	Homo sapiens	P67936	P67936	R-HSA-390597;R-HSA-390598;R-HSA-390593;R-HSA-390595
R-HSA-167287	HIV elongation arrest and recovery	1	36	0.00323015	0.269358	0.269358	3	3	0.000254323	3.83	9606	Homo sapiens	Q9Y5B0	Q9Y5B0	R-HSA-167284;R-HSA-167288;R-HSA-167481
R-HSA-167290	Pausing and recovery of HIV elongation	1	36	0.00323015	0.269358	0.269358	2	2	0.000169549	3.83	9606	Homo sapiens	Q9Y5B0	Q9Y5B0	R-HSA-167282;R-HSA-167292
R-HSA-5654727	Negative regulation of FGFR2 signaling	1	37	0.00331987	0.27571	0.27571	5	14	0.00118684	3.58	9606	Homo sapiens	P22681	P22681	R-HSA-934604;R-HSA-5654677;R-HSA-1295622;R-HSA-1295621;R-HSA-5654729
R-HSA-432720	Lysosome Vesicle Biogenesis	1	37	0.00331987	0.27571	0.27571	2	8	0.000678196	3.77	9606	Homo sapiens	P50570	P50570	R-HSA-432706;R-HSA-432707
R-HSA-156590	Glutathione conjugation	1	37	0.00331987	0.27571	0.27571	1	12	0.00101729	3.62	9606	Homo sapiens	P28161	P28161	R-HSA-176054
R-HSA-190861	Gap junction assembly	1	38	0.0034096	0.282008	0.282008	3	16	0.00135639	3.57	9606	Homo sapiens	Q13509	Q13509	R-HSA-190520;R-HSA-191737;R-HSA-190877
R-HSA-5689896	Ovarian tumor domain proteases	1	38	0.0034096	0.282008	0.282008	1	14	0.00118684	3.85	9606	Homo sapiens	Q9Y6K9	Q9Y6K9	R-HSA-688136
R-HSA-111465	Apoptotic cleavage of cellular proteins	1	38	0.0034096	0.282008	0.282008	1	38	0.00322143	5.36	9606	Homo sapiens	Q13813	Q13813	R-HSA-202967
R-HSA-77289	Mitochondrial Fatty Acid Beta-Oxidation	1	38	0.0034096	0.282008	0.282008	1	47	0.0039844	4.84	9606	Homo sapiens	P05165	P05165	R-HSA-71031
R-HSA-445355	Smooth Muscle Contraction	1	39	0.00349933	0.288251	0.288251	4	11	0.000932519	3.68	9606	Homo sapiens	P67936	P67936	R-HSA-445700;R-HSA-445699;R-HSA-445704;R-HSA-445705
R-HSA-3301854	Nuclear Pore Complex (NPC) Disassembly	1	40	0.00358905	0.294441	0.294441	1	2	0.000169549	4.8	9606	Homo sapiens	Q8TD19	Q8TD19	R-HSA-2990880
R-HSA-5655302	Signaling by FGFR1 in disease	1	40	0.00358905	0.294441	0.294441	9	35	0.00296711	4.37	9606	Homo sapiens	Q32MZ4	Q32MZ4	R-HSA-1839100;R-HSA-1839039;R-HSA-1839080;R-HSA-1839065;R-HSA-1839098;R-HSA-1839094;R-HSA-1839078;R-HSA-1839031;R-HSA-1839091
R-HSA-165159	mTOR signalling	1	40	0.00358905	0.294441	0.294441	1	28	0.00237369	5.9	9606	Homo sapiens	Q04637	Q04637	R-HSA-165766
R-HSA-6814122	Cooperation of PDCL (PhLP1) and TRiC/CCT in G-protein beta folding	1	42	0.00376851	0.306661	0.306661	6	11	0.000932519	6.22	9606	Homo sapiens	Q13371	Q13371	R-HSA-8850534;R-HSA-6814418;R-HSA-8850560;R-HSA-8850527;R-HSA-6814121;R-HSA-6814409
R-HSA-5654743	Signaling by FGFR4	1	42	0.00376851	0.306661	0.306661	5	41	0.00347575	3.58	9606	Homo sapiens	P22681	P22681	R-HSA-934604;R-HSA-1295622;R-HSA-1295621;R-HSA-5654734;R-HSA-5654684
R-HSA-5654741	Signaling by FGFR3	1	42	0.00376851	0.306661	0.306661	5	43	0.0036453	3.58	9606	Homo sapiens	P22681	P22681	R-HSA-5654679;R-HSA-934604;R-HSA-1295622;R-HSA-1295621;R-HSA-5654730
R-HSA-8955332	Carboxyterminal post-translational modifications of tubulin	1	43	0.00385823	0.312692	0.312692	6	6	0.000508647	3.57	9606	Homo sapiens	Q13509	Q13509	R-HSA-8955706;R-HSA-8955869;R-HSA-8955712;R-HSA-8865774;R-HSA-8867370;R-HSA-8866105
R-HSA-9609736	Assembly and cell surface presentation of NMDA receptors	1	43	0.00385823	0.312692	0.312692	2	22	0.00186504	3.57	9606	Homo sapiens	Q13509	Q13509	R-HSA-9610627;R-HSA-9610408
R-HSA-6782315	tRNA modification in the nucleus and cytosol	1	43	0.00385823	0.312692	0.312692	1	37	0.00313666	3.57	9606	Homo sapiens	Q9UJA5	Q9UJA5	R-HSA-6783492
R-HSA-975634	Retinoid metabolism and transport	1	44	0.00394796	0.318671	0.318671	1	26	0.00220414	8.23	9606	Homo sapiens	Q07954	Q07954	R-HSA-2404131
R-HSA-1433557	Signaling by SCF-KIT	1	44	0.00394796	0.318671	0.318671	1	36	0.00305188	3.58	9606	Homo sapiens	P22681	P22681	R-HSA-205244
R-HSA-5633008	TP53 Regulates Transcription of Cell Death Genes	1	44	0.00394796	0.318671	0.318671	1	67	0.00567989	4.13	9606	Homo sapiens	Q92597	Q92597	R-HSA-5633314
R-HSA-167246	Tat-mediated elongation of the HIV-1 transcript	1	47	0.00421714	0.336302	0.336302	7	8	0.000678196	3.83	9606	Homo sapiens	Q9Y5B0	Q9Y5B0	R-HSA-170706;R-HSA-170704;R-HSA-167191;R-HSA-167192;R-HSA-167196;R-HSA-167197;R-HSA-167181
R-HSA-167169	HIV Transcription Elongation	1	47	0.00421714	0.336302	0.336302	13	15	0.00127162	3.83	9606	Homo sapiens	Q9Y5B0	Q9Y5B0	R-HSA-167072;R-HSA-167147;R-HSA-167083;R-HSA-167087;R-HSA-167181;R-HSA-167085;R-HSA-170706;R-HSA-170704;R-HSA-167478;R-HSA-167191;R-HSA-167192;R-HSA-167196;R-HSA-167197
R-HSA-167200	Formation of HIV-1 elongation complex containing HIV-1 Tat	1	47	0.00421714	0.336302	0.336302	4	5	0.000423872	3.83	9606	Homo sapiens	Q9Y5B0	Q9Y5B0	R-HSA-170706;R-HSA-170704;R-HSA-167191;R-HSA-167196
R-HSA-3214841	PKMTs methylate histone lysines	1	47	0.00421714	0.336302	0.336302	1	22	0.00186504	3.68	9606	Homo sapiens	Q00653	Q00653	R-HSA-8865237
R-HSA-167152	Formation of HIV elongation complex in the absence of HIV Tat	1	48	0.00430686	0.342077	0.342077	2	2	0.000169549	3.83	9606	Homo sapiens	Q9Y5B0	Q9Y5B0	R-HSA-167077;R-HSA-167084
R-HSA-512988	Interleukin-3, Interleukin-5 and GM-CSF signaling	1	48	0.00430686	0.342077	0.342077	7	38	0.00322143	3.58	9606	Homo sapiens	P22681	P22681	R-HSA-879917;R-HSA-912734;R-HSA-912629;R-HSA-912724;R-HSA-912727;R-HSA-912790;R-HSA-912627
R-HSA-6806667	Metabolism of fat-soluble vitamins	1	48	0.00430686	0.342077	0.342077	1	32	0.00271278	8.23	9606	Homo sapiens	Q07954	Q07954	R-HSA-2404131
R-HSA-3214858	RMTs methylate histone arginines	1	49	0.00439659	0.347804	0.347804	5	22	0.00186504	4.19	9606	Homo sapiens	Q96LA8	Q96LA8	R-HSA-5661126;R-HSA-5205820;R-HSA-5205798;R-HSA-5229203;R-HSA-5205824
R-HSA-6811440	Retrograde transport at the Trans-Golgi-Network	1	49	0.00439659	0.347804	0.347804	4	20	0.00169549	4.5	9606	Homo sapiens	Q9NRW1	Q9NRW1	R-HSA-6811431;R-HSA-6811429;R-HSA-6811428;R-HSA-6814682
R-HSA-9012852	Signaling by NOTCH3	1	49	0.00439659	0.347804	0.347804	1	37	0.00313666	5.96	9606	Homo sapiens	Q9Y6A5	Q9Y6A5	R-HSA-9017855
R-HSA-177929	Signaling by EGFR	1	50	0.00448632	0.35348	0.35348	21	48	0.00406918	3.58	9606	Homo sapiens	P22681	P22681	R-HSA-8867047;R-HSA-183072;R-HSA-8867044;R-HSA-8867041;R-HSA-182986;R-HSA-183051;R-HSA-8951490;R-HSA-182990;R-HSA-183055;R-HSA-183084;R-HSA-183052;R-HSA-182988;R-HSA-183058;R-HSA-182994;R-HSA-183089;R-HSA-182993;R-HSA-183094;R-HSA-183002;R-HSA-183067;R-HSA-182969;R-HSA-183036
R-HSA-4570464	SUMOylation of RNA binding proteins	1	51	0.00457604	0.359108	0.359108	1	4	0.000339098	5.91	9606	Homo sapiens	P61978	P61978	R-HSA-4570499
R-HSA-112310	Neurotransmitter release cycle	1	51	0.00457604	0.359108	0.359108	1	32	0.00271278	3.82	9606	Homo sapiens	P51649	P51649	R-HSA-888548
R-HSA-75153	Apoptotic execution phase	1	52	0.00466577	0.364688	0.364688	1	57	0.00483215	5.36	9606	Homo sapiens	Q13813	Q13813	R-HSA-202967
R-HSA-5654736	Signaling by FGFR1	1	53	0.0047555	0.370219	0.370219	5	48	0.00406918	3.58	9606	Homo sapiens	P22681	P22681	R-HSA-934604;R-HSA-1295622;R-HSA-5654672;R-HSA-1295621;R-HSA-5654673
R-HSA-1660499	Synthesis of PIPs at the plasma membrane	1	53	0.0047555	0.370219	0.370219	1	33	0.00279756	3.82	9606	Homo sapiens	P20339	P20339	R-HSA-8871366
R-HSA-5620924	Intraflagellar transport	1	54	0.00484522	0.375703	0.375703	6	12	0.00101729	3.57	9606	Homo sapiens	Q13509	Q13509	R-HSA-5624949;R-HSA-5625424;R-HSA-5625426;R-HSA-5625421;R-HSA-5624952;R-HSA-5625416
R-HSA-9604323	Negative regulation of NOTCH4 signaling	1	55	0.00493495	0.381139	0.381139	1	6	0.000508647	5.96	9606	Homo sapiens	Q9Y6A5	Q9Y6A5	R-HSA-9604675
R-HSA-450408	AUF1 (hnRNP D0) binds and destabilizes mRNA	1	56	0.00502467	0.386529	0.386529	2	4	0.000339098	5.9	9606	Homo sapiens	Q04637	Q04637	R-HSA-450551;R-HSA-450580
R-HSA-429914	Deadenylation-dependent mRNA decay	1	56	0.00502467	0.386529	0.386529	4	10	0.000847745	5.9	9606	Homo sapiens	Q04637	Q04637	R-HSA-430021;R-HSA-429955;R-HSA-8941312;R-HSA-429992
R-HSA-2151201	Transcriptional activation of mitochondrial biogenesis	1	57	0.0051144	0.391872	0.391872	4	32	0.00271278	4.11	9606	Homo sapiens	P51610	P51610	R-HSA-1592232;R-HSA-1592250;R-HSA-1592252;R-HSA-2466367
R-HSA-3371497	HSP90 chaperone cycle for steroid hormone receptors (SHR)	1	57	0.0051144	0.391872	0.391872	1	12	0.00101729	3.57	9606	Homo sapiens	Q13509	Q13509	R-HSA-5618080
R-HSA-8848021	Signaling by PTK6	1	57	0.0051144	0.391872	0.391872	2	53	0.00449305	3.58	9606	Homo sapiens	P22681	P22681	R-HSA-8848818;R-HSA-8848829
R-HSA-9006927	Signaling by Non-Receptor Tyrosine Kinases	1	57	0.0051144	0.391872	0.391872	2	53	0.00449305	3.58	9606	Homo sapiens	P22681	P22681	R-HSA-8848818;R-HSA-8848829
R-HSA-2980766	Nuclear Envelope Breakdown	1	58	0.00520413	0.397169	0.397169	5	13	0.00110207	4.8	9606	Homo sapiens	Q8TD19	Q8TD19	R-HSA-2984220;R-HSA-2980720;R-HSA-2990880;R-HSA-2984226;R-HSA-2984258
R-HSA-917937	Iron uptake and transport	1	58	0.00520413	0.397169	0.397169	1	34	0.00288233	3.49	9606	Homo sapiens	P02792	P02792	R-HSA-1562626
R-HSA-72649	Translation initiation complex formation	1	59	0.00529385	0.40242	0.40242	2	2	0.000169549	5.9	9606	Homo sapiens	Q04637	Q04637	R-HSA-156808;R-HSA-157849
R-HSA-72702	Ribosomal scanning and start codon recognition	1	59	0.00529385	0.40242	0.40242	2	2	0.000169549	5.9	9606	Homo sapiens	Q04637	Q04637	R-HSA-72697;R-HSA-72621
R-HSA-5676590	NIK-->noncanonical NF-kB signaling	1	59	0.00529385	0.40242	0.40242	6	9	0.00076297	3.68	9606	Homo sapiens	Q00653	Q00653	R-HSA-5607731;R-HSA-5607725;R-HSA-5607741;R-HSA-5607726;R-HSA-5607720;R-HSA-5607723
R-HSA-3000171	Non-integrin membrane-ECM interactions	1	59	0.00529385	0.40242	0.40242	1	22	0.00186504	9.87	9606	Homo sapiens	P12814	P12814	R-HSA-2731149
R-HSA-72662	Activation of the mRNA upon binding of the cap-binding complex and eIFs, and subsequent binding to 43S	1	60	0.00538358	0.407627	0.407627	5	6	0.000508647	5.9	9606	Homo sapiens	Q04637	Q04637	R-HSA-72647;R-HSA-72631;R-HSA-72635;R-HSA-156808;R-HSA-157849
R-HSA-5607761	Dectin-1 mediated noncanonical NF-kB signaling	1	60	0.00538358	0.407627	0.407627	7	9	0.00076297	3.68	9606	Homo sapiens	Q00653	Q00653	R-HSA-5660965;R-HSA-5607731;R-HSA-5607725;R-HSA-5607741;R-HSA-5607726;R-HSA-5607720;R-HSA-5607723
R-HSA-75955	RNA Polymerase II Transcription Elongation	1	61	0.00547331	0.412788	0.412788	8	8	0.000678196	3.83	9606	Homo sapiens	Q9Y5B0	Q9Y5B0	R-HSA-112385;R-HSA-113412;R-HSA-112379;R-HSA-113402;R-HSA-112381;R-HSA-112396;R-HSA-113407;R-HSA-112383
R-HSA-112382	Formation of RNA Pol II elongation complex	1	61	0.00547331	0.412788	0.412788	2	2	0.000169549	3.83	9606	Homo sapiens	Q9Y5B0	Q9Y5B0	R-HSA-112379;R-HSA-112381
R-HSA-375165	NCAM signaling for neurite out-growth	1	63	0.00565276	0.422977	0.422977	7	23	0.00194981	5.36	9606	Homo sapiens	Q13813	Q13813	R-HSA-392053;R-HSA-392054;R-HSA-392051;R-HSA-391868;R-HSA-391871;R-HSA-391865;R-HSA-391866
R-HSA-450294	MAP kinase activation	1	63	0.00565276	0.422977	0.422977	4	32	0.00271278	3.85	9606	Homo sapiens	Q9Y6K9	Q9Y6K9	R-HSA-5684275;R-HSA-450337;R-HSA-450346;R-HSA-5684267
R-HSA-6796648	TP53 Regulates Transcription of DNA Repair Genes	1	65	0.00583221	0.432991	0.432991	3	17	0.00144117	3.83	9606	Homo sapiens	Q9Y5B0	Q9Y5B0	R-HSA-6797606;R-HSA-6797616;R-HSA-6797712
R-HSA-421270	Cell-cell junction organization	1	65	0.00583221	0.432991	0.432991	2	21	0.00178026	4.62	9606	Homo sapiens	P55196	P55196-2	R-HSA-433725;R-HSA-419003
R-HSA-8936459	RUNX1 regulates genes involved in megakaryocyte differentiation and platelet function	1	66	0.00592194	0.437934	0.437934	13	33	0.00279756	4.19	9606	Homo sapiens	Q96LA8	Q96LA8	R-HSA-8936584;R-HSA-8937097;R-HSA-8936608;R-HSA-8936995;R-HSA-8937113;R-HSA-8936989;R-HSA-8937118;R-HSA-8937022;R-HSA-8935730;R-HSA-8935731;R-HSA-8935732;R-HSA-8936628;R-HSA-8936599
R-HSA-1169091	Activation of NF-kappaB in B cells	1	67	0.00601166	0.442834	0.442834	3	10	0.000847745	3.85	9606	Homo sapiens	Q9Y6K9	Q9Y6K9	R-HSA-1168641;R-HSA-1168637;R-HSA-1168638
R-HSA-204005	COPII-mediated vesicle transport	1	68	0.00610139	0.447691	0.447691	3	16	0.00135639	4.06	9606	Homo sapiens	Q08379	Q08379	R-HSA-5694418;R-HSA-5694446;R-HSA-5694441
R-HSA-448424	Interleukin-17 signaling	1	71	0.00637057	0.462014	0.462014	4	35	0.00296711	3.85	9606	Homo sapiens	Q9Y6K9	Q9Y6K9	R-HSA-5684275;R-HSA-450337;R-HSA-450346;R-HSA-5684267
R-HSA-1226099	Signaling by FGFR in disease	1	72	0.0064603	0.466706	0.466706	9	106	0.0089861	4.37	9606	Homo sapiens	Q32MZ4	Q32MZ4	R-HSA-1839100;R-HSA-1839039;R-HSA-1839080;R-HSA-1839065;R-HSA-1839098;R-HSA-1839094;R-HSA-1839078;R-HSA-1839031;R-HSA-1839091
R-HSA-170834	Signaling by TGF-beta Receptor Complex	1	73	0.00655002	0.471357	0.471357	2	82	0.00695151	3.58	9606	Homo sapiens	P22681	P22681	R-HSA-4332235;R-HSA-4332236
R-HSA-167172	Transcription of the HIV genome	1	74	0.00663975	0.475968	0.475968	25	47	0.0039844	3.83	9606	Homo sapiens	Q9Y5B0	Q9Y5B0	R-HSA-167181;R-HSA-170706;R-HSA-170704;R-HSA-167191;R-HSA-167192;R-HSA-167196;R-HSA-167197;R-HSA-167459;R-HSA-167072;R-HSA-167076;R-HSA-167077;R-HSA-167147;R-HSA-167083;R-HSA-167150;R-HSA-167087;R-HSA-167148;R-HSA-167084;R-HSA-167085;R-HSA-167090;R-HSA-167282;R-HSA-167478;R-HSA-167284;R-HSA-167288;R-HSA-167481;R-HSA-167292
R-HSA-3371453	Regulation of HSF1-mediated heat shock response	1	75	0.00672948	0.48054	0.48054	5	14	0.00118684	6.76	9606	Homo sapiens	P17066	P17066	R-HSA-5251955;R-HSA-5251942;R-HSA-5251959;R-HSA-5252041;R-HSA-5252079
R-HSA-204998	Cell death signalling via NRAGE, NRIF and NADE	1	76	0.0068192	0.485072	0.485072	2	17	0.00144117	3.83	9606	Homo sapiens	Q13501	Q13501	R-HSA-204947;R-HSA-205008
R-HSA-5654738	Signaling by FGFR2	1	77	0.00690893	0.489565	0.489565	5	46	0.00389963	3.58	9606	Homo sapiens	P22681	P22681	R-HSA-934604;R-HSA-5654677;R-HSA-1295622;R-HSA-1295621;R-HSA-5654729
R-HSA-187037	Signaling by NTRK1 (TRKA)	1	79	0.00708838	0.498435	0.498435	1	59	0.0050017	3.77	9606	Homo sapiens	P50570	P50570	R-HSA-177501
R-HSA-1168372	Downstream signaling events of B Cell Receptor (BCR)	1	81	0.00726783	0.507152	0.507152	3	14	0.00118684	3.85	9606	Homo sapiens	Q9Y6K9	Q9Y6K9	R-HSA-1168641;R-HSA-1168637;R-HSA-1168638
R-HSA-9013694	Signaling by NOTCH4	1	83	0.00744729	0.515719	0.515719	1	20	0.00169549	5.96	9606	Homo sapiens	Q9Y6A5	Q9Y6A5	R-HSA-9604675
R-HSA-438064	Post NMDA receptor activation events	1	83	0.00744729	0.515719	0.515719	1	39	0.00330621	3.57	9606	Homo sapiens	Q13509	Q13509	R-HSA-9619542
R-HSA-674695	RNA Polymerase II Pre-transcription Events	1	84	0.00753701	0.519947	0.519947	7	17	0.00144117	3.83	9606	Homo sapiens	Q9Y5B0	Q9Y5B0	R-HSA-113409;R-HSA-113411;R-HSA-113429;R-HSA-113413;R-HSA-113414;R-HSA-112392;R-HSA-112395
R-HSA-1483255	PI Metabolism	1	84	0.00753701	0.519947	0.519947	1	84	0.00712106	3.82	9606	Homo sapiens	P20339	P20339	R-HSA-8871366
R-HSA-351202	Metabolism of polyamines	1	85	0.00762674	0.524139	0.524139	1	35	0.00296711	3.39	9606	Homo sapiens	P31327	P31327	R-HSA-70555
R-HSA-2565942	Regulation of PLK1 Activity at G2/M Transition	1	87	0.00780619	0.532414	0.532414	3	12	0.00101729	5.74	9606	Homo sapiens	Q96CV9	Q96CV9	R-HSA-2562594;R-HSA-3002811;R-HSA-2562526
R-HSA-450531	Regulation of mRNA stability by proteins that bind AU-rich elements	1	88	0.00789592	0.536498	0.536498	2	26	0.00220414	5.9	9606	Homo sapiens	Q04637	Q04637	R-HSA-450551;R-HSA-450580
R-HSA-190236	Signaling by FGFR	1	94	0.00843428	0.56027	0.56027	11	142	0.012038	3.58	9606	Homo sapiens	P22681	P22681	R-HSA-5654679;R-HSA-934604;R-HSA-5654677;R-HSA-1295622;R-HSA-5654672;R-HSA-1295621;R-HSA-5654673;R-HSA-5654734;R-HSA-5654684;R-HSA-5654730;R-HSA-5654729
R-HSA-380320	Recruitment of NuMA to mitotic centrosomes	1	95	0.008524	0.564113	0.564113	1	2	0.000169549	3.57	9606	Homo sapiens	Q13509	Q13509	R-HSA-380316
R-HSA-3371556	Cellular response to heat stress	1	95	0.008524	0.564113	0.564113	5	29	0.00245846	6.76	9606	Homo sapiens	P17066	P17066	R-HSA-5251955;R-HSA-5251942;R-HSA-5251959;R-HSA-5252041;R-HSA-5252079
R-HSA-442755	Activation of NMDA receptors and postsynaptic events	1	95	0.008524	0.564113	0.564113	3	70	0.00593421	3.57	9606	Homo sapiens	Q13509	Q13509	R-HSA-9610627;R-HSA-9619542;R-HSA-9610408
R-HSA-975956	Nonsense Mediated Decay (NMD) independent of the Exon Junction Complex (EJC)	1	96	0.00861373	0.567923	0.567923	1	1	8.47745e-05	5.9	9606	Homo sapiens	Q04637	Q04637	R-HSA-927789
R-HSA-5689603	UCH proteinases	1	96	0.00861373	0.567923	0.567923	4	11	0.000932519	4.11	9606	Homo sapiens	P51610	P51610	R-HSA-5690790;R-HSA-5690759;R-HSA-5690785;R-HSA-5689630
R-HSA-5620912	Anchoring of the basal body to the plasma membrane	1	97	0.00870345	0.5717	0.5717	5	9	0.00076297	3.8	9606	Homo sapiens	Q8IW35	Q8IW35	R-HSA-5626228;R-HSA-5626227;R-HSA-5626220;R-HSA-5626223;R-HSA-5626699
R-HSA-2168880	Scavenging of heme from plasma	1	99	0.00888291	0.579155	0.579155	2	12	0.00101729	8.23	9606	Homo sapiens	Q07954	Q07954	R-HSA-2168897;R-HSA-2230983
R-HSA-193704	p75 NTR receptor-mediated signalling	1	99	0.00888291	0.579155	0.579155	8	50	0.00423872	3.83	9606	Homo sapiens	Q13501	Q13501	R-HSA-204947;R-HSA-205008;R-HSA-193703;R-HSA-193684;R-HSA-193641;R-HSA-193705;R-HSA-193694;R-HSA-209566
R-HSA-2187338	Visual phototransduction	1	100	0.00897263	0.582835	0.582835	1	80	0.00678196	8.23	9606	Homo sapiens	Q07954	Q07954	R-HSA-2404131
R-HSA-5668541	TNFR2 non-canonical NF-kB pathway	1	102	0.00915209	0.590099	0.590099	6	43	0.0036453	3.68	9606	Homo sapiens	Q00653	Q00653	R-HSA-5607731;R-HSA-5607725;R-HSA-5607741;R-HSA-5607726;R-HSA-5607720;R-HSA-5607723
R-HSA-166520	Signaling by NTRKs	1	103	0.00924181	0.593684	0.593684	1	121	0.0102577	3.77	9606	Homo sapiens	P50570	P50570	R-HSA-177501
R-HSA-5668914	Diseases of metabolism	1	104	0.00933154	0.597238	0.597238	1	114	0.00966429	4.84	9606	Homo sapiens	P05165	P05165	R-HSA-9035990
R-HSA-8856825	Cargo recognition for clathrin-mediated endocytosis	1	105	0.00942127	0.600761	0.600761	1	14	0.00118684	3.58	9606	Homo sapiens	P22681	P22681	R-HSA-8866279
R-HSA-8957275	Post-translational protein phosphorylation	1	107	0.00960072	0.607716	0.607716	1	1	8.47745e-05	3.98	9606	Homo sapiens	O43852	O43852	R-HSA-8952289
R-HSA-3214847	HATs acetylate histones	1	108	0.00969044	0.611148	0.611148	1	15	0.00127162	4.11	9606	Homo sapiens	P51610	P51610	R-HSA-3321805
R-HSA-156580	Phase II - Conjugation of compounds	1	110	0.0098699	0.617924	0.617924	1	68	0.00576467	3.62	9606	Homo sapiens	P28161	P28161	R-HSA-176054
R-HSA-156827	L13a-mediated translational silencing of Ceruloplasmin expression	1	112	0.0100493	0.624583	0.624583	1	3	0.000254323	5.9	9606	Homo sapiens	Q04637	Q04637	R-HSA-156823
R-HSA-72706	GTP hydrolysis and joining of the 60S ribosomal subunit	1	113	0.0101391	0.627869	0.627869	1	3	0.000254323	5.9	9606	Homo sapiens	Q04637	Q04637	R-HSA-72619
R-HSA-72306	tRNA processing	1	113	0.0101391	0.627869	0.627869	1	54	0.00457782	3.57	9606	Homo sapiens	Q9UJA5	Q9UJA5	R-HSA-6783492
R-HSA-5610787	Hedgehog 'off' state	1	114	0.0102288	0.631127	0.631127	2	32	0.00271278	3.57	9606	Homo sapiens	Q13509	Q13509	R-HSA-5610733;R-HSA-5610767
R-HSA-202424	Downstream TCR signaling	1	116	0.0104083	0.637558	0.637558	3	24	0.00203459	3.85	9606	Homo sapiens	Q9Y6K9	Q9Y6K9	R-HSA-202534;R-HSA-202500;R-HSA-202541
R-HSA-927802	Nonsense-Mediated Decay (NMD)	1	117	0.010498	0.640732	0.640732	6	6	0.000508647	5.9	9606	Homo sapiens	Q04637	Q04637	R-HSA-927836;R-HSA-927789;R-HSA-927832;R-HSA-927830;R-HSA-927813;R-HSA-927889
R-HSA-975957	Nonsense Mediated Decay (NMD) enhanced by the Exon Junction Complex (EJC)	1	117	0.010498	0.640732	0.640732	5	5	0.000423872	5.9	9606	Homo sapiens	Q04637	Q04637	R-HSA-927836;R-HSA-927832;R-HSA-927830;R-HSA-927813;R-HSA-927889
R-HSA-72737	Cap-dependent Translation Initiation	1	120	0.0107672	0.65009	0.65009	8	18	0.00152594	5.9	9606	Homo sapiens	Q04637	Q04637	R-HSA-72647;R-HSA-72631;R-HSA-72697;R-HSA-72619;R-HSA-72635;R-HSA-156808;R-HSA-157849;R-HSA-72621
R-HSA-72613	Eukaryotic Translation Initiation	1	120	0.0107672	0.65009	0.65009	9	21	0.00178026	5.9	9606	Homo sapiens	Q04637	Q04637	R-HSA-156823;R-HSA-72647;R-HSA-72631;R-HSA-72697;R-HSA-72619;R-HSA-72635;R-HSA-156808;R-HSA-157849;R-HSA-72621
R-HSA-381426	Regulation of Insulin-like Growth Factor (IGF) transport and uptake by Insulin-like Growth Factor Binding Proteins (IGFBPs)	1	124	0.0111261	0.662192	0.662192	1	14	0.00118684	3.98	9606	Homo sapiens	O43852	O43852	R-HSA-8952289
R-HSA-202403	TCR signaling	1	137	0.0122925	0.698734	0.698734	3	52	0.00440827	3.85	9606	Homo sapiens	Q9Y6K9	Q9Y6K9	R-HSA-202534;R-HSA-202500;R-HSA-202541
R-HSA-1474228	Degradation of the extracellular matrix	1	140	0.0125617	0.706595	0.706595	1	105	0.00890132	5.27	9606	Homo sapiens	P20810	P20810	R-HSA-8848658
R-HSA-194840	Rho GTPase cycle	1	141	0.0126514	0.70917	0.70917	1	5	0.000423872	4.44	9606	Homo sapiens	O75044	O75044	R-HSA-194922
R-HSA-5358351	Signaling by Hedgehog	1	150	0.013459	0.73136	0.73136	2	82	0.00695151	3.57	9606	Homo sapiens	Q13509	Q13509	R-HSA-5610733;R-HSA-5610767
R-HSA-69481	G2/M Checkpoints	1	151	0.0135487	0.73372	0.73372	3	24	0.00203459	5.43	9606	Homo sapiens	Q9NYZ3	Q9NYZ3	R-HSA-8852354;R-HSA-8852337;R-HSA-8852351
R-HSA-162599	Late Phase of HIV Life Cycle	1	152	0.0136384	0.736059	0.736059	25	76	0.00644286	3.83	9606	Homo sapiens	Q9Y5B0	Q9Y5B0	R-HSA-167181;R-HSA-170706;R-HSA-170704;R-HSA-167191;R-HSA-167192;R-HSA-167196;R-HSA-167197;R-HSA-167459;R-HSA-167072;R-HSA-167076;R-HSA-167077;R-HSA-167147;R-HSA-167083;R-HSA-167150;R-HSA-167087;R-HSA-167148;R-HSA-167084;R-HSA-167085;R-HSA-167090;R-HSA-167282;R-HSA-167478;R-HSA-167284;R-HSA-167288;R-HSA-167481;R-HSA-167292
R-HSA-1236974	ER-Phagosome pathway	1	153	0.0137281	0.738378	0.738378	1	10	0.000847745	3.85	9606	Homo sapiens	Q9Y6K9	Q9Y6K9	R-HSA-8863895
R-HSA-162587	HIV Life Cycle	1	165	0.0148048	0.764679	0.764679	25	114	0.00966429	3.83	9606	Homo sapiens	Q9Y5B0	Q9Y5B0	R-HSA-167181;R-HSA-170706;R-HSA-170704;R-HSA-167191;R-HSA-167192;R-HSA-167196;R-HSA-167197;R-HSA-167459;R-HSA-167072;R-HSA-167076;R-HSA-167077;R-HSA-167147;R-HSA-167083;R-HSA-167150;R-HSA-167087;R-HSA-167148;R-HSA-167084;R-HSA-167085;R-HSA-167090;R-HSA-167282;R-HSA-167478;R-HSA-167284;R-HSA-167288;R-HSA-167481;R-HSA-167292
R-HSA-2871837	FCERI mediated NF-kB activation	1	167	0.0149843	0.768801	0.768801	3	19	0.00161072	3.85	9606	Homo sapiens	Q9Y6K9	Q9Y6K9	R-HSA-2730876;R-HSA-202534;R-HSA-202541
R-HSA-1236975	Antigen processing-Cross presentation	1	169	0.0151638	0.772851	0.772851	1	22	0.00186504	3.85	9606	Homo sapiens	Q9Y6K9	Q9Y6K9	R-HSA-8863895
R-HSA-9010553	Regulation of expression of SLITs and ROBOs	1	172	0.0154329	0.778795	0.778795	2	19	0.00161072	5.9	9606	Homo sapiens	Q04637	Q04637	R-HSA-9014652;R-HSA-9014610
R-HSA-983705	Signaling by the B Cell Receptor (BCR)	1	175	0.0157021	0.784585	0.784585	3	43	0.0036453	3.85	9606	Homo sapiens	Q9Y6K9	Q9Y6K9	R-HSA-1168641;R-HSA-1168637;R-HSA-1168638
R-HSA-109581	Apoptosis	1	178	0.0159713	0.790225	0.790225	1	139	0.0117837	5.36	9606	Homo sapiens	Q13813	Q13813	R-HSA-202967
R-HSA-8978868	Fatty acid metabolism	1	179	0.016061	0.792072	0.792072	1	189	0.0160224	4.84	9606	Homo sapiens	P05165	P05165	R-HSA-71031
R-HSA-5357801	Programmed Cell Death	1	183	0.0164199	0.799302	0.799302	1	152	0.0128857	5.36	9606	Homo sapiens	Q13813	Q13813	R-HSA-202967
R-HSA-157118	Signaling by NOTCH	1	205	0.0183939	0.834837	0.834837	2	151	0.0128009	5.96	9606	Homo sapiens	Q9Y6A5	Q9Y6A5	R-HSA-9604675;R-HSA-9017855
R-HSA-112314	Neurotransmitter receptors and postsynaptic signal transmission	1	207	0.0185734	0.83774	0.83774	3	105	0.00890132	3.57	9606	Homo sapiens	Q13509	Q13509	R-HSA-9610627;R-HSA-9619542;R-HSA-9610408
R-HSA-8878171	Transcriptional regulation by RUNX1	1	208	0.0186631	0.839173	0.839173	13	132	0.0111902	4.19	9606	Homo sapiens	Q96LA8	Q96LA8	R-HSA-8936584;R-HSA-8937097;R-HSA-8936608;R-HSA-8936995;R-HSA-8937113;R-HSA-8936989;R-HSA-8937118;R-HSA-8937022;R-HSA-8935730;R-HSA-8935731;R-HSA-8935732;R-HSA-8936628;R-HSA-8936599
R-HSA-397014	Muscle contraction	1	209	0.0187528	0.840593	0.840593	8	41	0.00347575	3.68	9606	Homo sapiens	P67936	P67936	R-HSA-390597;R-HSA-445700;R-HSA-390598;R-HSA-390593;R-HSA-445699;R-HSA-390595;R-HSA-445704;R-HSA-445705
R-HSA-1483257	Phospholipid metabolism	1	212	0.019022	0.844779	0.844779	1	205	0.0173788	3.82	9606	Homo sapiens	P20339	P20339	R-HSA-8871366
R-HSA-2454202	Fc epsilon receptor (FCERI) signaling	1	217	0.0194706	0.851516	0.851516	3	63	0.00534079	3.85	9606	Homo sapiens	Q9Y6K9	Q9Y6K9	R-HSA-2730876;R-HSA-202534;R-HSA-202541
R-HSA-211859	Biological oxidations	1	222	0.0199192	0.857963	0.857963	1	176	0.0149203	3.62	9606	Homo sapiens	P28161	P28161	R-HSA-176054
R-HSA-8951664	Neddylation	1	236	0.0211754	0.874578	0.874578	6	31	0.00262801	5.28	9606	Homo sapiens	Q8NEZ5	Q8NEZ5	R-HSA-8956040;R-HSA-8956200;R-HSA-8955289;R-HSA-8955241;R-HSA-8952618;R-HSA-8952620
R-HSA-162906	HIV Infection	1	248	0.0222521	0.887278	0.887278	25	157	0.0133096	3.83	9606	Homo sapiens	Q9Y5B0	Q9Y5B0	R-HSA-167181;R-HSA-170706;R-HSA-170704;R-HSA-167191;R-HSA-167192;R-HSA-167196;R-HSA-167197;R-HSA-167459;R-HSA-167072;R-HSA-167076;R-HSA-167077;R-HSA-167147;R-HSA-167083;R-HSA-167150;R-HSA-167087;R-HSA-167148;R-HSA-167084;R-HSA-167085;R-HSA-167090;R-HSA-167282;R-HSA-167478;R-HSA-167284;R-HSA-167288;R-HSA-167481;R-HSA-167292
R-HSA-5673001	RAF/MAP kinase cascade	1	259	0.0232391	0.897798	0.897798	1	39	0.00330621	5.36	9606	Homo sapiens	Q13813	Q13813	R-HSA-5672965
R-HSA-5684996	MAPK1/MAPK3 signaling	1	266	0.0238672	0.90398	0.90398	1	46	0.00389963	5.36	9606	Homo sapiens	Q13813	Q13813	R-HSA-5672965
R-HSA-5683057	MAPK family signaling cascades	1	305	0.0273665	0.932224	0.932224	1	86	0.00729061	5.36	9606	Homo sapiens	Q13813	Q13813	R-HSA-5672965
R-HSA-418594	G alpha (i) signalling events	1	408	0.0366083	0.973154	0.973154	1	151	0.0128009	8.23	9606	Homo sapiens	Q07954	Q07954	R-HSA-2404131
R-HSA-382551	Transport of small molecules	1	731	0.06559	0.998613	0.998613	1	434	0.0367921	3.49	9606	Homo sapiens	P02792	P02792	R-HSA-1562626
R-HSA-388396	GPCR downstream signalling	1	1154	0.103544	0.999975	0.999975	1	244	0.020685	8.23	9606	Homo sapiens	Q07954	Q07954	R-HSA-2404131
R-HSA-372790	Signaling by GPCR	1	1217	0.109197	0.999987	0.999987	1	421	0.0356901	8.23	9606	Homo sapiens	Q07954	Q07954	R-HSA-2404131
