# Supplementary material for: A genome-wide screen for human salicylic acid (SA)-binding proteins reveals targets through which SA may influence development of various diseases
Source: Sci Rep. 2019 Sep 11;9:13084. doi: 10.1038/s41598-019-49234-6 (PMC6739329; doi:10.1038/s41598-019-49234-6)
Supplement: Supplementary file 5 — Supplementary Table S5 [file 41598_2019_49234_MOESM5_ESM.xlsx]

## Sheet: S5
Supplementary Table S5. List of disorders/diseases associated with the 95 cSABPs.
Disease Code	Disease	Gene	OMIM ID	Disorder class
C0029401	Osteitis Deformans	OPTN		Bone
C0029401	Osteitis Deformans	SQSTM1		Bone
C0029453	Osteopenia	IARS2		Bone
C0029454	Osteopetrosis	IKBKG		Bone
C0029456	Osteoporosis	CTDP1	166710	Bone
C0029456	Osteoporosis	ENO1	166710	Bone
C0029456	Osteoporosis	PCCA	166710	Bone
C0029456	Osteoporosis	PKM	166710	Bone
C0029456	Osteoporosis	TPM4	166710	Bone
C0158465	Acquired cubitus valgus	CBL		Bone
C0221204	Lytic lesion	IKBKG		Bone
C0221204	Lytic lesion	SQSTM1		Bone
C0222716	Structure of wormian bone	KIF1A		Bone
C0240231	Long bone fractures	SQSTM1		Bone
C0262431	Compression fracture of vertebral column	SQSTM1		Bone
C0264112	Wedging of vertebra	FLNB		Bone
C0264133	Acquired flat foot	FLNB		Bone
C0410550	Collapse of vertebra	SQSTM1		Bone
C0410740	Acquired deformity of finger	IKBKG		Bone
C0541764	Delayed bone age	FLNB		Bone
C0575170	Cervical kyphosis	FLNB		Bone
C0747078	Generalized osteopenia	IARS2		Bone
C0917990	Acro-Osteolysis	KIF1A	102400	bone
C1390474	Increased susceptibility to fractures	SQSTM1		Bone
C1834954	Coronal cleft vertebrae	FLNB		Bone
C1835570	Hypoplastic cervical vertebrae	FLNB		bone
C1835574	Delayed coalescence of calcaneal ossification centers	FLNB		Bone
C1837602	Painless fractures due to injury	KIF1A		Bone
C1844753	Block vertebrae	FLNB		Bone
C1852464	Cervical vertebral abnormalities	CTDP1		Bone
C1862415	Cervical spine segmentation defects	FLNB		Bone
C1867446	Bulging forehead	FLNB		Bone
C1867446	Bulging forehead	IARS2		Bone
C2674432	Decreased bone mineral density Z score	KIF1A		Bone
C2678323	C2-C3 subluxation	FLNB		Bone
C4025049	Distal tapering femur	FLNB		Bone
C4025744	Foot acroosteolysis	KIF1A		Bone
C4085252	PAGET DISEASE OF BONE 3	SQSTM1	167250	Bone
C0001418	Adenocarcinoma	ENO1		Cancer
C0004114	Astrocytoma	NDRG1	137800	Cancer
C0005695	Bladder Neoplasm	ANKFY1		Cancer
C0005695	Bladder Neoplasm	TACC3		Cancer
C0007131	Non-Small Cell Lung Carcinoma	ENO1	211980	Cancer
C0007131	Non-Small Cell Lung Carcinoma	GSTM2	211980	Cancer
C0007131	Non-Small Cell Lung Carcinoma	NDRG1	211980	Cancer
C0007134	Renal Cell Carcinoma	KDM5C		Cancer
C0007134	Renal Cell Carcinoma	NDRG1		Cancer
C0007137	Squamous cell carcinoma	ENO1		Cancer
C0007138	Carcinoma, Transitional Cell	TACC3		Cancer
C0009404	Colorectal Neoplasms	FLNC		Cancer
C0014859	Esophageal Neoplasms	ENO1		Cancer
C0014859	Esophageal Neoplasms	TPM4		Cancer
C0017636	Glioblastoma	NDRG1		Cancer
C0022665	Kidney Neoplasm	NDRG1		Cancer
C0023798	Lipoma	MFN2		Cancer
C0023903	Liver neoplasms	HCFC1		Cancer
C0023903	Liver neoplasms	NDRG1		Cancer
C0023903	Liver neoplasms	PTER		Cancer
C0024121	Lung Neoplasms	IKBKG		Cancer
C0024667	Animal Mammary Neoplasms	ENO1		Cancer
C0024667	Animal Mammary Neoplasms	PKM		Cancer
C0024668	Mammary Neoplasms, Experimental	ENO1		Cancer
C0024668	Mammary Neoplasms, Experimental	PKM		Cancer
C0024668	Mammary Neoplasms, Experimental	RNPEP		Cancer
C0025202	melanoma	NDRG1		Cancer
C0025202	melanoma	PIP4K2A		Cancer
C0025202	melanoma	PTER		Cancer
C0025202	melanoma	SF1		Cancer
C0026640	Mouth Neoplasms	ENO1		Cancer
C0026640	Mouth Neoplasms	NDRG1		Cancer
C0027626	Neoplasm Invasiveness	CALU		Cancer
C0027626	Neoplasm Invasiveness	ENO1		Cancer
C0027626	Neoplasm Invasiveness	FTL		Cancer
C0027626	Neoplasm Invasiveness	PKM		Cancer
C0027627	Neoplasm Metastasis	FTL		Cancer
C0027627	Neoplasm Metastasis	NDRG1		Cancer
C0027627	Neoplasm Metastasis	TPM4		Cancer
C0027659	Neoplasms, Experimental	KIF11		Cancer
C0029295	Oropharyngeal Neoplasms	NDRG1		Cancer
C0029927	Ovarian Cysts	IARS2		Cancer
C0032927	Precancerous Conditions	CPS1		Cancer
C0032927	Precancerous Conditions	TPM4		Cancer
C0033578	Prostatic Neoplasms	JUP		Cancer
C0033578	Prostatic Neoplasms	NDRG1		Cancer
C0038356	Stomach Neoplasms	ENO1		Cancer
C0038356	Stomach Neoplasms	RANBP10		Cancer
C0079773	Lymphoma, T-Cell, Cutaneous	NFKB2		Cancer
C0149925	Small cell carcinoma of lung	NDRG1	182280	Cancer
C0152013	Adenocarcinoma of lung (disorder)	ENO1	211980	Cancer
C0206658	Smooth Muscle Tumor	NDRG1		Cancer
C0206726	gliosarcoma	TACC3		Cancer
C0206734	Hemangioblastoma	NDRG1		Cancer
C0265987	Nevus comedonicus	NEK9		Cancer
C0334121	Inflammatory Myofibroblastic Tumor	TPM4		Cancer
C0334588	Giant Cell Glioblastoma	TACC3		Cancer
C0349639	Juvenile Myelomonocytic Leukemia	CBL	607785	Cancer
C0678222	Breast Carcinoma	RB1CC1		Cancer
C0745730	Multiple lipomata	MFN2		Cancer
C0887833	Carcinoma, Pancreatic Ductal	NDRG1		Cancer
C0919267	ovarian neoplasm	TUBB3		Cancer
C1168401	Squamous cell carcinoma of the head and neck	NDRG1	275355	Cancer
C1458155	Mammary Neoplasms	ENO1		Cancer
C1458155	Mammary Neoplasms	HNRNPK		Cancer
C1458155	Mammary Neoplasms	HNRNPR		Cancer
C1458155	Mammary Neoplasms	LLGL1		Cancer
C1458155	Mammary Neoplasms	NDRG1		Cancer
C1458155	Mammary Neoplasms	RB1CC1		Cancer
C1458155	Mammary Neoplasms	TUBB3		Cancer
C1961099	Precursor T-Cell Lymphoblastic Leukemia-Lymphoma	PHF6		Cancer
C2239176	Liver carcinoma	ENO1	114550	Cancer
C2239176	Liver carcinoma	PKM	114550	Cancer
C3150803	NOONAN SYNDROME-LIKE DISORDER WITH OR WITHOUT JUVENILE MYELOMONOCYTIC LEUKEMIA	CBL	613563	Cancer
C0003507	Aortic Valve Stenosis	CBL	614823	Cardiovascular
C0003811	Cardiac Arrhythmia	PCCA	115000	Cardiovascular
C0007193	Cardiomyopathy, Dilated	JUP		Cardiovascular
C0018800	Cardiomegaly	JUP		Cardiovascular
C0018800	Cardiomegaly	MFN2		Cardiovascular
C0018801	Heart failure	JUP		Cardiovascular
C0018802	Congestive heart failure	JUP		Cardiovascular
C0018817	Atrial Septal Defects	FLNB		Cardiovascular
C0018818	Ventricular Septal Defects	FLNB		Cardiovascular
C0020649	Hypotension	NFKB2		Cardiovascular
C0026266	Mitral Valve Insufficiency	CBL		Cardiovascular
C0031190	Persistent Fetal Circulation Syndrome	CPS1	265380	Cardiovascular
C0034150	Purpura	NFKB2		Cardiovascular
C0042384	Vasculitis	CBL		Cardiovascular
C0042514	Tachycardia, Ventricular	JUP		Cardiovascular
C0085612	Ventricular arrhythmia	JUP		Cardiovascular
C0149630	Bicuspid aortic valve	CBL	109730	Cardiovascular
C0151744	Myocardial Ischemia	GSTM2		Cardiovascular
C0151744	Myocardial Ischemia	RAB5A		Cardiovascular
C0232347	No-Reflow Phenomenon	JUP		Cardiovascular
C0264886	Conduction disorder of the heart	PCCA	115080	Cardiovascular
C0265004	Dilatation of aorta	FLNB		Cardiovascular
C0348616	Other restrictive cardiomyopathy	FLNC		Cardiovascular
C0522055	Electrocardiogram abnormal	PCCA		Cardiovascular
C0855329	Electrocardiogram change	PCCA		Cardiovascular
C0878544	Cardiomyopathies	FLNC		Cardiovascular
C0878544	Cardiomyopathies	JUP		Cardiovascular
C0878544	Cardiomyopathies	PCCA		Cardiovascular
C0948089	Acute Coronary Syndrome	ENO1		Cardiovascular
C0948089	Acute Coronary Syndrome	TPM4		Cardiovascular
C1832602	Episodes of ventricular tachycardia	JUP		Cardiovascular
C1832603	EKG abnormalities	PCCA		Cardiovascular
C1842820	Cardiac conduction abnormalities	PCCA		Cardiovascular
C2063326	Cardiomyopathy, right ventricular	JUP		Cardiovascular
C3551535	Mitral regurgitation, mild	CBL		Cardiovascular
C4024809	Chorioretinal dysplasia	KIF11		Cardiovascular
C0003873	Rheumatoid Arthritis	ENO1	607218,180300	Connective tissue
C0009917	Contracture	DNM2		Connective tissue
C0009917	Contracture	IARS2		Connective tissue
C0009917	Contracture	MFN2		Connective tissue
C0009918	Contracture of joint	DNM2		Connective tissue
C0009918	Contracture of joint	IARS2		Connective tissue
C0009918	Contracture of joint	MFN2		Connective tissue
C0029408	Degenerative polyarthritis	ENO1		Connective tissue
C0029408	Degenerative polyarthritis	FTL		Connective tissue
C0029408	Degenerative polyarthritis	IMMT		Connective tissue
C0029408	Degenerative polyarthritis	PDCD6IP		Connective tissue
C0038015	Spondyloepiphyseal Dysplasia	IARS2		Connective tissue
C0086437	Joint laxity	CBL		Connective tissue
C0086437	Joint laxity	FLNB		Connective tissue
C0162298	Joint stiffness	MFN2		Connective tissue
C0241128	Nikolsky sign	JUP		Connective tissue
C0265283	Atelosteogenesis, type 1	FLNB	108720	Connective tissue
C0332878	Congenital joint contractures	DNM2		Connective tissue
C0333068	Flexion contracture	DNM2		Connective tissue
C0333068	Flexion contracture	IARS2		Connective tissue
C0333068	Flexion contracture	MFN2		Connective tissue
C0409348	Flexion contracture of proximal interphalangeal joint	CTDP1		Connective tissue
C0409348	Flexion contracture of proximal interphalangeal joint	IKBKG		Connective tissue
C0410264	Contracture of tendo achilles	BICD2		Connective tissue
C1850530	Flexion contractures of joints	DNM2		Connective tissue
C1850530	Flexion contractures of joints	IARS2		Connective tissue
C1850530	Flexion contractures of joints	MFN2		Connective tissue
C3495559	Juvenile arthritis	HSPA6		Connective tissue
C3553764	Joint hyperflexibility	FLNB		Connective tissue
C3668942	Atelosteogenesis Type 3	FLNB	108721,603381	Connective tissue
C4022506	Multinucleated giant chondrocytes in epiphyseal cartilage	FLNB		Connective tissue
C0000887	Acantholysis	JUP		Dermatological
C0002170	Alopecia	IKBKG		Dermatological
C0002170	Alopecia	JUP		Dermatological
C0002171	Alopecia Areata	KDM5C		Dermatological
C0008767	Cicatrization	IKBKG		Dermatological
C0013575	Ectodermal Dysplasia	IKBKG		Dermatological
C0013595	Eczema	PCCA		Dermatological
C0015230	Exanthema	IKBKG		Dermatological
C0022548	Keloid	FTL		Dermatological
C0022568	Keratitis	IKBKG		Dermatological
C0022596	Palmoplantar Keratosis	CAST		Dermatological
C0022596	Palmoplantar Keratosis	JUP		Dermatological
C0037299	Skin Ulcer	IKBKG		Dermatological
C0041834	Erythema	IKBKG		Dermatological
C0085661	Onycholysis	JUP		Dermatological
C0150993	Pitting of nails	IKBKG		Dermatological
C0151908	Dry skin	IKBKG		Dermatological
C0221260	Dystrophia unguium	IKBKG		Dermatological
C0221260	Dystrophia unguium	JUP		Dermatological
C0221260	Dystrophia unguium	NFKB2		Dermatological
C0221263	Cafe-au-Lait Spots	CBL		Dermatological
C0237849	Peeling of skin	CAST		Dermatological
C0240182	Leukonychia	CAST		Dermatological
C0241054	Skin bulla	IKBKG		Dermatological
C0241181	Fragile skin	JUP		Dermatological
C0259817	Xerosis	IKBKG		Dermatological
C0263429	Atrophoderma vermiculatum	LRP1	209700	Dermatological
C0263537	Onychogryposis	IKBKG		Dermatological
C0343057	Keratosis pilaris decalvans	LRP1		Dermatological
C0423820	Ridged nails	IKBKG		Dermatological
C0870082	Hyperkeratosis	IKBKG		Dermatological
C1260926	Abnormal pigmentation	IKBKG		Dermatological
C1833225	Dystrophic toenail changes	KIF1A		Dermatological
C1834405	Nail dysplasia	IKBKG		Dermatological
C1836543	Thick vermilion border	CBL		Dermatological
C1836735	hypopigmented skin patch	IKBKG		Dermatological
C1846006	Ectodermal dysplasia, hypohidrotic, with immune deficiency	IKBKG	300248,300291	Dermatological
C1860236	Irregular hyperpigmentation	IKBKG		Dermatological
C1864826	Epidermolysis bullosa, lethal acantholytic	JUP	609638	Dermatological
C2132198	Abnormal blistering of the skin	IKBKG		Dermatological
C2220104	Blister of skin	IKBKG		Dermatological
C3551426	Dystrophic fingernails	KIF1A		Dermatological
C3665596	Warts	IKBKG		Dermatological
C3806306	Periarticular subcutaneous nodules	IARS2		Dermatological
C3887524	Skin Erosion	JUP		Dermatological
C4021966	Abnormality of the periungual region	NFKB2		Dermatological
C4022018	Telangiectasia of the skin	IKBKG		Dermatological
C4225381	PEELING SKIN WITH LEUKONYCHIA, ACRAL PUNCTATE KERATOSES, CHEILITIS, AND KNUCKLE PADS	CAST	616295	Dermatological
C0000786	Spontaneous abortion	GPHN		Developmental
C0002938	Aneuploidy	KIF11		Developmental
C0003466	Anus, Imperforate	NFKB2	207500,301800	Developmental
C0003886	Arthrogryposis	KIF14		Developmental
C0008924	Cleft Lip	FLNB		Developmental
C0008924	Cleft Lip	JUP		Developmental
C0008925	Cleft Palate	FLNB		Developmental
C0009081	Congenital clubfoot	BICD2	119800	Developmental
C0009081	Congenital clubfoot	CTDP1	119800	Developmental
C0009081	Congenital clubfoot	FLNB	119800	Developmental
C0009081	Congenital clubfoot	KDM5C	119800	Developmental
C0010278	Craniosynostosis	HNRNPK	123100	Developmental
C0011351	Dental Enamel Hypoplasia	FLNB		Developmental
C0013080	Down Syndrome	GSTM2	190685	Developmental
C0015934	Fetal Growth Retardation	CTDP1		Developmental
C0015934	Fetal Growth Retardation	FLNB		Developmental
C0015934	Fetal Growth Retardation	KIF14		Developmental
C0017566	Gingival Hyperplasia	KIF1A		Developmental
C0017567	Gingival Hypertrophy	KIF1A		Developmental
C0018273	Growth Disorders	CBL		Developmental
C0018564	Hand deformities	NDRG1		Developmental
C0019555	Hip Dislocation, Congenital	HNRNPK	142700	Developmental
C0019555	Hip Dislocation, Congenital	IARS2	142700	Developmental
C0020224	Polyhydramnios	DNM2		Developmental
C0020224	Polyhydramnios	FLNB		Developmental
C0020534	Orbital separation excessive	CBL	145400	Developmental
C0020534	Orbital separation excessive	FLNB	145400	Developmental
C0021296	Infant, Small for Gestational Age	CTDP1		Developmental
C0021296	Infant, Small for Gestational Age	FLNB		Developmental
C0021296	Infant, Small for Gestational Age	KIF14		Developmental
C0021364	Male infertility	ENO1		Developmental
C0024032	Low Birth Weights	DNM2		Developmental
C0025990	Micrognathism	CTDP1		Developmental
C0025990	Micrognathism	FLNB		Developmental
C0025990	Micrognathism	KDM5C		Developmental
C0025990	Micrognathism	TCOF1		Developmental
C0025995	Micromelia	FLNB		Developmental
C0026034	Microstomia	IARS2		Developmental
C0029422	Osteochondrodysplasias	TCOF1		Developmental
C0040427	Tooth Abnormalities	CTDP1		Developmental
C0040427	Tooth Abnormalities	IKBKG		Developmental
C0079924	Oligohydramnios	KIF14		Developmental
C0080174	Spina Bifida Occulta	FLNB		Developmental
C0080178	Spina Bifida	PCMT1	182940	Developmental
C0151526	Premature Birth	FLNB		Developmental
C0152115	Lingual-Facial-Buccal Dyskinesia	FTL		Developmental
C0152421	Macrotia	CBL		Developmental
C0152421	Macrotia	KDM5C		Developmental
C0152421	Macrotia	KIF1A		Developmental
C0152423	Congenital small ears	HNRNPK		Developmental
C0152423	Congenital small ears	TCOF1		Developmental
C0158646	Cleft palate with cleft lip	IKBKG		Developmental
C0158731	Congenital pectus carinatum	FLNB		Developmental
C0175778	Larsen syndrome	FLNB	150250	Developmental
C0220697	POLYDACTYLY, POSTAXIAL	HNRNPK	174200	Developmental
C0221217	Neck webbing	CBL		Developmental
C0221352	Syndactyly of fingers	FLNB		Developmental
C0221354	Frontal bossing	CBL		Developmental
C0221354	Frontal bossing	FLNB		Developmental
C0221354	Frontal bossing	IKBKG		Developmental
C0221354	Frontal bossing	TCOF1		Developmental
C0221356	Brachycephaly	HCFC1		Developmental
C0221356	Brachycephaly	NFKB2		Developmental
C0221357	Brachydactyly	FLNB		Developmental
C0221357	Brachydactyly	KDM5C		Developmental
C0221358	Long narrow head	HNRNPK		Developmental
C0221373	Claw hand	CTDP1		Developmental
C0232513	Premature tooth loss	SQSTM1		Developmental
C0233315	Premature birth of newborn	FLNB		Developmental
C0235659	Reduced fetal movement	DNM2		Developmental
C0235991	Small for gestational age (disorder)	DNM2		Developmental
C0239067	Difficulty walking up stairs	FLNC		Developmental
C0239174	Late tooth eruption	IKBKG		Developmental
C0239234	Low set ears	CBL		Developmental
C0240295	Mandibular hypoplasia	CTDP1		Developmental
C0240295	Mandibular hypoplasia	FLNB		Developmental
C0240295	Mandibular hypoplasia	KDM5C		Developmental
C0240295	Mandibular hypoplasia	TCOF1		Developmental
C0240310	Hypoplasia of the maxilla	FLNB		Developmental
C0240310	Hypoplasia of the maxilla	KDM5C		Developmental
C0240310	Hypoplasia of the maxilla	TCOF1		Developmental
C0240379	Open mouth	HNRNPK		Developmental
C0240379	Open mouth	KIF1A		Developmental
C0240635	Byzanthine arch palate	HNRNPK		Developmental
C0240912	Vertical Talus	KIF14	192950	Developmental
C0241395	Spatulate thumbs	FLNB		Developmental
C0242387	Mandibulofacial Dysostosis	TCOF1	154500	Developmental
C0262444	Dental abnormalities	CTDP1		Developmental
C0262444	Dental abnormalities	IKBKG		Developmental
C0265241	Franceschetti-Klein syndrome	TCOF1		Developmental
C0265609	Accessory carpal bone	FLNB		Developmental
C0265642	Talipes Equinovalgus	FLNB		Developmental
C0265646	Talipes Calcaneovarus	KDM5C		Developmental
C0265654	Tarsal Coalition	FLNB	186850	Developmental
C0265677	Congenital hemivertebra	IKBKG		Developmental
C0265974	Birthmark	CBL		Developmental
C0265998	ANONYCHIA	JUP		Developmental
C0266009	Congenital absence of breast	IKBKG		Developmental
C0266011	Accessory nipple	IKBKG	163700	Developmental
C0266013	Congenital hypoplasia of breast	IKBKG		Developmental
C0266061	Open Bite	TCOF1		Developmental
C0266295	Congenital hypoplasia of kidney	KIF14		Developmental
C0266435	Congenital hypoplasia of penis	KDM5C	607306	Developmental
C0266617	Congenital anomaly of face	CTDP1		Developmental
C0269269	Inversion of nipple (disorder)	HNRNPK	163600	Developmental
C0302501	Mandibular hyperplasia	KDM5C		Developmental
C0302501	Mandibular hyperplasia	KIF11		Developmental
C0345375	Congenital hypoplasia of femur	FLNB		Developmental
C0345397	Accessory rib	IKBKG		Developmental
C0349588	Short stature	CTDP1		Developmental
C0349588	Short stature	FLNB		Developmental
C0349588	Short stature	HCFC1		Developmental
C0349588	Short stature	IARS2		Developmental
C0349588	Short stature	IKBKG		Developmental
C0349588	Short stature	KDM5C		Developmental
C0349588	Short stature	PCCA		Developmental
C0376480	Gingival Overgrowth	KIF1A		Developmental
C0392476	Epiphyseal dysplasia	FLNB		Developmental
C0399526	Class III malocclusion	KDM5C	176700	Developmental
C0399526	Class III malocclusion	KIF11	176700	Developmental
C0423109	Upward slant of palpebral fissure	KDM5C		Developmental
C0423110	Downward slant of palpebral fissure	CBL		Developmental
C0423110	Downward slant of palpebral fissure	HNRNPK		Developmental
C0423110	Downward slant of palpebral fissure	KIF11		Developmental
C0423110	Downward slant of palpebral fissure	TCOF1		Developmental
C0423808	Brachyonychia	FLNB		Developmental
C0424503	Dysmorphic facies	CTDP1		Developmental
C0424688	Small head	HCFC1		Developmental
C0424688	Small head	IKBKG		Developmental
C0424688	Small head	KIF11		Developmental
C0424688	Small head	KIF14		Developmental
C0424688	Small head	KIF1A		Developmental
C0424688	Small head	TUBB3		Developmental
C0426429	Broad nasal tip	FLNB		Developmental
C0426429	Broad nasal tip	KIF11		Developmental
C0426790	Narrow thorax	FLNB		Developmental
C0426848	Sacral dimples	HNRNPK		Developmental
C0426870	Large hand	KDM5C		Developmental
C0426886	Tapering fingers (finding)	HUWE1		Developmental
C0426886	Tapering fingers (finding)	KIF1A		Developmental
C0426891	Broad thumbs	FLNB		Developmental
C0431478	Posteriorly rotated ear	CBL		Developmental
C0431483	Simple ear	TCOF1		Developmental
C0431863	Carpal synostosis	FLNB		Developmental
C0432355	Hypoplasia of nipple	IKBKG		Developmental
C0521525	Short neck	CBL		Developmental
C0521525	Short neck	FLNB		Developmental
C0546964	Genu recurvatum	CTDP1		Developmental
C0554972	Large auricle	CBL		Developmental
C0554972	Large auricle	KDM5C		Developmental
C0554972	Large auricle	KIF1A		Developmental
C0560346	Difficulty running	BICD2		Developmental
C0576093	Knee joint valgus deformity	IARS2		Developmental
C0595939	Stillbirth	FLNB		Developmental
C0678230	Congenital Epicanthus	CBL	131500	Developmental
C0678230	Congenital Epicanthus	KIF11	131500	Developmental
C0678230	Congenital Epicanthus	KIF1A	131500	Developmental
C0728829	Congenital pes cavus	CTDP1		Developmental
C0728829	Congenital pes cavus	DNM2		Developmental
C0728829	Congenital pes cavus	MFN2		Developmental
C0795690	Congenital omphalocele	FLNB		Developmental
C0857379	Auricular malformation	TCOF1		Developmental
C0920299	Overriding toe	HNRNPK		Developmental
C1136179	Hammer Toe	MFN2		Developmental
C1142533	Smooth philtrum	KDM5C		Developmental
C1385263	facial deformity	CTDP1		Developmental
C1386048	Intrauterine retardation	CTDP1		Developmental
C1386048	Intrauterine retardation	FLNB		Developmental
C1386048	Intrauterine retardation	KIF14		Developmental
C1405984	Absent radius	FLNB		Developmental
C1827524	Wide spaced nipples	CBL		Developmental
C1827524	Wide spaced nipples	HNRNPK		Developmental
C1832117	Short upper arms	FLNB		Developmental
C1832342	Talipes cavus equinovarus	NDRG1		Developmental
C1832446	Sparse eyebrow	JUP		Developmental
C1835148	Partial absence of lower eyelashes	TCOF1		Developmental
C1835573	Multiple carpal ossification centers	FLNB		Developmental
C1835581	Large protruding ears	CBL		Developmental
C1835581	Large protruding ears	KDM5C		Developmental
C1835581	Large protruding ears	KIF1A		Developmental
C1835884	Triangular face	CBL		Developmental
C1836047	Long face	HNRNPK		Developmental
C1836542	Depressed nasal bridge	CBL		Developmental
C1836542	Depressed nasal bridge	FLNB		Developmental
C1836542	Depressed nasal bridge	IARS2		Developmental
C1836542	Depressed nasal bridge	KIF11		Developmental
C1836940	Excess nuchal skin	HNRNPK		Developmental
C1836940	Excess nuchal skin	SQSTM1		Developmental
C1837084	Short metacarpal	FLNB		Developmental
C1837260	Prominent forehead	FLNB		Developmental
C1837260	Prominent forehead	IARS2		Developmental
C1837402	Flat occiput	KIF11		Developmental
C1837404	High, narrow palate	KDM5C		Developmental
C1837770	Sparse hair	CBL		Developmental
C1837770	Sparse hair	IKBKG		Developmental
C1839731	11 pairs of ribs	FLNB		Developmental
C1839739	Prominent lower lip	KIF11		Developmental
C1839764	Broad flat nasal bridge	FLNB		Developmental
C1839764	Broad flat nasal bridge	TCOF1		Developmental
C1839797	Deep philtrum	CBL		Developmental
C1839797	Deep philtrum	KIF11		Developmental
C1839829	Short distal phalanges	FLNB		Developmental
C1839829	Short distal phalanges	KDM5C		Developmental
C1840069	Sandal gap	FLNB		Developmental
C1840077	Anteverted nostril	KIF11		Developmental
C1840077	Anteverted nostril	KIF1A		Developmental
C1842366	Low anterior hairline	TCOF1		Developmental
C1845250	Small forehead	KDM5C		Developmental
C1845251	Facial hypotonia	KDM5C		Developmental
C1845847	Coarse facial features	HUWE1		Developmental
C1846435	Short-trunked dwarfism	FLNB		Developmental
C1846439	ODONTOID HYPOPLASIA	FLNB	613628	Developmental
C1846460	Malformed pinnae	KIF1A		Developmental
C1848570	Large, floppy ears	CBL		Developmental
C1848570	Large, floppy ears	KDM5C		Developmental
C1848570	Large, floppy ears	KIF1A		Developmental
C1848673	Hypoplastic feet	KDM5C		Developmental
C1848924	Infantile onset	ALDH5A1		Developmental
C1848924	Infantile onset	CTDP1		Developmental
C1848924	Infantile onset	GPHN		Developmental
C1848924	Infantile onset	HCFC1		Developmental
C1848924	Infantile onset	KIF1A		Developmental
C1848924	Infantile onset	MFN2		Developmental
C1848924	Infantile onset	SPTAN1		Developmental
C1849020	Short metatarsal	FLNB		Developmental
C1849034	Hypoplastic iliac body	FLNB		Developmental
C1849314	Absence of radius and ulna	FLNB		Developmental
C1849340	Long palpebral fissure	HNRNPK		Developmental
C1849367	Nasal bridge wide	FLNB		Developmental
C1849367	Nasal bridge wide	TCOF1		Developmental
C1850049	Bilateral fifth finger clinodactyly	FLNB		Developmental
C1850189	Large pinnae	CBL		Developmental
C1850189	Large pinnae	KDM5C		Developmental
C1850189	Large pinnae	KIF1A		Developmental
C1850630	Broad distal phalanges	FLNB		Developmental
C1851854	Thin dental enamel	FLNB		Developmental
C1853241	Flat face	FLNB		Developmental
C1853242	Midface retrusion	FLNB		Developmental
C1853242	Midface retrusion	KIF1A		Developmental
C1853242	Midface retrusion	TCOF1		Developmental
C1853737	Prominent occiput	FLNB		Developmental
C1853738	Long eyelashes	CTDP1		Developmental
C1854114	Short nose	FLNB		Developmental
C1854114	Short nose	KIF1A		Developmental
C1854301	Motor delay	ALDH5A1		Developmental
C1854301	Motor delay	BICD2		Developmental
C1854301	Motor delay	CTDP1		Developmental
C1854301	Motor delay	DNM2		Developmental
C1854301	Motor delay	IARS2		Developmental
C1854418	Biparietal narrowing	KIF1A		Developmental
C1855062	Large dysplastic ears	CBL		Developmental
C1855062	Large dysplastic ears	KDM5C		Developmental
C1855062	Large dysplastic ears	KIF1A		Developmental
C1856136	Peg-shaped incisors	IKBKG		Developmental
C1856732	Hypoplastic/aplastic fibulae	FLNB		Developmental
C1856786	Hypoplastic fingernails	IKBKG		Developmental
C1857042	Sparse scalp hair	JUP		Developmental
C1857130	Hypoplastic mandible condyle	CTDP1		Developmental
C1857130	Hypoplastic mandible condyle	FLNB		Developmental
C1857130	Hypoplastic mandible condyle	KDM5C		Developmental
C1857130	Hypoplastic mandible condyle	TCOF1		Developmental
C1857206	Laterally sparse eyebrows	HNRNPK		Developmental
C1857679	Sloping forehead	KIF11		Developmental
C1857679	Sloping forehead	KIF14		Developmental
C1858085	Malar flattening	FLNB		Developmental
C1858085	Malar flattening	KIF1A		Developmental
C1858085	Malar flattening	TCOF1		Developmental
C1858719	Facial muscle weakness of muscles innervated by CN VII	DNM2		Developmental
C1858732	Prominent midface	CTDP1		Developmental
C1859680	Broad face	FLNB		Developmental
C1860105	Severe short-limb dwarfism	FLNB		Developmental
C1860816	Preauricular skin tag	FLNB		Developmental
C1860838	Large prominent ears	CBL		Developmental
C1860838	Large prominent ears	KDM5C		Developmental
C1860838	Large prominent ears	KIF1A		Developmental
C1860844	Thin, sparse hair	CBL		Developmental
C1860844	Thin, sparse hair	IKBKG		Developmental
C1861328	Hypoplastic nasal septum	FLNB		Developmental
C1861329	Spinal canal stenosis	IARS2		Developmental
C1865014	Long philtrum	CBL		Developmental
C1865014	Long philtrum	IARS2		Developmental
C1865014	Long philtrum	KIF11		Developmental
C1865017	Thin upper lip vermilion	KDM5C		Developmental
C1865017	Thin upper lip vermilion	KIF11		Developmental
C1865903	Long tract signs	SQSTM1		Developmental
C1866195	Downturned corners of mouth	HNRNPK		Developmental
C1866231	Full cheeks	KIF1A		Developmental
C1866730	Rhizomelia	FLNB		Developmental
C2051831	Pectus excavatum	CBL		Developmental
C2051831	Pectus excavatum	FLNB		Developmental
C2051831	Pectus excavatum	HNRNPK		Developmental
C2051831	Pectus excavatum	KDM5C		Developmental
C2053437	Full lower lip	KIF11		Developmental
C2227134	mandibular excess (physical finding)	KDM5C		Developmental
C2227134	mandibular excess (physical finding)	KIF11		Developmental
C2315100	Pediatric failure to thrive	CPS1		Developmental
C2315100	Pediatric failure to thrive	HCFC1		Developmental
C2315100	Pediatric failure to thrive	PCCA		Developmental
C2673410	Small midface	FLNB		Developmental
C2673410	Small midface	KIF1A		Developmental
C2673410	Small midface	TCOF1		Developmental
C2677362	Alveolar capillary dysplasia	CPS1		Developmental
C2748653	Chubby cheeks	KIF1A		Developmental
C2752013	Prenatal onset	DNM2		Developmental
C2752013	Prenatal onset	TUBB3		Developmental
C2931648	Larsen syndrome, dominant type	FLNB		Developmental
C2981150	Uranostaphyloschisis	FLNB		Developmental
C3494422	Retrognathia	TCOF1		Developmental
C3550546	Depressed nasal root/bridge	CBL		Developmental
C3550546	Depressed nasal root/bridge	FLNB		Developmental
C3550546	Depressed nasal root/bridge	IARS2		Developmental
C3550546	Depressed nasal root/bridge	KIF11		Developmental
C3808397	CORTICAL DYSPLASIA, COMPLEX, WITH OTHER BRAIN MALFORMATIONS 1	TUBB3	614039	Developmental
C3887527	Fused cervical vertebrae	FLNB		Developmental
C4020718	Wide nasal ridge	HNRNPK		Developmental
C4020759	Pointed incisor	IKBKG		Developmental
C4020847	Abnormality of pelvic girdle bone morphology	FLNB		Developmental
C4020847	Abnormality of pelvic girdle bone morphology	SQSTM1		Developmental
C4020861	Depressed philtrum	CBL		Developmental
C4020861	Depressed philtrum	KIF11		Developmental
C4020866	Equinovalgus deformity	FLNB		Developmental
C4020874	No development of motor milestones	ALDH5A1		Developmental
C4020874	No development of motor milestones	BICD2		Developmental
C4020874	No development of motor milestones	CTDP1		Developmental
C4020874	No development of motor milestones	DNM2		Developmental
C4020874	No development of motor milestones	IARS2		Developmental
C4021242	Hypoplasia of the zygomatic bone	TCOF1		Developmental
C4021611	Abnormality of epiphysis morphology	KIF1A		Developmental
C4021657	Abnormality of bone mineral density	TCOF1		Developmental
C4021735	Abnormality of the hip bone	KIF1A		Developmental
C4021741	Abnormal cortical bone morphology	KIF1A		Developmental
C4021742	Abnormality of the humerus	FLNB		Developmental
C4021750	Abnormality of the femur	FLNB		Developmental
C4021779	Abnormality of the calf musculature	FLNC		Developmental
C4021785	Abnormality of the metacarpal bones	FLNB		Developmental
C4021813	Oral cleft	IKBKG		Developmental
C4021815	Abnormality of the palate	KIF1A		Developmental
C4022025	Asymmetric growth	IKBKG		Developmental
C4023457	Short face	TCOF1		Developmental
C4023909	Aplasia/Hypoplasia of the abdominal wall musculature	FLNB		Developmental
C4024202	Reduced number of teeth	TCOF1		Developmental
C4024996	Aplasia/Hypoplasia of the lungs	FLNB		Developmental
C4025109	Abnormal hand morphology	IKBKG		Developmental
C4025214	Sleepy facial expression	DNM2		Developmental
C4025660	Abnormality of the ankles	KIF1A		Developmental
C4025663	Abnormality of the tibia	FLNB		Developmental
C4025675	Abnormality of the radius	FLNB		Developmental
C4025676	Abnormality of the knee	KIF1A		Developmental
C4025884	Abnormality of upper lip	KIF1A		Developmental
C4072823	Broad cranium shape	HCFC1		Developmental
C4072823	Broad cranium shape	NFKB2		Developmental
C4072824	Wide skull shape	HCFC1		Developmental
C4072824	Wide skull shape	NFKB2		Developmental
C4072825	Thickened facial skin with coarse facial features	HUWE1		Developmental
C4072826	Skin tag on the posterior cheek	FLNB		Developmental
C4072832	Distortion of face	CTDP1		Developmental
C4072833	Funny looking face	CTDP1		Developmental
C4072834	Rough hair texture	IKBKG		Developmental
C4072835	Kinky hair texture	JUP		Developmental
C4072836	Nappy hair texture	JUP		Developmental
C4072879	Small cheekbone	TCOF1		Developmental
C4073292	Afro-textured hair	JUP		Developmental
C4082243	Maxillary retrognathia	FLNB		Developmental
C4082243	Maxillary retrognathia	KDM5C		Developmental
C4082243	Maxillary retrognathia	TCOF1		Developmental
C4082304	Oligodontia	HNRNPK		Developmental
C4083050	Agenesis of teeth	TCOF1		Developmental
C4083076	Increased head circumference	HUWE1		Developmental
C4083076	Increased head circumference	KDM5C		Developmental
C4255213	Increased size of skull	HUWE1		Developmental
C4255213	Increased size of skull	KDM5C		Developmental
C4280320	Hypotrophic midface	FLNB		Developmental
C4280320	Hypotrophic midface	KIF1A		Developmental
C4280320	Hypotrophic midface	TCOF1		Developmental
C4280321	Decreased projection of midface	FLNB		Developmental
C4280321	Decreased projection of midface	KIF1A		Developmental
C4280321	Decreased projection of midface	TCOF1		Developmental
C4280341	Pointed front tooth	IKBKG		Developmental
C4280342	Peg shaped front tooth	IKBKG		Developmental
C4280368	Hypotrophic cheekbone	TCOF1		Developmental
C4280369	Flattening of the zygomatic bone	TCOF1		Developmental
C4280370	Depressed cheekbone	TCOF1		Developmental
C4280374	Hyperplasia of malar bones	CTDP1		Developmental
C4280456	Dysplasia of tooth enamel	FLNB		Developmental
C4280457	Defective enamel matrix	FLNB		Developmental
C4280482	Flat back of the head	KIF11		Developmental
C4280495	Concave bridge of nose	CBL		Developmental
C4280495	Concave bridge of nose	FLNB		Developmental
C4280495	Concave bridge of nose	IARS2		Developmental
C4280495	Concave bridge of nose	KIF11		Developmental
C4280532	Decreased width of the skull	KIF1A		Developmental
C4280538	Curvature of little finger	FLNB		Developmental
C4280566	Abnormal development of end part of bone	FLNB		Developmental
C4280567	Abnormal skeletal development	TCOF1		Developmental
C4280574	Problems speaking	HNRNPK		Developmental
C4280574	Problems speaking	SQSTM1		Developmental
C4280576	Difficulty making arithmetical calculations	SQSTM1		Developmental
C4280619	Missing more than six teeth	HNRNPK		Developmental
C4280624	Blind spot located at fixation point	MFN2		Developmental
C4280625	Decreased size of eyeball	CTDP1		Developmental
C4280625	Decreased size of eyeball	IKBKG		Developmental
C4280626	Aplasia of eyelashes	TCOF1		Developmental
C4280627	Failure of development of eyelashes	TCOF1		Developmental
C4280633	Hypotrophic forehead	KDM5C		Developmental
C4280634	Hypoplasia of forehead	KDM5C		Developmental
C4280640	Retrusion of upper jaw bones	FLNB		Developmental
C4280640	Retrusion of upper jaw bones	KDM5C		Developmental
C4280640	Retrusion of upper jaw bones	TCOF1		Developmental
C4280641	Hypotrophic maxilla	FLNB		Developmental
C4280641	Hypotrophic maxilla	KDM5C		Developmental
C4280641	Hypotrophic maxilla	TCOF1		Developmental
C4280642	Deficiency of upper jaw bones	FLNB		Developmental
C4280642	Deficiency of upper jaw bones	KDM5C		Developmental
C4280642	Deficiency of upper jaw bones	TCOF1		Developmental
C4280643	Decreased projection of maxilla	FLNB		Developmental
C4280643	Decreased projection of maxilla	KDM5C		Developmental
C4280643	Decreased projection of maxilla	TCOF1		Developmental
C4280644	Increased size of mandible	KDM5C		Developmental
C4280644	Increased size of mandible	KIF11		Developmental
C4280645	Hypertrophy of lower jaw	KDM5C		Developmental
C4280645	Hypertrophy of lower jaw	KIF11		Developmental
C4280646	Atony of facial musculature	KDM5C		Developmental
C4280647	Hypertrophy of cheeks	KIF1A		Developmental
C4280648	Hyperplasia of cheeks	KIF1A		Developmental
C4280651	Hypotrophic malar bone	FLNB		Developmental
C4280651	Hypotrophic malar bone	KIF1A		Developmental
C4280651	Hypotrophic malar bone	TCOF1		Developmental
C4280652	Prominent back of the head	FLNB		Developmental
C4280653	Turridolichocephaly	HNRNPK		Developmental
C4280654	Narrow skull shape	HNRNPK		Developmental
C4280655	Narrow head shape	HNRNPK		Developmental
C4280656	Narrow cranium shape	HNRNPK		Developmental
C4280663	Increased size of cranium	HUWE1		Developmental
C4280663	Increased size of cranium	KDM5C		Developmental
C4280664	Big calvaria	HUWE1		Developmental
C4280664	Big calvaria	KDM5C		Developmental
C0003126	Anosmia	MFN2	301700	Ear, Nose, Throat
C0011053	Deafness	NDRG1		Ear, Nose, Throat
C0018772	Hearing Loss, Partial	NDRG1		Ear, Nose, Throat
C0018777	Conductive hearing loss	FLNB		Ear, Nose, Throat
C0018777	Conductive hearing loss	TCOF1		Ear, Nose, Throat
C0018784	Sensorineural Hearing Loss (disorder)	IARS2		Ear, Nose, Throat
C0040264	Tinnitus	MFN2		Ear, Nose, Throat
C0155552	Hearing Loss, Mixed Conductive-Sensorineural	FLNB		Ear, Nose, Throat
C0271441	Chronic otitis media	NFKB2		Ear, Nose, Throat
C0339789	Congenital deafness	NDRG1		Ear, Nose, Throat
C0426414	Small nose	FLNB		Ear, Nose, Throat
C0426414	Small nose	KIF1A		Ear, Nose, Throat
C0452138	Sensorineural hearing loss, bilateral	IARS2		Ear, Nose, Throat
C0581354	Recurrent sinusitis	NFKB2		Ear, Nose, Throat
C0743359	ear infection chronic	NFKB2		Ear, Nose, Throat
C0747085	Recurrent otitis media	NFKB2	166760	Ear, Nose, Throat
C0747556	pharyngitis recurrent	NFKB2		Ear, Nose, Throat
C1305420	Prominent ear	KIF11		Ear, Nose, Throat
C1384666	hearing impairment	NDRG1		Ear, Nose, Throat
C1834055	Thin hypoplastic alae nasi	FLNB		Ear, Nose, Throat
C1834055	Thin hypoplastic alae nasi	HNRNPK		Ear, Nose, Throat
C1842138	Progressive hearing loss	SERPINB6		Ear, Nose, Throat
C1843156	Hearing loss, progressive sensorineural	IARS2		Ear, Nose, Throat
C1855285	Protruding ears	KIF11		Ear, Nose, Throat
C3150704	DEAFNESS, AUTOSOMAL RECESSIVE 91	SERPINB6	613453	Ear, Nose, Throat
C4021806	Prelingual sensorineural hearing impairment	IARS2		Ear, Nose, Throat
C4023383	Narrow internal auditory canal	TCOF1		Ear, Nose, Throat
C4025750	Abnormality of the nasopharynx	MATR3		Ear, Nose, Throat
C4025860	Hearing abnormality	IKBKG		Ear, Nose, Throat
C4280333	Recurrent sinus disease	NFKB2		Ear, Nose, Throat
C0003028	Anhidrosis	KIF1A		Endocrine
C0020676	Hypothyroidism	SQSTM1		Endocrine
C0241011	Low serum estradiol levels	CTDP1		Endocrine
C0271623	Hypogonadotropic hypogonadism	CTDP1		Endocrine
C0948896	Primary hypogonadism	CTDP1		Endocrine
C1836623	Low to undetectable plasma cortisol	NFKB2		Endocrine
C3489396	Hypogonadism, Isolated Hypogonadotropic	CTDP1	146110	Endocrine
C3714796	Isolated somatotropin deficiency	FLNB		Endocrine
C3714796	Isolated somatotropin deficiency	IARS2		Endocrine
C4023211	Adrenocorticotropin deficient adrenal insufficiency	NFKB2		Endocrine
C4025669	Decreased circulating ACTH level	NFKB2		Endocrine
C0009806	Constipation	HNRNPK		Gastrointestinal
C0009806	Constipation	PCCA		Gastrointestinal
C0011168	Deglutition Disorders	FTL		Gastrointestinal
C0011168	Deglutition Disorders	MATR3		Gastrointestinal
C0011168	Deglutition Disorders	OPTN		Gastrointestinal
C0011168	Deglutition Disorders	SQSTM1		Gastrointestinal
C0014848	Esophageal Achalasia	IARS2		Gastrointestinal
C0017168	Gastroesophageal reflux disease	KIF1A	109350	Gastrointestinal
C0018834	Heartburn	KIF1A		Gastrointestinal
C0023075	Laryngostenosis	FLNB		Gastrointestinal
C0042963	Vomiting	CPS1		Gastrointestinal
C0042963	Vomiting	PCCA		Gastrointestinal
C0237326	Dyschezia	HNRNPK		Gastrointestinal
C0237326	Dyschezia	PCCA		Gastrointestinal
C0520459	Necrotizing Enterocolitis	ENO1		Gastrointestinal
C0002871	Anemia	PCCA		Hematological
C0002878	Anemia, Hemolytic	NFKB2		Hematological
C0014457	Eosinophilia	IKBKG		Hematological
C0020625	Hyponatremia	NFKB2	613508	Hematological
C0024236	Lymphedema	IKBKG		Hematological
C0024236	Lymphedema	KIF11		Hematological
C0024312	Lymphopenia	NFKB2		Hematological
C0030312	Pancytopenia	PCCA		Hematological
C0040034	Thrombocytopenia	ACTN1		Hematological
C0040034	Thrombocytopenia	PCCA		Hematological
C0085649	Peripheral edema	KIF1A		Hematological
C0086438	Hypogammaglobulinemia	NFKB2		Hematological
C0162119	Hemoglobin low	PCCA		Hematological
C0162285	Edema of eyelid	KIF1A		Hematological
C0221278	Anisocytosis	ACTN1		Hematological
C0235886	Leg edema	KIF1A		Hematological
C0239340	Edema of lower extremity	KIF1A		Hematological
C0240278	Lymphatic obstruction	IKBKG		Hematological
C0240278	Lymphatic obstruction	KIF11		Hematological
C0241012	Serum ferritin decreased	FTL		Hematological
C0241013	Serum ferritin increased	FTL		Hematological
C0242584	Autoimmune thrombocytopenia	NFKB2		Hematological
C0392386	Decreased platelet count	ACTN1		Hematological
C0392386	Decreased platelet count	PCCA		Hematological
C0497156	Lymphadenopathy	NFKB2		Hematological
C0743912	Increased ferritin	FTL		Hematological
C0853697	Neutrophil count decreased	PCCA		Hematological
C0920163	Idiopathic thrombocytopenia	NFKB2		Hematological
C1096367	Increased mean platelet volume	ACTN1		Hematological
C1835229	Onset of lymphedema around puberty	IKBKG		Hematological
C1835229	Onset of lymphedema around puberty	KIF11		Hematological
C1835265	Lymphedema, microcephaly and chorioretinopathy syndrome	KIF11	152950	Hematological
C1839532	Low plasma citrulline	CPS1		Hematological
C1861195	Glanzmann Thrombasthenia, Autosomal Dominant	ACTN1	187800	Hematological
C3554663	BLEEDING DISORDER, PLATELET-TYPE, 15	ACTN1	615193	Hematological
C3810090	L-FERRITIN DEFICIENCY	FTL	615604	Hematological
C3854388	Hyperferritinaemia	FTL		Hematological
C4024927	Peripheral hypomyelination	CTDP1		Hematological
C0009447	Common Variable Immunodeficiency	NFKB2	607594	Immunological
C0013374	Dysgammaglobulinemia	IKBKG		Immunological
C0021051	Immunologic Deficiency Syndromes	IKBKG		Immunological
C0021051	Immunologic Deficiency Syndromes	NFKB2		Immunological
C0021368	Inflammation	PLAA		Immunological
C0030305	Pancreatitis	PCCA		Immunological
C0030578	Paronychia Inflammation	KIF1A		Immunological
C0162538	Immunoglobulin A deficiency (disorder)	IKBKG		Immunological
C0162539	IgG Deficiency	IKBKG		Immunological
C0221237	Angular cheilitis	CAST		Immunological
C0239998	Recurrent infections	IKBKG		Immunological
C0376618	Endotoxemia	CPS1		Immunological
C0398650	Immune thrombocytopenic purpura	NFKB2	188030	Immunological
C0694550	Recurrent pneumonia	NFKB2		Immunological
C1737260	Recurrent mycobacterium avium complex infections	IKBKG		Immunological
C1839972	Increased IgM levels	IKBKG		Immunological
C1844383	Recurrent bacterial infection	IKBKG		Immunological
C1845117	Immunodeficiency without anhidrotic ectodermal dysplasia	IKBKG	300584	Immunological
C1863715	Absent B cells	NFKB2		Immunological
C2169794	Recurrent streptococcus pneumoniae infections	IKBKG		Immunological
C2748958	Increased susceptibility to bacterial infections	IKBKG		Immunological
C3809991	IMMUNODEFICIENCY, COMMON VARIABLE, 10	NFKB2	615577	Immunological
C4020824	Absence of B cells	NFKB2		Immunological
C4020846	Prone to bacterial infection	IKBKG		Immunological
C4023027	Abnormality of cells of the lymphoid lineage	NFKB2		Immunological
C4023616	Abnormality of immune system physiology	PCCA		Immunological
C4025672	Impaired memory B-cell generation	IKBKG		Immunological
C4048270	Decreased antibody level in blood	NFKB2		Immunological
C0001125	Acidosis, Lactic	PCCA		Metabolic
C0011849	Diabetes Mellitus	KIF1A		Metabolic
C0012715	Iron Metabolism Disorders	FTL		Metabolic
C0019209	Hepatomegaly	MFN2		Metabolic
C0019209	Hepatomegaly	PCCA		Metabolic
C0020615	Hypoglycemia	CTDP1		Metabolic
C0020615	Hypoglycemia	PCCA		Metabolic
C0021655	Insulin Resistance	MFN2	147670	Metabolic
C0023893	Liver Cirrhosis, Experimental	ACTN1		Metabolic
C0023893	Liver Cirrhosis, Experimental	ALDH1L2		Metabolic
C0023893	Liver Cirrhosis, Experimental	BICD2		Metabolic
C0023893	Liver Cirrhosis, Experimental	CPS1		Metabolic
C0023893	Liver Cirrhosis, Experimental	LRRFIP1		Metabolic
C0023893	Liver Cirrhosis, Experimental	NBEA		Metabolic
C0023893	Liver Cirrhosis, Experimental	NDRG1		Metabolic
C0023893	Liver Cirrhosis, Experimental	PTER		Metabolic
C0023893	Liver Cirrhosis, Experimental	TPM4		Metabolic
C0023893	Liver Cirrhosis, Experimental	ZFYVE16		Metabolic
C0023895	Liver diseases	JUP		Metabolic
C0086565	Liver Dysfunction	NFKB2		Metabolic
C0151766	Liver function tests abnormal finding	NFKB2		Metabolic
C0162557	Liver Failure, Acute	CAST		Metabolic
C0220981	Metabolic acidosis	PCCA		Metabolic
C0220994	Hyperammonemia	CPS1		Metabolic
C0220994	Hyperammonemia	PCCA		Metabolic
C0235996	Hepatic enzyme increased	NFKB2		Metabolic
C0241775	Organic aciduria	PCCA		Metabolic
C0268119	Combined molybdoflavoprotein enzyme deficiency	GPHN	252150	Metabolic
C0268559	Hyperglycinemia	GLDC		Metabolic
C0268559	Hyperglycinemia	PCCA		Metabolic
C0268579	Propionic acidemia	PCCA	606054	Metabolic
C0268583	Methylmalonic acidemia	HCFC1		Metabolic
C0268631	succinic semialdehyde dehydrogenase deficiency	ALDH5A1	271980	Metabolic
C0271708	Fasting Hypoglycemia	IARS2		Metabolic
C0311298	Propionic acidemia, type II	PCCA		Metabolic
C0341706	Glycinuria	GLDC		Metabolic
C0341706	Glycinuria	PCCA		Metabolic
C0347959	Lactic acidemia	PCCA		Metabolic
C0400966	Non-alcoholic Fatty Liver Disease	IKBKG		Metabolic
C0438237	Liver enzymes abnormal	NFKB2		Metabolic
C0438717	Transaminases increased	NFKB2		Metabolic
C0543541	HYPERGLYCINURIA (disorder)	GLDC	138500,608893,608331	Metabolic
C0543541	HYPERGLYCINURIA (disorder)	PCCA	138500,608893,608331	Metabolic
C0750857	Alkaline phosphatase serum increased	SQSTM1		Metabolic
C0751748	Nonketotic Hyperglycinemia	GLDC	605899	Metabolic
C0751753	Carbamoyl-Phosphate Synthase I Deficiency Disease	CPS1	237300	Metabolic
C0877359	Liver function test increased	NFKB2		Metabolic
C0948585	Hydroxyprolinuria	SQSTM1		Metabolic
C1842003	Subclinical abnormal liver function tests	NFKB2		Metabolic
C1846288	Recurrent hypoglycemia	NFKB2		Metabolic
C1854990	Molybdenum Cofactor Deficiency, Complementation Group C	GPHN	615501	Metabolic
C1855119	Methylmalonic aciduria	HCFC1		Metabolic
C1859735	Arginine deficiency	CPS1		Metabolic
C4020843	Abnormal urinary amino-acid findings	CPS1		Metabolic
C4021768	Abnormality of metabolism/homeostasis	ALDH5A1		Metabolic
C4021768	Abnormality of metabolism/homeostasis	FTL		Metabolic
C4021768	Abnormality of metabolism/homeostasis	KIF1A		Metabolic
C4025095	Hypoargininemia	CPS1		Metabolic
C4082171	Hyperammonemia Due to Carbamoyl Phosphate Synthetase 1 Deficiency	CPS1	237300	Metabolic
C4277682	Chemical and Drug Induced Liver Injury	ENO1		Metabolic
C4277682	Chemical and Drug Induced Liver Injury	GSTM2		Metabolic
C0013144	Drowsiness	KIF1A		multiple
C0015672	Fatigue	MATR3		multiple
C0015672	Fatigue	NFKB2		multiple
C0015672	Fatigue	OPTN		multiple
C0015672	Fatigue	SQSTM1		multiple
C0020617	Hypoglycemic coma	NFKB2		multiple
C0021171	Bloch Sulzberger syndrome	IKBKG	308300,300248	multiple
C0027540	Necrosis	CAST		multiple
C0151576	Elevated creatine kinase	DNM2		multiple
C0151576	Elevated creatine kinase	FLNC		multiple
C0151576	Elevated creatine kinase	MATR3		multiple
C0231687	Spastic gait	KIF1A		multiple
C0231688	Gait, Shuffling	KDM5C		multiple
C0265339	Borjeson-Forssman-Lehmann syndrome	PHF6	301900	multiple
C0376634	Craniofacial Abnormalities	TCOF1		multiple
C0424585	Tires quickly	DNM2		multiple
C0427149	Gait, Drop Foot	MFN2		multiple
C0427149	Gait, Drop Foot	SQSTM1		multiple
C0432201	Boomerang dysplasia	FLNB	112310	multiple
C0575081	Gait abnormality	FTL		multiple
C0575081	Gait abnormality	IKBKG		multiple
C0575081	Gait abnormality	MFN2		multiple
C0575081	Gait abnormality	NDRG1		multiple
C0796122	Progressive encephalopathy with edema, hypsarrhythmia and optic atrophy syndrome	KIF1A		multiple
C0850703	Frequent falls	GPHN		multiple
C1832600	Naxos disease	JUP	601214	multiple
C1845073	INVASIVE PNEUMOCOCCAL DISEASE, RECURRENT ISOLATED, 2 (disorder)	IKBKG	300640	multiple
C1845919	Ectodermal Dysplasia, Anhidrotic, with Immunodeficiency, Osteopetrosis, and Lymphedema	IKBKG	300301	multiple
C1848701	Elevated hepatic transaminases	NFKB2		multiple
C1851102	Fibrosis Of Extraocular Muscles, Congenital, 1	TUBB3	135700	multiple
C1864985	Progressive disorder	FTL		multiple
C1864985	Progressive disorder	KIF1A		multiple
C1864985	Progressive disorder	SQSTM1		multiple
C1970879	ATYPICAL MYCOBACTERIOSIS, FAMILIAL, X-LINKED 1 (disorder)	IKBKG	300636	multiple
C2931817	Chromosome 2q37 deletion syndrome	PASK	600430	multiple
C3279793	COMBINED OXIDATIVE PHOSPHORYLATION DEFICIENCY 8	AARS2	614096	multiple
C3280309	ARTHROGRYPOSIS, PERTHES DISEASE, AND UPWARD GAZE PALSY	NEK9	614262	multiple
C3806467	Respiratory insufficiency due to muscle weakness	MATR3		multiple
C3807306	Rhabdomyolysis, acute	CTDP1		multiple
C3809272	LETHAL CONGENITAL CONTRACTURE SYNDROME 5	DNM2	615368	multiple
C4014942	CATARACTS, GROWTH HORMONE DEFICIENCY, SENSORY NEUROPATHY, SENSORINEURAL HEARING LOSS, AND SKELETAL DYSPLASIA	IARS2	616007	multiple
C4015701	MECKEL SYNDROME 12	KIF14	616258	multiple
C0013421	Dystonia	FTL		Muscular
C0013421	Dystonia	PCCA		Muscular
C0026826	Muscle Hypertonia	GPHN		Muscular
C0026827	Muscle hypotonia	ALDH5A1		Muscular
C0026827	Muscle hypotonia	CBL		Muscular
C0026827	Muscle hypotonia	CPS1		Muscular
C0026827	Muscle hypotonia	DNM2		Muscular
C0026827	Muscle hypotonia	GLDC		Muscular
C0026827	Muscle hypotonia	HCFC1		Muscular
C0026827	Muscle hypotonia	HNRNPK		Muscular
C0026827	Muscle hypotonia	KIF1A		Muscular
C0026827	Muscle hypotonia	SPTAN1		Muscular
C0026837	Muscle Rigidity	FTL		Muscular
C0026847	Spinal Muscular Atrophy	BICD2		Muscular
C0026848	Myopathy	FLNC		Muscular
C0085684	Foot-drop	MFN2		Muscular
C0085684	Foot-drop	SQSTM1		Muscular
C0086439	Hypokinesia	GPHN		Muscular
C0151786	Muscle Weakness	FLNC		Muscular
C0151786	Muscle Weakness	OPTN		Muscular
C0221629	Proximal muscle weakness	DNM2		Muscular
C0221629	Proximal muscle weakness	FLNC		Muscular
C0221629	Proximal muscle weakness	MFN2		Muscular
C0234182	Gowers sign	BICD2		Muscular
C0234958	muscle degeneration	KIF1A		Muscular
C0234958	muscle degeneration	MATR3		Muscular
C0234958	muscle degeneration	OPTN		Muscular
C0234958	muscle degeneration	SQSTM1		Muscular
C0239548	Fasciculation, Tongue	OPTN		Muscular
C0241005	Creatine phosphokinase serum increased	DNM2	601253,123320	Muscular
C0241005	Creatine phosphokinase serum increased	FLNC	601253,123320	Muscular
C0241005	Creatine phosphokinase serum increased	MATR3	601253,123320	Muscular
C0271683	Polyneuropathy, Motor	CTDP1		Muscular
C0393593	Dystonia Disorders	ALDH5A1		Muscular
C0427063	Shoulder girdle weakness	MATR3		Muscular
C0427063	Shoulder girdle weakness	SQSTM1		Muscular
C0427065	Distal muscle weakness	DNM2		Muscular
C0427065	Distal muscle weakness	MATR3		Muscular
C0427065	Distal muscle weakness	MFN2		Muscular
C0427065	Distal muscle weakness	NDRG1		Muscular
C0427068	Monoparesis - leg	KIF1A		Muscular
C0429349	EMG positive sharp waves	SQSTM1		Muscular
C0522224	Paralysed	MATR3		Muscular
C0522224	Paralysed	OPTN		Muscular
C0522224	Paralysed	SQSTM1		Muscular
C0541794	Skeletal muscle atrophy	KIF1A		Muscular
C0541794	Skeletal muscle atrophy	MATR3		Muscular
C0541794	Skeletal muscle atrophy	OPTN		Muscular
C0541794	Skeletal muscle atrophy	SQSTM1		Muscular
C0575071	Gowers sign present	BICD2		Muscular
C0587246	Muscle weakness of limb	MFN2		Muscular
C0746674	Generalized muscle weakness	MATR3		Muscular
C0746674	Generalized muscle weakness	OPTN		Muscular
C0746674	Generalized muscle weakness	SQSTM1		Muscular
C0748691	Shoulder weakness	MATR3		Muscular
C0748691	Shoulder weakness	SQSTM1		Muscular
C0751336	Distal Muscular Dystrophies	MATR3		Muscular
C0752282	Congenital Structural Myopathy	DNM2		Muscular
C1271100	Lower limb spasticity	KIF1A		Muscular
C1834558	Myopathy, Centronuclear, Autosomal Dominant	DNM2	160150	Muscular
C1836050	Filaminopathy, autosomal dominant	FLNC	609524	Muscular
C1836057	Muscle fiber splitting	FLNC		Muscular
C1836296	Weakness of lower limb	KIF1A		Muscular
C1836451	Muscle atrophy, lower limb, distal	FLNC		Muscular
C1836451	Muscle atrophy, lower limb, distal	KDM5C		Muscular
C1838391	Limb hypertonia	PCCA		Muscular
C1839630	Hypotonia, severe	KIF1A		Muscular
C1842170	Centrally nucleated skeletal muscle fibers	DNM2		Muscular
C1843663	Sphincter disturbances	KIF1A		Muscular
C1843697	Axial muscle weakness	BICD2		Muscular
C1843700	Variation in muscle fiber size	SQSTM1		Muscular
C1845245	Lower limb hypertonia	KDM5C		Muscular
C1848736	Distal amyotrophy	DNM2		Muscular
C1848736	Distal amyotrophy	MFN2		Muscular
C1848736	Distal amyotrophy	NDRG1		Muscular
C1850309	Mildly increased creatine kinase	FLNC		Muscular
C1850309	Mildly increased creatine kinase	SQSTM1		Muscular
C1853723	MYOPATHY, DISTAL 2	MATR3		Muscular
C1853743	Axial hypotonia	GPHN		Muscular
C1853743	Axial hypotonia	PCCA		Muscular
C1853743	Axial hypotonia	TUBB3		Muscular
C1853926	NONAKA MYOPATHY	SQSTM1	605820	Muscular
C1853932	Rimmed vacuoles on biopsy	MATR3		Muscular
C1853932	Rimmed vacuoles on biopsy	SQSTM1		Muscular
C1866141	Foot dorsiflexor weakness	MFN2		Muscular
C1866141	Foot dorsiflexor weakness	SQSTM1		Muscular
C1866863	Lower limb atrophy	FLNC		Muscular
C1866863	Lower limb atrophy	KDM5C		Muscular
C2678065	Myofibrillar Myopathy	FLNC		Muscular
C3279722	MYOPATHY, DISTAL, 4	FLNC	614065	Muscular
C3806644	Lower limb muscle hypotrophy	FLNC		Muscular
C3806644	Lower limb muscle hypotrophy	KDM5C		Muscular
C3809049	SPINAL MUSCULAR ATROPHY, LOWER EXTREMITY-PREDOMINANT, 2, AUTOSOMAL DOMINANT	BICD2	615290	Muscular
C4014605	POLYGLUCOSAN BODY MYOPATHY 1 WITH OR WITHOUT IMMUNODEFICIENCY	RNF31	615895	Muscular
C4020871	Dystonic disease	FTL		Muscular
C4020871	Dystonic disease	PCCA		Muscular
C4021082	Fatty replacement of skeletal muscle	SQSTM1		Muscular
C4021581	Distal upper limb amyotrophy	FLNC		Muscular
C4022157	Muscle fiber cytoplasmatic inclusion bodies	FLNC		Muscular
C4022587	Fatigable weakness of respiratory muscles	MATR3		Muscular
C4022587	Fatigable weakness of respiratory muscles	OPTN		Muscular
C4022587	Fatigable weakness of respiratory muscles	SQSTM1		Muscular
C4022588	Fatigable weakness of swallowing muscles	MATR3		Muscular
C4022588	Fatigable weakness of swallowing muscles	OPTN		Muscular
C4022588	Fatigable weakness of swallowing muscles	SQSTM1		Muscular
C4024612	Tibialis muscle weakness	SQSTM1		Muscular
C0002395	Alzheimer's Disease	ENO1	104300	Neurological
C0002395	Alzheimer's Disease	LRP1	104300	Neurological
C0002736	Amyotrophic Lateral Sclerosis	MATR3		Neurological
C0002736	Amyotrophic Lateral Sclerosis	OPTN		Neurological
C0002736	Amyotrophic Lateral Sclerosis	SQSTM1		Neurological
C0003862	Arthralgia	MFN2		Neurological
C0006112	Brain Diseases, Metabolic	ALDH5A1		Neurological
C0006114	Cerebral Edema	CPS1		Neurological
C0007758	Cerebellar Ataxia	ALDH5A1		Neurological
C0007758	Cerebellar Ataxia	CPS1		Neurological
C0007758	Cerebellar Ataxia	CTDP1		Neurological
C0007758	Cerebellar Ataxia	FTL		Neurological
C0008489	Chorea	CTDP1		Neurological
C0008489	Chorea	FTL		Neurological
C0009421	Comatose	CPS1		Neurological
C0009421	Comatose	PCCA		Neurological
C0014544	Epilepsy	CPS1		Neurological
C0014544	Epilepsy	GLDC		Neurological
C0014544	Epilepsy	GPHN		Neurological
C0014544	Epilepsy	IKBKG		Neurological
C0014544	Epilepsy	KDM5C		Neurological
C0014544	Epilepsy	PCCA		Neurological
C0014544	Epilepsy	SPTAN1		Neurological
C0014550	Epilepsies, Myoclonic	ALDH5A1		Neurological
C0014553	Absence Epilepsy	ALDH5A1		Neurological
C0015644	Muscular fasciculation	SQSTM1		Neurological
C0020255	Hydrocephalus	KIF1A		Neurological
C0023380	Lethargy	CPS1		Neurological
C0023380	Lethargy	GLDC		Neurological
C0023380	Lethargy	PCCA		Neurological
C0023882	Little's Disease	FTL		Neurological
C0026650	Movement Disorders	KIF1A		Neurological
C0026821	Muscle Cramp	MATR3		Neurological
C0026821	Muscle Cramp	OPTN		Neurological
C0026821	Muscle Cramp	SQSTM1		Neurological
C0026838	Muscle Spasticity	FTL		Neurological
C0026838	Muscle Spasticity	IKBKG		Neurological
C0026838	Muscle Spasticity	KDM5C		Neurological
C0026838	Muscle Spasticity	MATR3		Neurological
C0026838	Muscle Spasticity	OPTN		Neurological
C0026838	Muscle Spasticity	SQSTM1		Neurological
C0026838	Muscle Spasticity	TUBB3		Neurological
C0027066	Myoclonus	GLDC		Neurological
C0027066	Myoclonus	GPHN		Neurological
C0027746	Nerve Degeneration	FTL		Neurological
C0027746	Nerve Degeneration	MATR3		Neurological
C0027746	Nerve Degeneration	OPTN		Neurological
C0027746	Nerve Degeneration	SQSTM1		Neurological
C0030193	Pain	MATR3		Neurological
C0030193	Pain	MFN2		Neurological
C0030193	Pain	OPTN		Neurological
C0030193	Pain	SQSTM1		Neurological
C0030554	Paresthesia	CTDP1		Neurological
C0030554	Paresthesia	MFN2		Neurological
C0031117	Peripheral Neuropathy	FLNC		Neurological
C0031117	Peripheral Neuropathy	IARS2		Neurological
C0031117	Peripheral Neuropathy	KIF1A		Neurological
C0036572	Seizures	CPS1		Neurological
C0036572	Seizures	GLDC		Neurological
C0036572	Seizures	GPHN		Neurological
C0036572	Seizures	IKBKG		Neurological
C0036572	Seizures	KDM5C		Neurological
C0036572	Seizures	PCCA		Neurological
C0036572	Seizures	SPTAN1		Neurological
C0037763	Spasm	ALDH5A1		Neurological
C0037772	Spastic Paraplegia	KIF1A		Neurological
C0037773	Spastic Paraplegia, Hereditary	MFN2	600361	Neurological
C0037926	Compression of spinal cord	FLNB		Neurological
C0038220	Status Epilepticus	ALDH5A1		Neurological
C0039070	Syncope	JUP		Neurological
C0040822	Tremor	FTL		Neurological
C0042571	Vertigo	JUP		Neurological
C0085584	Encephalopathies	GLDC		Neurological
C0149931	Migraine Disorders	LRP1	157300	Neurological
C0151311	Cranial nerve palsies	SQSTM1		Neurological
C0151313	Sensory neuropathy	IARS2		Neurological
C0151611	Electroencephalogram abnormal	ALDH5A1		Neurological
C0151825	Bone pain	SQSTM1		Neurological
C0151889	Hyperreflexia	FTL	145290	Neurological
C0151889	Hyperreflexia	GLDC	145290	Neurological
C0151889	Hyperreflexia	GPHN	145290	Neurological
C0151889	Hyperreflexia	KDM5C	145290	Neurological
C0151889	Hyperreflexia	KIF1A	145290	Neurological
C0151889	Hyperreflexia	MATR3	145290	Neurological
C0151889	Hyperreflexia	SPTAN1	145290	Neurological
C0151889	Hyperreflexia	SQSTM1	145290	Neurological
C0151934	Hypogeusia	KIF1A		Neurological
C0154671	Degenerative brain disorder	CTDP1		Neurological
C0154671	Degenerative brain disorder	PCCA		Neurological
C0154671	Degenerative brain disorder	SPTAN1		Neurological
C0154676	Organic writer's cramp	FTL		Neurological
C0175754	Agenesis of corpus callosum	GLDC	217990	Neurological
C0175754	Agenesis of corpus callosum	KIF14	217990	Neurological
C0175754	Agenesis of corpus callosum	TUBB3	217990	Neurological
C0221166	Paraparesis	SQSTM1		Neurological
C0231712	Waddling gait	BICD2		Neurological
C0231712	Waddling gait	FLNC		Neurological
C0233565	Bradykinesia	FTL		Neurological
C0234146	Absent reflex	BICD2		Neurological
C0234146	Absent reflex	DNM2		Neurological
C0234146	Absent reflex	KIF1A		Neurological
C0234146	Absent reflex	MFN2		Neurological
C0234146	Absent reflex	NDRG1		Neurological
C0234162	Cerebellar Dysmetria	CTDP1		Neurological
C0234162	Cerebellar Dysmetria	KIF1A		Neurological
C0234166	Hyperexplexia	GPHN		Neurological
C0234376	Action Tremor	CTDP1		Neurological
C0235025	Peripheral motor neuropathy	CTDP1		Neurological
C0235153	Hallucinations, Sensory	ALDH5A1		Neurological
C0235946	Cerebral atrophy	CTDP1		Neurological
C0235946	Cerebral atrophy	KIF1A		Neurological
C0235946	Cerebral atrophy	PCCA		Neurological
C0235946	Cerebral atrophy	SPTAN1		Neurological
C0235946	Cerebral atrophy	SQSTM1		Neurological
C0240914	Romberg's sign positive	MFN2		Neurological
C0241772	Reflex, Deep Tendon, Absent	BICD2		Neurological
C0241772	Reflex, Deep Tendon, Absent	DNM2		Neurological
C0241772	Reflex, Deep Tendon, Absent	KIF1A		Neurological
C0241772	Reflex, Deep Tendon, Absent	MFN2		Neurological
C0241772	Reflex, Deep Tendon, Absent	NDRG1		Neurological
C0242422	Parkinsonian Disorders	FTL		Neurological
C0262404	Cerebellar degeneration	KIF1A		Neurological
C0262404	Cerebellar degeneration	SPTAN1		Neurological
C0266464	Polymicrogyria	GPHN		Neurological
C0266464	Polymicrogyria	TUBB3		Neurological
C0266470	Cerebellar Hypoplasia	KIF14	213000	Neurological
C0270680	Posterior fossa compression syndrome	SQSTM1		Neurological
C0270790	Quadriparesis	SQSTM1		Neurological
C0270914	Hereditary Motor and Sensory-Neuropathy Type II	KIF1A		Neurological
C0270921	Axonal neuropathy	KIF1A		Neurological
C0270948	Neurogenic Muscular Atrophy	KIF1A		Neurological
C0270948	Neurogenic Muscular Atrophy	MATR3		Neurological
C0270948	Neurogenic Muscular Atrophy	OPTN		Neurological
C0270948	Neurogenic Muscular Atrophy	SQSTM1		Neurological
C0278124	Absent tendon reflex	BICD2		Neurological
C0278124	Absent tendon reflex	DNM2		Neurological
C0278124	Absent tendon reflex	KIF1A		Neurological
C0278124	Absent tendon reflex	MFN2		Neurological
C0278124	Absent tendon reflex	NDRG1		Neurological
C0338451	Frontotemporal dementia	SQSTM1	600274	Neurological
C0338480	Common Migraine	LRP1		Neurological
C0344482	Hypoplasia of corpus callosum	SPTAN1		Neurological
C0344482	Hypoplasia of corpus callosum	TUBB3		Neurological
C0376175	Bell Palsy	DNM2		Neurological
C0393807	Hereditary motor and sensory neuropathy with optic atrophy (disorder)	MFN2	601152,608507	Neurological
C0426970	Spastic Quadriplegia	SPTAN1		Neurological
C0427055	Facial Paresis	DNM2		Neurological
C0431380	Cortical Dysplasia	TUBB3		Neurological
C0442874	Neuropathy	IARS2		Neurological
C0442874	Neuropathy	KIF1A		Neurological
C0494475	Tonic - clonic seizures	ALDH5A1		Neurological
C0494475	Tonic - clonic seizures	GPHN		Neurological
C0497327	Dementia	FTL		Neurological
C0522214	Abnormal visual evoked potential	MFN2		Neurological
C0522214	Abnormal visual evoked potential	NDRG1		Neurological
C0522216	Abnormal auditory evoked potential	NDRG1		Neurological
C0524851	Neurodegenerative Disorders	FTL		Neurological
C0524851	Neurodegenerative Disorders	GSTM2		Neurological
C0524851	Neurodegenerative Disorders	MATR3		Neurological
C0524851	Neurodegenerative Disorders	OPTN		Neurological
C0524851	Neurodegenerative Disorders	SPTAN1		Neurological
C0524851	Neurodegenerative Disorders	SQSTM1		Neurological
C0543888	Epileptic encephalopathy	SPTAN1		Neurological
C0544820	Hypomyelination	SPTAN1		Neurological
C0558845	Reflex, Ankle, Absent	SQSTM1		Neurological
C0684276	Hypsarrhythmia	HCFC1		Neurological
C0684276	Hypsarrhythmia	KIF1A		Neurological
C0684276	Hypsarrhythmia	SPTAN1		Neurological
C0700078	Decreased tendon reflex	ALDH5A1		Neurological
C0700078	Decreased tendon reflex	BICD2		Neurological
C0700078	Decreased tendon reflex	DNM2		Neurological
C0700078	Decreased tendon reflex	FLNC		Neurological
C0700078	Decreased tendon reflex	IARS2		Neurological
C0700078	Decreased tendon reflex	KIF1A		Neurological
C0700078	Decreased tendon reflex	MFN2		Neurological
C0700078	Decreased tendon reflex	NDRG1		Neurological
C0700078	Decreased tendon reflex	SQSTM1		Neurological
C0700208	Acquired scoliosis	FLNB		Neurological
C0700208	Acquired scoliosis	HNRNPK		Neurological
C0700208	Acquired scoliosis	IARS2		Neurological
C0700208	Acquired scoliosis	IKBKG		Neurological
C0700208	Acquired scoliosis	MFN2		Neurological
C0740279	Atrophy of cerebellum	KIF1A		Neurological
C0740279	Atrophy of cerebellum	SPTAN1		Neurological
C0751295	Memory Loss	SQSTM1		Neurological
C0751778	Myoclonic Epilepsies, Progressive	ALDH5A1	310370	Neurological
C0751870	Heredodegenerative Disorders, Nervous System	FTL		Neurological
C0878575	Peripheral demyelination	CTDP1		Neurological
C0948163	Leukoaraiosis	SQSTM1		Neurological
C1112256	Peripheral sensorimotor neuropathy	IARS2		Neurological
C1263857	Peripheral axonal neuropathy	KIF1A		Neurological
C1301959	Bulbar weakness	MATR3		Neurological
C1301959	Bulbar weakness	SQSTM1		Neurological
C1306587	Acute encephalopathy	PCCA		Neurological
C1527311	Brain Edema	CPS1		Neurological
C1832334	CHARCOT-MARIE-TOOTH DISEASE, TYPE 4D	NDRG1	601455	Neurological
C1832338	Axonal loss	NDRG1		Neurological
C1832339	Intraaxonal accumulation of curvilinear profiles	NDRG1		Neurological
C1835614	Hereditary Hyperexplexia	GPHN	149400	Neurological
C1835896	SPASTIC PARAPLEGIA 30, AUTOSOMAL RECESSIVE (disorder)	KIF1A	610357	Neurological
C1836485	CHARCOT-MARIE-TOOTH DISEASE, AXONAL, TYPE 2A2 (disorder)	MFN2	609260,608507	Neurological
C1836527	Distal sensory impairment of all modalities	MFN2		Neurological
C1836696	Lower limb hyperreflexia	KDM5C		Neurological
C1836743	AUDITORY NEUROPATHY, AUTOSOMAL DOMINANT, 1	DIAPH3	609129	Neurological
C1837496	Axonal degeneration	DNM2		Neurological
C1838320	Hyperorality	SQSTM1		Neurological
C1838869	Proximal neurogenic muscle weakness	DNM2		Neurological
C1838869	Proximal neurogenic muscle weakness	FLNC		Neurological
C1838869	Proximal neurogenic muscle weakness	MFN2		Neurological
C1842688	Hypoplasia of the brainstem	TUBB3		Neurological
C1843077	Segmental demyelination/remyelination	DNM2		Neurological
C1843077	Segmental demyelination/remyelination	NDRG1		Neurological
C1843479	Neurogenic muscle atrophy, especially in the lower limbs	KIF1A		Neurological
C1843479	Neurogenic muscle atrophy, especially in the lower limbs	MATR3		Neurological
C1843479	Neurogenic muscle atrophy, especially in the lower limbs	OPTN		Neurological
C1843479	Neurogenic muscle atrophy, especially in the lower limbs	SQSTM1		Neurological
C1844925	Narrow cervical spinal canal	IARS2		Neurological
C1846149	Progressive mental retardation	KDM5C		Neurological
C1847584	Distal sensory impairment	DNM2		Neurological
C1847584	Distal sensory impairment	IARS2		Neurological
C1847584	Distal sensory impairment	MFN2		Neurological
C1847584	Distal sensory impairment	NDRG1		Neurological
C1847902	CHARCOT-MARIE-TOOTH DISEASE, DOMINANT INTERMEDIATE B (disorder)	DNM2	606482	Neurological
C1847906	Onion bulb formation	DNM2		Neurological
C1847906	Onion bulb formation	MFN2		Neurological
C1847906	Onion bulb formation	NDRG1		Neurological
C1847967	OVARIOLEUKODYSTROPHY	AARS2	603896,606454,603945	Neurological
C1849148	Decreased sensory nerve conduction velocities (NCV)	KIF1A		Neurological
C1850055	PEHO syndrome	KIF1A	260565	Neurological
C1850456	Progressive microcephaly	SPTAN1		Neurological
C1853578	Neuroferritinopathy	FTL	606159	Neurological
C1854570	Distal motor neuropathy	CTDP1		Neurological
C1855330	Cerebral hypoplasia	KIF14		Neurological
C1855483	Progressive spastic paraplegia	KDM5C		Neurological
C1856507	Bulbar signs	MATR3		Neurological
C1857640	Decreased nerve conduction velocity	KIF1A		Neurological
C1857640	Decreased nerve conduction velocity	MATR3		Neurological
C1857640	Decreased nerve conduction velocity	NDRG1		Neurological
C1858285	Decreased number of large and small myelinated fibers	DNM2		Neurological
C1858285	Decreased number of large and small myelinated fibers	KIF1A		Neurological
C1858285	Decreased number of large and small myelinated fibers	MFN2		Neurological
C1858729	Decreased motor NCV	CTDP1		Neurological
C1858729	Decreased motor NCV	MFN2		Neurological
C1858991	Childhood Ataxia with Central Nervous System Hypomyelinization	AARS2	603896	Neurological
C1864696	Distal limb muscle weakness due to peripheral neuropathy	DNM2		Neurological
C1864696	Distal limb muscle weakness due to peripheral neuropathy	MATR3		Neurological
C1864696	Distal limb muscle weakness due to peripheral neuropathy	MFN2		Neurological
C1864696	Distal limb muscle weakness due to peripheral neuropathy	NDRG1		Neurological
C1864897	Cognitive delay	ALDH5A1		Neurological
C1864897	Cognitive delay	CBL		Neurological
C1864897	Cognitive delay	CPS1		Neurological
C1864897	Cognitive delay	CTDP1		Neurological
C1864897	Cognitive delay	HNRNPK		Neurological
C1864897	Cognitive delay	KIF1A		Neurological
C1864897	Cognitive delay	PCCA		Neurological
C1864897	Cognitive delay	TUBB3		Neurological
C1865412	Abnormal lower motor neuron morphology	MATR3		Neurological
C1865412	Abnormal lower motor neuron morphology	SQSTM1		Neurological
C1866934	Decreased to absent deep tendon reflexes	MFN2		Neurological
C1963946	Laryngeal dystonia	FTL		Neurological
C1968790	Axonal degeneration/regeneration	MFN2		Neurological
C1969081	Arrhythmogenic Right Ventricular Dysplasia, Familial, 12	JUP	611528	Neurological
C2749625	Motor axonal neuropathy	CTDP1		Neurological
C3150692	AMYOTROPHIC LATERAL SCLEROSIS 12	OPTN	613435	Neurological
C3150731	EPILEPTIC ENCEPHALOPATHY, EARLY INFANTILE, 5	SPTAN1	613477	Neurological
C3278923	Dilated ventricles (finding)	KIF1A		Neurological
C3280271	PARKINSON DISEASE 18	EIF4G1	614251	Neurological
C3807521	AMYOTROPHIC LATERAL SCLEROSIS 21	MATR3	606070	Neurological
C4011788	Behavioral variant of frontotemporal dementia	SQSTM1		Neurological
C4014588	LEUKOENCEPHALOPATHY, PROGRESSIVE, WITH OVARIAN FAILURE	AARS2	615889	Neurological
C4020690	Abnormality of peripheral nerve conduction	CTDP1		Neurological
C4020811	Length dependent motor neuropathy	CTDP1		Neurological
C4020851	Cortical white matter abnormalities seen on MRI	SQSTM1		Neurological
C4020854	Neuro-degenerative disease	FTL		Neurological
C4020854	Neuro-degenerative disease	MATR3		Neurological
C4020854	Neuro-degenerative disease	OPTN		Neurological
C4020854	Neuro-degenerative disease	SQSTM1		Neurological
C4020856	Terminal tremor	CTDP1		Neurological
C4020858	Choreatic disease	CTDP1		Neurological
C4020858	Choreatic disease	FTL		Neurological
C4020860	Supratentorial atrophy	CTDP1		Neurological
C4020860	Supratentorial atrophy	PCCA		Neurological
C4020860	Supratentorial atrophy	SPTAN1		Neurological
C4020873	Infratentorial atrophy	KIF1A		Neurological
C4020873	Infratentorial atrophy	SPTAN1		Neurological
C4020875	Mental and motor retardation	ALDH5A1		Neurological
C4020875	Mental and motor retardation	CBL		Neurological
C4020875	Mental and motor retardation	CPS1		Neurological
C4020875	Mental and motor retardation	CTDP1		Neurological
C4020875	Mental and motor retardation	HNRNPK		Neurological
C4020875	Mental and motor retardation	KIF1A		Neurological
C4020875	Mental and motor retardation	PCCA		Neurological
C4020875	Mental and motor retardation	TUBB3		Neurological
C4021584	Frontotemporal cerebral atrophy	SQSTM1		Neurological
C4021726	EMG: myopathic abnormalities	SQSTM1		Neurological
C4021759	Generalized myoclonic seizures	ALDH5A1		Neurological
C4022159	Muscle fiber inclusion bodies	SQSTM1		Neurological
C4022169	EMG: myotonic discharges	SQSTM1		Neurological
C4022798	Abnormal brain FDG positron emission tomography	SQSTM1		Neurological
C4022874	Abnormal size of pituitary gland	NFKB2		Neurological
C4023470	EEG with continuous slow activity	SQSTM1		Neurological
C4024900	Brainstem atrophy	KIF1A		Neurological
C4024921	Lower limb amyotrophy	KIF1A		Neurological
C4024952	Cavitation of the basal ganglia	FTL		Neurological
C4024964	Intraaxonal accumulation of curvilinear autofluorescent lipopigment storage material	NDRG1		Neurological
C4025616	CNS hypomyelination	SPTAN1		Neurological
C4025619	Peripheral axonal atrophy	MFN2		Neurological
C4025723	Abnormal upper motor neuron morphology	MATR3		Neurological
C4025830	Peripheral axonal degeneration	CTDP1		Neurological
C4025831	Abnormal peripheral nervous system morphology	FLNC		Neurological
C4082173	Porencephaly	KIF1A		Neurological
C4082299	Bulbar palsy	MATR3		Neurological
C4082299	Bulbar palsy	SQSTM1		Neurological
C4225326	FRONTOTEMPORAL DEMENTIA AND/OR AMYOTROPHIC LATERAL SCLEROSIS 3	SQSTM1	601530,616437	Neurological
C4274355	Autosomal dominant late onset Parkinson disease	EIF4G1		Neurological
C0028754	Obesity	FTL	601665	Nutritional
C0043094	Weight Gain	TPM4		Nutritional
C0231246	Failure to gain weight	CPS1		Nutritional
C0231246	Failure to gain weight	HCFC1		Nutritional
C0231246	Failure to gain weight	PCCA		Nutritional
C0232466	Feeding difficulties	GPHN		Nutritional
C0232466	Feeding difficulties	HNRNPK		Nutritional
C0232466	Feeding difficulties	KIF1A		Nutritional
C0948387	Secondary Adrenal Insufficiency	NFKB2		Nutritional
C1839531	Protein avoidance	CPS1		Nutritional
C2674608	Feeding difficulties in infancy	KIF1A		Nutritional
C2674608	Feeding difficulties in infancy	PCCA		Nutritional
C2931642	Benign symmetrical lipomatosis	MFN2		Nutritional
C0002418	Amblyopia	TUBB3		Ophthamological
C0005745	Blepharoptosis	CBL		Ophthamological
C0005745	Blepharoptosis	DNM2		Ophthamological
C0005745	Blepharoptosis	HNRNPK		Ophthamological
C0005745	Blepharoptosis	TUBB3		Ophthamological
C0005747	Blepharospasm	FTL		Ophthamological
C0009398	Color vision defect	MFN2		Ophthamological
C0009691	Congenital cataract	CTDP1		Ophthamological
C0009691	Congenital cataract	IARS2		Ophthamological
C0010038	Corneal Opacity	FLNB		Ophthamological
C0010038	Corneal Opacity	IKBKG		Ophthamological
C0014306	Enophthalmos	KDM5C		Ophthamological
C0015300	Exophthalmos	FLNB		Ophthamological
C0015310	Exotropia	TUBB3		Ophthamological
C0015393	Eye Abnormalities	KIF1A		Ophthamological
C0015397	Disorder of eye	KIF1A		Ophthamological
C0020490	Hyperopia	KDM5C		Ophthamological
C0026010	Microphthalmos	CTDP1		Ophthamological
C0026010	Microphthalmos	IKBKG		Ophthamological
C0027092	Myopia	KDM5C		Ophthamological
C0027092	Myopia	OPTN		Ophthamological
C0028738	Nystagmus	CTDP1		Ophthamological
C0028738	Nystagmus	IARS2		Ophthamological
C0028738	Nystagmus	TUBB3		Ophthamological
C0029124	Optic Atrophy	FTL		Ophthamological
C0029124	Optic Atrophy	IKBKG		Ophthamological
C0029124	Optic Atrophy	KIF1A		Ophthamological
C0029124	Optic Atrophy	MFN2		Ophthamological
C0035304	Retinal Degeneration	FTL		Ophthamological
C0035305	Retinal Detachment	IKBKG	180050	Ophthamological
C0035317	Retinal Hemorrhage	DNM2		Ophthamological
C0035317	Retinal Hemorrhage	IKBKG		Ophthamological
C0035320	Retinal Neovascularization	IKBKG		Ophthamological
C0038379	Strabismus	CTDP1		Ophthamological
C0038379	Strabismus	IKBKG		Ophthamological
C0038379	Strabismus	TCOF1		Ophthamological
C0038379	Strabismus	TUBB3		Ophthamological
C0042164	Uveitis	IKBKG		Ophthamological
C0042798	Low Vision	IKBKG		Ophthamological
C0042798	Low Vision	TCOF1		Ophthamological
C0086543	Cataract	CTDP1		Ophthamological
C0086543	Cataract	FLNB		Ophthamological
C0086543	Cataract	FTL		Ophthamological
C0086543	Cataract	IARS2		Ophthamological
C0086543	Cataract	IKBKG		Ophthamological
C0152191	Scotoma, Central	MFN2		Ophthamological
C0158551	Embryonal nuclear cataract (disorder)	FTL		Ophthamological
C0162292	External Ophthalmoplegia	DNM2		Ophthamological
C0162674	Chronic progressive external ophthalmoplegia	DNM2		Ophthamological
C0234629	Abnormal color vision	MFN2		Ophthamological
C0240063	Coloboma of iris	TCOF1		Ophthamological
C0242383	Age related macular degeneration	SQSTM1	590050	Ophthamological
C0266539	Congenital total cataract	FYCO1		Ophthamological
C0266544	Microcornea	CTDP1		Ophthamological
C0339573	Glaucoma, Primary Open Angle	OPTN	137760	Ophthamological
C0392557	Nuclear cataract	FYCO1		Ophthamological
C0423224	Sunken eyes	KDM5C		Ophthamological
C0497202	Abnormal ocular motility	ALDH5A1		Ophthamological
C0497202	Abnormal ocular motility	KIF1A		Ophthamological
C0521573	Coloboma of eyelid	TCOF1		Ophthamological
C0521719	Clouding of corneal stroma	FLNB		Ophthamological
C0521719	Clouding of corneal stroma	IKBKG		Ophthamological
C0554970	Pallor of optic disc	MFN2		Ophthamological
C1112705	Nuclear non-senile cataract	FYCO1		Ophthamological
C1167713	Corneal diameter decreased	CTDP1		Ophthamological
C1302995	Congenital Fibrosis of the Extraocular Muscles	TUBB3		Ophthamological
C1510497	Lens Opacities	CTDP1		Ophthamological
C1510497	Lens Opacities	FLNB		Ophthamological
C1510497	Lens Opacities	FTL		Ophthamological
C1510497	Lens Opacities	IARS2		Ophthamological
C1510497	Lens Opacities	IKBKG		Ophthamological
C1833213	Hyperferritinemia, hereditary, with congenital cataracts	FTL	600886	Ophthamological
C1836392	Dysmetric saccades	MFN2		Ophthamological
C1837760	Prominent eyes	FLNB		Ophthamological
C1843005	Absent eyelashes	TCOF1		Ophthamological
C1847730	GLAUCOMA, NORMAL TENSION, SUSCEPTIBILITY TO (finding)	OPTN	606657	Ophthamological
C1848490	Protruding eyes	FLNB		Ophthamological
C1848937	Rarefaction of retinal pigmentation	FLNB		Ophthamological
C1851107	Levator palpebrae superioris atrophy	TUBB3		Ophthamological
C1851108	Rectus superior atrophy	TUBB3		Ophthamological
C1853141	Slow decrease in visual acuity	MFN2		Ophthamological
C1858726	Congenital Cataracts, Facial Dysmorphism, And Neuropathy	CTDP1	604168	Ophthamological
C1862425	Prominent globes	FLNB		Ophthamological
C1864908	Cataract, autosomal recessive congenital 2	FYCO1	610019	Ophthamological
C1865244	Shallow orbits	FLNB		Ophthamological
C2748801	FIBROSIS OF EXTRAOCULAR MUSCLES, CONGENITAL, 3A, WITH OR WITHOUT EXTRAOCULAR INVOLVEMENT	TUBB3	600638	Ophthamological
C3277059	Congenital Bilateral Cataracts	CTDP1		Ophthamological
C3277059	Congenital Bilateral Cataracts	IARS2		Ophthamological
C3278981	Decreased visual acuity, slowly progressive	MFN2		Ophthamological
C3552853	Color vision defect, severe	MFN2		Ophthamological
C3665347	Visual Impairment	IKBKG		Ophthamological
C3665347	Visual Impairment	TCOF1		Ophthamological
C3665386	Abnormal vision	KIF1A		Ophthamological
C4024789	Nonprogressive restrictive external ophthalmoplegia	TUBB3		Ophthamological
C4280808	Abnormally small eyeball	CTDP1		Ophthamological
C4280808	Abnormally small eyeball	IKBKG		Ophthamological
C0001807	Aggressive behavior	ALDH5A1		Psychiatric
C0001807	Aggressive behavior	GLDC		Psychiatric
C0001807	Aggressive behavior	KDM5C		Psychiatric
C0001807	Aggressive behavior	SQSTM1		Psychiatric
C0001973	Alcoholic Intoxication, Chronic	GPHN	103780	Psychiatric
C0003467	Anxiety	ALDH5A1	607834	Psychiatric
C0003467	Anxiety	MATR3	607834	Psychiatric
C0003467	Anxiety	OPTN	607834	Psychiatric
C0003467	Anxiety	SQSTM1	607834	Psychiatric
C0004352	Autistic Disorder	ALDH5A1	209850	Psychiatric
C0004352	Autistic Disorder	KDM5C	209850	Psychiatric
C0004352	Autistic Disorder	LASP1	209850	Psychiatric
C0004352	Autistic Disorder	NBEA	209850	Psychiatric
C0004352	Autistic Disorder	PASK	209850	Psychiatric
C0005586	Bipolar Disorder	PIP4K2A	611535	Psychiatric
C0008073	Developmental Disabilities	CBL		Psychiatric
C0011581	Depressive disorder	FTL		Psychiatric
C0011581	Depressive disorder	MATR3		Psychiatric
C0011581	Depressive disorder	OPTN		Psychiatric
C0011581	Depressive disorder	SQSTM1		Psychiatric
C0012833	Dizziness	JUP		Psychiatric
C0013362	Dysarthria	FTL		Psychiatric
C0013362	Dysarthria	MATR3		Psychiatric
C0013362	Dysarthria	OPTN		Psychiatric
C0013362	Dysarthria	SQSTM1		Psychiatric
C0013528	Echolalia	SQSTM1		Psychiatric
C0018524	Hallucinations	ALDH5A1		Psychiatric
C0020796	Profound Mental Retardation	SPTAN1		Psychiatric
C0021125	Impulsive Behavior	GLDC		Psychiatric
C0023012	Language Delay	ALDH5A1		Psychiatric
C0023012	Language Delay	CBL		Psychiatric
C0023012	Language Delay	HUWE1		Psychiatric
C0023012	Language Delay	KDM5C		Psychiatric
C0023015	Language Disorders	SQSTM1		Psychiatric
C0025362	Mental Retardation	ALDH5A1		Psychiatric
C0025362	Mental Retardation	CPS1		Psychiatric
C0025362	Mental Retardation	CTDP1		Psychiatric
C0025362	Mental Retardation	FLNB		Psychiatric
C0025362	Mental Retardation	GLDC		Psychiatric
C0025362	Mental Retardation	HCFC1		Psychiatric
C0025362	Mental Retardation	HNRNPK		Psychiatric
C0025362	Mental Retardation	HUWE1		Psychiatric
C0025362	Mental Retardation	IKBKG		Psychiatric
C0025362	Mental Retardation	PCCA		Psychiatric
C0026106	Mild Mental Retardation	CTDP1		Psychiatric
C0026106	Mild Mental Retardation	HUWE1		Psychiatric
C0026106	Mild Mental Retardation	KIF11		Psychiatric
C0026351	Moderate mental retardation (I.Q. 35-49)	HUWE1		Psychiatric
C0026351	Moderate mental retardation (I.Q. 35-49)	TUBB3		Psychiatric
C0026884	Mutism	FTL		Psychiatric
C0026884	Mutism	SQSTM1		Psychiatric
C0033975	Psychotic Disorders	ALDH5A1		Psychiatric
C0033975	Psychotic Disorders	FTL		Psychiatric
C0036341	Schizophrenia	ENO1	181500	Psychiatric
C0036341	Schizophrenia	FLNB	181500	Psychiatric
C0036341	Schizophrenia	GSTM2	181500	Psychiatric
C0036341	Schizophrenia	LASP1	181500	Psychiatric
C0036341	Schizophrenia	LRP1	181500	Psychiatric
C0036341	Schizophrenia	PIP4K2A	181500	Psychiatric
C0036341	Schizophrenia	PLAA	181500	Psychiatric
C0036341	Schizophrenia	RB1CC1	181500	Psychiatric
C0036857	Severe mental retardation (I.Q. 20-34)	HUWE1		Psychiatric
C0036857	Severe mental retardation (I.Q. 20-34)	KDM5C		Psychiatric
C0036857	Severe mental retardation (I.Q. 20-34)	KIF1A		Psychiatric
C0036857	Severe mental retardation (I.Q. 20-34)	SPTAN1		Psychiatric
C0038271	Stereotyped Behavior	SQSTM1		Psychiatric
C0038273	Stereotypic Movement Disorder	SQSTM1		Psychiatric
C0041696	Unipolar Depression	LRP1	608516	Psychiatric
C0085271	Self-Injurious Behavior	ALDH5A1		Psychiatric
C0085632	Apathy	SQSTM1		Psychiatric
C0085633	Mood swings	FTL		Psychiatric
C0085633	Mood swings	MATR3		Psychiatric
C0085633	Mood swings	OPTN		Psychiatric
C0085633	Mood swings	SQSTM1		Psychiatric
C0232462	Decrease in appetite	PCCA		Psychiatric
C0233514	Abnormal behavior	ALDH5A1		Psychiatric
C0233715	Speech impairment	ALDH5A1		Psychiatric
C0233715	Speech impairment	CBL		Psychiatric
C0233715	Speech impairment	HUWE1		Psychiatric
C0233715	Speech impairment	KDM5C		Psychiatric
C0233794	Memory impairment	SQSTM1		Psychiatric
C0234144	Dysgraphia	SQSTM1		Psychiatric
C0236736	Cocaine-Related Disorders	GPHN		Psychiatric
C0240735	Personality change	SQSTM1		Psychiatric
C0241210	Speech Delay	ALDH5A1		Psychiatric
C0241210	Speech Delay	CBL		Psychiatric
C0241210	Speech Delay	HUWE1		Psychiatric
C0241210	Speech Delay	KDM5C		Psychiatric
C0338656	Impaired cognition	CTDP1		Psychiatric
C0349204	Nonorganic psychosis	FTL		Psychiatric
C0423903	Low intelligence	ALDH5A1		Psychiatric
C0423903	Low intelligence	CPS1		Psychiatric
C0423903	Low intelligence	CTDP1		Psychiatric
C0423903	Low intelligence	FLNB		Psychiatric
C0423903	Low intelligence	GLDC		Psychiatric
C0423903	Low intelligence	HCFC1		Psychiatric
C0423903	Low intelligence	HNRNPK		Psychiatric
C0423903	Low intelligence	HUWE1		Psychiatric
C0423903	Low intelligence	IKBKG		Psychiatric
C0423903	Low intelligence	PCCA		Psychiatric
C0424290	Compulsive hoarding	SQSTM1		Psychiatric
C0424295	Hyperactive behavior	ALDH5A1		Psychiatric
C0424295	Hyperactive behavior	GLDC		Psychiatric
C0424296	Social disinhibition	FTL		Psychiatric
C0424296	Social disinhibition	SQSTM1		Psychiatric
C0424323	Physical aggression	ALDH5A1		Psychiatric
C0424323	Physical aggression	GLDC		Psychiatric
C0424323	Physical aggression	KDM5C		Psychiatric
C0424323	Physical aggression	SQSTM1		Psychiatric
C0476254	Dyslexia	SQSTM1		Psychiatric
C0542223	Loss of speech	SQSTM1		Psychiatric
C0542476	Forgetful	SQSTM1		Psychiatric
C0548883	Low frustration tolerance	KDM5C		Psychiatric
C0557874	Global developmental delay	ALDH5A1		Psychiatric
C0557874	Global developmental delay	CBL		Psychiatric
C0557874	Global developmental delay	CPS1		Psychiatric
C0557874	Global developmental delay	CTDP1		Psychiatric
C0557874	Global developmental delay	HNRNPK		Psychiatric
C0557874	Global developmental delay	KIF1A		Psychiatric
C0557874	Global developmental delay	PCCA		Psychiatric
C0557874	Global developmental delay	TUBB3		Psychiatric
C0683322	Mental impairment	CTDP1		Psychiatric
C0796208	MENTAL RETARDATION, X-LINKED 3	HCFC1	309541	Psychiatric
C0917816	Mental deficiency	ALDH5A1		Psychiatric
C0917816	Mental deficiency	CPS1		Psychiatric
C0917816	Mental deficiency	CTDP1		Psychiatric
C0917816	Mental deficiency	FLNB		Psychiatric
C0917816	Mental deficiency	GLDC		Psychiatric
C0917816	Mental deficiency	HCFC1		Psychiatric
C0917816	Mental deficiency	HNRNPK		Psychiatric
C0917816	Mental deficiency	HUWE1		Psychiatric
C0917816	Mental deficiency	IKBKG		Psychiatric
C0917816	Mental deficiency	PCCA		Psychiatric
C0973461	Dysphasia	SQSTM1		Psychiatric
C1263846	Attention deficit hyperactivity disorder	IKBKG	143465	Psychiatric
C1269683	Major Depressive Disorder	LRP1	608516	Psychiatric
C1411876	Developmental arithmetic disorder	SQSTM1		Psychiatric
C1445953	Poor eye contact	GPHN		Psychiatric
C1457883	Aggressive reaction	ALDH5A1		Psychiatric
C1457883	Aggressive reaction	GLDC		Psychiatric
C1457883	Aggressive reaction	KDM5C		Psychiatric
C1457883	Aggressive reaction	SQSTM1		Psychiatric
C1527344	Dysphonia	FTL		Psychiatric
C1836038	Poor head control	GPHN		Psychiatric
C1843367	Poor school performance	ALDH5A1		Psychiatric
C1843367	Poor school performance	CPS1		Psychiatric
C1843367	Poor school performance	CTDP1		Psychiatric
C1843367	Poor school performance	FLNB		Psychiatric
C1843367	Poor school performance	GLDC		Psychiatric
C1843367	Poor school performance	HCFC1		Psychiatric
C1843367	Poor school performance	HNRNPK		Psychiatric
C1843367	Poor school performance	HUWE1		Psychiatric
C1843367	Poor school performance	IKBKG		Psychiatric
C1843367	Poor school performance	PCCA		Psychiatric
C1845243	MENTAL RETARDATION, X-LINKED, SYNDROMIC, CLAES-JENSEN TYPE	KDM5C	300534	Psychiatric
C1846168	MENTAL RETARDATION, X-LINKED, SYNDROMIC 10	HUWE1	300220	Psychiatric
C1848207	Poor speech	HNRNPK		Psychiatric
C1848207	Poor speech	SQSTM1		Psychiatric
C2675334	Restrictive behavior, interests, and activities	SQSTM1		Psychiatric
C2678046	Mental Retardation, X-Linked, Syndromic, Turner Type	HUWE1	300706	Psychiatric
C2700617	Irritation - emotion	CPS1		Psychiatric
C2700617	Irritation - emotion	GLDC		Psychiatric
C2700617	Irritation - emotion	SQSTM1		Psychiatric
C3161330	Profound intellectual disabilities	SPTAN1		Psychiatric
C3280283	MENTAL RETARDATION, AUTOSOMAL DOMINANT 9	KIF1A	614255	Psychiatric
C3714756	Intellectual Disability	ALDH5A1		Psychiatric
C3714756	Intellectual Disability	CPS1		Psychiatric
C3714756	Intellectual Disability	CTDP1		Psychiatric
C3714756	Intellectual Disability	FLNB		Psychiatric
C3714756	Intellectual Disability	GLDC		Psychiatric
C3714756	Intellectual Disability	HCFC1		Psychiatric
C3714756	Intellectual Disability	HNRNPK		Psychiatric
C3714756	Intellectual Disability	HUWE1		Psychiatric
C3714756	Intellectual Disability	IKBKG		Psychiatric
C3714756	Intellectual Disability	KDM5C		Psychiatric
C3714756	Intellectual Disability	PCCA		Psychiatric
C3887611	Restlessness	GLDC		Psychiatric
C3887611	Restlessness	KDM5C		Psychiatric
C3887611	Restlessness	SQSTM1		Psychiatric
C3887898	Infantile Spasm	KIF1A		Psychiatric
C4020884	Anxiety disease	ALDH5A1		Psychiatric
C4020884	Anxiety disease	MATR3		Psychiatric
C4020884	Anxiety disease	OPTN		Psychiatric
C4020884	Anxiety disease	SQSTM1		Psychiatric
C4021799	Restrictive behavior	SQSTM1		Psychiatric
C0010417	Cryptorchidism	CBL	219050	Renal
C0010417	Cryptorchidism	FLNB	219050	Renal
C0010417	Cryptorchidism	HNRNPK	219050	Renal
C0010417	Cryptorchidism	KDM5C	219050	Renal
C0022679	Cystic kidney	FLNB		Renal
C0542519	Congenital absence of kidney	KIF14		Renal
C2609414	Acute kidney injury	GSTM2		Renal
C3887499	Renal cyst	FLNB		Renal
C0002064	Alkalosis, Respiratory	CPS1		Respiratory
C0003578	Apnea	GPHN		Respiratory
C0003578	Apnea	PCCA		Respiratory
C0003949	Asbestosis	TPM4		Respiratory
C0004096	Asthma	NFKB2		Respiratory
C0006267	Bronchiectasis	NFKB2		Respiratory
C0013404	Dyspnea	MATR3		Respiratory
C0013404	Dyspnea	OPTN		Respiratory
C0013404	Dyspnea	SQSTM1		Respiratory
C0032285	Pneumonia	NFKB2		Respiratory
C0035229	Respiratory Insufficiency	CPS1		Respiratory
C0035229	Respiratory Insufficiency	DNM2		Respiratory
C0035229	Respiratory Insufficiency	FLNC		Respiratory
C0040583	Tracheal Stenosis	FLNB		Respiratory
C0085581	Restrictive lung disease	FLNB		Respiratory
C0231835	Tachypnea	PCCA		Respiratory
C0264353	Bronchomalacia	FLNB	211450	Respiratory
C0700198	Pulmonary aspiration	GPHN		Respiratory
C0700198	Pulmonary aspiration	MATR3		Respiratory
C0741796	Recurrent bronchitis	NFKB2		Respiratory
C0748140	Multiple pulmonary infections	NFKB2		Respiratory
C0876973	Infectious disease of lung	NFKB2		Respiratory
C0948187	Tracheomalacia	FLNB		Respiratory
C1145670	Respiratory Failure	MATR3		Respiratory
C1145670	Respiratory Failure	OPTN		Respiratory
C1145670	Respiratory Failure	SQSTM1		Respiratory
C1859117	Recurrent pulmonary infections	NFKB2		Respiratory
C2712334	Actual Aspiration	GPHN		Respiratory
C2712334	Actual Aspiration	MATR3		Respiratory
C3277226	Restrictive ventilatory defect	FLNB		Respiratory
C3714497	Reactive airway disease	NFKB2		Respiratory
C3806482	Recurrent respiratory infections	KIF1A		Respiratory
C3806482	Recurrent respiratory infections	NFKB2		Respiratory
C4020855	Respiratory function loss	CPS1		Respiratory
C4020855	Respiratory function loss	DNM2		Respiratory
C4020855	Respiratory function loss	FLNC		Respiratory
C0013336	Dwarfism	FLNB		Skeletal
C0014065	Congenital cerebral hernia	FLNB		Skeletal
C0020608	Hypodontia	FLNB		Skeletal
C0020608	Hypodontia	IKBKG		Skeletal
C0024003	Lordosis	FLNB		Skeletal
C0024003	Lordosis	KIF1A		Skeletal
C0037932	Curvature of spine	FLNB		Skeletal
C0037932	Curvature of spine	HNRNPK		Skeletal
C0037932	Curvature of spine	IARS2		Skeletal
C0037932	Curvature of spine	IKBKG		Skeletal
C0037932	Curvature of spine	MFN2		Skeletal
C0038018	Spondylolysis	FLNB		Skeletal
C0235942	Skull malformation	HNRNPK		Skeletal
C0426818	Thin rib	DNM2		Skeletal
C0575158	Kyphoscoliosis deformity of spine	CTDP1		Skeletal
C0575158	Kyphoscoliosis deformity of spine	IKBKG		Skeletal
C1184923	Lumbar lordosis	MFN2		Skeletal
C1836186	Fibular aplasia	FLNB		Skeletal
C1837081	Tibial bowing	FLNB		Skeletal
C1837485	Flat acetabular roof	FLNB		Skeletal
C1838608	Radial aplasia	FLNB		Skeletal
C1848934	SPONDYLOCARPOTARSAL SYNOSTOSIS SYNDROME	FLNB	272460	Skeletal
C1850558	Horizontal sacrum	FLNB		Skeletal
C1851313	Limited shoulder movement	SQSTM1		Skeletal
C1859399	Radial bowing	FLNB		Skeletal
C1862420	Tombstone-shaped proximal phalanges	FLNB		Skeletal
C1862421	Widened distal phalanges	FLNB		Skeletal
C1862428	Thoracic platyspondyly	FLNB		Skeletal
C1862481	Limited wrist extension	SQSTM1		Skeletal
C1865571	Hypoplasia or unilateral/bilateral absence of ulna	FLNB		Skeletal
C1867103	Limited elbow extension	HUWE1		Skeletal
C1968611	Proximal club shaped femurs	FLNB		Skeletal
C4015465	Thoracic kyphoscoliosis	IARS2		Skeletal
C4021953	Poorly ossified vertebrae	FLNB		Skeletal
C0011071	Sudden death	JUP		Unclassified
C0011175	Dehydration	PCCA		Unclassified
C0011998	Diastema of Teeth	KDM5C		Unclassified
C0016202	Flatfoot	FLNB		Unclassified
C0016382	Flushing	IKBKG		Unclassified
C0018843	Heat Stroke	NFKB2		Unclassified
C0019294	Hernia, Inguinal	GPHN		Unclassified
C0019322	Umbilical hernia	GPHN		Unclassified
C0019521	Hiccup	GLDC		Unclassified
C0019825	Hoarseness	MATR3		Unclassified
C0020305	Hydrops Fetalis	FLNB		Unclassified
C0020458	Hyperhidrosis disorder	IKBKG		Unclassified
C0020458	Hyperhidrosis disorder	JUP		Unclassified
C0020458	Hyperhidrosis disorder	KIF1A		Unclassified
C0034935	Babinski Reflex	CTDP1		Unclassified
C0034935	Babinski Reflex	FTL		Unclassified
C0034935	Babinski Reflex	KDM5C		Unclassified
C0034935	Babinski Reflex	KIF1A		Unclassified
C0034935	Babinski Reflex	MFN2		Unclassified
C0037769	West Syndrome	SPTAN1		Unclassified
C0038002	Splenomegaly	NFKB2		Unclassified
C0038990	Sweating	IKBKG		Unclassified
C0038990	Sweating	JUP		Unclassified
C0038990	Sweating	KIF1A		Unclassified
C0040412	Fissured tongue	KDM5C	137400	Unclassified
C0043352	Xerostomia	MATR3		Unclassified
C0043352	Xerostomia	OPTN		Unclassified
C0043352	Xerostomia	SQSTM1		Unclassified
C0085583	Choreoathetosis	FTL		Unclassified
C0149651	Clubbing	FLNB		Unclassified
C0234517	Anarthria speech disorder	FTL		Unclassified
C0234967	Choreoathetoid movements	FTL		Unclassified
C0238621	Aminoaciduria	CPS1		Unclassified
C0238651	Ankle clonus	KIF1A		Unclassified
C0277959	Coarse hair	IKBKG		Unclassified
C0343073	Wooly hair	JUP		Unclassified
C0396064	Bowing of vocal cord	MATR3		Unclassified
C0399385	Early tooth exfoliation	SQSTM1		Unclassified
C0410916	Neonatal Death	FLNB		Unclassified
C0423867	Fine hair	IKBKG		Unclassified
C0427144	Toe-walking gait	BICD2		Unclassified
C0454644	Delayed speech and language development	ALDH5A1		Unclassified
C0454644	Delayed speech and language development	CBL		Unclassified
C0454644	Delayed speech and language development	HUWE1		Unclassified
C0454644	Delayed speech and language development	KDM5C		Unclassified
C0544886	Somatic mutation	CBL		Unclassified
C0558165	Curly hair (finding)	JUP	139450	Unclassified
C0700590	Increased sweating	IKBKG		Unclassified
C0700590	Increased sweating	JUP		Unclassified
C0700590	Increased sweating	KIF1A		Unclassified
C0744897	Recurrent singultus	GLDC		Unclassified
C0751576	Partial Paralysis (Paresis) Vocal Cords	MFN2		Unclassified
C0853945	Oral mucosal blistering	JUP		Unclassified
C1257806	Chromosomal Instability	KIF11		Unclassified
C1740801	Exaggerated startle response	GPHN		Unclassified
C1832690	Vocal cord paresis in severe cases	MFN2		Unclassified
C1836014	Exaggerated acoustic startle response	GPHN		Unclassified
C1837098	Easy fatigability	DNM2		Unclassified
C1837514	Phenotypic variability	ALDH5A1		Unclassified
C1837514	Phenotypic variability	CBL		Unclassified
C1837514	Phenotypic variability	FTL		Unclassified
C1837514	Phenotypic variability	SQSTM1		Unclassified
C1837514	Phenotypic variability	TUBB3		Unclassified
C1839039	Highly variable clinical phenotype	ALDH5A1		Unclassified
C1839039	Highly variable clinical phenotype	CBL		Unclassified
C1839039	Highly variable clinical phenotype	FTL		Unclassified
C1839039	Highly variable clinical phenotype	SQSTM1		Unclassified
C1839039	Highly variable clinical phenotype	TUBB3		Unclassified
C1839541	Episodic ammonia intoxication	CPS1		Unclassified
C1843187	Hoarse voice due to vocal cord paresis	MFN2		Unclassified
C1844820	Range of joint movement increased	CBL		Unclassified
C1844947	Death in early childhood	DNM2		Unclassified
C1844947	Death in early childhood	GLDC		Unclassified
C1845977	X- linked recessive	HCFC1		Unclassified
C1845977	X- linked recessive	IKBKG		Unclassified
C1845977	X- linked recessive	KDM5C		Unclassified
C1846911	Compensatory chin elevation	TUBB3		Unclassified
C1847879	X-linked dominant	IKBKG		Unclassified
C1848918	Increased startle response	GPHN		Unclassified
C1850667	Highly variable phenotype and severity	ALDH5A1		Unclassified
C1850667	Highly variable phenotype and severity	CBL		Unclassified
C1850667	Highly variable phenotype and severity	FTL		Unclassified
C1850667	Highly variable phenotype and severity	SQSTM1		Unclassified
C1850667	Highly variable phenotype and severity	TUBB3		Unclassified
C1853237	Isolated cases	FLNB		Unclassified
C1853487	Bushy eyebrows	IARS2		Unclassified
C1853562	Adult onset	FLNC		Unclassified
C1853562	Adult onset	MATR3		Unclassified
C1853729	Weakness of vocal cord	MFN2		Unclassified
C1854494	Slow progression	DNM2		Unclassified
C1854494	Slow progression	FLNC		Unclassified
C1854494	Slow progression	KIF1A		Unclassified
C1854494	Slow progression	MFN2		Unclassified
C1856599	Beaked vertebral bodies	FLNB		Unclassified
C1857108	Decreased joint mobility	KIF1A		Unclassified
C1857171	Hyperhidrosis, episodic	KIF1A		Unclassified
C1857269	Hitchhiker thumb	FLNB		Unclassified
C1858430	Death in infancy	DNM2		Unclassified
C1858430	Death in infancy	GLDC		Unclassified
C1860099	Acral ulceration leading to autoamputation of digits	KIF1A		Unclassified
C1861403	Variable expressivity	BICD2		Unclassified
C1861403	Variable expressivity	KIF1A		Unclassified
C1861403	Variable expressivity	MATR3		Unclassified
C1861403	Variable expressivity	MFN2		Unclassified
C1861403	Variable expressivity	NFKB2		Unclassified
C1861403	Variable expressivity	SPTAN1		Unclassified
C1866210	Highly variable phenotype, even within families	ALDH5A1		Unclassified
C1866210	Highly variable phenotype, even within families	CBL		Unclassified
C1866210	Highly variable phenotype, even within families	FTL		Unclassified
C1866210	Highly variable phenotype, even within families	SQSTM1		Unclassified
C1866210	Highly variable phenotype, even within families	TUBB3		Unclassified
C1866862	Highly variable severity	BICD2		Unclassified
C1866862	Highly variable severity	KIF1A		Unclassified
C1866862	Highly variable severity	MATR3		Unclassified
C1866862	Highly variable severity	MFN2		Unclassified
C1866862	Highly variable severity	NFKB2		Unclassified
C1866862	Highly variable severity	SPTAN1		Unclassified
C3279725	Weakness of hip flexors	SQSTM1		Unclassified
C3550658	Maternal oligohydramnios	KIF14		Unclassified
C3806443	Puffy cheeks	KIF1A		Unclassified
C4020876	Dull intelligence	ALDH5A1		Unclassified
C4020876	Dull intelligence	CPS1		Unclassified
C4020876	Dull intelligence	CTDP1		Unclassified
C4020876	Dull intelligence	FLNB		Unclassified
C4020876	Dull intelligence	GLDC		Unclassified
C4020876	Dull intelligence	HCFC1		Unclassified
C4020876	Dull intelligence	HNRNPK		Unclassified
C4020876	Dull intelligence	HUWE1		Unclassified
C4020876	Dull intelligence	IKBKG		Unclassified
C4020876	Dull intelligence	PCCA		Unclassified
C4020899	Autosomal recessive predisposition	ALDH5A1		Unclassified
C4020899	Autosomal recessive predisposition	CAST		Unclassified
C4020899	Autosomal recessive predisposition	CPS1		Unclassified
C4020899	Autosomal recessive predisposition	CTDP1		Unclassified
C4020899	Autosomal recessive predisposition	DNM2		Unclassified
C4020899	Autosomal recessive predisposition	FLNB		Unclassified
C4020899	Autosomal recessive predisposition	FTL		Unclassified
C4020899	Autosomal recessive predisposition	GLDC		Unclassified
C4020899	Autosomal recessive predisposition	GPHN		Unclassified
C4020899	Autosomal recessive predisposition	IARS2		Unclassified
C4020899	Autosomal recessive predisposition	JUP		Unclassified
C4020899	Autosomal recessive predisposition	KIF14		Unclassified
C4020899	Autosomal recessive predisposition	KIF1A		Unclassified
C4020899	Autosomal recessive predisposition	MFN2		Unclassified
C4020899	Autosomal recessive predisposition	NDRG1		Unclassified
C4020899	Autosomal recessive predisposition	PCCA		Unclassified
C4020899	Autosomal recessive predisposition	SERPINB6		Unclassified
C4025314	Atrophic, patchy alopecia	IKBKG		Unclassified
C4225274	AU-KLINE SYNDROME	HNRNPK	616580	Unclassified
C4280380	Repeated speech	SQSTM1		Unclassified
